# Supplementary material for: Dynamic Epigenetic Control of Highly Conserved Noncoding Elements
Source: PLoS One. 2014 Oct 7;9(10):e109326. doi: 10.1371/journal.pone.0109326 (PMC4188601; doi:10.1371/journal.pone.0109326)
Supplement: Table S1 — Table listing the HCNEs defined in this study. (XLSX) [file pone.0109326.s004.xlsx]

## Sheet: HCNEs
ID	Region	Chromosome	Start	End	Length	GC
chr2L-10094924	intron	chr2L	10094924	10095128	204	0.328431
chr2L-10478003	intron	chr2L	10478003	10478217	214	0.378505
chr2L-10478556	intron	chr2L	10478556	10478815	259	0.436293
chr2L-10631612	intron	chr2L	10631612	10631842	230	0.395652
chr2L-10720020	intergenic	chr2L	10720020	10720248	228	0.434211
chr2L-11012901	intergenic	chr2L	11012901	11013149	248	0.53629
chr2L-11241362	intron	chr2L	11241362	11241677	315	0.396825
chr2L-11333722	intergenic	chr2L	11333722	11333927	205	0.331707
chr2L-11335034	intergenic	chr2L	11335034	11335242	208	0.379808
chr2L-11379241	intergenic	chr2L	11379241	11379577	336	0.491071
chr2L-11404156	intergenic	chr2L	11404156	11404363	207	0.381643
chr2L-11673616	intergenic	chr2L	11673616	11673825	209	0.421053
chr2L-11717673	intergenic	chr2L	11717673	11717961	288	0.364583
chr2L-11786687	intergenic	chr2L	11786687	11786900	213	0.408451
chr2L-1186730	intron	chr2L	1186730	1186937	207	0.304348
chr2L-11872943	intron	chr2L	11872943	11873189	246	0.479675
chr2L-11972403	intergenic	chr2L	11972403	11972604	201	0.482587
chr2L-12210378	intron	chr2L	12210378	12210598	220	0.395455
chr2L-12393096	intron	chr2L	12393096	12393391	295	0.233898
chr2L-1279626	intron	chr2L	1279626	1279941	315	0.409524
chr2L-12802514	intergenic	chr2L	12802514	12802777	263	0.448669
chr2L-12802829	intergenic	chr2L	12802829	12803048	219	0.43379
chr2L-12883938	intergenic	chr2L	12883938	12884143	205	0.443902
chr2L-12907458	intergenic	chr2L	12907458	12907718	260	0.446154
chr2L-1304760	intergenic	chr2L	1304760	1305041	281	0.448399
chr2L-13103244	intergenic	chr2L	13103244	13103445	201	0.343284
chr2L-13158287	intergenic	chr2L	13158287	13158490	203	0.482759
chr2L-13590446	intron	chr2L	13590446	13590663	217	0.447005
chr2L-13647755	intergenic	chr2L	13647755	13647983	228	0.469298
chr2L-13654754	intergenic	chr2L	13654754	13654984	230	0.478261
chr2L-13656807	intergenic	chr2L	13656807	13657032	225	0.466667
chr2L-13663801	intergenic	chr2L	13663801	13664031	230	0.473913
chr2L-13697109	intron	chr2L	13697109	13697374	265	0.403774
chr2L-13702442	intron	chr2L	13702442	13702648	206	0.470874
chr2L-13703019	intron	chr2L	13703019	13703230	211	0.402844
chr2L-13749425	intron	chr2L	13749425	13749697	272	0.430147
chr2L-13942090	intron	chr2L	13942090	13942342	252	0.460317
chr2L-13996586	intron	chr2L	13996586	13996812	226	0.380531
chr2L-14098291	intergenic	chr2L	14098291	14098514	223	0.426009
chr2L-14115580	intergenic	chr2L	14115580	14115783	203	0.374384
chr2L-1417012	intron	chr2L	1417012	1417217	205	0.414634
chr2L-14261107	intergenic	chr2L	14261107	14261321	214	0.453271
chr2L-14299170	intron	chr2L	14299170	14299417	247	0.392713
chr2L-14302167	intron	chr2L	14302167	14302369	202	0.460396
chr2L-14369827	intergenic	chr2L	14369827	14370036	209	0.440191
chr2L-14370384	intergenic	chr2L	14370384	14370625	241	0.493776
chr2L-14397996	intron	chr2L	14397996	14398200	204	0.465686
chr2L-14423479	intergenic	chr2L	14423479	14423688	209	0.45933
chr2L-14426507	intergenic	chr2L	14426507	14426747	240	0.516667
chr2L-14453242	intergenic	chr2L	14453242	14453474	232	0.443966
chr2L-14472353	intergenic	chr2L	14472353	14472563	210	0.433333
chr2L-14476872	intergenic	chr2L	14476872	14477106	234	0.42735
chr2L-14499681	intergenic	chr2L	14499681	14500066	385	0.394805
chr2L-14500238	intergenic	chr2L	14500238	14500451	213	0.380282
chr2L-14502862	intergenic	chr2L	14502862	14503079	217	0.529954
chr2L-14528856	intergenic	chr2L	14528856	14529144	288	0.416667
chr2L-14529780	intergenic	chr2L	14529780	14530200	420	0.480952
chr2L-1455890	intergenic	chr2L	1455890	1456091	201	0.497512
chr2L-1457075	intergenic	chr2L	1457075	1457281	206	0.514563
chr2L-14581100	intergenic	chr2L	14581100	14581335	235	0.421277
chr2L-1463728	intergenic	chr2L	1463728	1463930	202	0.366337
chr2L-14750494	intergenic	chr2L	14750494	14750726	232	0.482759
chr2L-14826280	intergenic	chr2L	14826280	14826552	272	0.474265
chr2L-14828829	intergenic	chr2L	14828829	14829155	326	0.429448
chr2L-15040807	intron	chr2L	15040807	15041020	213	0.43662
chr2L-1504707	intergenic	chr2L	1504707	1504976	269	0.423792
chr2L-15151259	intergenic	chr2L	15151259	15151459	200	0.415
chr2L-15184707	intron	chr2L	15184707	15184923	216	0.398148
chr2L-15210070	intergenic	chr2L	15210070	15210296	226	0.411504
chr2L-15219290	intergenic	chr2L	15219290	15219503	213	0.384977
chr2L-15294730	intergenic	chr2L	15294730	15294983	253	0.411067
chr2L-15315284	intergenic	chr2L	15315284	15315490	206	0.485437
chr2L-15317446	intergenic	chr2L	15317446	15317653	207	0.512077
chr2L-15348902	intergenic	chr2L	15348902	15349109	207	0.410628
chr2L-15359849	intergenic	chr2L	15359849	15360107	258	0.453488
chr2L-15363668	intergenic	chr2L	15363668	15363875	207	0.454106
chr2L-15364512	intergenic	chr2L	15364512	15364771	259	0.490348
chr2L-15366481	intergenic	chr2L	15366481	15366719	238	0.386555
chr2L-15368292	intergenic	chr2L	15368292	15368495	203	0.433498
chr2L-15375332	intergenic	chr2L	15375332	15375536	204	0.54902
chr2L-15376134	intergenic	chr2L	15376134	15376375	241	0.493776
chr2L-15392228	intergenic	chr2L	15392228	15392437	209	0.550239
chr2L-15397311	intergenic	chr2L	15397311	15397526	215	0.4
chr2L-15398259	intergenic	chr2L	15398259	15398473	214	0.485981
chr2L-15400519	intergenic	chr2L	15400519	15400740	221	0.393665
chr2L-15403508	intergenic	chr2L	15403508	15403720	212	0.471698
chr2L-15415139	intergenic	chr2L	15415139	15415342	203	0.458128
chr2L-15415820	intergenic	chr2L	15415820	15416078	258	0.403101
chr2L-15416718	intergenic	chr2L	15416718	15417025	307	0.387622
chr2L-15422737	intergenic	chr2L	15422737	15423035	298	0.436242
chr2L-15439512	intergenic	chr2L	15439512	15440224	712	0.390449
chr2L-15470108	intergenic	chr2L	15470108	15470325	217	0.451613
chr2L-15584188	intergenic	chr2L	15584188	15584395	207	0.458937
chr2L-15619104	intergenic	chr2L	15619104	15619321	217	0.479263
chr2L-15639606	intergenic	chr2L	15639606	15639878	272	0.507353
chr2L-1565291	intron	chr2L	1565291	1565505	214	0.457944
chr2L-15778074	intergenic	chr2L	15778074	15778336	262	0.354962
chr2L-15859527	intergenic	chr2L	15859527	15859736	209	0.526316
chr2L-15914990	intron	chr2L	15914990	15915239	249	0.493976
chr2L-15929265	intron	chr2L	15929265	15929485	220	0.418182
chr2L-15968453	intergenic	chr2L	15968453	15968821	368	0.461957
chr2L-15991405	intergenic	chr2L	15991405	15991623	218	0.449541
chr2L-16019584	intron	chr2L	16019584	16019786	202	0.391089
chr2L-16247488	intron	chr2L	16247488	16247828	340	0.435294
chr2L-1648928	intergenic	chr2L	1648928	1649129	201	0.467662
chr2L-16564700	intron	chr2L	16564700	16564940	240	0.445833
chr2L-16805667	intron	chr2L	16805667	16805871	204	0.421569
chr2L-1683143	intron	chr2L	1683143	1683431	288	0.364583
chr2L-17044361	intergenic	chr2L	17044361	17044598	237	0.362869
chr2L-17107240	intergenic	chr2L	17107240	17107467	227	0.436123
chr2L-17237819	intron	chr2L	17237819	17238043	224	0.424107
chr2L-17732553	intron	chr2L	17732553	17732756	203	0.423645
chr2L-17771315	intron	chr2L	17771315	17771524	209	0.416268
chr2L-17924907	intergenic	chr2L	17924907	17925136	229	0.432314
chr2L-18001084	intergenic	chr2L	18001084	18001327	243	0.423868
chr2L-18401440	intergenic	chr2L	18401440	18401653	213	0.42723
chr2L-18435542	intergenic	chr2L	18435542	18435743	201	0.522388
chr2L-18719232	intron	chr2L	18719232	18719527	295	0.471186
chr2L-18744496	intergenic	chr2L	18744496	18744716	220	0.445455
chr2L-18747511	intergenic	chr2L	18747511	18747789	278	0.446043
chr2L-18759984	intergenic	chr2L	18759984	18760187	203	0.527094
chr2L-18790067	intron	chr2L	18790067	18790353	286	0.381119
chr2L-18884859	intergenic	chr2L	18884859	18885087	228	0.47807
chr2L-18907219	intergenic	chr2L	18907219	18907419	200	0.55
chr2L-19222522	intergenic	chr2L	19222522	19222750	228	0.517544
chr2L-19223260	intergenic	chr2L	19223260	19223493	233	0.55794
chr2L-19229881	intergenic	chr2L	19229881	19230126	245	0.485714
chr2L-19335502	intergenic	chr2L	19335502	19335729	227	0.39207
chr2L-19618720	intron	chr2L	19618720	19618939	219	0.39726
chr2L-19724602	intron	chr2L	19724602	19725002	400	0.275
chr2L-19755205	intron	chr2L	19755205	19755425	220	0.454545
chr2L-19937388	intron	chr2L	19937388	19937613	225	0.444444
chr2L-20243371	intergenic	chr2L	20243371	20243580	209	0.421053
chr2L-20305912	intergenic	chr2L	20305912	20306118	206	0.34466
chr2L-20501672	intergenic	chr2L	20501672	20501890	218	0.426605
chr2L-20521624	intergenic	chr2L	20521624	20521854	230	0.443478
chr2L-20541472	intergenic	chr2L	20541472	20541719	247	0.417004
chr2L-20548319	intergenic	chr2L	20548319	20548542	223	0.430493
chr2L-20574494	intergenic	chr2L	20574494	20574759	265	0.475472
chr2L-20629830	intergenic	chr2L	20629830	20630152	322	0.465839
chr2L-20843843	intron	chr2L	20843843	20844079	236	0.394068
chr2L-20948357	intergenic	chr2L	20948357	20948661	304	0.4375
chr2L-21019812	intron	chr2L	21019812	21020030	218	0.513761
chr2L-21789970	intron	chr2L	21789970	21790213	243	0.436214
chr2L-21816969	intergenic	chr2L	21816969	21817169	200	0.41
chr2L-21843519	intergenic	chr2L	21843519	21843742	223	0.41704
chr2L-21866317	intron	chr2L	21866317	21866550	233	0.373391
chr2L-21872105	intergenic	chr2L	21872105	21872342	237	0.514768
chr2L-21876393	intergenic	chr2L	21876393	21876677	284	0.355634
chr2L-21923680	intergenic	chr2L	21923680	21923889	209	0.521531
chr2L-21928822	intergenic	chr2L	21928822	21929063	241	0.394191
chr2L-21961708	intergenic	chr2L	21961708	21961981	273	0.457875
chr2L-21974342	intergenic	chr2L	21974342	21974547	205	0.482927
chr2L-22081713	intergenic	chr2L	22081713	22081913	200	0.465
chr2L-2425845	intergenic	chr2L	2425845	2426110	265	0.486792
chr2L-2433779	intron	chr2L	2433779	2433979	200	0.405
chr2L-2444270	intron	chr2L	2444270	2444490	220	0.513636
chr2L-2469370	intergenic	chr2L	2469370	2469669	299	0.45485
chr2L-2470549	intergenic	chr2L	2470549	2470777	228	0.447368
chr2L-2473928	intergenic	chr2L	2473928	2474164	236	0.398305
chr2L-2482084	intergenic	chr2L	2482084	2482288	204	0.426471
chr2L-2514250	intergenic	chr2L	2514250	2514488	238	0.37395
chr2L-2627128	intergenic	chr2L	2627128	2627328	200	0.475
chr2L-2652618	intergenic	chr2L	2652618	2652862	244	0.360656
chr2L-3011262	intron	chr2L	3011262	3011499	237	0.438819
chr2L-3552664	intergenic	chr2L	3552664	3552881	217	0.506912
chr2L-3592600	intergenic	chr2L	3592600	3592954	354	0.412429
chr2L-3597438	intergenic	chr2L	3597438	3597643	205	0.463415
chr2L-3666540	intron	chr2L	3666540	3666774	234	0.354701
chr2L-3708695	intron	chr2L	3708695	3708924	229	0.471616
chr2L-372128	intergenic	chr2L	372128	372344	216	0.384259
chr2L-3845457	intergenic	chr2L	3845457	3845659	202	0.509901
chr2L-3998937	intergenic	chr2L	3998937	3999160	223	0.452915
chr2L-4266971	intergenic	chr2L	4266971	4267183	212	0.542453
chr2L-4350480	intergenic	chr2L	4350480	4350751	271	0.409594
chr2L-4550381	intron	chr2L	4550381	4550590	209	0.301435
chr2L-4550645	intron	chr2L	4550645	4550862	217	0.354839
chr2L-4571578	intron	chr2L	4571578	4571823	245	0.408163
chr2L-4592315	intron	chr2L	4592315	4592581	266	0.432331
chr2L-4599741	intron	chr2L	4599741	4599982	241	0.473029
chr2L-4613081	intron	chr2L	4613081	4613281	200	0.48
chr2L-4613284	intron	chr2L	4613284	4613507	223	0.421525
chr2L-4614910	intergenic	chr2L	4614910	4615119	209	0.454545
chr2L-4621572	intergenic	chr2L	4621572	4621789	217	0.470046
chr2L-4625884	intergenic	chr2L	4625884	4626121	237	0.405063
chr2L-4649102	intergenic	chr2L	4649102	4649365	263	0.479087
chr2L-4653503	intergenic	chr2L	4653503	4653804	301	0.395349
chr2L-4728141	intergenic	chr2L	4728141	4728415	274	0.485401
chr2L-4762353	intron	chr2L	4762353	4762561	208	0.399038
chr2L-4786121	intron	chr2L	4786121	4786346	225	0.502222
chr2L-4787919	intron	chr2L	4787919	4788140	221	0.475113
chr2L-495458	intron	chr2L	495458	495667	209	0.401914
chr2L-5226914	intron	chr2L	5226914	5227142	228	0.47807
chr2L-5230071	intron	chr2L	5230071	5230321	250	0.396
chr2L-523023	intron	chr2L	523023	523278	255	0.470588
chr2L-5260440	intron	chr2L	5260440	5260702	262	0.458015
chr2L-528934	intron	chr2L	528934	529140	206	0.349515
chr2L-5333448	intron	chr2L	5333448	5333668	220	0.459091
chr2L-5367248	intergenic	chr2L	5367248	5367454	206	0.446602
chr2L-5414773	intron	chr2L	5414773	5415161	388	0.492268
chr2L-5495406	intergenic	chr2L	5495406	5495708	302	0.417219
chr2L-5500276	intergenic	chr2L	5500276	5500495	219	0.506849
chr2L-5511527	intergenic	chr2L	5511527	5511766	239	0.439331
chr2L-5569935	intergenic	chr2L	5569935	5570137	202	0.480198
chr2L-5575509	intergenic	chr2L	5575509	5575737	228	0.425439
chr2L-5613792	intron	chr2L	5613792	5613993	201	0.39801
chr2L-5644125	intron	chr2L	5644125	5644382	257	0.404669
chr2L-6307726	intron	chr2L	6307726	6307943	217	0.488479
chr2L-6819744	intergenic	chr2L	6819744	6820030	286	0.339161
chr2L-6824042	intron	chr2L	6824042	6824249	207	0.458937
chr2L-7122255	intron	chr2L	7122255	7122481	226	0.424779
chr2L-722712	intergenic	chr2L	722712	722927	215	0.469767
chr2L-7298987	intergenic	chr2L	7298987	7299212	225	0.426667
chr2L-7301098	intergenic	chr2L	7301098	7301304	206	0.436893
chr2L-7327391	intergenic	chr2L	7327391	7327604	213	0.389671
chr2L-7328401	intergenic	chr2L	7328401	7328703	302	0.397351
chr2L-7368057	intron	chr2L	7368057	7368279	222	0.396396
chr2L-7372439	intron	chr2L	7372439	7372659	220	0.486364
chr2L-7372899	intron	chr2L	7372899	7373100	201	0.512438
chr2L-7630118	intergenic	chr2L	7630118	7630358	240	0.416667
chr2L-7950084	intron	chr2L	7950084	7950324	240	0.470833
chr2L-844921	intron	chr2L	844921	845126	205	0.517073
chr2L-85746	intron	chr2L	85746	85957	211	0.459716
chr2L-8579540	intron	chr2L	8579540	8579746	206	0.480583
chr2L-8628480	intron	chr2L	8628480	8628683	203	0.46798
chr2L-8632668	intron	chr2L	8632668	8632901	233	0.44206
chr2L-8663292	intron	chr2L	8663292	8663507	215	0.4
chr2L-8804528	intergenic	chr2L	8804528	8804731	203	0.453202
chr2L-8906825	intron	chr2L	8906825	8907086	261	0.425287
chr2L-8911704	intron	chr2L	8911704	8911929	225	0.413333
chr2L-9284801	intron	chr2L	9284801	9285040	239	0.430962
chr2L-9723185	intron	chr2L	9723185	9723397	212	0.25
chr2L-9801680	intron	chr2L	9801680	9802039	359	0.328691
chr2L-9850220	intron	chr2L	9850220	9850442	222	0.454955
chr2L-9950831	intergenic	chr2L	9950831	9951069	238	0.537815
chr2R-10193335	intergenic	chr2R	10193335	10193569	234	0.435897
chr2R-10234364	intron	chr2R	10234364	10234734	370	0.454054
chr2R-10337109	intron	chr2R	10337109	10337327	218	0.555046
chr2R-10373432	intron	chr2R	10373432	10373663	231	0.38961
chr2R-10426167	intron	chr2R	10426167	10426409	242	0.495868
chr2R-10451520	intron	chr2R	10451520	10451726	206	0.529126
chr2R-10548068	intergenic	chr2R	10548068	10548280	212	0.448113
chr2R-10796680	intron	chr2R	10796680	10796921	241	0.390042
chr2R-10855012	intron	chr2R	10855012	10855313	301	0.481728
chr2R-10940325	intergenic	chr2R	10940325	10940538	213	0.460094
chr2R-10956919	intergenic	chr2R	10956919	10957126	207	0.381643
chr2R-10964868	intergenic	chr2R	10964868	10965144	276	0.373188
chr2R-11130372	intergenic	chr2R	11130372	11130589	217	0.428571
chr2R-11220332	intron	chr2R	11220332	11220566	234	0.487179
chr2R-11240831	intron	chr2R	11240831	11241036	205	0.492683
chr2R-11386203	intergenic	chr2R	11386203	11386455	252	0.480159
chr2R-11433423	intron	chr2R	11433423	11433693	270	0.492593
chr2R-1154998	intron	chr2R	1154998	1155241	243	0.419753
chr2R-11635186	intron	chr2R	11635186	11635445	259	0.3861
chr2R-11805665	intron	chr2R	11805665	11805889	224	0.361607
chr2R-12042151	intron	chr2R	12042151	12042355	204	0.470588
chr2R-12236652	intergenic	chr2R	12236652	12236855	203	0.44335
chr2R-12328561	intergenic	chr2R	12328561	12328795	234	0.461538
chr2R-12437876	intergenic	chr2R	12437876	12438108	232	0.353448
chr2R-13008507	intergenic	chr2R	13008507	13008713	206	0.509709
chr2R-13168928	intron	chr2R	13168928	13169132	204	0.480392
chr2R-13253215	intron	chr2R	13253215	13253502	287	0.243902
chr2R-13254836	intron	chr2R	13254836	13255130	294	0.278912
chr2R-13260183	intron	chr2R	13260183	13260399	216	0.310185
chr2R-13860798	intergenic	chr2R	13860798	13861029	231	0.467532
chr2R-13897350	intergenic	chr2R	13897350	13897555	205	0.453659
chr2R-14049862	intron	chr2R	14049862	14050063	201	0.328358
chr2R-14110640	intergenic	chr2R	14110640	14110936	296	0.476351
chr2R-14124668	intergenic	chr2R	14124668	14124898	230	0.46087
chr2R-14125986	intergenic	chr2R	14125986	14126190	204	0.426471
chr2R-14130027	intergenic	chr2R	14130027	14130268	241	0.473029
chr2R-14153019	intergenic	chr2R	14153019	14153329	310	0.503226
chr2R-14162364	intergenic	chr2R	14162364	14162566	202	0.485149
chr2R-14459062	intron	chr2R	14459062	14459275	213	0.478873
chr2R-14775248	intron	chr2R	14775248	14775465	217	0.483871
chr2R-15362881	intron	chr2R	15362881	15363186	305	0.344262
chr2R-15594404	intergenic	chr2R	15594404	15594647	243	0.325103
chr2R-15607526	intergenic	chr2R	15607526	15607814	288	0.364583
chr2R-15656611	intergenic	chr2R	15656611	15656816	205	0.385366
chr2R-15672581	intergenic	chr2R	15672581	15672876	295	0.416949
chr2R-1569068	intron	chr2R	1569068	1569338	270	0.396296
chr2R-15692073	intergenic	chr2R	15692073	15692283	210	0.452381
chr2R-15723021	intergenic	chr2R	15723021	15723232	211	0.393365
chr2R-15727268	intergenic	chr2R	15727268	15727479	211	0.459716
chr2R-15729357	intergenic	chr2R	15729357	15729610	253	0.498024
chr2R-15737284	intergenic	chr2R	15737284	15737509	225	0.351111
chr2R-15741165	intergenic	chr2R	15741165	15741385	220	0.413636
chr2R-15754861	intron	chr2R	15754861	15755096	235	0.47234
chr2R-15781720	intergenic	chr2R	15781720	15781938	218	0.37156
chr2R-15782276	intergenic	chr2R	15782276	15782492	216	0.375
chr2R-15803462	intergenic	chr2R	15803462	15803835	373	0.329759
chr2R-15825155	intergenic	chr2R	15825155	15825463	308	0.451299
chr2R-15867057	intron	chr2R	15867057	15867305	248	0.447581
chr2R-15884487	intergenic	chr2R	15884487	15884698	211	0.469194
chr2R-15887269	intergenic	chr2R	15887269	15887539	270	0.407407
chr2R-15955164	intergenic	chr2R	15955164	15955493	329	0.422492
chr2R-15960605	intergenic	chr2R	15960605	15960806	201	0.432836
chr2R-16037153	intergenic	chr2R	16037153	16037365	212	0.5
chr2R-16056078	intergenic	chr2R	16056078	16056320	242	0.524793
chr2R-16093269	intergenic	chr2R	16093269	16093484	215	0.404651
chr2R-16104433	intergenic	chr2R	16104433	16104646	213	0.460094
chr2R-16254435	intergenic	chr2R	16254435	16254636	201	0.358209
chr2R-16374832	intergenic	chr2R	16374832	16375059	227	0.370044
chr2R-16388169	intergenic	chr2R	16388169	16388390	221	0.434389
chr2R-16412134	intergenic	chr2R	16412134	16412414	280	0.492857
chr2R-16455537	intron	chr2R	16455537	16455738	201	0.457711
chr2R-16596775	intron	chr2R	16596775	16596976	201	0.437811
chr2R-16706333	intergenic	chr2R	16706333	16706552	219	0.520548
chr2R-17084065	intron	chr2R	17084065	17084269	204	0.387255
chr2R-17270195	intergenic	chr2R	17270195	17270395	200	0.42
chr2R-17457925	intron	chr2R	17457925	17458131	206	0.432039
chr2R-17462737	intron	chr2R	17462737	17462975	238	0.441176
chr2R-17473975	intergenic	chr2R	17473975	17474247	272	0.470588
chr2R-17474931	intergenic	chr2R	17474931	17475197	266	0.545113
chr2R-17477122	intergenic	chr2R	17477122	17477376	254	0.405512
chr2R-17482020	intergenic	chr2R	17482020	17482252	232	0.366379
chr2R-18044625	intron	chr2R	18044625	18044839	214	0.5
chr2R-18044900	intron	chr2R	18044900	18045118	218	0.458716
chr2R-18047065	intron	chr2R	18047065	18047391	326	0.444785
chr2R-18085609	intron	chr2R	18085609	18085822	213	0.502347
chr2R-18129472	intergenic	chr2R	18129472	18129701	229	0.467249
chr2R-18135998	intron	chr2R	18135998	18136212	214	0.420561
chr2R-18145040	intron	chr2R	18145040	18145263	223	0.44843
chr2R-18157939	intron	chr2R	18157939	18158147	208	0.451923
chr2R-18158936	intron	chr2R	18158936	18159140	204	0.421569
chr2R-18409925	intron	chr2R	18409925	18410173	248	0.475806
chr2R-18748027	intergenic	chr2R	18748027	18748254	227	0.422908
chr2R-18766380	intron	chr2R	18766380	18766593	213	0.58216
chr2R-18845516	intergenic	chr2R	18845516	18845809	293	0.464164
chr2R-18920424	intron	chr2R	18920424	18920651	227	0.453745
chr2R-18925507	intron	chr2R	18925507	18925764	257	0.552529
chr2R-18931540	intergenic	chr2R	18931540	18931761	221	0.429864
chr2R-19193235	intergenic	chr2R	19193235	19193441	206	0.504854
chr2R-19419784	intron	chr2R	19419784	19420274	490	0.377551
chr2R-19470168	intron	chr2R	19470168	19470401	233	0.373391
chr2R-19760725	intron	chr2R	19760725	19760932	207	0.454106
chr2R-19824083	intergenic	chr2R	19824083	19824355	272	0.448529
chr2R-20161365	intergenic	chr2R	20161365	20161568	203	0.551724
chr2R-20173428	intron	chr2R	20173428	20173633	205	0.458537
chr2R-20174244	intron	chr2R	20174244	20174517	273	0.534799
chr2R-20185643	intergenic	chr2R	20185643	20185995	352	0.485795
chr2R-20209118	intergenic	chr2R	20209118	20209358	240	0.508333
chr2R-20250711	intron	chr2R	20250711	20250941	230	0.547826
chr2R-20260463	intron	chr2R	20260463	20260857	394	0.472081
chr2R-20369600	intron	chr2R	20369600	20369827	227	0.475771
chr2R-20609935	intron	chr2R	20609935	20610240	305	0.432787
chr2R-20623237	intron	chr2R	20623237	20623523	286	0.468531
chr2R-20693115	intergenic	chr2R	20693115	20693336	221	0.470588
chr2R-20713906	intron	chr2R	20713906	20714190	284	0.429577
chr2R-20716158	intron	chr2R	20716158	20716574	416	0.435096
chr2R-20717670	intron	chr2R	20717670	20717955	285	0.431579
chr2R-20756791	intergenic	chr2R	20756791	20757049	258	0.403101
chr2R-20940842	intergenic	chr2R	20940842	20941058	216	0.37963
chr2R-21003149	intron	chr2R	21003149	21003360	211	0.417062
chr2R-21003544	intron	chr2R	21003544	21003767	223	0.394619
chr2R-21135641	intron	chr2R	21135641	21135885	244	0.364754
chr2R-3212420	intron	chr2R	3212420	3212719	299	0.337793
chr2R-3948899	intron	chr2R	3948899	3949171	272	0.492647
chr2R-4114145	intergenic	chr2R	4114145	4114361	216	0.453704
chr2R-4118593	intron	chr2R	4118593	4118882	289	0.415225
chr2R-4176476	intergenic	chr2R	4176476	4176715	239	0.51046
chr2R-4187674	intergenic	chr2R	4187674	4187983	309	0.514563
chr2R-4216275	intron	chr2R	4216275	4216673	398	0.404523
chr2R-4225699	intron	chr2R	4225699	4225973	274	0.328467
chr2R-4226524	intron	chr2R	4226524	4226746	222	0.5
chr2R-4227328	intron	chr2R	4227328	4227578	250	0.32
chr2R-4231484	intron	chr2R	4231484	4231718	234	0.410256
chr2R-4239139	intron	chr2R	4239139	4239391	252	0.396825
chr2R-4652115	intergenic	chr2R	4652115	4652366	251	0.47012
chr2R-4891998	intron	chr2R	4891998	4892199	201	0.502488
chr2R-4913451	intron	chr2R	4913451	4913675	224	0.450893
chr2R-5203953	intron	chr2R	5203953	5204156	203	0.44335
chr2R-5378676	intergenic	chr2R	5378676	5378888	212	0.45283
chr2R-5409046	intron	chr2R	5409046	5409268	222	0.301802
chr2R-5414094	intron	chr2R	5414094	5414296	202	0.306931
chr2R-5519480	intron	chr2R	5519480	5519752	272	0.419118
chr2R-5692294	intron	chr2R	5692294	5692498	204	0.465686
chr2R-6101488	intron	chr2R	6101488	6101704	216	0.574074
chr2R-6112895	intron	chr2R	6112895	6113103	208	0.5625
chr2R-6233993	intron	chr2R	6233993	6234237	244	0.454918
chr2R-6399704	intron	chr2R	6399704	6399908	204	0.245098
chr2R-6454195	intron	chr2R	6454195	6454451	256	0.398438
chr2R-6514017	intron	chr2R	6514017	6514232	215	0.376744
chr2R-6523376	intron	chr2R	6523376	6523577	201	0.338308
chr2R-6718376	intron	chr2R	6718376	6718581	205	0.370732
chr2R-6847486	intergenic	chr2R	6847486	6847696	210	0.457143
chr2R-6853327	intergenic	chr2R	6853327	6853551	224	0.477679
chr2R-6927710	intron	chr2R	6927710	6927916	206	0.427184
chr2R-6965494	intron	chr2R	6965494	6965755	261	0.494253
chr2R-7206214	intergenic	chr2R	7206214	7206447	233	0.493562
chr2R-7333000	intron	chr2R	7333000	7333287	287	0.372822
chr2R-7359711	intergenic	chr2R	7359711	7359991	280	0.439286
chr2R-7437761	intergenic	chr2R	7437761	7438001	240	0.483333
chr2R-7615581	intergenic	chr2R	7615581	7615787	206	0.383495
chr2R-7653841	intron	chr2R	7653841	7654108	267	0.430712
chr2R-7710762	intergenic	chr2R	7710762	7710982	220	0.490909
chr2R-7842298	intron	chr2R	7842298	7842510	212	0.386792
chr2R-824066	intron	chr2R	824066	824268	202	0.326733
chr2R-8381982	intron	chr2R	8381982	8382196	214	0.476636
chr2R-9256552	intergenic	chr2R	9256552	9256846	294	0.472789
chr2R-9297756	intergenic	chr2R	9297756	9297979	223	0.331839
chr2R-9486567	intergenic	chr2R	9486567	9486767	200	0.48
chr2R-9514278	intron	chr2R	9514278	9514540	262	0.435115
chr2R-9756997	intron	chr2R	9756997	9757212	215	0.302326
chr2R-9840930	intron	chr2R	9840930	9841184	254	0.26378
chr3L-10114552	intron	chr3L	10114552	10114770	218	0.399083
chr3L-1016305	intron	chr3L	1016305	1016508	203	0.423645
chr3L-10203933	intergenic	chr3L	10203933	10204176	243	0.432099
chr3L-10242874	intergenic	chr3L	10242874	10243078	204	0.485294
chr3L-10270810	intergenic	chr3L	10270810	10271025	215	0.427907
chr3L-10278858	intergenic	chr3L	10278858	10279067	209	0.411483
chr3L-10294589	intergenic	chr3L	10294589	10294805	216	0.453704
chr3L-10295380	intergenic	chr3L	10295380	10295583	203	0.44335
chr3L-10312111	intergenic	chr3L	10312111	10312322	211	0.412322
chr3L-10330300	intergenic	chr3L	10330300	10330506	206	0.383495
chr3L-10333806	intergenic	chr3L	10333806	10334044	238	0.369748
chr3L-10378971	intergenic	chr3L	10378971	10379180	209	0.38756
chr3L-10381186	intergenic	chr3L	10381186	10381658	472	0.46822
chr3L-10382563	intergenic	chr3L	10382563	10382773	210	0.414286
chr3L-10383938	intergenic	chr3L	10383938	10384178	240	0.4125
chr3L-10385204	intergenic	chr3L	10385204	10385444	240	0.4625
chr3L-10387805	intergenic	chr3L	10387805	10388016	211	0.454976
chr3L-10399002	intergenic	chr3L	10399002	10399216	214	0.453271
chr3L-10415299	intergenic	chr3L	10415299	10415507	208	0.466346
chr3L-10441823	intergenic	chr3L	10441823	10442123	300	0.406667
chr3L-10575659	intron	chr3L	10575659	10575876	217	0.341014
chr3L-1063867	intron	chr3L	1063867	1064167	300	0.443333
chr3L-1066710	intron	chr3L	1066710	1066936	226	0.393805
chr3L-10744293	intergenic	chr3L	10744293	10744522	229	0.353712
chr3L-1076202	intron	chr3L	1076202	1076496	294	0.391156
chr3L-10764489	intergenic	chr3L	10764489	10764699	210	0.357143
chr3L-10787304	intergenic	chr3L	10787304	10787517	213	0.422535
chr3L-10813148	intergenic	chr3L	10813148	10813447	299	0.391304
chr3L-10847466	intergenic	chr3L	10847466	10847778	312	0.480769
chr3L-10850003	intergenic	chr3L	10850003	10850222	219	0.410959
chr3L-10925448	intergenic	chr3L	10925448	10925701	253	0.391304
chr3L-10927361	intergenic	chr3L	10927361	10927659	298	0.496644
chr3L-10931134	intergenic	chr3L	10931134	10931349	215	0.348837
chr3L-10942544	intergenic	chr3L	10942544	10942753	209	0.511962
chr3L-10951842	intergenic	chr3L	10951842	10952098	256	0.457031
chr3L-10954520	intergenic	chr3L	10954520	10954738	218	0.417431
chr3L-10960822	intergenic	chr3L	10960822	10961073	251	0.505976
chr3L-10983973	intron	chr3L	10983973	10984194	221	0.506787
chr3L-11000135	intron	chr3L	11000135	11000408	273	0.490842
chr3L-11015260	intergenic	chr3L	11015260	11015530	270	0.451852
chr3L-1110444	intergenic	chr3L	1110444	1110664	220	0.45
chr3L-1122518	intergenic	chr3L	1122518	1122739	221	0.429864
chr3L-11361443	intergenic	chr3L	11361443	11361666	223	0.457399
chr3L-11382635	intergenic	chr3L	11382635	11382953	318	0.446541
chr3L-11391519	intergenic	chr3L	11391519	11391755	236	0.457627
chr3L-11394920	intergenic	chr3L	11394920	11395123	203	0.438424
chr3L-11412591	intergenic	chr3L	11412591	11412855	264	0.454545
chr3L-11422660	intergenic	chr3L	11422660	11422868	208	0.379808
chr3L-11465551	intergenic	chr3L	11465551	11465786	235	0.434043
chr3L-11465818	intergenic	chr3L	11465818	11466027	209	0.373206
chr3L-11468998	intergenic	chr3L	11468998	11469249	251	0.36255
chr3L-11585805	intergenic	chr3L	11585805	11586069	264	0.575758
chr3L-12276147	intergenic	chr3L	12276147	12276371	224	0.40625
chr3L-12288069	intron	chr3L	12288069	12288270	201	0.427861
chr3L-12308290	intergenic	chr3L	12308290	12308514	224	0.330357
chr3L-12443712	intergenic	chr3L	12443712	12443918	206	0.38835
chr3L-12544497	intron	chr3L	12544497	12544709	212	0.476415
chr3L-12560976	intron	chr3L	12560976	12561210	234	0.401709
chr3L-12592608	intergenic	chr3L	12592608	12592832	224	0.459821
chr3L-12594410	intergenic	chr3L	12594410	12594617	207	0.425121
chr3L-12612432	intron	chr3L	12612432	12612661	229	0.49345
chr3L-12616859	intergenic	chr3L	12616859	12617108	249	0.46988
chr3L-12625290	intron	chr3L	12625290	12625511	221	0.402715
chr3L-12656853	intergenic	chr3L	12656853	12657086	233	0.416309
chr3L-12658164	intergenic	chr3L	12658164	12658364	200	0.44
chr3L-12666318	intergenic	chr3L	12666318	12666603	285	0.466667
chr3L-12669640	intergenic	chr3L	12669640	12669864	224	0.486607
chr3L-12679170	intergenic	chr3L	12679170	12679389	219	0.410959
chr3L-12680722	intergenic	chr3L	12680722	12680936	214	0.425234
chr3L-12685648	intergenic	chr3L	12685648	12685973	325	0.470769
chr3L-12708430	intergenic	chr3L	12708430	12708631	201	0.313433
chr3L-12709175	intergenic	chr3L	12709175	12709395	220	0.313636
chr3L-12716393	intergenic	chr3L	12716393	12716701	308	0.431818
chr3L-12723763	intergenic	chr3L	12723763	12724096	333	0.387387
chr3L-12928347	intergenic	chr3L	12928347	12928547	200	0.395
chr3L-13092229	intergenic	chr3L	13092229	13092430	201	0.517413
chr3L-13093029	intergenic	chr3L	13093029	13093284	255	0.486275
chr3L-13095617	intergenic	chr3L	13095617	13095900	283	0.385159
chr3L-13173305	intergenic	chr3L	13173305	13173531	226	0.482301
chr3L-13290224	intergenic	chr3L	13290224	13290432	208	0.442308
chr3L-13313091	intergenic	chr3L	13313091	13313300	209	0.473684
chr3L-13338722	intergenic	chr3L	13338722	13338922	200	0.47
chr3L-13339692	intergenic	chr3L	13339692	13339924	232	0.413793
chr3L-13537112	intron	chr3L	13537112	13537328	216	0.606481
chr3L-13550223	intron	chr3L	13550223	13550453	230	0.5
chr3L-13563461	intron	chr3L	13563461	13563685	224	0.424107
chr3L-13564786	intron	chr3L	13564786	13565040	254	0.452756
chr3L-13567305	intron	chr3L	13567305	13567509	204	0.485294
chr3L-13585692	intron	chr3L	13585692	13585964	272	0.459559
chr3L-13596341	intron	chr3L	13596341	13596725	384	0.299479
chr3L-13600752	intron	chr3L	13600752	13600977	225	0.435556
chr3L-13606737	intron	chr3L	13606737	13606955	218	0.481651
chr3L-13630282	intron	chr3L	13630282	13630488	206	0.485437
chr3L-13631884	intron	chr3L	13631884	13632126	242	0.495868
chr3L-13663959	intron	chr3L	13663959	13664165	206	0.456311
chr3L-13690191	intron	chr3L	13690191	13690393	202	0.524752
chr3L-13762221	intron	chr3L	13762221	13762472	251	0.446215
chr3L-13777569	intron	chr3L	13777569	13777773	204	0.490196
chr3L-13995837	intron	chr3L	13995837	13996049	212	0.429245
chr3L-14093848	intergenic	chr3L	14093848	14094051	203	0.339901
chr3L-14094099	intergenic	chr3L	14094099	14094422	323	0.380805
chr3L-14126653	intergenic	chr3L	14126653	14126871	218	0.394495
chr3L-14128832	intergenic	chr3L	14128832	14129110	278	0.485611
chr3L-14133996	intergenic	chr3L	14133996	14134235	239	0.389121
chr3L-14135698	intergenic	chr3L	14135698	14135914	216	0.490741
chr3L-14137481	intergenic	chr3L	14137481	14137716	235	0.468085
chr3L-14138431	intergenic	chr3L	14138431	14138636	205	0.439024
chr3L-14139112	intergenic	chr3L	14139112	14139328	216	0.462963
chr3L-14150146	intergenic	chr3L	14150146	14150372	226	0.402655
chr3L-14159859	intergenic	chr3L	14159859	14160071	212	0.45283
chr3L-14164924	intergenic	chr3L	14164924	14165160	236	0.436441
chr3L-14165197	intergenic	chr3L	14165197	14165417	220	0.536364
chr3L-14355766	intron	chr3L	14355766	14355975	209	0.349282
chr3L-14381881	intergenic	chr3L	14381881	14382112	231	0.497835
chr3L-14477164	intron	chr3L	14477164	14477474	310	0.46129
chr3L-14512066	intron	chr3L	14512066	14512283	217	0.456221
chr3L-14563320	intergenic	chr3L	14563320	14563535	215	0.516279
chr3L-14568331	intergenic	chr3L	14568331	14568544	213	0.389671
chr3L-14580169	intron	chr3L	14580169	14580376	207	0.429952
chr3L-14583976	intron	chr3L	14583976	14584179	203	0.512315
chr3L-14611061	intron	chr3L	14611061	14611299	238	0.415966
chr3L-14685187	intron	chr3L	14685187	14685427	240	0.379167
chr3L-14803884	intron	chr3L	14803884	14804125	241	0.443983
chr3L-14811059	intron	chr3L	14811059	14811385	326	0.334356
chr3L-14817596	intron	chr3L	14817596	14817799	203	0.46798
chr3L-14822629	intron	chr3L	14822629	14823267	638	0.351097
chr3L-14842801	intron	chr3L	14842801	14843084	283	0.431095
chr3L-14864122	intron	chr3L	14864122	14864390	268	0.477612
chr3L-14867689	intron	chr3L	14867689	14867890	201	0.447761
chr3L-14868673	intron	chr3L	14868673	14868894	221	0.461538
chr3L-14877558	intergenic	chr3L	14877558	14877770	212	0.382075
chr3L-14880561	intergenic	chr3L	14880561	14880817	256	0.453125
chr3L-14884398	intergenic	chr3L	14884398	14884614	216	0.444444
chr3L-14910844	intron	chr3L	14910844	14911108	264	0.363636
chr3L-15182525	intergenic	chr3L	15182525	15182737	212	0.485849
chr3L-15218659	intergenic	chr3L	15218659	15218874	215	0.534884
chr3L-15219767	intergenic	chr3L	15219767	15220042	275	0.523636
chr3L-15352246	intergenic	chr3L	15352246	15352473	227	0.387665
chr3L-15369177	intergenic	chr3L	15369177	15369383	206	0.485437
chr3L-15444835	intergenic	chr3L	15444835	15445042	207	0.405797
chr3L-15476973	intergenic	chr3L	15476973	15477195	222	0.468468
chr3L-15527561	intergenic	chr3L	15527561	15527794	233	0.476395
chr3L-15533758	intron	chr3L	15533758	15533997	239	0.430962
chr3L-15536263	intron	chr3L	15536263	15536482	219	0.360731
chr3L-15671251	intergenic	chr3L	15671251	15671453	202	0.39604
chr3L-15671643	intergenic	chr3L	15671643	15671875	232	0.469828
chr3L-15722735	intergenic	chr3L	15722735	15722954	219	0.410959
chr3L-15756838	intergenic	chr3L	15756838	15757086	248	0.379032
chr3L-15847569	intron	chr3L	15847569	15847797	228	0.486842
chr3L-15868033	intron	chr3L	15868033	15868241	208	0.475962
chr3L-15883641	intron	chr3L	15883641	15883864	223	0.479821
chr3L-15910649	intron	chr3L	15910649	15910869	220	0.45
chr3L-15914865	intron	chr3L	15914865	15915065	200	0.52
chr3L-16021541	intron	chr3L	16021541	16021762	221	0.375566
chr3L-16138534	intron	chr3L	16138534	16138737	203	0.413793
chr3L-16321137	intergenic	chr3L	16321137	16321375	238	0.470588
chr3L-16470349	intron	chr3L	16470349	16470553	204	0.455882
chr3L-1659363	intron	chr3L	1659363	1659578	215	0.311628
chr3L-17089462	intron	chr3L	17089462	17089755	293	0.430034
chr3L-17167278	intron	chr3L	17167278	17167592	314	0.39172
chr3L-17170600	intron	chr3L	17170600	17170817	217	0.37788
chr3L-17258405	intergenic	chr3L	17258405	17258626	221	0.429864
chr3L-17299193	intergenic	chr3L	17299193	17299417	224	0.441964
chr3L-17354955	intergenic	chr3L	17354955	17355379	424	0.459906
chr3L-17556966	intron	chr3L	17556966	17557169	203	0.477833
chr3L-17561669	intron	chr3L	17561669	17561876	207	0.454106
chr3L-17704919	intron	chr3L	17704919	17705133	214	0.369159
chr3L-18302173	intergenic	chr3L	18302173	18302477	304	0.414474
chr3L-18308226	intergenic	chr3L	18308226	18308447	221	0.466063
chr3L-18330197	intergenic	chr3L	18330197	18330405	208	0.394231
chr3L-18337055	intergenic	chr3L	18337055	18337270	215	0.465116
chr3L-18357375	intergenic	chr3L	18357375	18357594	219	0.456621
chr3L-18381347	intergenic	chr3L	18381347	18381549	202	0.480198
chr3L-18398737	intergenic	chr3L	18398737	18398982	245	0.522449
chr3L-18402447	intergenic	chr3L	18402447	18402674	227	0.352423
chr3L-18694749	intergenic	chr3L	18694749	18694956	207	0.516908
chr3L-18706592	intergenic	chr3L	18706592	18707248	656	0.352134
chr3L-19099012	intergenic	chr3L	19099012	19099245	233	0.283262
chr3L-19102251	intron	chr3L	19102251	19102588	337	0.507418
chr3L-19127181	intron	chr3L	19127181	19127389	208	0.403846
chr3L-19158379	intron	chr3L	19158379	19158591	212	0.400943
chr3L-19196773	intron	chr3L	19196773	19197044	271	0.461255
chr3L-19413987	intergenic	chr3L	19413987	19414239	252	0.329365
chr3L-19433306	intergenic	chr3L	19433306	19433539	233	0.493562
chr3L-19737980	intron	chr3L	19737980	19738214	234	0.448718
chr3L-20564918	intergenic	chr3L	20564918	20565128	210	0.409524
chr3L-20570383	intergenic	chr3L	20570383	20570616	233	0.369099
chr3L-20575295	intergenic	chr3L	20575295	20575511	216	0.509259
chr3L-20582095	intergenic	chr3L	20582095	20582340	245	0.542857
chr3L-20583791	intergenic	chr3L	20583791	20584059	268	0.458955
chr3L-20601818	intron	chr3L	20601818	20602023	205	0.434146
chr3L-20603398	intron	chr3L	20603398	20603608	210	0.57619
chr3L-20623113	intergenic	chr3L	20623113	20623415	302	0.440397
chr3L-20624415	intergenic	chr3L	20624415	20624674	259	0.393822
chr3L-20627926	intergenic	chr3L	20627926	20628172	246	0.434959
chr3L-20655279	intergenic	chr3L	20655279	20655506	227	0.38326
chr3L-20658846	intergenic	chr3L	20658846	20659062	216	0.425926
chr3L-20673055	intergenic	chr3L	20673055	20673391	336	0.389881
chr3L-20679825	intergenic	chr3L	20679825	20680035	210	0.519048
chr3L-20694951	intergenic	chr3L	20694951	20695155	204	0.45098
chr3L-20915558	intergenic	chr3L	20915558	20915795	237	0.438819
chr3L-20930741	intron	chr3L	20930741	20931025	284	0.457746
chr3L-20973148	intergenic	chr3L	20973148	20973379	231	0.415584
chr3L-20979796	intergenic	chr3L	20979796	20980008	212	0.481132
chr3L-21101066	intron	chr3L	21101066	21101278	212	0.367925
chr3L-21102900	intron	chr3L	21102900	21103118	218	0.43578
chr3L-21110930	intron	chr3L	21110930	21111142	212	0.443396
chr3L-2136396	intron	chr3L	2136396	2136678	282	0.41844
chr3L-21441624	intergenic	chr3L	21441624	21441858	234	0.465812
chr3L-21454477	intergenic	chr3L	21454477	21454765	288	0.336806
chr3L-21586656	intron	chr3L	21586656	21586909	253	0.454545
chr3L-21589351	intron	chr3L	21589351	21589669	318	0.537736
chr3L-21591541	intron	chr3L	21591541	21591747	206	0.601942
chr3L-21593981	intron	chr3L	21593981	21594215	234	0.457265
chr3L-21599644	intron	chr3L	21599644	21599853	209	0.392345
chr3L-21644317	intron	chr3L	21644317	21644518	201	0.487562
chr3L-21647269	intron	chr3L	21647269	21647556	287	0.372822
chr3L-21662062	intergenic	chr3L	21662062	21662265	203	0.433498
chr3L-21691699	intron	chr3L	21691699	21691944	245	0.481633
chr3L-21707466	intergenic	chr3L	21707466	21707669	203	0.536946
chr3L-21712228	intergenic	chr3L	21712228	21712462	234	0.457265
chr3L-21779336	intergenic	chr3L	21779336	21779536	200	0.365
chr3L-21782674	intergenic	chr3L	21782674	21782913	239	0.485356
chr3L-21783458	intergenic	chr3L	21783458	21783660	202	0.539604
chr3L-21784762	intergenic	chr3L	21784762	21785034	272	0.514706
chr3L-21788627	intergenic	chr3L	21788627	21788896	269	0.516729
chr3L-21795878	intergenic	chr3L	21795878	21796124	246	0.455285
chr3L-21804725	intron	chr3L	21804725	21804930	205	0.492683
chr3L-21812516	intergenic	chr3L	21812516	21812770	254	0.366142
chr3L-21886877	intron	chr3L	21886877	21887127	250	0.484
chr3L-22092212	intergenic	chr3L	22092212	22092444	232	0.512931
chr3L-22135364	intron	chr3L	22135364	22135592	228	0.508772
chr3L-22137994	intron	chr3L	22137994	22138206	212	0.415094
chr3L-22139704	intron	chr3L	22139704	22139920	216	0.49537
chr3L-22174775	intron	chr3L	22174775	22174983	208	0.543269
chr3L-22181120	intron	chr3L	22181120	22181338	218	0.472477
chr3L-22196171	intron	chr3L	22196171	22196385	214	0.46729
chr3L-22232545	intron	chr3L	22232545	22232762	217	0.456221
chr3L-22295524	intron	chr3L	22295524	22295733	209	0.263158
chr3L-22364591	intron	chr3L	22364591	22364843	252	0.43254
chr3L-22434519	intergenic	chr3L	22434519	22434794	275	0.461818
chr3L-22553040	intergenic	chr3L	22553040	22553412	372	0.357527
chr3L-22561492	intergenic	chr3L	22561492	22561776	284	0.450704
chr3L-22567174	intergenic	chr3L	22567174	22567400	226	0.39823
chr3L-22651145	intergenic	chr3L	22651145	22651361	216	0.388889
chr3L-22941194	intron	chr3L	22941194	22941414	220	0.477273
chr3L-23240099	intron	chr3L	23240099	23240299	200	0.365
chr3L-2762008	intron	chr3L	2762008	2762220	212	0.5
chr3L-2823735	intron	chr3L	2823735	2823943	208	0.475962
chr3L-2926653	intron	chr3L	2926653	2927064	411	0.377129
chr3L-3151815	intron	chr3L	3151815	3152080	265	0.358491
chr3L-3252699	intergenic	chr3L	3252699	3252932	233	0.459227
chr3L-3387730	intergenic	chr3L	3387730	3387999	269	0.349442
chr3L-3393873	intergenic	chr3L	3393873	3394261	388	0.471649
chr3L-3432917	intron	chr3L	3432917	3433137	220	0.436364
chr3L-3473098	intron	chr3L	3473098	3473300	202	0.435644
chr3L-3667897	intergenic	chr3L	3667897	3668178	281	0.437722
chr3L-3671704	intergenic	chr3L	3671704	3671931	227	0.400881
chr3L-3696923	intergenic	chr3L	3696923	3697227	304	0.398026
chr3L-3705560	intergenic	chr3L	3705560	3705763	203	0.428571
chr3L-3711328	intergenic	chr3L	3711328	3711773	445	0.440449
chr3L-3877150	intergenic	chr3L	3877150	3877407	257	0.424125
chr3L-390013	intron	chr3L	390013	390217	204	0.465686
chr3L-3965629	intergenic	chr3L	3965629	3965842	213	0.488263
chr3L-3995253	intergenic	chr3L	3995253	3995481	228	0.434211
chr3L-3998197	intergenic	chr3L	3998197	3998412	215	0.539535
chr3L-4008346	intergenic	chr3L	4008346	4008589	243	0.469136
chr3L-4178535	intron	chr3L	4178535	4178800	265	0.279245
chr3L-4451514	intergenic	chr3L	4451514	4451743	229	0.375546
chr3L-4516134	intron	chr3L	4516134	4516337	203	0.448276
chr3L-4620133	intron	chr3L	4620133	4620348	215	0.511628
chr3L-4676248	intron	chr3L	4676248	4676566	318	0.424528
chr3L-4770376	intron	chr3L	4770376	4770612	236	0.495763
chr3L-4869574	intron	chr3L	4869574	4869778	204	0.416667
chr3L-4919441	intergenic	chr3L	4919441	4919671	230	0.478261
chr3L-4944797	intron	chr3L	4944797	4945022	225	0.36
chr3L-5157894	intron	chr3L	5157894	5158113	219	0.319635
chr3L-5282949	intergenic	chr3L	5282949	5283183	234	0.504274
chr3L-5379204	intergenic	chr3L	5379204	5379410	206	0.451456
chr3L-5393001	intergenic	chr3L	5393001	5393243	242	0.421488
chr3L-5412785	intergenic	chr3L	5412785	5413077	292	0.476027
chr3L-5602451	intergenic	chr3L	5602451	5602664	213	0.403756
chr3L-5606024	intergenic	chr3L	5606024	5606243	219	0.424658
chr3L-5825076	intron	chr3L	5825076	5825293	217	0.483871
chr3L-5827608	intron	chr3L	5827608	5827841	233	0.493562
chr3L-5831281	intron	chr3L	5831281	5831568	287	0.494774
chr3L-5838815	intergenic	chr3L	5838815	5839086	271	0.420664
chr3L-5845348	intergenic	chr3L	5845348	5845596	248	0.46371
chr3L-5859024	intergenic	chr3L	5859024	5859228	204	0.519608
chr3L-5878061	intergenic	chr3L	5878061	5878334	273	0.494505
chr3L-5948083	intergenic	chr3L	5948083	5948334	251	0.466135
chr3L-5965620	intron	chr3L	5965620	5965903	283	0.416961
chr3L-608207	intergenic	chr3L	608207	608467	260	0.415385
chr3L-6131871	intergenic	chr3L	6131871	6132075	204	0.372549
chr3L-6267241	intergenic	chr3L	6267241	6267482	241	0.419087
chr3L-6271785	intergenic	chr3L	6271785	6272006	221	0.479638
chr3L-6279279	intergenic	chr3L	6279279	6279527	248	0.439516
chr3L-6290105	intergenic	chr3L	6290105	6290317	212	0.476415
chr3L-6331253	intron	chr3L	6331253	6331463	210	0.404762
chr3L-6347728	intergenic	chr3L	6347728	6347962	234	0.470085
chr3L-6348665	intergenic	chr3L	6348665	6348928	263	0.51711
chr3L-6353142	intergenic	chr3L	6353142	6353344	202	0.509901
chr3L-6354164	intergenic	chr3L	6354164	6354525	361	0.404432
chr3L-6388580	intergenic	chr3L	6388580	6388799	219	0.378995
chr3L-6426142	intron	chr3L	6426142	6426364	222	0.504505
chr3L-6434839	intron	chr3L	6434839	6435072	233	0.454936
chr3L-6441384	intron	chr3L	6441384	6441633	249	0.526104
chr3L-6445809	intron	chr3L	6445809	6446038	229	0.393013
chr3L-6448940	intron	chr3L	6448940	6449150	210	0.485714
chr3L-6452278	intron	chr3L	6452278	6452500	222	0.418919
chr3L-6614128	intergenic	chr3L	6614128	6614329	201	0.432836
chr3L-662026	intergenic	chr3L	662026	662301	275	0.483636
chr3L-6623150	intron	chr3L	6623150	6623354	204	0.436274
chr3L-6655263	intergenic	chr3L	6655263	6655463	200	0.37
chr3L-6659401	intergenic	chr3L	6659401	6659681	280	0.389286
chr3L-6673909	intergenic	chr3L	6673909	6674166	257	0.361868
chr3L-6718575	intergenic	chr3L	6718575	6718797	222	0.36036
chr3L-676524	intergenic	chr3L	676524	676724	200	0.465
chr3L-6767868	intergenic	chr3L	6767868	6768086	218	0.399083
chr3L-6776454	intergenic	chr3L	6776454	6776795	341	0.43695
chr3L-6778960	intergenic	chr3L	6778960	6779165	205	0.453659
chr3L-6797412	intergenic	chr3L	6797412	6797614	202	0.356436
chr3L-6799863	intergenic	chr3L	6799863	6800120	257	0.424125
chr3L-6802954	intergenic	chr3L	6802954	6803187	233	0.476395
chr3L-6805167	intergenic	chr3L	6805167	6805381	214	0.425234
chr3L-6815725	intergenic	chr3L	6815725	6815953	228	0.416667
chr3L-6817332	intergenic	chr3L	6817332	6817552	220	0.568182
chr3L-6821825	intergenic	chr3L	6821825	6822064	239	0.535565
chr3L-6829244	intergenic	chr3L	6829244	6829482	238	0.428571
chr3L-6831212	intergenic	chr3L	6831212	6831586	374	0.435829
chr3L-6888564	intergenic	chr3L	6888564	6888768	204	0.5
chr3L-6914447	intergenic	chr3L	6914447	6914703	256	0.394531
chr3L-6921352	intergenic	chr3L	6921352	6921558	206	0.466019
chr3L-6921803	intergenic	chr3L	6921803	6922026	223	0.475336
chr3L-7030453	intron	chr3L	7030453	7030691	238	0.445378
chr3L-7130783	intron	chr3L	7130783	7131044	261	0.471264
chr3L-7209315	intergenic	chr3L	7209315	7209531	216	0.402778
chr3L-7276966	intron	chr3L	7276966	7277181	215	0.437209
chr3L-729592	intergenic	chr3L	729592	729866	274	0.437956
chr3L-740795	intron	chr3L	740795	741007	212	0.40566
chr3L-7538271	intergenic	chr3L	7538271	7538474	203	0.394089
chr3L-7541481	intergenic	chr3L	7541481	7541684	203	0.428571
chr3L-7548176	intergenic	chr3L	7548176	7548433	257	0.455253
chr3L-755046	intron	chr3L	755046	755286	240	0.504167
chr3L-7566523	intergenic	chr3L	7566523	7566777	254	0.397638
chr3L-7567148	intergenic	chr3L	7567148	7567372	224	0.410714
chr3L-7573918	intergenic	chr3L	7573918	7574121	203	0.403941
chr3L-7695561	intron	chr3L	7695561	7695907	346	0.297688
chr3L-786026	intergenic	chr3L	786026	786266	240	0.616667
chr3L-788846	intergenic	chr3L	788846	789087	241	0.406639
chr3L-790927	intergenic	chr3L	790927	791197	270	0.437037
chr3L-791585	intergenic	chr3L	791585	791786	201	0.462687
chr3L-807028	intergenic	chr3L	807028	807380	352	0.494318
chr3L-8236222	intron	chr3L	8236222	8236439	217	0.451613
chr3L-8446526	intron	chr3L	8446526	8446747	221	0.375566
chr3L-8490726	intron	chr3L	8490726	8490950	224	0.486607
chr3L-8499712	intron	chr3L	8499712	8499950	238	0.415966
chr3L-8744891	intergenic	chr3L	8744891	8745099	208	0.495192
chr3L-8751599	intron	chr3L	8751599	8751806	207	0.444444
chr3L-9024007	intergenic	chr3L	9024007	9024219	212	0.514151
chr3L-9038781	intergenic	chr3L	9038781	9038987	206	0.466019
chr3L-9145776	intron	chr3L	9145776	9145992	216	0.375
chr3L-9193847	intergenic	chr3L	9193847	9194064	217	0.479263
chr3L-919820	intron	chr3L	919820	920038	218	0.458716
chr3L-9210664	intergenic	chr3L	9210664	9210891	227	0.480176
chr3L-9242835	intergenic	chr3L	9242835	9243154	319	0.492163
chr3L-9272844	intron	chr3L	9272844	9273048	204	0.382353
chr3L-9276626	intron	chr3L	9276626	9276860	234	0.440171
chr3L-9283429	intergenic	chr3L	9283429	9283629	200	0.53
chr3L-931335	intron	chr3L	931335	931536	201	0.338308
chr3L-9596144	intergenic	chr3L	9596144	9596366	222	0.45045
chr3L-9869521	intergenic	chr3L	9869521	9869726	205	0.395122
chr3L-9986124	intron	chr3L	9986124	9986342	218	0.550459
chr3R-10209666	intergenic	chr3R	10209666	10209893	227	0.427313
chr3R-10212407	intergenic	chr3R	10212407	10212665	258	0.395349
chr3R-10249784	intron	chr3R	10249784	10250098	314	0.458599
chr3R-10268005	intron	chr3R	10268005	10268245	240	0.475
chr3R-10275833	intron	chr3R	10275833	10276049	216	0.407407
chr3R-10286353	intron	chr3R	10286353	10286553	200	0.375
chr3R-10291565	intron	chr3R	10291565	10291809	244	0.336066
chr3R-10294150	intron	chr3R	10294150	10294366	216	0.453704
chr3R-10310060	intergenic	chr3R	10310060	10310267	207	0.449275
chr3R-10314238	intergenic	chr3R	10314238	10314454	216	0.537037
chr3R-10324905	intron	chr3R	10324905	10325107	202	0.470297
chr3R-10457515	intron	chr3R	10457515	10457730	215	0.548837
chr3R-10540776	intron	chr3R	10540776	10540984	208	0.423077
chr3R-10601477	intron	chr3R	10601477	10601708	231	0.359307
chr3R-10605783	intron	chr3R	10605783	10605989	206	0.364078
chr3R-10823439	intergenic	chr3R	10823439	10823726	287	0.397213
chr3R-10856209	intergenic	chr3R	10856209	10856480	271	0.516605
chr3R-10931197	intron	chr3R	10931197	10931397	200	0.38
chr3R-10955002	intron	chr3R	10955002	10955230	228	0.469298
chr3R-11119616	intron	chr3R	11119616	11119820	204	0.436274
chr3R-11255501	intron	chr3R	11255501	11255721	220	0.390909
chr3R-11448624	intergenic	chr3R	11448624	11448912	288	0.364583
chr3R-11495061	intron	chr3R	11495061	11495295	234	0.410256
chr3R-11848251	intergenic	chr3R	11848251	11848451	200	0.5
chr3R-11937991	intergenic	chr3R	11937991	11938200	209	0.4689
chr3R-11946119	intergenic	chr3R	11946119	11946418	299	0.538462
chr3R-11951267	intergenic	chr3R	11951267	11951474	207	0.468599
chr3R-12040095	intergenic	chr3R	12040095	12040302	207	0.521739
chr3R-12047259	intergenic	chr3R	12047259	12047540	281	0.466192
chr3R-12049917	intergenic	chr3R	12049917	12050127	210	0.542857
chr3R-12061295	intron	chr3R	12061295	12061496	201	0.457711
chr3R-12063120	intron	chr3R	12063120	12063361	241	0.431535
chr3R-12066770	intron	chr3R	12066770	12066980	210	0.442857
chr3R-12067038	intron	chr3R	12067038	12067300	262	0.492366
chr3R-12075573	intron	chr3R	12075573	12075786	213	0.464789
chr3R-12077572	intron	chr3R	12077572	12077777	205	0.492683
chr3R-12114519	intron	chr3R	12114519	12114727	208	0.533654
chr3R-12330372	intron	chr3R	12330372	12330637	265	0.460377
chr3R-12355009	intron	chr3R	12355009	12355221	212	0.419811
chr3R-12389129	intron	chr3R	12389129	12389336	207	0.458937
chr3R-12494298	intron	chr3R	12494298	12494524	226	0.433628
chr3R-12506626	intron	chr3R	12506626	12506836	210	0.409524
chr3R-12507627	intron	chr3R	12507627	12507888	261	0.475096
chr3R-12511499	intron	chr3R	12511499	12511713	214	0.425234
chr3R-12512144	intron	chr3R	12512144	12512347	203	0.433498
chr3R-12518264	intron	chr3R	12518264	12518493	229	0.436681
chr3R-12519676	intron	chr3R	12519676	12519899	223	0.488789
chr3R-12521109	intron	chr3R	12521109	12521344	235	0.489362
chr3R-12523608	intron	chr3R	12523608	12524033	425	0.395294
chr3R-12531026	intron	chr3R	12531026	12531251	225	0.422222
chr3R-12534921	intron	chr3R	12534921	12535205	284	0.415493
chr3R-12535743	intron	chr3R	12535743	12535961	218	0.408257
chr3R-12539959	intron	chr3R	12539959	12540234	275	0.450909
chr3R-12543349	intron	chr3R	12543349	12543585	236	0.487288
chr3R-12544877	intron	chr3R	12544877	12545095	218	0.422018
chr3R-12548396	intron	chr3R	12548396	12548671	275	0.483636
chr3R-12561690	intergenic	chr3R	12561690	12561900	210	0.452381
chr3R-12563960	intergenic	chr3R	12563960	12564162	202	0.460396
chr3R-12564834	intergenic	chr3R	12564834	12565034	200	0.27
chr3R-12568896	intron	chr3R	12568896	12569130	234	0.380342
chr3R-12569290	intron	chr3R	12569290	12569587	297	0.447811
chr3R-12573625	intron	chr3R	12573625	12573828	203	0.448276
chr3R-12575805	intron	chr3R	12575805	12576032	227	0.471366
chr3R-12637468	intron	chr3R	12637468	12637709	241	0.53527
chr3R-12638921	intron	chr3R	12638921	12639154	233	0.339056
chr3R-12732780	intron	chr3R	12732780	12732994	214	0.481308
chr3R-12771452	intron	chr3R	12771452	12771687	235	0.429787
chr3R-12780127	intron	chr3R	12780127	12780335	208	0.399038
chr3R-12878310	intergenic	chr3R	12878310	12878535	225	0.497778
chr3R-12881949	intron	chr3R	12881949	12882165	216	0.509259
chr3R-12887616	intron	chr3R	12887616	12887816	200	0.535
chr3R-12892554	intron	chr3R	12892554	12892773	219	0.584475
chr3R-12998092	intron	chr3R	12998092	12998299	207	0.47343
chr3R-13056846	intergenic	chr3R	13056846	13057110	264	0.545455
chr3R-13136245	intergenic	chr3R	13136245	13136457	212	0.466981
chr3R-13187076	intron	chr3R	13187076	13187282	206	0.470874
chr3R-13190706	intron	chr3R	13190706	13190943	237	0.417722
chr3R-13192965	intergenic	chr3R	13192965	13193221	256	0.429688
chr3R-13194294	intergenic	chr3R	13194294	13194508	214	0.406542
chr3R-13194906	intergenic	chr3R	13194906	13195119	213	0.43662
chr3R-13249152	intergenic	chr3R	13249152	13249452	300	0.413333
chr3R-13346335	intergenic	chr3R	13346335	13346592	257	0.428016
chr3R-13434780	intergenic	chr3R	13434780	13435066	286	0.472028
chr3R-13452105	intergenic	chr3R	13452105	13452315	210	0.457143
chr3R-13457756	intergenic	chr3R	13457756	13458073	317	0.451104
chr3R-13458346	intergenic	chr3R	13458346	13458555	209	0.425837
chr3R-13461680	intergenic	chr3R	13461680	13461979	299	0.45485
chr3R-13614361	intron	chr3R	13614361	13614573	212	0.457547
chr3R-13619635	intron	chr3R	13619635	13619848	213	0.450704
chr3R-13781272	intron	chr3R	13781272	13781534	262	0.458015
chr3R-13910751	intergenic	chr3R	13910751	13910966	215	0.390698
chr3R-13971313	intergenic	chr3R	13971313	13971628	315	0.377778
chr3R-14165488	intron	chr3R	14165488	14165691	203	0.413793
chr3R-14291438	intron	chr3R	14291438	14291675	237	0.476793
chr3R-14302183	intron	chr3R	14302183	14302458	275	0.432727
chr3R-14322570	intron	chr3R	14322570	14322881	311	0.562701
chr3R-14325526	intron	chr3R	14325526	14325775	249	0.473896
chr3R-14351535	intron	chr3R	14351535	14351846	311	0.424437
chr3R-14862474	intron	chr3R	14862474	14862720	246	0.487805
chr3R-14881880	intron	chr3R	14881880	14882100	220	0.495455
chr3R-14906585	intron	chr3R	14906585	14906808	223	0.533632
chr3R-15077092	intergenic	chr3R	15077092	15077333	241	0.473029
chr3R-15086346	intergenic	chr3R	15086346	15086576	230	0.426087
chr3R-15099416	intergenic	chr3R	15099416	15099647	231	0.441558
chr3R-15100108	intergenic	chr3R	15100108	15100328	220	0.5
chr3R-15113316	intergenic	chr3R	15113316	15113522	206	0.485437
chr3R-15120741	intergenic	chr3R	15120741	15120955	214	0.415888
chr3R-15135984	intron	chr3R	15135984	15136211	227	0.422908
chr3R-15154232	intergenic	chr3R	15154232	15154438	206	0.383495
chr3R-15165787	intergenic	chr3R	15165787	15166022	235	0.438298
chr3R-15169148	intergenic	chr3R	15169148	15169355	207	0.429952
chr3R-15178996	intergenic	chr3R	15178996	15179196	200	0.43
chr3R-15191576	intergenic	chr3R	15191576	15191831	255	0.423529
chr3R-16183032	intergenic	chr3R	16183032	16183264	232	0.508621
chr3R-16198912	intergenic	chr3R	16198912	16199121	209	0.435407
chr3R-16249197	intron	chr3R	16249197	16249406	209	0.397129
chr3R-16283485	intron	chr3R	16283485	16283737	252	0.440476
chr3R-16555067	intergenic	chr3R	16555067	16555278	211	0.402844
chr3R-16600866	intron	chr3R	16600866	16601072	206	0.398058
chr3R-16627149	intron	chr3R	16627149	16627372	223	0.264574
chr3R-1695459	intron	chr3R	1695459	1695669	210	0.328571
chr3R-17106445	intron	chr3R	17106445	17106648	203	0.512315
chr3R-1713563	intron	chr3R	1713563	1713778	215	0.418605
chr3R-17152663	intron	chr3R	17152663	17152923	260	0.357692
chr3R-17168906	intron	chr3R	17168906	17169132	226	0.376106
chr3R-17169884	intron	chr3R	17169884	17170091	207	0.429952
chr3R-17244184	intron	chr3R	17244184	17244388	204	0.480392
chr3R-17254117	intron	chr3R	17254117	17254355	238	0.508403
chr3R-17293098	intergenic	chr3R	17293098	17293372	274	0.445255
chr3R-17300463	intergenic	chr3R	17300463	17300666	203	0.497537
chr3R-1730388	intron	chr3R	1730388	1730613	225	0.457778
chr3R-17355056	intergenic	chr3R	17355056	17355256	200	0.45
chr3R-17359649	intergenic	chr3R	17359649	17359899	250	0.48
chr3R-17392881	intergenic	chr3R	17392881	17393113	232	0.448276
chr3R-17510412	intron	chr3R	17510412	17510614	202	0.519802
chr3R-1751303	intron	chr3R	1751303	1751594	291	0.457045
chr3R-17520668	intron	chr3R	17520668	17520894	226	0.49115
chr3R-17536937	intron	chr3R	17536937	17537138	201	0.512438
chr3R-1757724	intron	chr3R	1757724	1757924	200	0.405
chr3R-17587956	intron	chr3R	17587956	17588329	373	0.327078
chr3R-17720704	intron	chr3R	17720704	17720907	203	0.320197
chr3R-17722018	intron	chr3R	17722018	17722245	227	0.471366
chr3R-17722334	intron	chr3R	17722334	17722558	224	0.459821
chr3R-17723554	intron	chr3R	17723554	17723771	217	0.516129
chr3R-17727797	intron	chr3R	17727797	17728010	213	0.446009
chr3R-17744038	intergenic	chr3R	17744038	17744420	382	0.418848
chr3R-17750935	intergenic	chr3R	17750935	17751138	203	0.428571
chr3R-1775168	intergenic	chr3R	1775168	1775388	220	0.413636
chr3R-17759994	intergenic	chr3R	17759994	17760197	203	0.453202
chr3R-17764994	intergenic	chr3R	17764994	17765225	231	0.480519
chr3R-17766821	intergenic	chr3R	17766821	17767025	204	0.558824
chr3R-17771694	intergenic	chr3R	17771694	17772054	360	0.408333
chr3R-17782387	intron	chr3R	17782387	17782695	308	0.49026
chr3R-17786117	intron	chr3R	17786117	17786409	292	0.321918
chr3R-1779035	intergenic	chr3R	1779035	1779236	201	0.422886
chr3R-17819965	intron	chr3R	17819965	17820166	201	0.537313
chr3R-1790284	intergenic	chr3R	1790284	1790487	203	0.448276
chr3R-17933372	intron	chr3R	17933372	17933582	210	0.280952
chr3R-1795454	intergenic	chr3R	1795454	1795701	247	0.522267
chr3R-17977214	intron	chr3R	17977214	17977533	319	0.501567
chr3R-17983810	intron	chr3R	17983810	17984118	308	0.532468
chr3R-17994665	intron	chr3R	17994665	17994866	201	0.348259
chr3R-1799690	intron	chr3R	1799690	1799903	213	0.464789
chr3R-18002277	intron	chr3R	18002277	18002511	234	0.42735
chr3R-18006129	intron	chr3R	18006129	18006392	263	0.467681
chr3R-1803669	intergenic	chr3R	1803669	1803903	234	0.410256
chr3R-1809023	intergenic	chr3R	1809023	1809300	277	0.476534
chr3R-18172398	intergenic	chr3R	18172398	18172652	254	0.452756
chr3R-18179455	intron	chr3R	18179455	18179711	256	0.410156
chr3R-18281766	intron	chr3R	18281766	18282004	238	0.386555
chr3R-18301481	intron	chr3R	18301481	18301703	222	0.378378
chr3R-18312484	intergenic	chr3R	18312484	18312701	217	0.221198
chr3R-18625913	intergenic	chr3R	18625913	18626144	231	0.506494
chr3R-18685297	intergenic	chr3R	18685297	18685540	243	0.386831
chr3R-18734509	intron	chr3R	18734509	18734748	239	0.41841
chr3R-1875799	intergenic	chr3R	1875799	1876028	229	0.449782
chr3R-18805293	intergenic	chr3R	18805293	18805497	204	0.441176
chr3R-18811075	intron	chr3R	18811075	18811289	214	0.528037
chr3R-18957886	intron	chr3R	18957886	18958104	218	0.486239
chr3R-18972493	intergenic	chr3R	18972493	18972766	273	0.516484
chr3R-18972801	intergenic	chr3R	18972801	18973085	284	0.485915
chr3R-18974623	intergenic	chr3R	18974623	18974839	216	0.532407
chr3R-18975034	intergenic	chr3R	18975034	18975286	252	0.472222
chr3R-1899523	intergenic	chr3R	1899523	1899748	225	0.404444
chr3R-1908486	intergenic	chr3R	1908486	1908701	215	0.44186
chr3R-19103303	intron	chr3R	19103303	19103539	236	0.38983
chr3R-1910903	intergenic	chr3R	1910903	1911142	239	0.51046
chr3R-19193731	intergenic	chr3R	19193731	19193936	205	0.521951
chr3R-19242624	intron	chr3R	19242624	19242925	301	0.501661
chr3R-19244698	intron	chr3R	19244698	19245042	344	0.438953
chr3R-19245861	intron	chr3R	19245861	19246104	243	0.378601
chr3R-19252370	intron	chr3R	19252370	19252649	279	0.455197
chr3R-19253611	intron	chr3R	19253611	19253887	276	0.384058
chr3R-19258153	intron	chr3R	19258153	19258390	237	0.468354
chr3R-19259997	intron	chr3R	19259997	19260200	203	0.428571
chr3R-19260221	intron	chr3R	19260221	19260475	254	0.42126
chr3R-19269265	intron	chr3R	19269265	19269465	200	0.43
chr3R-19276276	intron	chr3R	19276276	19276515	239	0.401674
chr3R-19278276	intron	chr3R	19278276	19278524	248	0.423387
chr3R-19280454	intron	chr3R	19280454	19280659	205	0.35122
chr3R-19283834	intron	chr3R	19283834	19284120	286	0.433566
chr3R-19284313	intron	chr3R	19284313	19284542	229	0.454148
chr3R-19284570	intron	chr3R	19284570	19284791	221	0.497738
chr3R-19288470	intron	chr3R	19288470	19288701	231	0.471861
chr3R-19294569	intron	chr3R	19294569	19294808	239	0.456067
chr3R-19302519	intergenic	chr3R	19302519	19302773	254	0.452756
chr3R-19305947	intergenic	chr3R	19305947	19306215	268	0.447761
chr3R-1930610	intergenic	chr3R	1930610	1930846	236	0.38983
chr3R-19306538	intergenic	chr3R	19306538	19306752	214	0.420561
chr3R-19316106	intergenic	chr3R	19316106	19316320	214	0.401869
chr3R-19316697	intergenic	chr3R	19316697	19316936	239	0.426778
chr3R-19317261	intergenic	chr3R	19317261	19317474	213	0.389671
chr3R-19318851	intergenic	chr3R	19318851	19319122	271	0.494465
chr3R-19321034	intergenic	chr3R	19321034	19321241	207	0.487923
chr3R-19322496	intergenic	chr3R	19322496	19322717	221	0.447964
chr3R-19325748	intergenic	chr3R	19325748	19326030	282	0.492908
chr3R-19329953	intergenic	chr3R	19329953	19330164	211	0.563981
chr3R-19333399	intergenic	chr3R	19333399	19333745	346	0.424856
chr3R-19334555	intergenic	chr3R	19334555	19334792	237	0.443038
chr3R-19338505	intergenic	chr3R	19338505	19338735	230	0.534783
chr3R-1941120	intergenic	chr3R	1941120	1941334	214	0.448598
chr3R-19438814	intron	chr3R	19438814	19439014	200	0.47
chr3R-19448511	intron	chr3R	19448511	19448724	213	0.535211
chr3R-19484727	intron	chr3R	19484727	19485035	308	0.36039
chr3R-19652473	intron	chr3R	19652473	19652674	201	0.472637
chr3R-1970803	intergenic	chr3R	1970803	1971008	205	0.473171
chr3R-20255063	intron	chr3R	20255063	20255283	220	0.522727
chr3R-20293296	intergenic	chr3R	20293296	20293525	229	0.480349
chr3R-20414291	intron	chr3R	20414291	20414529	238	0.407563
chr3R-20436454	intron	chr3R	20436454	20436682	228	0.399123
chr3R-20509159	intron	chr3R	20509159	20509466	307	0.355049
chr3R-20509680	intron	chr3R	20509680	20509927	247	0.291498
chr3R-20512143	intron	chr3R	20512143	20512445	302	0.278146
chr3R-20519605	intron	chr3R	20519605	20519866	261	0.287356
chr3R-20732662	intergenic	chr3R	20732662	20732953	291	0.560137
chr3R-20736878	intergenic	chr3R	20736878	20737109	231	0.406926
chr3R-20781908	intergenic	chr3R	20781908	20782204	296	0.516892
chr3R-20796271	intergenic	chr3R	20796271	20796477	206	0.529126
chr3R-20797746	intergenic	chr3R	20797746	20797965	219	0.497717
chr3R-20902745	intergenic	chr3R	20902745	20902999	254	0.472441
chr3R-20903183	intergenic	chr3R	20903183	20903393	210	0.419048
chr3R-20915782	intergenic	chr3R	20915782	20915985	203	0.463054
chr3R-20916288	intergenic	chr3R	20916288	20916684	396	0.489899
chr3R-20922075	intergenic	chr3R	20922075	20922287	212	0.382075
chr3R-20966392	intergenic	chr3R	20966392	20966592	200	0.52
chr3R-20976967	intergenic	chr3R	20976967	20977250	283	0.526502
chr3R-20977737	intergenic	chr3R	20977737	20977947	210	0.552381
chr3R-20987061	intergenic	chr3R	20987061	20987281	220	0.509091
chr3R-20991424	intergenic	chr3R	20991424	20991660	236	0.457627
chr3R-20994264	intergenic	chr3R	20994264	20994464	200	0.505
chr3R-21020515	intergenic	chr3R	21020515	21020724	209	0.4689
chr3R-21031227	intron	chr3R	21031227	21031466	239	0.435146
chr3R-2103295	intergenic	chr3R	2103295	2103570	275	0.429091
chr3R-2126773	intergenic	chr3R	2126773	2127040	267	0.426966
chr3R-21380442	intron	chr3R	21380442	21380648	206	0.383495
chr3R-21579317	intron	chr3R	21579317	21579579	262	0.465649
chr3R-21825106	intergenic	chr3R	21825106	21825469	363	0.545455
chr3R-21838800	intergenic	chr3R	21838800	21839004	204	0.406863
chr3R-21858129	intergenic	chr3R	21858129	21858347	218	0.472477
chr3R-21861953	intergenic	chr3R	21861953	21862224	271	0.520295
chr3R-21865533	intergenic	chr3R	21865533	21865819	286	0.475524
chr3R-21890254	intergenic	chr3R	21890254	21890479	225	0.431111
chr3R-21890963	intergenic	chr3R	21890963	21891214	251	0.426295
chr3R-21894672	intergenic	chr3R	21894672	21894934	262	0.473282
chr3R-21895522	intergenic	chr3R	21895522	21895735	213	0.474178
chr3R-21899568	intergenic	chr3R	21899568	21899813	245	0.453061
chr3R-21908209	intron	chr3R	21908209	21908440	231	0.419913
chr3R-21909353	intron	chr3R	21909353	21909582	229	0.41048
chr3R-21910394	intron	chr3R	21910394	21910658	264	0.488636
chr3R-21911082	intron	chr3R	21911082	21911685	603	0.439469
chr3R-21923409	intron	chr3R	21923409	21923619	210	0.419048
chr3R-21928465	intergenic	chr3R	21928465	21928760	295	0.440678
chr3R-21984568	intergenic	chr3R	21984568	21984930	362	0.461326
chr3R-22193962	intergenic	chr3R	22193962	22194211	249	0.493976
chr3R-22220060	intergenic	chr3R	22220060	22220263	203	0.37931
chr3R-22222120	intergenic	chr3R	22222120	22222361	241	0.497925
chr3R-22225550	intergenic	chr3R	22225550	22225750	200	0.4
chr3R-22230742	intergenic	chr3R	22230742	22231001	259	0.401544
chr3R-22249035	intergenic	chr3R	22249035	22249312	277	0.487365
chr3R-22250042	intergenic	chr3R	22250042	22250252	210	0.52381
chr3R-22259478	intergenic	chr3R	22259478	22259764	286	0.472028
chr3R-22325522	intron	chr3R	22325522	22325730	208	0.423077
chr3R-22369454	intron	chr3R	22369454	22369675	221	0.420814
chr3R-22419329	intron	chr3R	22419329	22419607	278	0.363309
chr3R-22419908	intron	chr3R	22419908	22420194	286	0.339161
chr3R-22443797	intergenic	chr3R	22443797	22444031	234	0.435897
chr3R-22458778	intergenic	chr3R	22458778	22459184	406	0.371921
chr3R-22469863	intergenic	chr3R	22469863	22470076	213	0.507042
chr3R-22470568	intergenic	chr3R	22470568	22470781	213	0.42723
chr3R-22475691	intron	chr3R	22475691	22475897	206	0.538835
chr3R-22493468	intron	chr3R	22493468	22493722	254	0.448819
chr3R-22497305	intron	chr3R	22497305	22497537	232	0.573276
chr3R-22602223	intergenic	chr3R	22602223	22602487	264	0.549242
chr3R-22604783	intergenic	chr3R	22604783	22605029	246	0.495935
chr3R-22622429	intergenic	chr3R	22622429	22622653	224	0.419643
chr3R-22676439	intron	chr3R	22676439	22676669	230	0.426087
chr3R-2288071	intergenic	chr3R	2288071	2288361	290	0.396552
chr3R-22900235	intergenic	chr3R	22900235	22900453	218	0.412844
chr3R-22994248	intergenic	chr3R	22994248	22994461	213	0.492958
chr3R-23001249	intron	chr3R	23001249	23001473	224	0.508929
chr3R-23026932	intergenic	chr3R	23026932	23027155	223	0.529148
chr3R-23029408	intergenic	chr3R	23029408	23029777	369	0.485095
chr3R-23036980	intergenic	chr3R	23036980	23037202	222	0.463964
chr3R-23042094	intergenic	chr3R	23042094	23042337	243	0.395062
chr3R-23049174	intergenic	chr3R	23049174	23049376	202	0.415842
chr3R-23050726	intergenic	chr3R	23050726	23050999	273	0.450549
chr3R-23167326	intron	chr3R	23167326	23167528	202	0.430693
chr3R-23191696	intron	chr3R	23191696	23191918	222	0.355856
chr3R-23337686	intergenic	chr3R	23337686	23337952	266	0.428571
chr3R-23547870	intergenic	chr3R	23547870	23548106	236	0.40678
chr3R-23639782	intron	chr3R	23639782	23640012	230	0.469565
chr3R-23666503	intron	chr3R	23666503	23666728	225	0.373333
chr3R-23686583	intron	chr3R	23686583	23686806	223	0.443946
chr3R-23844277	intergenic	chr3R	23844277	23844478	201	0.487562
chr3R-23873917	intron	chr3R	23873917	23874150	233	0.472103
chr3R-23876616	intron	chr3R	23876616	23876841	225	0.417778
chr3R-23884888	intron	chr3R	23884888	23885112	224	0.424107
chr3R-23891860	intron	chr3R	23891860	23892096	236	0.457627
chr3R-23892370	intron	chr3R	23892370	23892570	200	0.52
chr3R-23903060	intron	chr3R	23903060	23903361	301	0.524917
chr3R-23919824	intergenic	chr3R	23919824	23920102	278	0.503597
chr3R-23920900	intergenic	chr3R	23920900	23921124	224	0.473214
chr3R-23924444	intergenic	chr3R	23924444	23924685	241	0.443983
chr3R-23942101	intergenic	chr3R	23942101	23942351	250	0.444
chr3R-23946660	intergenic	chr3R	23946660	23946884	224	0.392857
chr3R-23967546	intergenic	chr3R	23967546	23967818	272	0.4375
chr3R-23978195	intron	chr3R	23978195	23978432	237	0.417722
chr3R-24005543	intron	chr3R	24005543	24005748	205	0.336585
chr3R-24017763	intron	chr3R	24017763	24018047	284	0.454225
chr3R-24032586	intron	chr3R	24032586	24032801	215	0.460465
chr3R-24047533	intron	chr3R	24047533	24047794	261	0.444444
chr3R-24049519	intron	chr3R	24049519	24049792	273	0.358974
chr3R-24054245	intron	chr3R	24054245	24054530	285	0.424561
chr3R-24057010	intron	chr3R	24057010	24057219	209	0.435407
chr3R-24067575	intergenic	chr3R	24067575	24067776	201	0.427861
chr3R-24071509	intergenic	chr3R	24071509	24071720	211	0.483412
chr3R-24076101	intergenic	chr3R	24076101	24076314	213	0.483568
chr3R-24126520	intergenic	chr3R	24126520	24126727	207	0.478261
chr3R-24137355	intergenic	chr3R	24137355	24137562	207	0.36715
chr3R-24183626	intergenic	chr3R	24183626	24183869	243	0.407407
chr3R-24190102	intergenic	chr3R	24190102	24190389	287	0.432056
chr3R-24219849	intergenic	chr3R	24219849	24220115	266	0.477444
chr3R-24226805	intergenic	chr3R	24226805	24227017	212	0.377358
chr3R-24230783	intergenic	chr3R	24230783	24231007	224	0.508929
chr3R-24231718	intergenic	chr3R	24231718	24231928	210	0.433333
chr3R-24238120	intergenic	chr3R	24238120	24238484	364	0.456044
chr3R-24238816	intergenic	chr3R	24238816	24239033	217	0.451613
chr3R-24250493	intron	chr3R	24250493	24250703	210	0.428571
chr3R-24255844	intron	chr3R	24255844	24256048	204	0.431373
chr3R-24260396	intron	chr3R	24260396	24260672	276	0.423913
chr3R-24261804	intron	chr3R	24261804	24262049	245	0.436735
chr3R-24277803	intron	chr3R	24277803	24278057	254	0.374016
chr3R-24291154	intron	chr3R	24291154	24291415	261	0.344828
chr3R-24294755	intron	chr3R	24294755	24294964	209	0.4689
chr3R-2430334	intergenic	chr3R	2430334	2430541	207	0.478261
chr3R-24316296	intron	chr3R	24316296	24316540	244	0.47541
chr3R-24323177	intron	chr3R	24323177	24323401	224	0.415179
chr3R-24339497	intron	chr3R	24339497	24339803	306	0.473856
chr3R-24341625	intron	chr3R	24341625	24341873	248	0.350806
chr3R-24379879	intergenic	chr3R	24379879	24380149	270	0.533333
chr3R-24386198	intergenic	chr3R	24386198	24386403	205	0.439024
chr3R-24386560	intergenic	chr3R	24386560	24386807	247	0.445344
chr3R-24387443	intergenic	chr3R	24387443	24387653	210	0.4
chr3R-24390338	intergenic	chr3R	24390338	24390727	389	0.501285
chr3R-24403310	intergenic	chr3R	24403310	24403558	248	0.41129
chr3R-24468946	intergenic	chr3R	24468946	24469146	200	0.43
chr3R-24470605	intergenic	chr3R	24470605	24470888	283	0.459364
chr3R-24525389	intron	chr3R	24525389	24525659	270	0.440741
chr3R-24533009	intron	chr3R	24533009	24533213	204	0.411765
chr3R-24605971	intergenic	chr3R	24605971	24606189	218	0.463303
chr3R-24610205	intergenic	chr3R	24610205	24610415	210	0.47619
chr3R-24721791	intron	chr3R	24721791	24722002	211	0.488152
chr3R-24744426	intron	chr3R	24744426	24744743	317	0.29653
chr3R-24776295	intron	chr3R	24776295	24776513	218	0.385321
chr3R-24787018	intron	chr3R	24787018	24787287	269	0.423792
chr3R-24787374	intron	chr3R	24787374	24787578	204	0.495098
chr3R-24791193	intron	chr3R	24791193	24791414	221	0.470588
chr3R-24804521	intergenic	chr3R	24804521	24804729	208	0.432692
chr3R-24808637	intergenic	chr3R	24808637	24808849	212	0.429245
chr3R-24833404	intron	chr3R	24833404	24833617	213	0.347418
chr3R-24893709	intron	chr3R	24893709	24893980	271	0.479705
chr3R-25030624	intergenic	chr3R	25030624	25030851	227	0.343612
chr3R-25088789	intergenic	chr3R	25088789	25089018	229	0.449782
chr3R-25104167	intergenic	chr3R	25104167	25104406	239	0.41841
chr3R-25109800	intergenic	chr3R	25109800	25110003	203	0.46798
chr3R-25111668	intergenic	chr3R	25111668	25111890	222	0.445946
chr3R-25172814	intergenic	chr3R	25172814	25173039	225	0.342222
chr3R-25182316	intergenic	chr3R	25182316	25182549	233	0.407725
chr3R-25230160	intron	chr3R	25230160	25230373	213	0.492958
chr3R-25348298	intergenic	chr3R	25348298	25348527	229	0.449782
chr3R-25358250	intergenic	chr3R	25358250	25358451	201	0.393035
chr3R-25361150	intergenic	chr3R	25361150	25361351	201	0.432836
chr3R-25362340	intergenic	chr3R	25362340	25362566	226	0.415929
chr3R-25369124	intergenic	chr3R	25369124	25369335	211	0.507109
chr3R-25374313	intergenic	chr3R	25374313	25374570	257	0.498054
chr3R-25380222	intergenic	chr3R	25380222	25380428	206	0.378641
chr3R-25387410	intron	chr3R	25387410	25387752	342	0.479532
chr3R-25395073	intergenic	chr3R	25395073	25395333	260	0.492308
chr3R-25395835	intergenic	chr3R	25395835	25396046	211	0.450237
chr3R-25400711	intergenic	chr3R	25400711	25400985	274	0.423358
chr3R-25472226	intron	chr3R	25472226	25472437	211	0.49763
chr3R-25663351	intergenic	chr3R	25663351	25663560	209	0.492823
chr3R-25669421	intron	chr3R	25669421	25669626	205	0.439024
chr3R-2611679	intergenic	chr3R	2611679	2611885	206	0.446602
chr3R-26492155	intergenic	chr3R	26492155	26492360	205	0.409756
chr3R-26536810	intergenic	chr3R	26536810	26537110	300	0.376667
chr3R-26546576	intergenic	chr3R	26546576	26546808	232	0.387931
chr3R-26578512	intergenic	chr3R	26578512	26578726	214	0.429907
chr3R-26594294	intron	chr3R	26594294	26594550	256	0.402344
chr3R-26671737	intergenic	chr3R	26671737	26671942	205	0.434146
chr3R-26685724	intergenic	chr3R	26685724	26685971	247	0.510121
chr3R-26733664	intergenic	chr3R	26733664	26733912	248	0.46371
chr3R-2682930	intergenic	chr3R	2682930	2683221	291	0.38488
chr3R-26989870	intron	chr3R	26989870	26990070	200	0.43
chr3R-26992718	intron	chr3R	26992718	26992941	223	0.421525
chr3R-27103474	intergenic	chr3R	27103474	27103701	227	0.453745
chr3R-27112091	intergenic	chr3R	27112091	27112292	201	0.447761
chr3R-27146318	intron	chr3R	27146318	27146532	214	0.378505
chr3R-27174936	intron	chr3R	27174936	27175149	213	0.370892
chr3R-2717817	intergenic	chr3R	2717817	2718197	380	0.418421
chr3R-27305416	intergenic	chr3R	27305416	27305618	202	0.445545
chr3R-27306420	intergenic	chr3R	27306420	27306655	235	0.451064
chr3R-27312469	intergenic	chr3R	27312469	27312720	251	0.434263
chr3R-27334028	intergenic	chr3R	27334028	27334271	243	0.485597
chr3R-27335574	intergenic	chr3R	27335574	27335911	337	0.459941
chr3R-27357457	intergenic	chr3R	27357457	27357706	249	0.461847
chr3R-27362775	intergenic	chr3R	27362775	27363033	258	0.430233
chr3R-27376794	intron	chr3R	27376794	27377026	232	0.418103
chr3R-27379812	intron	chr3R	27379812	27380119	307	0.42671
chr3R-27383353	intron	chr3R	27383353	27383567	214	0.462617
chr3R-2751755	intron	chr3R	2751755	2751965	210	0.5
chr3R-27525556	intergenic	chr3R	27525556	27525776	220	0.472727
chr3R-2754574	intron	chr3R	2754574	2754844	270	0.433333
chr3R-27549284	intron	chr3R	27549284	27549492	208	0.4375
chr3R-27682809	intron	chr3R	27682809	27683011	202	0.470297
chr3R-27707719	intron	chr3R	27707719	27707925	206	0.330097
chr3R-27733344	intron	chr3R	27733344	27733557	213	0.41784
chr3R-27827882	intergenic	chr3R	27827882	27828170	288	0.364583
chr3R-2845064	intergenic	chr3R	2845064	2845378	314	0.429936
chr3R-2870539	intergenic	chr3R	2870539	2870871	332	0.424699
chr3R-3030561	intergenic	chr3R	3030561	3030766	205	0.453659
chr3R-3036869	intergenic	chr3R	3036869	3037118	249	0.506024
chr3R-3067672	intron	chr3R	3067672	3067881	209	0.516746
chr3R-3107633	intron	chr3R	3107633	3107900	267	0.516854
chr3R-3115843	intron	chr3R	3115843	3116051	208	0.466346
chr3R-3130762	intron	chr3R	3130762	3130964	202	0.371287
chr3R-3160184	intergenic	chr3R	3160184	3160419	235	0.451064
chr3R-3167763	intergenic	chr3R	3167763	3167970	207	0.439614
chr3R-3168854	intergenic	chr3R	3168854	3169137	283	0.484099
chr3R-3206733	intergenic	chr3R	3206733	3207062	329	0.413374
chr3R-3242635	intergenic	chr3R	3242635	3242838	203	0.438424
chr3R-3251722	intergenic	chr3R	3251722	3251952	230	0.426087
chr3R-3255520	intergenic	chr3R	3255520	3255754	234	0.42735
chr3R-3260781	intergenic	chr3R	3260781	3261014	233	0.433476
chr3R-3281073	intergenic	chr3R	3281073	3281289	216	0.462963
chr3R-3285755	intergenic	chr3R	3285755	3285990	235	0.370213
chr3R-3559795	intergenic	chr3R	3559795	3560699	904	0.365044
chr3R-3561096	intergenic	chr3R	3561096	3561303	207	0.352657
chr3R-3600073	intergenic	chr3R	3600073	3600320	247	0.461538
chr3R-3754659	intron	chr3R	3754659	3754869	210	0.471429
chr3R-3783111	intron	chr3R	3783111	3783367	256	0.460938
chr3R-3964583	intergenic	chr3R	3964583	3964810	227	0.471366
chr3R-4034684	intergenic	chr3R	4034684	4034936	252	0.456349
chr3R-4109004	intergenic	chr3R	4109004	4109220	216	0.449074
chr3R-4203818	intron	chr3R	4203818	4204056	238	0.315126
chr3R-4207748	intron	chr3R	4207748	4207953	205	0.390244
chr3R-4208083	intron	chr3R	4208083	4208301	218	0.261468
chr3R-4273079	intron	chr3R	4273079	4273283	204	0.446078
chr3R-4615422	intron	chr3R	4615422	4615675	253	0.422925
chr3R-4706060	intron	chr3R	4706060	4706283	223	0.426009
chr3R-4796421	intergenic	chr3R	4796421	4796668	247	0.421053
chr3R-4915000	intron	chr3R	4915000	4915289	289	0.50519
chr3R-4972489	intron	chr3R	4972489	4972734	245	0.481633
chr3R-4980850	intron	chr3R	4980850	4981061	211	0.50237
chr3R-5286799	intergenic	chr3R	5286799	5287019	220	0.286364
chr3R-5287394	intergenic	chr3R	5287394	5287643	249	0.409639
chr3R-5288495	intergenic	chr3R	5288495	5288703	208	0.360577
chr3R-5424390	intron	chr3R	5424390	5424642	252	0.404762
chr3R-5467931	intron	chr3R	5467931	5468189	258	0.356589
chr3R-6259808	intergenic	chr3R	6259808	6260013	205	0.463415
chr3R-6264534	intergenic	chr3R	6264534	6264744	210	0.552381
chr3R-6264940	intergenic	chr3R	6264940	6265162	222	0.436937
chr3R-6273105	intergenic	chr3R	6273105	6273358	253	0.513834
chr3R-6275299	intergenic	chr3R	6275299	6275502	203	0.502463
chr3R-6296478	intergenic	chr3R	6296478	6296814	336	0.464286
chr3R-6306741	intergenic	chr3R	6306741	6306945	204	0.382353
chr3R-6318033	intergenic	chr3R	6318033	6318272	239	0.422594
chr3R-6337654	intron	chr3R	6337654	6337879	225	0.466667
chr3R-6366481	intron	chr3R	6366481	6366701	220	0.404545
chr3R-6379515	intron	chr3R	6379515	6379728	213	0.450704
chr3R-6382824	intron	chr3R	6382824	6383040	216	0.472222
chr3R-6389532	intron	chr3R	6389532	6389757	225	0.444444
chr3R-6397863	intron	chr3R	6397863	6398088	225	0.457778
chr3R-6398162	intron	chr3R	6398162	6398446	284	0.454225
chr3R-6400969	intron	chr3R	6400969	6401169	200	0.405
chr3R-6407258	intron	chr3R	6407258	6407525	267	0.213483
chr3R-6412648	intron	chr3R	6412648	6412938	290	0.482759
chr3R-6413432	intron	chr3R	6413432	6413653	221	0.520362
chr3R-6480882	intergenic	chr3R	6480882	6481085	203	0.433498
chr3R-6482549	intron	chr3R	6482549	6482862	313	0.43131
chr3R-6643557	intergenic	chr3R	6643557	6643776	219	0.47032
chr3R-6643905	intergenic	chr3R	6643905	6644114	209	0.478469
chr3R-6644437	intergenic	chr3R	6644437	6644686	249	0.481928
chr3R-6644945	intergenic	chr3R	6644945	6645174	229	0.436681
chr3R-6645852	intergenic	chr3R	6645852	6646126	274	0.485401
chr3R-6744850	intergenic	chr3R	6744850	6745060	210	0.471429
chr3R-6857536	intron	chr3R	6857536	6857747	211	0.488152
chr3R-6883421	intergenic	chr3R	6883421	6883622	201	0.432836
chr3R-7083440	intergenic	chr3R	7083440	7083767	327	0.461774
chr3R-7113362	intron	chr3R	7113362	7113626	264	0.443182
chr3R-7157892	intron	chr3R	7157892	7158118	226	0.548673
chr3R-7160461	intron	chr3R	7160461	7160702	241	0.448133
chr3R-7161901	intron	chr3R	7161901	7162118	217	0.451613
chr3R-7166050	intron	chr3R	7166050	7166276	226	0.433628
chr3R-7188957	intron	chr3R	7188957	7189203	246	0.47561
chr3R-7309825	intergenic	chr3R	7309825	7310056	231	0.458874
chr3R-7354093	intergenic	chr3R	7354093	7354326	233	0.450644
chr3R-7381813	intergenic	chr3R	7381813	7382061	248	0.459677
chr3R-7941989	intergenic	chr3R	7941989	7942215	226	0.424779
chr3R-7992451	intergenic	chr3R	7992451	7992715	264	0.450758
chr3R-8003276	intergenic	chr3R	8003276	8003558	282	0.460993
chr3R-805459	intergenic	chr3R	805459	805703	244	0.434426
chr3R-8091077	intron	chr3R	8091077	8091325	248	0.5
chr3R-8141033	intergenic	chr3R	8141033	8141268	235	0.523404
chr3R-8170333	intergenic	chr3R	8170333	8170534	201	0.492537
chr3R-8171494	intergenic	chr3R	8171494	8171772	278	0.464029
chr3R-8173462	intergenic	chr3R	8173462	8173744	282	0.492908
chr3R-8174479	intergenic	chr3R	8174479	8174702	223	0.421525
chr3R-8422353	intergenic	chr3R	8422353	8422553	200	0.43
chr3R-842933	intergenic	chr3R	842933	843204	271	0.380074
chr3R-8587228	intron	chr3R	8587228	8587437	209	0.416268
chr3R-858794	intergenic	chr3R	858794	859014	220	0.45
chr3R-8589863	intron	chr3R	8589863	8590066	203	0.339901
chr3R-8607085	intron	chr3R	8607085	8607286	201	0.447761
chr3R-8613971	intergenic	chr3R	8613971	8614171	200	0.42
chr3R-8632038	intergenic	chr3R	8632038	8632288	250	0.372
chr3R-8650765	intergenic	chr3R	8650765	8651020	255	0.443137
chr3R-8654577	intergenic	chr3R	8654577	8654846	269	0.442379
chr3R-8703947	intergenic	chr3R	8703947	8704153	206	0.441748
chr3R-8714625	intergenic	chr3R	8714625	8714840	215	0.348837
chr3R-8723380	intergenic	chr3R	8723380	8723593	213	0.441315
chr3R-8724139	intergenic	chr3R	8724139	8724342	203	0.389163
chr3R-8724746	intergenic	chr3R	8724746	8724965	219	0.461187
chr3R-886492	intergenic	chr3R	886492	886703	211	0.469194
chr3R-8884252	intron	chr3R	8884252	8884458	206	0.378641
chr3R-8941778	intron	chr3R	8941778	8942024	246	0.471545
chr3R-8975648	intron	chr3R	8975648	8975852	204	0.495098
chr3R-9015705	intergenic	chr3R	9015705	9015922	217	0.410138
chr3R-9263688	intergenic	chr3R	9263688	9263890	202	0.435644
chr3R-9265645	intergenic	chr3R	9265645	9265877	232	0.431034
chr3R-9266181	intergenic	chr3R	9266181	9266394	213	0.502347
chr3R-9269439	intergenic	chr3R	9269439	9269652	213	0.450704
chr3R-9270650	intergenic	chr3R	9270650	9270886	236	0.466102
chr3R-9271823	intergenic	chr3R	9271823	9272052	229	0.436681
chr3R-9318125	intergenic	chr3R	9318125	9318360	235	0.451064
chr3R-9319127	intergenic	chr3R	9319127	9319332	205	0.478049
chr3R-9323141	intergenic	chr3R	9323141	9323407	266	0.447368
chr3R-9323581	intergenic	chr3R	9323581	9323807	226	0.380531
chr3R-9327458	intergenic	chr3R	9327458	9327684	226	0.442478
chr3R-9333120	intergenic	chr3R	9333120	9333320	200	0.535
chr3R-9335592	intergenic	chr3R	9335592	9335804	212	0.495283
chr3R-9346530	intergenic	chr3R	9346530	9346808	278	0.399281
chr3R-9353689	intergenic	chr3R	9353689	9353896	207	0.42029
chr3R-9355389	intergenic	chr3R	9355389	9355601	212	0.448113
chr3R-9362238	intergenic	chr3R	9362238	9362463	225	0.471111
chr3R-9365472	intergenic	chr3R	9365472	9365741	269	0.494424
chr3R-9376046	intergenic	chr3R	9376046	9376275	229	0.379913
chr3R-9385124	intergenic	chr3R	9385124	9385358	234	0.444444
chr3R-9387725	intergenic	chr3R	9387725	9387928	203	0.463054
chr3R-9391184	intergenic	chr3R	9391184	9391468	284	0.426056
chr3R-9394667	intergenic	chr3R	9394667	9394874	207	0.444444
chr3R-9397900	intergenic	chr3R	9397900	9398170	270	0.537037
chr3R-9404101	intergenic	chr3R	9404101	9404378	277	0.440433
chr3R-9404989	intergenic	chr3R	9404989	9405192	203	0.53202
chr3R-9416124	intergenic	chr3R	9416124	9416340	216	0.388889
chr3R-9428144	intergenic	chr3R	9428144	9428385	241	0.526971
chr3R-9455118	intergenic	chr3R	9455118	9455319	201	0.482587
chr3R-9565501	intron	chr3R	9565501	9565740	239	0.426778
chr3R-9612830	intergenic	chr3R	9612830	9613209	379	0.519789
chr3R-9622629	intergenic	chr3R	9622629	9622849	220	0.440909
chr3R-9683563	intergenic	chr3R	9683563	9683853	290	0.355172
chr3R-9685169	intergenic	chr3R	9685169	9685428	259	0.432432
chr3R-9719433	intergenic	chr3R	9719433	9719640	207	0.458937
chr3R-9724423	intergenic	chr3R	9724423	9724635	212	0.40566
chr3R-9731764	intergenic	chr3R	9731764	9731996	232	0.396552
chr3R-9737662	intergenic	chr3R	9737662	9737872	210	0.37619
chr3R-9737896	intergenic	chr3R	9737896	9738096	200	0.44
chr3R-9738316	intergenic	chr3R	9738316	9738567	251	0.386454
chr3R-9742119	intergenic	chr3R	9742119	9742330	211	0.369668
chr3R-9756500	intergenic	chr3R	9756500	9756722	222	0.414414
chr3R-9766129	intergenic	chr3R	9766129	9766354	225	0.475556
chr3R-9769801	intergenic	chr3R	9769801	9770022	221	0.41629
chr3R-9799587	intron	chr3R	9799587	9799861	274	0.379562
chr3R-980460	intron	chr3R	980460	980672	212	0.396226
chr4-345456	intron	chr4	345456	346098	642	0.34891
chr4-346155	intron	chr4	346155	346565	410	0.382927
chr4-347493	intron	chr4	347493	347703	210	0.361905
chr4-733558	intron	chr4	733558	733785	227	0.427313
chrX-1024947	intron	chrX	1024947	1025158	211	0.407583
chrX-10539770	intron	chrX	10539770	10540001	231	0.428571
chrX-11596393	intron	chrX	11596393	11596593	200	0.37
chrX-11825317	intergenic	chrX	11825317	11825604	287	0.1777
chrX-11836915	intron	chrX	11836915	11837136	221	0.266968
chrX-12365028	intron	chrX	12365028	12365257	229	0.388646
chrX-12564054	intron	chrX	12564054	12564257	203	0.359606
chrX-1298463	intergenic	chrX	1298463	1298705	242	0.533058
chrX-13521132	intron	chrX	13521132	13521341	209	0.416268
chrX-13800621	intron	chrX	13800621	13800833	212	0.438679
chrX-13815429	intron	chrX	13815429	13815650	221	0.484163
chrX-14246289	intron	chrX	14246289	14246545	256	0.476562
chrX-1432302	intron	chrX	1432302	1432577	275	0.414545
chrX-14414783	intergenic	chrX	14414783	14414993	210	0.419048
chrX-15060677	intergenic	chrX	15060677	15060948	271	0.431734
chrX-15154819	intergenic	chrX	15154819	15155094	275	0.407273
chrX-15270793	intron	chrX	15270793	15270997	204	0.416667
chrX-15273014	intergenic	chrX	15273014	15273214	200	0.455
chrX-16027488	intron	chrX	16027488	16027723	235	0.46383
chrX-16030218	intron	chrX	16030218	16030433	215	0.4
chrX-16059790	intergenic	chrX	16059790	16060201	411	0.425791
chrX-16061687	intergenic	chrX	16061687	16061887	200	0.445
chrX-16065097	intergenic	chrX	16065097	16065392	295	0.376271
chrX-16069034	intergenic	chrX	16069034	16069247	213	0.422535
chrX-16081397	intergenic	chrX	16081397	16081617	220	0.486364
chrX-1618194	intergenic	chrX	1618194	1618407	213	0.469484
chrX-16366466	intron	chrX	16366466	16366708	242	0.409091
chrX-17229406	intergenic	chrX	17229406	17229610	204	0.470588
chrX-17696274	intron	chrX	17696274	17696479	205	0.419512
chrX-17835456	intron	chrX	17835456	17835661	205	0.409756
chrX-18004153	intron	chrX	18004153	18004384	231	0.316017
chrX-18090929	intron	chrX	18090929	18091156	227	0.568282
chrX-18185177	intergenic	chrX	18185177	18185412	235	0.52766
chrX-18475188	intergenic	chrX	18475188	18475408	220	0.427273
chrX-1851828	intron	chrX	1851828	1852253	425	0.343529
chrX-18564452	intergenic	chrX	18564452	18564672	220	0.35
chrX-19343219	intron	chrX	19343219	19343551	332	0.466867
chrX-19927156	intron	chrX	19927156	19927374	218	0.444954
chrX-20251169	intergenic	chrX	20251169	20251377	208	0.442308
chrX-2028570	intron	chrX	2028570	2028804	234	0.517094
chrX-20465122	intron	chrX	20465122	20465357	235	0.417021
chrX-20508659	intergenic	chrX	20508659	20508873	214	0.509346
chrX-20784646	intron	chrX	20784646	20784854	208	0.375
chrX-20840192	intergenic	chrX	20840192	20840421	229	0.454148
chrX-21342909	intergenic	chrX	21342909	21343230	321	0.327103
chrX-21560826	intergenic	chrX	21560826	21561051	225	0.382222
chrX-21572929	intergenic	chrX	21572929	21573371	442	0.400452
chrX-21574075	intergenic	chrX	21574075	21574504	429	0.340326
chrX-21664822	intergenic	chrX	21664822	21665023	201	0.522388
chrX-22002493	intron	chrX	22002493	22002721	228	0.364035
chrX-22054144	intergenic	chrX	22054144	22054368	224	0.401786
chrX-22206001	intergenic	chrX	22206001	22206285	284	0.383803
chrX-2810056	intron	chrX	2810056	2810262	206	0.466019
chrX-2861972	intron	chrX	2861972	2862199	227	0.422908
chrX-2932665	intron	chrX	2932665	2932910	245	0.461224
chrX-3644169	intron	chrX	3644169	3644373	204	0.45098
chrX-4369861	intron	chrX	4369861	4370107	246	0.418699
chrX-4806185	intron	chrX	4806185	4806414	229	0.366812
chrX-501493	intron	chrX	501493	501723	230	0.469565
chrX-5585543	intron	chrX	5585543	5585760	217	0.331797
chrX-5947222	intron	chrX	5947222	5947431	209	0.545455
chrX-6033173	intron	chrX	6033173	6033437	264	0.469697
chrX-6331872	intron	chrX	6331872	6332077	205	0.478049
chrX-6756747	intergenic	chrX	6756747	6757012	265	0.509434
chrX-7150558	intron	chrX	7150558	7150772	214	0.485981
chrX-7167618	intron	chrX	7167618	7167873	255	0.384314
chrX-7199080	intron	chrX	7199080	7199289	209	0.291866
chrX-7322328	intergenic	chrX	7322328	7322564	236	0.444915
chrX-7356207	intergenic	chrX	7356207	7356532	325	0.449231
chrX-7368382	intergenic	chrX	7368382	7368583	201	0.40796
chrX-7376494	intergenic	chrX	7376494	7376714	220	0.368182
chrX-7443203	intergenic	chrX	7443203	7443545	342	0.391813
chrX-7478595	intergenic	chrX	7478595	7478859	264	0.344697
chrX-7481467	intergenic	chrX	7481467	7481672	205	0.4
chrX-7680559	intergenic	chrX	7680559	7680832	273	0.457875
chrX-8685793	intron	chrX	8685793	8686037	244	0.434426
chrX-8723663	intergenic	chrX	8723663	8723878	215	0.465116
chrX-9579145	intron	chrX	9579145	9579349	204	0.377451
chrX-9633108	intron	chrX	9633108	9633388	280	0.439286
chrX-9914051	intron	chrX	9914051	9914257	206	0.407767
