# Supplementary material for: Dynamic Epigenetic Control of Highly Conserved Noncoding Elements
Source: PLoS One. 2014 Oct 7;9(10):e109326. doi: 10.1371/journal.pone.0109326 (PMC4188601; doi:10.1371/journal.pone.0109326)
Supplement: Table S2 — Table mapping the top 50 overrepresented heptamers to known transcription factor binding sites. (XLSX) [file pone.0109326.s005.xlsx]

## Sheet: TableS2
Heptamer	Identifier	Number of occurrences	Expected number occurrences	Dispersion Index of expected number of occurrences	Binomial Pvalue	Best match to FlyReg	Expected value of match	Match involved in develmental process	Link to FlyBase gene card
CAACTGC	CAACTGC|GCAGTTG	183	72.7248	0.118645	4.33183e-27	vnd	0.000142	TRUE	http://flybase.org/reports/FBgn0261930.html
ACACACA	ACACACA|TGTGTGT	601	377.741	0.116056	3.7647e-26	Top2	0.000134		http://flybase.org/reports/FBgn0003732.html
AGATACA	AGATACA|TGTATCT	150	69.3736	0.117525	7.83646e-17	Top2	0.000215		http://flybase.org/reports/FBgn0003732.html
TGCAACA	TGCAACA|TGTTGCA	196	84.0814	0.0999689	4.21682e-25	suHw	0.000289		http://flybase.org/reports/FBgn0003567.html
CTGCAAC	CTGCAAC|GTTGCAG	140	57.5611	0.117686	7.99703e-20	suHw	0.000289		http://flybase.org/reports/FBgn0003567.html
GGCAGCA	GGCAGCA|TGCTGCC	204	78.7771	0.133585	1.41274e-31	shn	0.00829	TRUE	http://flybase.org/reports/FBgn0003396.html
CAACGGC	CAACGGC|GCCGTTG	106	38.0114	0.0751002	3.4597e-19	pho	0.000362		http://flybase.org/reports/FBgn0002521.html
CAGTTGC	CAGTTGC|GCAACTG	164	64.0467	0.127391	3.57063e-25	ovo	0.000748	TRUE	http://flybase.org/reports/FBgn0003028.html
CAGATAC	CAGATAC|GTATCTG	140	51.5556	0.144326	6.74644e-24	ovo	0.00142	TRUE	http://flybase.org/reports/FBgn0003028.html
CAGCAGC	CAGCAGC|GCTGCTG	631	143.365	0.178365	3.59382e-196	Med	0.00648	TRUE	http://flybase.org/reports/FBgn0011655.html
CAGCGGC	CAGCGGC|GCCGCTG	174	46.7855	0.0992802	1.49209e-45	Med	0.00534	TRUE	http://flybase.org/reports/FBgn0011655.html
CGGCAGC	CGGCAGC|GCTGCCG	167	51.8147	0.107906	1.98905e-36	Mad	0.000887	TRUE	http://flybase.org/reports/FBgn0011648.html
CGTCGTC	CGTCGTC|GACGACG	102	34.4317	0.245903	3.02965e-20	Mad	0.00148	TRUE	http://flybase.org/reports/FBgn0011648.html
CGACGAC	CGACGAC|GTCGTCG	124	48.1587	0.109912	1.51301e-19	Mad	0.0081	TRUE	http://flybase.org/reports/FBgn0011648.html
CGACGTC	CGACGTC|GACGTCG	67	18.543	0.179482	1.1219e-17	Mad	0.00149	TRUE	http://flybase.org/reports/FBgn0011648.html
CGGCGAC	CGGCGAC|GTCGCCG	82	24.2167	0.133201	9.61566e-20	ftz-f1	3.26e-05	TRUE	http://flybase.org/reports/FBgn0001078.html
CACACAC	CACACAC|GTGTGTG	596	357.556	0.125554	1.30175e-30	ey	0.000664	TRUE	http://flybase.org/reports/FBgn0005558.html
ACAGCAA	ACAGCAA|TTGCTGT	261	94.3984	0.10254	1.24914e-44	Epi74EF	8.3e-05		Not found
AGCGGCA	AGCGGCA|TGCCGCT	176	60.2306	0.0832874	2.73113e-33	brk	0.000392	TRUE	http://flybase.org/reports/FBgn0024250.html
GCGGCAA	GCGGCAA|TTGCCGC	166	60.3186	0.0865839	1.08623e-28	brk	0.00335	TRUE	http://flybase.org/reports/FBgn0024250.html
GGCGGCA	GGCGGCA|TGCCGCC	111	39.2958	0.0826712	1.98742e-20	brk	7.54e-05	TRUE	http://flybase.org/reports/FBgn0024250.html
ACGACGA	ACGACGA|TCGTCGT	107	34.5278	0.199191	1.43902e-22	bin	0.00109	TRUE	http://flybase.org/reports/FBgn0045759.html
AACAACG	AACAACG|CGTTGTT	111	41.6676	0.134117	1.20904e-18	bin	1.89e-07	TRUE	http://flybase.org/reports/FBgn0045759.html
ACAACGA	ACAACGA|TCGTTGT	109	42.8543	0.0988581	5.44384e-17	bin	1.89e-07	TRUE	http://flybase.org/reports/FBgn0045759.html
AGCAGCG	AGCAGCG|CGCTGCT	124	52.6375	0.113953	1.02621e-16	bin	0.0114	TRUE	http://flybase.org/reports/FBgn0045759.html
AGCAGCA	AGCAGCA|TGCTGCT	594	157.343	0.142933	6.31925e-155	Aef1	0.0153		http://flybase.org/reports/FBgn0005694.html
CAGCAAC	CAGCAAC|GTTGCTG	444	99.7138	0.0993857	3.38503e-140	Aef1	5.02e-06		http://flybase.org/reports/FBgn0005694.html
CAACAAC	CAACAAC|GTTGTTG	516	147.592	0.126402	2.50059e-122	Aef1	4.88e-11		http://flybase.org/reports/FBgn0005694.html
AGCAACA	AGCAACA|TGTTGCT	451	121.294	0.0818181	8.18565e-116	Aef1	1.24e-05		http://flybase.org/reports/FBgn0005694.html
CAACAGC	CAACAGC|GCTGTTG	314	76.6783	0.090654	7.70962e-91	Aef1	5.2e-06		http://flybase.org/reports/FBgn0005694.html
AACAGCA	AACAGCA|TGCTGTT	322	89.5698	0.107199	1.08777e-79	Aef1	1.24e-05		http://flybase.org/reports/FBgn0005694.html
AACAACA	AACAACA|TGTTGTT	517	202.351	0.103214	7.37396e-76	Aef1	1.79e-10		http://flybase.org/reports/FBgn0005694.html
ACAACAA	ACAACAA|TTGTTGT	499	193.194	0.110705	1.03628e-74	Aef1	4.12e-07		http://flybase.org/reports/FBgn0005694.html
GCAACAA	GCAACAA|TTGTTGC	408	154.092	0.0808243	4.36011e-64	Aef1	4.12e-07		http://flybase.org/reports/FBgn0005694.html
GCAGCAA	GCAGCAA|TTGCTGC	362	130.692	0.0862786	1.68393e-61	Aef1	0.00202		http://flybase.org/reports/FBgn0005694.html
CTGTTGC	CTGTTGC|GCAACAG	211	56.755	0.159084	6.25496e-55	Aef1	0.000351		http://flybase.org/reports/FBgn0005694.html
CGACAAC	CGACAAC|GTTGTCG	145	30.8039	0.201901	2.16935e-49	Aef1	5.02e-06		http://flybase.org/reports/FBgn0005694.html
ATGTTGC	ATGTTGC|GCAACAT	206	68.1851	0.142116	1.06598e-40	Aef1	0.00035		http://flybase.org/reports/FBgn0005694.html
CGGCAAC	CGGCAAC|GTTGCCG	145	40.2063	0.108929	8.90882e-37	Aef1	0.00909		http://flybase.org/reports/FBgn0005694.html
ACGACAA	ACGACAA|TTGTCGT	133	34.9114	0.146212	3.89208e-36	Aef1	0.00202		http://flybase.org/reports/FBgn0005694.html
GGCAACA	GGCAACA|TGTTGCC	213	88.4607	0.103697	7.00047e-29	Aef1	0.000351		http://flybase.org/reports/FBgn0005694.html
AACGACA	AACGACA|TGTCGTT	106	33.0838	0.154721	2.07751e-23	Aef1	1.85e-05		http://flybase.org/reports/FBgn0005694.html
ACAACAG	ACAACAG|CTGTTGT	146	57.9329	0.118793	5.94921e-22	Aef1	1.12e-06		http://flybase.org/reports/FBgn0005694.html
CAACATC	CAACATC|GATGTTG	130	49.0928	0.152151	2.12098e-21	Aef1	5.02e-06		http://flybase.org/reports/FBgn0005694.html
CAACGAC	CAACGAC|GTCGTTG	102	33.1792	0.143216	2.46659e-21	Aef1	7.63e-06		http://flybase.org/reports/FBgn0005694.html
ACAGCAG	ACAGCAG|CTGCTGT	162	70.7409	0.10732	2.75051e-20	Aef1	0.00372		http://flybase.org/reports/FBgn0005694.html
AACATCA	AACATCA|TGATGTT	127	52.1103	0.184474	3.56494e-18	Aef1	1.24e-05		http://flybase.org/reports/FBgn0005694.html
CAACATG	CAACATG|CATGTTG	113	45.4366	0.154215	6.62895e-17	Aef1	0.000351		http://flybase.org/reports/FBgn0005694.html
CAACAAA	CAACAAA|TTTGTTG	301	178.484	0.066733	7.28109e-17	Aef1	2.12e-07		http://flybase.org/reports/FBgn0005694.html
CTGCTGC	CTGCTGC|GCAGCAG	530	136.406	0.187315	2.7497e-143	Adf1	0.012		http://flybase.org/reports/FBgn0000054.html
