# Supplementary material for: Dynamic Epigenetic Control of Highly Conserved Noncoding Elements
Source: PLoS One. 2014 Oct 7;9(10):e109326. doi: 10.1371/journal.pone.0109326 (PMC4188601; doi:10.1371/journal.pone.0109326)
Supplement: Table S3 — Table listing the Gene Ontology enrichment (biological processes only) among the HCNE-proximal genes. (XLSX) [file pone.0109326.s006.xlsx]

## Sheet: Inr DEP
GO term	Holm-Bonferroni adjusted P-value	Genes (FlyBase ID)
organ development	0.000237723	FBgn0000008,FBgn0000014,FBgn0000273,FBgn0000287,FBgn0000394,FBgn0000395,FBgn0000439,FBgn0000492,FBgn0000547,FBgn0000633,FBgn0000636,FBgn0000658,FBgn0001320,FBgn0002733,FBgn0003118,FBgn0003174,FBgn0003175,FBgn0003255,FBgn0003285,FBgn0003319,FBgn0003888,FBgn0003896,FBgn0003944,FBgn0003997,FBgn0004169,FBgn0004362,FBgn0004396,FBgn0004449,FBgn0004863,FBgn0004876,FBgn0004893,FBgn0005771,FBgn0010397,FBg…
system development	0.00141579	FBgn0000008,FBgn0000014,FBgn0000273,FBgn0000287,FBgn0000394,FBgn0000395,FBgn0000439,FBgn0000492,FBgn0000547,FBgn0000633,FBgn0000636,FBgn0000658,FBgn0001320,FBgn0002733,FBgn0003118,FBgn0003174,FBgn0003175,FBgn0003255,FBgn0003285,FBgn0003319,FBgn0003721,FBgn0003888,FBgn0003896,FBgn0003944,FBgn0003997,FBgn0004169,FBgn0004362,FBgn0004396,FBgn0004449,FBgn0004863,FBgn0004876,FBgn0004880,FBgn0004893,FBg…
cell adhesion	0.0045616	FBgn0000547,FBgn0000636,FBgn0003118,FBgn0003285,FBgn0004449,FBgn0005775,FBgn0010452,FBgn0014380,FBgn0015229,FBgn0017590,FBgn0026403,FBgn0028482,FBgn0028644,FBgn0031969,FBgn0035815,FBgn0038439,FBgn0250908,FBgn0260660,FBgn0262614,FBgn0263219
biological adhesion	0.012792	FBgn0000547,FBgn0000636,FBgn0003118,FBgn0003285,FBgn0004449,FBgn0005775,FBgn0010452,FBgn0014380,FBgn0015229,FBgn0017590,FBgn0026403,FBgn0028482,FBgn0028644,FBgn0031969,FBgn0035815,FBgn0038439,FBgn0250908,FBgn0260660,FBgn0262614,FBgn0263219
generation of neurons	0.0144978	FBgn0000014,FBgn0000492,FBgn0000547,FBgn0000636,FBgn0000658,FBgn0001320,FBgn0003118,FBgn0003285,FBgn0003721,FBgn0003888,FBgn0003896,FBgn0003997,FBgn0004362,FBgn0004449,FBgn0004876,FBgn0004880,FBgn0005612,FBgn0005775,FBgn0010452,FBgn0010473,FBgn0011278,FBgn0013469,FBgn0015380,FBgn0017590,FBgn0028644,FBgn0029114,FBgn0035379,FBgn0035574,FBgn0036620,FBgn0086680,FBgn0086758,FBgn0259938,FBgn0259986,FBg…
response to chemical	0.0282271	FBgn0000273,FBgn0000636,FBgn0003888,FBgn0003896,FBgn0003997,FBgn0004244,FBgn0004449,FBgn0005775,FBgn0010452,FBgn0010473,FBgn0010620,FBgn0015380,FBgn0015903,FBgn0016930,FBgn0017590,FBgn0020300,FBgn0028644,FBgn0032151,FBgn0035379,FBgn0035542,FBgn0035574,FBgn0036428,FBgn0036697,FBgn0038095,FBgn0038282,FBgn0038440,FBgn0038542,FBgn0040726,FBgn0051345,FBgn0086370,FBgn0086680,FBgn0086711,FBgn0260660,FBg…
imaginal disc development	0.0335458	FBgn0000014,FBgn0000273,FBgn0000287,FBgn0000395,FBgn0000492,FBgn0000547,FBgn0000636,FBgn0000658,FBgn0003118,FBgn0003175,FBgn0003319,FBgn0003896,FBgn0003944,FBgn0003997,FBgn0004863,FBgn0004893,FBgn0005771,FBgn0010452,FBgn0010620,FBgn0011278,FBgn0015380,FBgn0025525,FBgn0030870,FBgn0033033,FBgn0035574,FBgn0043364,FBgn0044028,FBgn0051145,FBgn0085397,FBgn0086758,FBgn0259986,FBgn0261963,FBgn0262160,FBg…
synaptic target attraction	0.0339071	FBgn0000636,FBgn0004449,FBgn0005775,FBgn0264273
heart development	0.0457192	FBgn0000014,FBgn0000633,FBgn0003118,FBgn0003888,FBgn0003896,FBgn0003944,FBgn0011278,FBgn0015903,FBgn0035956,FBgn0260642,FBgn0261963,FBgn0262473
response to alcohol	0.0457192	FBgn0000273,FBgn0003997,FBgn0015903,FBgn0017590,FBgn0020300,FBgn0035542,FBgn0036428,FBgn0036697,FBgn0038282,FBgn0261461,FBgn0263049,FBgn0264490

## Sheet: Inr only  
GO term	Holm-Bonferroni adjusted P-value	Genes (FlyBase ID)
regulation of transcription, DNA-templated	1.19193e-16	FBgn0000015,FBgn0000179,FBgn0000233,FBgn0000459,FBgn0000490,FBgn0000577,FBgn0001138,FBgn0001148,FBgn0001235,FBgn0001323,FBgn0002633,FBgn0003117,FBgn0003339,FBgn0003459,FBgn0003866,FBgn0003870,FBgn0004567,FBgn0004606,FBgn0004618,FBgn0004644,FBgn0004860,FBgn0004861,FBgn0004892,FBgn0005630,FBgn0005638,FBgn0008646,FBgn0008651,FBgn0010109,FBgn0010313,FBgn0011758,FBgn0015524,FBgn0015904,FBgn0015919,FBg…
regulation of RNA biosynthetic process	1.19193e-16	FBgn0000015,FBgn0000179,FBgn0000233,FBgn0000459,FBgn0000490,FBgn0000577,FBgn0001138,FBgn0001148,FBgn0001235,FBgn0001323,FBgn0002633,FBgn0003117,FBgn0003339,FBgn0003459,FBgn0003866,FBgn0003870,FBgn0004567,FBgn0004606,FBgn0004618,FBgn0004644,FBgn0004860,FBgn0004861,FBgn0004892,FBgn0005630,FBgn0005638,FBgn0008646,FBgn0008651,FBgn0010109,FBgn0010313,FBgn0011758,FBgn0015524,FBgn0015904,FBgn0015919,FBg…
transcription, DNA-templated	2.98275e-15	FBgn0000015,FBgn0000179,FBgn0000233,FBgn0000459,FBgn0000490,FBgn0000577,FBgn0001138,FBgn0001148,FBgn0001235,FBgn0001323,FBgn0002633,FBgn0003117,FBgn0003339,FBgn0003459,FBgn0003866,FBgn0003870,FBgn0004567,FBgn0004606,FBgn0004618,FBgn0004644,FBgn0004860,FBgn0004861,FBgn0004892,FBgn0005630,FBgn0005638,FBgn0008646,FBgn0008651,FBgn0010109,FBgn0010313,FBgn0011758,FBgn0015524,FBgn0015904,FBgn0015919,FBg…
RNA biosynthetic process	3.45272e-15	FBgn0000015,FBgn0000179,FBgn0000233,FBgn0000459,FBgn0000490,FBgn0000577,FBgn0001138,FBgn0001148,FBgn0001235,FBgn0001323,FBgn0002633,FBgn0003117,FBgn0003339,FBgn0003459,FBgn0003866,FBgn0003870,FBgn0004567,FBgn0004606,FBgn0004618,FBgn0004644,FBgn0004860,FBgn0004861,FBgn0004892,FBgn0005630,FBgn0005638,FBgn0008646,FBgn0008651,FBgn0010109,FBgn0010313,FBgn0011758,FBgn0015524,FBgn0015904,FBgn0015919,FBg…
regulation of RNA metabolic process	5.33829e-15	FBgn0000015,FBgn0000179,FBgn0000233,FBgn0000459,FBgn0000490,FBgn0000577,FBgn0001138,FBgn0001148,FBgn0001235,FBgn0001323,FBgn0002633,FBgn0003117,FBgn0003339,FBgn0003459,FBgn0003866,FBgn0003870,FBgn0004567,FBgn0004606,FBgn0004618,FBgn0004644,FBgn0004860,FBgn0004861,FBgn0004892,FBgn0005630,FBgn0005638,FBgn0008646,FBgn0008651,FBgn0010109,FBgn0010313,FBgn0011758,FBgn0015524,FBgn0015904,FBgn0015919,FBg…
regulation of macromolecule biosynthetic process	1.31699e-14	FBgn0000015,FBgn0000179,FBgn0000233,FBgn0000459,FBgn0000490,FBgn0000577,FBgn0001138,FBgn0001148,FBgn0001235,FBgn0001323,FBgn0002633,FBgn0003117,FBgn0003339,FBgn0003459,FBgn0003866,FBgn0003870,FBgn0004567,FBgn0004606,FBgn0004618,FBgn0004644,FBgn0004860,FBgn0004861,FBgn0004892,FBgn0005630,FBgn0005638,FBgn0008646,FBgn0008651,FBgn0010109,FBgn0010313,FBgn0011758,FBgn0015524,FBgn0015904,FBgn0015919,FBg…
regulation of cellular macromolecule biosynthetic process	1.31699e-14	FBgn0000015,FBgn0000179,FBgn0000233,FBgn0000459,FBgn0000490,FBgn0000577,FBgn0001138,FBgn0001148,FBgn0001235,FBgn0001323,FBgn0002633,FBgn0003117,FBgn0003339,FBgn0003459,FBgn0003866,FBgn0003870,FBgn0004567,FBgn0004606,FBgn0004618,FBgn0004644,FBgn0004860,FBgn0004861,FBgn0004892,FBgn0005630,FBgn0005638,FBgn0008646,FBgn0008651,FBgn0010109,FBgn0010313,FBgn0011758,FBgn0015524,FBgn0015904,FBgn0015919,FBg…
regulation of cellular biosynthetic process	2.39137e-14	FBgn0000015,FBgn0000179,FBgn0000233,FBgn0000459,FBgn0000490,FBgn0000577,FBgn0001138,FBgn0001148,FBgn0001235,FBgn0001323,FBgn0002633,FBgn0003117,FBgn0003339,FBgn0003459,FBgn0003495,FBgn0003866,FBgn0003870,FBgn0004567,FBgn0004606,FBgn0004618,FBgn0004644,FBgn0004860,FBgn0004861,FBgn0004892,FBgn0005630,FBgn0005638,FBgn0008646,FBgn0008651,FBgn0010109,FBgn0010313,FBgn0011758,FBgn0015524,FBgn0015904,FBg…
regulation of biosynthetic process	2.50138e-14	FBgn0000015,FBgn0000179,FBgn0000233,FBgn0000459,FBgn0000490,FBgn0000577,FBgn0001138,FBgn0001148,FBgn0001235,FBgn0001323,FBgn0002633,FBgn0003117,FBgn0003339,FBgn0003459,FBgn0003495,FBgn0003866,FBgn0003870,FBgn0004567,FBgn0004606,FBgn0004618,FBgn0004644,FBgn0004860,FBgn0004861,FBgn0004892,FBgn0005630,FBgn0005638,FBgn0008646,FBgn0008651,FBgn0010109,FBgn0010313,FBgn0011758,FBgn0015524,FBgn0015904,FBg…
nucleobase-containing compound biosynthetic process	4.3593e-13	FBgn0000015,FBgn0000179,FBgn0000233,FBgn0000459,FBgn0000490,FBgn0000577,FBgn0001138,FBgn0001148,FBgn0001235,FBgn0001323,FBgn0002633,FBgn0003117,FBgn0003339,FBgn0003459,FBgn0003866,FBgn0003870,FBgn0004567,FBgn0004606,FBgn0004618,FBgn0004644,FBgn0004860,FBgn0004861,FBgn0004892,FBgn0005630,FBgn0005638,FBgn0008646,FBgn0008651,FBgn0010109,FBgn0010313,FBgn0011758,FBgn0013972,FBgn0015524,FBgn0015904,FBg…
regulation of nitrogen compound metabolic process	5.8235e-13	FBgn0000015,FBgn0000179,FBgn0000233,FBgn0000459,FBgn0000490,FBgn0000577,FBgn0001138,FBgn0001148,FBgn0001235,FBgn0001323,FBgn0002633,FBgn0003117,FBgn0003339,FBgn0003459,FBgn0003495,FBgn0003866,FBgn0003870,FBgn0004567,FBgn0004606,FBgn0004618,FBgn0004644,FBgn0004860,FBgn0004861,FBgn0004892,FBgn0005630,FBgn0005638,FBgn0008646,FBgn0008651,FBgn0010109,FBgn0010313,FBgn0011758,FBgn0015524,FBgn0015904,FBg…
regulation of nucleobase-containing compound metabolic process	5.99906e-13	FBgn0000015,FBgn0000179,FBgn0000233,FBgn0000459,FBgn0000490,FBgn0000577,FBgn0001138,FBgn0001148,FBgn0001235,FBgn0001323,FBgn0002633,FBgn0003117,FBgn0003339,FBgn0003459,FBgn0003866,FBgn0003870,FBgn0004567,FBgn0004606,FBgn0004618,FBgn0004644,FBgn0004860,FBgn0004861,FBgn0004892,FBgn0005630,FBgn0005638,FBgn0008646,FBgn0008651,FBgn0010109,FBgn0010313,FBgn0011758,FBgn0015524,FBgn0015904,FBgn0015919,FBg…
cellular nitrogen compound biosynthetic process	9.03369e-13	FBgn0000015,FBgn0000179,FBgn0000233,FBgn0000459,FBgn0000490,FBgn0000577,FBgn0001138,FBgn0001148,FBgn0001235,FBgn0001323,FBgn0002633,FBgn0003117,FBgn0003339,FBgn0003459,FBgn0003495,FBgn0003866,FBgn0003870,FBgn0004567,FBgn0004606,FBgn0004618,FBgn0004644,FBgn0004860,FBgn0004861,FBgn0004892,FBgn0005630,FBgn0005638,FBgn0008646,FBgn0008651,FBgn0010109,FBgn0010313,FBgn0011758,FBgn0013972,FBgn0015524,FBg…
organic cyclic compound biosynthetic process	1.3854e-12	FBgn0000015,FBgn0000179,FBgn0000233,FBgn0000459,FBgn0000490,FBgn0000577,FBgn0001138,FBgn0001148,FBgn0001235,FBgn0001323,FBgn0002633,FBgn0003117,FBgn0003339,FBgn0003459,FBgn0003866,FBgn0003870,FBgn0004567,FBgn0004606,FBgn0004618,FBgn0004644,FBgn0004860,FBgn0004861,FBgn0004892,FBgn0004959,FBgn0005630,FBgn0005638,FBgn0008646,FBgn0008651,FBgn0010109,FBgn0010313,FBgn0011758,FBgn0013972,FBgn0015524,FBg…
aromatic compound biosynthetic process	1.44529e-12	FBgn0000015,FBgn0000179,FBgn0000233,FBgn0000459,FBgn0000490,FBgn0000577,FBgn0001138,FBgn0001148,FBgn0001235,FBgn0001323,FBgn0002633,FBgn0003117,FBgn0003339,FBgn0003459,FBgn0003866,FBgn0003870,FBgn0004567,FBgn0004606,FBgn0004618,FBgn0004644,FBgn0004860,FBgn0004861,FBgn0004892,FBgn0005630,FBgn0005638,FBgn0008646,FBgn0008651,FBgn0010109,FBgn0010313,FBgn0011758,FBgn0013972,FBgn0015524,FBgn0015904,FBg…
heterocycle biosynthetic process	1.62575e-12	FBgn0000015,FBgn0000179,FBgn0000233,FBgn0000459,FBgn0000490,FBgn0000577,FBgn0001138,FBgn0001148,FBgn0001235,FBgn0001323,FBgn0002633,FBgn0003117,FBgn0003339,FBgn0003459,FBgn0003866,FBgn0003870,FBgn0004567,FBgn0004606,FBgn0004618,FBgn0004644,FBgn0004860,FBgn0004861,FBgn0004892,FBgn0005630,FBgn0005638,FBgn0008646,FBgn0008651,FBgn0010109,FBgn0010313,FBgn0011758,FBgn0013972,FBgn0015524,FBgn0015904,FBg…
regulation of transcription from RNA polymerase II promoter	1.7992e-12	FBgn0000015,FBgn0000179,FBgn0000233,FBgn0000459,FBgn0000490,FBgn0000577,FBgn0001138,FBgn0001235,FBgn0002633,FBgn0003117,FBgn0003339,FBgn0003866,FBgn0003870,FBgn0004567,FBgn0004606,FBgn0004618,FBgn0004644,FBgn0005630,FBgn0005638,FBgn0010109,FBgn0011758,FBgn0015904,FBgn0015919,FBgn0016660,FBgn0020307,FBgn0020912,FBgn0024250,FBgn0028789,FBgn0035625,FBgn0037015,FBgn0086655,FBgn0259172,FBgn0261930,FBg…
leg disc development	5.40654e-12	FBgn0000233,FBgn0000459,FBgn0000490,FBgn0001235,FBgn0003866,FBgn0003984,FBgn0004644,FBgn0004858,FBgn0004892,FBgn0008651,FBgn0011591,FBgn0011758,FBgn0016660,FBgn0020307,FBgn0020378,FBgn0026411,FBgn0050115,FBgn0050456,FBgn0086655,FBgn0259172
regulation of gene expression	7.95683e-12	FBgn0000015,FBgn0000179,FBgn0000233,FBgn0000459,FBgn0000490,FBgn0000577,FBgn0001138,FBgn0001148,FBgn0001235,FBgn0001323,FBgn0002633,FBgn0003117,FBgn0003339,FBgn0003459,FBgn0003866,FBgn0003870,FBgn0004567,FBgn0004606,FBgn0004618,FBgn0004644,FBgn0004858,FBgn0004860,FBgn0004861,FBgn0004892,FBgn0005630,FBgn0005638,FBgn0008646,FBgn0008651,FBgn0010109,FBgn0010313,FBgn0011758,FBgn0015524,FBgn0015904,FBg…
imaginal disc development	6.30263e-11	FBgn0000015,FBgn0000179,FBgn0000233,FBgn0000459,FBgn0000490,FBgn0000577,FBgn0001235,FBgn0001987,FBgn0003866,FBgn0003870,FBgn0003984,FBgn0004644,FBgn0004858,FBgn0004892,FBgn0004956,FBgn0008651,FBgn0010313,FBgn0011591,FBgn0011758,FBgn0015904,FBgn0015919,FBgn0016660,FBgn0020307,FBgn0020378,FBgn0023095,FBgn0024250,FBgn0026411,FBgn0028789,FBgn0037207,FBgn0039709,FBgn0050115,FBgn0050456,FBgn0053196,FBg…
organ development	6.44479e-11	FBgn0000015,FBgn0000179,FBgn0000233,FBgn0000459,FBgn0000490,FBgn0000577,FBgn0001138,FBgn0001148,FBgn0001235,FBgn0001987,FBgn0002528,FBgn0002633,FBgn0003117,FBgn0003292,FBgn0003339,FBgn0003866,FBgn0003870,FBgn0003984,FBgn0004028,FBgn0004606,FBgn0004618,FBgn0004644,FBgn0004858,FBgn0004892,FBgn0004956,FBgn0005630,FBgn0008651,FBgn0010238,FBgn0010313,FBgn0011591,FBgn0011674,FBgn0011758,FBgn0015904,FBg…
regionalization	7.21133e-11	FBgn0000015,FBgn0000179,FBgn0000233,FBgn0000459,FBgn0000490,FBgn0000577,FBgn0001148,FBgn0001235,FBgn0001987,FBgn0003117,FBgn0003292,FBgn0003339,FBgn0003495,FBgn0003866,FBgn0003984,FBgn0004567,FBgn0004644,FBgn0004892,FBgn0004956,FBgn0010313,FBgn0011591,FBgn0011758,FBgn0015524,FBgn0015904,FBgn0015919,FBgn0016660,FBgn0020307,FBgn0024250,FBgn0026411,FBgn0039283,FBgn0039709,FBgn0050115,FBgn0086655,FBg…
system development	1.11095e-10	FBgn0000015,FBgn0000179,FBgn0000180,FBgn0000233,FBgn0000459,FBgn0000490,FBgn0000577,FBgn0001138,FBgn0001148,FBgn0001235,FBgn0001323,FBgn0001987,FBgn0002528,FBgn0002633,FBgn0003117,FBgn0003292,FBgn0003339,FBgn0003435,FBgn0003495,FBgn0003866,FBgn0003870,FBgn0003984,FBgn0004028,FBgn0004567,FBgn0004606,FBgn0004618,FBgn0004644,FBgn0004858,FBgn0004861,FBgn0004892,FBgn0004956,FBgn0005630,FBgn0008651,FBg…
transcription from RNA polymerase II promoter	1.41103e-10	FBgn0000015,FBgn0000179,FBgn0000233,FBgn0000459,FBgn0000490,FBgn0000577,FBgn0001138,FBgn0001235,FBgn0002633,FBgn0003117,FBgn0003339,FBgn0003866,FBgn0003870,FBgn0004567,FBgn0004606,FBgn0004618,FBgn0004644,FBgn0005630,FBgn0005638,FBgn0010109,FBgn0011758,FBgn0015904,FBgn0015919,FBgn0016660,FBgn0020307,FBgn0020912,FBgn0024250,FBgn0028789,FBgn0035625,FBgn0086655,FBgn0259172,FBgn0261930,FBgn0263511,FBg…
imaginal disc-derived appendage development	2.87015e-10	FBgn0000179,FBgn0000233,FBgn0000459,FBgn0000490,FBgn0000577,FBgn0001235,FBgn0001987,FBgn0003866,FBgn0003870,FBgn0003984,FBgn0004644,FBgn0004858,FBgn0004892,FBgn0008651,FBgn0010313,FBgn0011591,FBgn0015904,FBgn0015919,FBgn0020307,FBgn0020378,FBgn0023095,FBgn0024250,FBgn0026411,FBgn0050115,FBgn0050456,FBgn0053196,FBgn0086655,FBgn0259172,FBgn0259730,FBgn0261563,FBgn0261648,FBgn0263118
appendage development	3.49364e-10	FBgn0000179,FBgn0000233,FBgn0000459,FBgn0000490,FBgn0000577,FBgn0001235,FBgn0001987,FBgn0003866,FBgn0003870,FBgn0003984,FBgn0004644,FBgn0004858,FBgn0004892,FBgn0008651,FBgn0010313,FBgn0011591,FBgn0015904,FBgn0015919,FBgn0020307,FBgn0020378,FBgn0023095,FBgn0024250,FBgn0026411,FBgn0050115,FBgn0050456,FBgn0053196,FBgn0086655,FBgn0259172,FBgn0259730,FBgn0261563,FBgn0261648,FBgn0263118
regulation of primary metabolic process	4.43179e-10	FBgn0000015,FBgn0000179,FBgn0000233,FBgn0000459,FBgn0000490,FBgn0000577,FBgn0001138,FBgn0001148,FBgn0001235,FBgn0001323,FBgn0002633,FBgn0003117,FBgn0003339,FBgn0003459,FBgn0003866,FBgn0003870,FBgn0004567,FBgn0004606,FBgn0004618,FBgn0004644,FBgn0004860,FBgn0004861,FBgn0004892,FBgn0005630,FBgn0005638,FBgn0008646,FBgn0008651,FBgn0010109,FBgn0010313,FBgn0011758,FBgn0015399,FBgn0015524,FBgn0015904,FBg…
anatomical structure development	6.11999e-10	FBgn0000015,FBgn0000179,FBgn0000180,FBgn0000233,FBgn0000451,FBgn0000459,FBgn0000490,FBgn0000577,FBgn0001138,FBgn0001148,FBgn0001235,FBgn0001323,FBgn0001987,FBgn0002528,FBgn0002633,FBgn0003117,FBgn0003292,FBgn0003339,FBgn0003435,FBgn0003459,FBgn0003495,FBgn0003866,FBgn0003870,FBgn0003984,FBgn0004028,FBgn0004567,FBgn0004606,FBgn0004618,FBgn0004644,FBgn0004858,FBgn0004860,FBgn0004861,FBgn0004892,FBg…
anatomical structure morphogenesis	6.33861e-10	FBgn0000015,FBgn0000179,FBgn0000233,FBgn0000459,FBgn0000490,FBgn0000577,FBgn0001138,FBgn0001148,FBgn0001235,FBgn0001987,FBgn0002528,FBgn0002633,FBgn0003117,FBgn0003292,FBgn0003339,FBgn0003435,FBgn0003459,FBgn0003495,FBgn0003866,FBgn0003870,FBgn0003984,FBgn0004028,FBgn0004567,FBgn0004606,FBgn0004618,FBgn0004644,FBgn0004861,FBgn0004892,FBgn0004956,FBgn0005630,FBgn0008651,FBgn0010109,FBgn0010238,FBg…
pattern specification process	9.90876e-10	FBgn0000015,FBgn0000179,FBgn0000233,FBgn0000459,FBgn0000490,FBgn0000577,FBgn0001148,FBgn0001235,FBgn0001987,FBgn0003117,FBgn0003292,FBgn0003339,FBgn0003495,FBgn0003866,FBgn0003984,FBgn0004567,FBgn0004644,FBgn0004892,FBgn0004956,FBgn0010313,FBgn0011591,FBgn0011758,FBgn0015524,FBgn0015904,FBgn0015919,FBgn0016660,FBgn0020307,FBgn0024250,FBgn0026411,FBgn0039283,FBgn0039709,FBgn0050115,FBgn0086655,FBg…
regulation of macromolecule metabolic process	1.06508e-09	FBgn0000015,FBgn0000179,FBgn0000233,FBgn0000459,FBgn0000490,FBgn0000577,FBgn0001138,FBgn0001148,FBgn0001235,FBgn0001323,FBgn0002633,FBgn0003117,FBgn0003339,FBgn0003459,FBgn0003866,FBgn0003870,FBgn0004567,FBgn0004606,FBgn0004618,FBgn0004644,FBgn0004858,FBgn0004860,FBgn0004861,FBgn0004892,FBgn0005630,FBgn0005638,FBgn0008646,FBgn0008651,FBgn0010109,FBgn0010313,FBgn0011758,FBgn0015399,FBgn0015524,FBg…
imaginal disc-derived appendage morphogenesis	1.38436e-09	FBgn0000179,FBgn0000233,FBgn0000459,FBgn0000490,FBgn0000577,FBgn0001235,FBgn0001987,FBgn0003866,FBgn0003870,FBgn0003984,FBgn0004644,FBgn0004892,FBgn0008651,FBgn0010313,FBgn0011591,FBgn0015904,FBgn0015919,FBgn0020307,FBgn0020378,FBgn0023095,FBgn0024250,FBgn0026411,FBgn0050115,FBgn0050456,FBgn0053196,FBgn0086655,FBgn0259172,FBgn0259730,FBgn0261563,FBgn0261648,FBgn0263118
appendage morphogenesis	1.67567e-09	FBgn0000179,FBgn0000233,FBgn0000459,FBgn0000490,FBgn0000577,FBgn0001235,FBgn0001987,FBgn0003866,FBgn0003870,FBgn0003984,FBgn0004644,FBgn0004892,FBgn0008651,FBgn0010313,FBgn0011591,FBgn0015904,FBgn0015919,FBgn0020307,FBgn0020378,FBgn0023095,FBgn0024250,FBgn0026411,FBgn0050115,FBgn0050456,FBgn0053196,FBgn0086655,FBgn0259172,FBgn0259730,FBgn0261563,FBgn0261648,FBgn0263118
regulation of cellular metabolic process	4.35157e-09	FBgn0000015,FBgn0000179,FBgn0000233,FBgn0000459,FBgn0000490,FBgn0000577,FBgn0001138,FBgn0001148,FBgn0001235,FBgn0001323,FBgn0002633,FBgn0003117,FBgn0003339,FBgn0003459,FBgn0003495,FBgn0003866,FBgn0003870,FBgn0004567,FBgn0004606,FBgn0004618,FBgn0004644,FBgn0004860,FBgn0004861,FBgn0004892,FBgn0005630,FBgn0005638,FBgn0008646,FBgn0008651,FBgn0010109,FBgn0010313,FBgn0011758,FBgn0015399,FBgn0015524,FBg…
post-embryonic appendage morphogenesis	5.08301e-09	FBgn0000179,FBgn0000233,FBgn0000490,FBgn0000577,FBgn0001235,FBgn0001987,FBgn0003866,FBgn0003870,FBgn0003984,FBgn0004644,FBgn0004892,FBgn0008651,FBgn0010313,FBgn0011591,FBgn0015904,FBgn0015919,FBgn0020307,FBgn0020378,FBgn0023095,FBgn0024250,FBgn0026411,FBgn0050115,FBgn0050456,FBgn0053196,FBgn0086655,FBgn0259172,FBgn0259730,FBgn0261563,FBgn0261648,FBgn0263118
imaginal disc morphogenesis	7.3243e-09	FBgn0000179,FBgn0000233,FBgn0000490,FBgn0000577,FBgn0001235,FBgn0001987,FBgn0003866,FBgn0003870,FBgn0003984,FBgn0004644,FBgn0004892,FBgn0004956,FBgn0008651,FBgn0010313,FBgn0011591,FBgn0011758,FBgn0015904,FBgn0015919,FBgn0020307,FBgn0020378,FBgn0023095,FBgn0024250,FBgn0026411,FBgn0050115,FBgn0050456,FBgn0053196,FBgn0086655,FBgn0259172,FBgn0259730,FBgn0261563,FBgn0261648,FBgn0263118
post-embryonic organ morphogenesis	7.3243e-09	FBgn0000179,FBgn0000233,FBgn0000490,FBgn0000577,FBgn0001235,FBgn0001987,FBgn0003866,FBgn0003870,FBgn0003984,FBgn0004644,FBgn0004892,FBgn0004956,FBgn0008651,FBgn0010313,FBgn0011591,FBgn0011758,FBgn0015904,FBgn0015919,FBgn0020307,FBgn0020378,FBgn0023095,FBgn0024250,FBgn0026411,FBgn0050115,FBgn0050456,FBgn0053196,FBgn0086655,FBgn0259172,FBgn0259730,FBgn0261563,FBgn0261648,FBgn0263118
post-embryonic organ development	7.90791e-09	FBgn0000179,FBgn0000233,FBgn0000490,FBgn0000577,FBgn0001235,FBgn0001987,FBgn0003866,FBgn0003870,FBgn0003984,FBgn0004644,FBgn0004892,FBgn0004956,FBgn0008651,FBgn0010313,FBgn0011591,FBgn0011758,FBgn0015904,FBgn0015919,FBgn0020307,FBgn0020378,FBgn0023095,FBgn0024189,FBgn0024250,FBgn0026411,FBgn0050115,FBgn0050456,FBgn0053196,FBgn0086655,FBgn0259172,FBgn0259730,FBgn0261563,FBgn0261648,FBgn0263118
organ morphogenesis	8.23913e-09	FBgn0000015,FBgn0000179,FBgn0000233,FBgn0000490,FBgn0000577,FBgn0001138,FBgn0001235,FBgn0001987,FBgn0002528,FBgn0002633,FBgn0003117,FBgn0003339,FBgn0003866,FBgn0003870,FBgn0003984,FBgn0004618,FBgn0004644,FBgn0004892,FBgn0004956,FBgn0005630,FBgn0008651,FBgn0010238,FBgn0010313,FBgn0011591,FBgn0011758,FBgn0015904,FBgn0015919,FBgn0020307,FBgn0020378,FBgn0023001,FBgn0023095,FBgn0024189,FBgn0024250,FBg…
proximal/distal pattern formation	1.50827e-08	FBgn0000459,FBgn0000490,FBgn0001235,FBgn0001987,FBgn0003866,FBgn0003984,FBgn0004644,FBgn0011758,FBgn0026411,FBgn0086655
leg disc pattern formation	1.94197e-08	FBgn0000459,FBgn0000490,FBgn0001235,FBgn0003866,FBgn0003984,FBgn0011758,FBgn0016660,FBgn0026411,FBgn0086655
RNA metabolic process	2.10126e-08	FBgn0000015,FBgn0000179,FBgn0000233,FBgn0000459,FBgn0000490,FBgn0000577,FBgn0001138,FBgn0001148,FBgn0001235,FBgn0001323,FBgn0002633,FBgn0003117,FBgn0003339,FBgn0003459,FBgn0003866,FBgn0003870,FBgn0004567,FBgn0004606,FBgn0004618,FBgn0004644,FBgn0004860,FBgn0004861,FBgn0004892,FBgn0005630,FBgn0005638,FBgn0008646,FBgn0008651,FBgn0010109,FBgn0010313,FBgn0011758,FBgn0015524,FBgn0015904,FBgn0015919,FBg…
single-organism developmental process	3.24881e-08	FBgn0000015,FBgn0000179,FBgn0000180,FBgn0000233,FBgn0000451,FBgn0000459,FBgn0000490,FBgn0000577,FBgn0001138,FBgn0001148,FBgn0001235,FBgn0001323,FBgn0001987,FBgn0002528,FBgn0002633,FBgn0003117,FBgn0003292,FBgn0003339,FBgn0003435,FBgn0003459,FBgn0003495,FBgn0003866,FBgn0003870,FBgn0003984,FBgn0004028,FBgn0004567,FBgn0004606,FBgn0004618,FBgn0004644,FBgn0004858,FBgn0004860,FBgn0004861,FBgn0004892,FBg…
imaginal disc pattern formation	3.88824e-08	FBgn0000015,FBgn0000179,FBgn0000459,FBgn0000490,FBgn0000577,FBgn0001235,FBgn0003866,FBgn0003984,FBgn0004644,FBgn0011591,FBgn0011758,FBgn0016660,FBgn0026411,FBgn0039709,FBgn0086655,FBgn0262368,FBgn0262447
biological regulation	4.40886e-08	FBgn0000015,FBgn0000179,FBgn0000180,FBgn0000233,FBgn0000459,FBgn0000490,FBgn0000577,FBgn0001138,FBgn0001148,FBgn0001235,FBgn0001323,FBgn0001987,FBgn0002633,FBgn0003117,FBgn0003292,FBgn0003339,FBgn0003459,FBgn0003495,FBgn0003710,FBgn0003866,FBgn0003870,FBgn0003984,FBgn0004028,FBgn0004567,FBgn0004606,FBgn0004618,FBgn0004644,FBgn0004858,FBgn0004860,FBgn0004861,FBgn0004892,FBgn0004956,FBgn0004959,FBg…
tissue development	6.66209e-08	FBgn0000015,FBgn0000180,FBgn0000490,FBgn0001138,FBgn0001987,FBgn0002528,FBgn0003117,FBgn0003866,FBgn0003870,FBgn0004028,FBgn0004567,FBgn0004606,FBgn0004644,FBgn0004861,FBgn0004956,FBgn0005630,FBgn0008651,FBgn0010238,FBgn0010313,FBgn0015904,FBgn0015919,FBgn0023001,FBgn0023095,FBgn0038341,FBgn0039704,FBgn0086655,FBgn0259730,FBgn0259731,FBgn0259732,FBgn0259733,FBgn0261563,FBgn0261930,FBgn0263118,FBg…
instar larval or pupal development	6.81365e-08	FBgn0000179,FBgn0000233,FBgn0000490,FBgn0000577,FBgn0001235,FBgn0001987,FBgn0003866,FBgn0003870,FBgn0003984,FBgn0004644,FBgn0004892,FBgn0004956,FBgn0004959,FBgn0008651,FBgn0010313,FBgn0011591,FBgn0011758,FBgn0015904,FBgn0015919,FBgn0020307,FBgn0020378,FBgn0023095,FBgn0023179,FBgn0024250,FBgn0026411,FBgn0037207,FBgn0038341,FBgn0050115,FBgn0050456,FBgn0053196,FBgn0086655,FBgn0259172,FBgn0259730,FBg…
regulation of metabolic process	7.07367e-08	FBgn0000015,FBgn0000179,FBgn0000233,FBgn0000459,FBgn0000490,FBgn0000577,FBgn0001138,FBgn0001148,FBgn0001235,FBgn0001323,FBgn0002633,FBgn0003117,FBgn0003339,FBgn0003459,FBgn0003495,FBgn0003866,FBgn0003870,FBgn0004567,FBgn0004606,FBgn0004618,FBgn0004644,FBgn0004858,FBgn0004860,FBgn0004861,FBgn0004892,FBgn0005630,FBgn0005638,FBgn0008646,FBgn0008651,FBgn0010109,FBgn0010313,FBgn0011758,FBgn0015399,FBg…
developmental process	7.40436e-08	FBgn0000015,FBgn0000179,FBgn0000180,FBgn0000233,FBgn0000451,FBgn0000459,FBgn0000490,FBgn0000577,FBgn0001138,FBgn0001148,FBgn0001235,FBgn0001323,FBgn0001987,FBgn0002528,FBgn0002633,FBgn0003117,FBgn0003292,FBgn0003339,FBgn0003435,FBgn0003459,FBgn0003495,FBgn0003866,FBgn0003870,FBgn0003984,FBgn0004028,FBgn0004567,FBgn0004606,FBgn0004618,FBgn0004644,FBgn0004858,FBgn0004860,FBgn0004861,FBgn0004892,FBg…
post-embryonic development	7.53064e-08	FBgn0000179,FBgn0000233,FBgn0000490,FBgn0000577,FBgn0001235,FBgn0001987,FBgn0003866,FBgn0003870,FBgn0003984,FBgn0004644,FBgn0004892,FBgn0004956,FBgn0004959,FBgn0008651,FBgn0010313,FBgn0011591,FBgn0011758,FBgn0015904,FBgn0015919,FBgn0020307,FBgn0020378,FBgn0023095,FBgn0023179,FBgn0024189,FBgn0024250,FBgn0026411,FBgn0037207,FBgn0038341,FBgn0050115,FBgn0050456,FBgn0053196,FBgn0086655,FBgn0259172,FBg…
cell fate specification	8.11703e-08	FBgn0000015,FBgn0000490,FBgn0001235,FBgn0003870,FBgn0003984,FBgn0004567,FBgn0004644,FBgn0005638,FBgn0008651,FBgn0011591,FBgn0015904,FBgn0016660,FBgn0023001,FBgn0035626,FBgn0261648
regulation of cellular process	8.52051e-08	FBgn0000015,FBgn0000179,FBgn0000180,FBgn0000233,FBgn0000459,FBgn0000490,FBgn0000577,FBgn0001138,FBgn0001148,FBgn0001235,FBgn0001323,FBgn0002633,FBgn0003117,FBgn0003339,FBgn0003459,FBgn0003495,FBgn0003866,FBgn0003870,FBgn0003984,FBgn0004567,FBgn0004606,FBgn0004618,FBgn0004644,FBgn0004858,FBgn0004860,FBgn0004861,FBgn0004892,FBgn0004956,FBgn0005630,FBgn0005638,FBgn0008646,FBgn0008651,FBgn0010109,FBg…
proximal/distal pattern formation, imaginal disc	1.00285e-07	FBgn0000459,FBgn0000490,FBgn0001235,FBgn0003866,FBgn0003984,FBgn0004644,FBgn0011758,FBgn0026411,FBgn0086655
negative regulation of transcription from RNA polymerase II promoter	1.01713e-07	FBgn0000179,FBgn0000233,FBgn0000577,FBgn0002633,FBgn0003117,FBgn0003866,FBgn0003870,FBgn0004567,FBgn0004606,FBgn0010109,FBgn0011758,FBgn0020307,FBgn0024250,FBgn0035625,FBgn0086655,FBgn0259172,FBgn0261930,FBgn0263511
post-embryonic morphogenesis	1.23852e-07	FBgn0000179,FBgn0000233,FBgn0000490,FBgn0000577,FBgn0001235,FBgn0001987,FBgn0003866,FBgn0003870,FBgn0003984,FBgn0004644,FBgn0004892,FBgn0004956,FBgn0008651,FBgn0010313,FBgn0011591,FBgn0011758,FBgn0015904,FBgn0015919,FBgn0020307,FBgn0020378,FBgn0023095,FBgn0024250,FBgn0026411,FBgn0038341,FBgn0050115,FBgn0050456,FBgn0053196,FBgn0086655,FBgn0259172,FBgn0259730,FBgn0261563,FBgn0261648,FBgn0263118
regulation of biological process	1.31628e-07	FBgn0000015,FBgn0000179,FBgn0000180,FBgn0000233,FBgn0000459,FBgn0000490,FBgn0000577,FBgn0001138,FBgn0001148,FBgn0001235,FBgn0001323,FBgn0002633,FBgn0003117,FBgn0003339,FBgn0003459,FBgn0003495,FBgn0003710,FBgn0003866,FBgn0003870,FBgn0003984,FBgn0004567,FBgn0004606,FBgn0004618,FBgn0004644,FBgn0004858,FBgn0004860,FBgn0004861,FBgn0004892,FBgn0004956,FBgn0005630,FBgn0005638,FBgn0008646,FBgn0008651,FBg…
instar larval or pupal morphogenesis	3.35662e-07	FBgn0000179,FBgn0000233,FBgn0000490,FBgn0000577,FBgn0001235,FBgn0001987,FBgn0003866,FBgn0003870,FBgn0003984,FBgn0004644,FBgn0004892,FBgn0004956,FBgn0008651,FBgn0010313,FBgn0011591,FBgn0011758,FBgn0015904,FBgn0015919,FBgn0020307,FBgn0020378,FBgn0023095,FBgn0024250,FBgn0026411,FBgn0050115,FBgn0050456,FBgn0053196,FBgn0086655,FBgn0259172,FBgn0259730,FBgn0261563,FBgn0261648,FBgn0263118
leg disc proximal/distal pattern formation	3.50784e-07	FBgn0000459,FBgn0000490,FBgn0001235,FBgn0003866,FBgn0003984,FBgn0011758,FBgn0026411,FBgn0086655
multicellular organismal development	6.13024e-07	FBgn0000015,FBgn0000179,FBgn0000180,FBgn0000233,FBgn0000451,FBgn0000459,FBgn0000490,FBgn0000577,FBgn0001138,FBgn0001148,FBgn0001235,FBgn0001323,FBgn0001987,FBgn0002528,FBgn0002633,FBgn0003117,FBgn0003292,FBgn0003339,FBgn0003435,FBgn0003495,FBgn0003866,FBgn0003870,FBgn0003984,FBgn0004028,FBgn0004567,FBgn0004606,FBgn0004618,FBgn0004644,FBgn0004858,FBgn0004860,FBgn0004861,FBgn0004892,FBgn0004956,FBg…
metamorphosis	1.15127e-06	FBgn0000179,FBgn0000233,FBgn0000490,FBgn0000577,FBgn0001235,FBgn0001987,FBgn0003866,FBgn0003870,FBgn0003984,FBgn0004644,FBgn0004892,FBgn0004956,FBgn0008651,FBgn0010313,FBgn0011591,FBgn0011758,FBgn0015904,FBgn0015919,FBgn0020307,FBgn0020378,FBgn0023095,FBgn0024250,FBgn0026411,FBgn0050115,FBgn0050456,FBgn0053196,FBgn0086655,FBgn0259172,FBgn0259730,FBgn0261563,FBgn0261648,FBgn0263118
cell fate commitment	1.41357e-06	FBgn0000015,FBgn0000180,FBgn0000490,FBgn0000577,FBgn0001235,FBgn0001323,FBgn0003117,FBgn0003459,FBgn0003870,FBgn0003984,FBgn0004567,FBgn0004618,FBgn0004644,FBgn0005630,FBgn0005638,FBgn0008651,FBgn0011591,FBgn0011674,FBgn0015524,FBgn0015904,FBgn0015919,FBgn0016660,FBgn0023001,FBgn0023095,FBgn0028789,FBgn0035626,FBgn0053196,FBgn0261648,FBgn0261930
single-multicellular organism process	2.02444e-06	FBgn0000015,FBgn0000179,FBgn0000180,FBgn0000233,FBgn0000451,FBgn0000459,FBgn0000490,FBgn0000577,FBgn0001138,FBgn0001148,FBgn0001235,FBgn0001323,FBgn0001987,FBgn0002528,FBgn0002633,FBgn0003117,FBgn0003292,FBgn0003339,FBgn0003435,FBgn0003459,FBgn0003495,FBgn0003866,FBgn0003870,FBgn0003984,FBgn0004028,FBgn0004567,FBgn0004606,FBgn0004618,FBgn0004644,FBgn0004858,FBgn0004860,FBgn0004861,FBgn0004892,FBg…
leg disc morphogenesis	2.55953e-06	FBgn0000233,FBgn0001235,FBgn0003866,FBgn0004644,FBgn0004892,FBgn0008651,FBgn0011591,FBgn0020307,FBgn0020378,FBgn0026411,FBgn0050115,FBgn0050456,FBgn0259172
negative regulation of transcription, DNA-templated	2.71079e-06	FBgn0000179,FBgn0000233,FBgn0000577,FBgn0002633,FBgn0003117,FBgn0003459,FBgn0003866,FBgn0003870,FBgn0004567,FBgn0004606,FBgn0004860,FBgn0004861,FBgn0010109,FBgn0010313,FBgn0011758,FBgn0020307,FBgn0024250,FBgn0026411,FBgn0035625,FBgn0086655,FBgn0259172,FBgn0261648,FBgn0261930,FBgn0263511
positive regulation of transcription, DNA-templated	3.81922e-06	FBgn0000015,FBgn0000233,FBgn0000459,FBgn0001235,FBgn0003117,FBgn0003339,FBgn0003870,FBgn0004567,FBgn0004618,FBgn0005630,FBgn0005638,FBgn0015904,FBgn0015919,FBgn0016660,FBgn0026160,FBgn0026411,FBgn0028789,FBgn0084245,FBgn0086655,FBgn0261930,FBgn0265784
positive regulation of nitrogen compound metabolic process	3.82093e-06	FBgn0000015,FBgn0000233,FBgn0000459,FBgn0001235,FBgn0003117,FBgn0003339,FBgn0003495,FBgn0003870,FBgn0004567,FBgn0004618,FBgn0005630,FBgn0005638,FBgn0015904,FBgn0015919,FBgn0016660,FBgn0026160,FBgn0026411,FBgn0028789,FBgn0038063,FBgn0084245,FBgn0086655,FBgn0261930,FBgn0265784
positive regulation of nucleobase-containing compound metabolic process	4.3377e-06	FBgn0000015,FBgn0000233,FBgn0000459,FBgn0001235,FBgn0003117,FBgn0003339,FBgn0003870,FBgn0004567,FBgn0004618,FBgn0005630,FBgn0005638,FBgn0015904,FBgn0015919,FBgn0016660,FBgn0026160,FBgn0026411,FBgn0028789,FBgn0038063,FBgn0084245,FBgn0086655,FBgn0261930,FBgn0265784
negative regulation of RNA metabolic process	4.59238e-06	FBgn0000179,FBgn0000233,FBgn0000577,FBgn0002633,FBgn0003117,FBgn0003459,FBgn0003866,FBgn0003870,FBgn0004567,FBgn0004606,FBgn0004860,FBgn0004861,FBgn0010109,FBgn0010313,FBgn0011758,FBgn0020307,FBgn0024250,FBgn0026411,FBgn0035625,FBgn0086655,FBgn0259172,FBgn0261648,FBgn0261930,FBgn0263511
segment specification	5.07955e-06	FBgn0000015,FBgn0000233,FBgn0001235,FBgn0003292,FBgn0003339,FBgn0003866,FBgn0004567,FBgn0015524,FBgn0039283,FBgn0086655,FBgn0261648
positive regulation of gene expression	6.59031e-06	FBgn0000015,FBgn0000233,FBgn0000459,FBgn0001235,FBgn0003117,FBgn0003339,FBgn0003870,FBgn0004567,FBgn0004618,FBgn0005630,FBgn0005638,FBgn0015904,FBgn0015919,FBgn0016660,FBgn0026160,FBgn0026411,FBgn0028789,FBgn0084245,FBgn0086655,FBgn0261930,FBgn0265784
positive regulation of biosynthetic process	6.98758e-06	FBgn0000015,FBgn0000233,FBgn0000459,FBgn0001235,FBgn0003117,FBgn0003339,FBgn0003495,FBgn0003870,FBgn0004567,FBgn0004618,FBgn0005630,FBgn0005638,FBgn0015904,FBgn0015919,FBgn0016660,FBgn0026160,FBgn0026411,FBgn0028789,FBgn0038063,FBgn0084245,FBgn0086655,FBgn0261930,FBgn0265784
positive regulation of cellular biosynthetic process	6.98758e-06	FBgn0000015,FBgn0000233,FBgn0000459,FBgn0001235,FBgn0003117,FBgn0003339,FBgn0003495,FBgn0003870,FBgn0004567,FBgn0004618,FBgn0005630,FBgn0005638,FBgn0015904,FBgn0015919,FBgn0016660,FBgn0026160,FBgn0026411,FBgn0028789,FBgn0038063,FBgn0084245,FBgn0086655,FBgn0261930,FBgn0265784
negative regulation of nucleobase-containing compound metabolic process	1.06548e-05	FBgn0000179,FBgn0000233,FBgn0000577,FBgn0002633,FBgn0003117,FBgn0003459,FBgn0003866,FBgn0003870,FBgn0004567,FBgn0004606,FBgn0004860,FBgn0004861,FBgn0010109,FBgn0010313,FBgn0011758,FBgn0020307,FBgn0024250,FBgn0026411,FBgn0035625,FBgn0086655,FBgn0259172,FBgn0261648,FBgn0261930,FBgn0263511
positive regulation of RNA metabolic process	1.11524e-05	FBgn0000015,FBgn0000233,FBgn0000459,FBgn0001235,FBgn0003117,FBgn0003339,FBgn0003870,FBgn0004567,FBgn0004618,FBgn0005630,FBgn0005638,FBgn0015904,FBgn0015919,FBgn0016660,FBgn0026160,FBgn0026411,FBgn0028789,FBgn0084245,FBgn0086655,FBgn0261930,FBgn0265784
negative regulation of nitrogen compound metabolic process	1.25392e-05	FBgn0000179,FBgn0000233,FBgn0000577,FBgn0002633,FBgn0003117,FBgn0003459,FBgn0003866,FBgn0003870,FBgn0004567,FBgn0004606,FBgn0004860,FBgn0004861,FBgn0010109,FBgn0010313,FBgn0011758,FBgn0020307,FBgn0024250,FBgn0026411,FBgn0035625,FBgn0086655,FBgn0259172,FBgn0261648,FBgn0261930,FBgn0263511
positive regulation of macromolecule biosynthetic process	2.52353e-05	FBgn0000015,FBgn0000233,FBgn0000459,FBgn0001235,FBgn0003117,FBgn0003339,FBgn0003870,FBgn0004567,FBgn0004618,FBgn0005630,FBgn0005638,FBgn0015904,FBgn0015919,FBgn0016660,FBgn0026160,FBgn0026411,FBgn0028789,FBgn0084245,FBgn0086655,FBgn0261930,FBgn0265784
imaginal disc-derived leg morphogenesis	2.75397e-05	FBgn0000233,FBgn0001235,FBgn0003866,FBgn0004892,FBgn0008651,FBgn0011591,FBgn0020307,FBgn0020378,FBgn0026411,FBgn0050115,FBgn0050456,FBgn0259172
negative regulation of gene expression	3.06126e-05	FBgn0000179,FBgn0000233,FBgn0000490,FBgn0000577,FBgn0002633,FBgn0003117,FBgn0003459,FBgn0003866,FBgn0003870,FBgn0004567,FBgn0004606,FBgn0004858,FBgn0004860,FBgn0004861,FBgn0010109,FBgn0010313,FBgn0011758,FBgn0020307,FBgn0024250,FBgn0026411,FBgn0035625,FBgn0086655,FBgn0259172,FBgn0261648,FBgn0261930,FBgn0263511
nucleic acid metabolic process	3.15145e-05	FBgn0000015,FBgn0000179,FBgn0000233,FBgn0000459,FBgn0000490,FBgn0000577,FBgn0001138,FBgn0001148,FBgn0001235,FBgn0001323,FBgn0002633,FBgn0003117,FBgn0003339,FBgn0003459,FBgn0003866,FBgn0003870,FBgn0004567,FBgn0004606,FBgn0004618,FBgn0004644,FBgn0004860,FBgn0004861,FBgn0004892,FBgn0005630,FBgn0005638,FBgn0008646,FBgn0008651,FBgn0010109,FBgn0010313,FBgn0011758,FBgn0015524,FBgn0015904,FBgn0015919,FBg…
positive regulation of transcription from RNA polymerase II promoter	3.63876e-05	FBgn0000015,FBgn0000233,FBgn0000459,FBgn0001235,FBgn0003117,FBgn0003339,FBgn0003870,FBgn0004567,FBgn0004618,FBgn0005638,FBgn0015904,FBgn0015919,FBgn0016660,FBgn0028789,FBgn0086655,FBgn0261930,FBgn0265784
head segmentation	3.86487e-05	FBgn0000233,FBgn0000577,FBgn0001235,FBgn0003339,FBgn0003866,FBgn0004567,FBgn0004644,FBgn0086655
wing disc development	3.96156e-05	FBgn0000179,FBgn0000490,FBgn0000577,FBgn0001235,FBgn0001987,FBgn0003866,FBgn0003870,FBgn0003984,FBgn0004644,FBgn0004858,FBgn0010313,FBgn0011591,FBgn0015904,FBgn0015919,FBgn0020307,FBgn0023095,FBgn0024250,FBgn0028789,FBgn0039709,FBgn0050115,FBgn0053196,FBgn0086655,FBgn0259730,FBgn0261563,FBgn0261648,FBgn0262368,FBgn0262447,FBgn0263118
negative regulation of macromolecule biosynthetic process	4.81094e-05	FBgn0000179,FBgn0000233,FBgn0000577,FBgn0002633,FBgn0003117,FBgn0003459,FBgn0003866,FBgn0003870,FBgn0004567,FBgn0004606,FBgn0004860,FBgn0004861,FBgn0010109,FBgn0010313,FBgn0011758,FBgn0020307,FBgn0024250,FBgn0026411,FBgn0035625,FBgn0086655,FBgn0259172,FBgn0261648,FBgn0261930,FBgn0263511
negative regulation of cellular macromolecule biosynthetic process	4.81094e-05	FBgn0000179,FBgn0000233,FBgn0000577,FBgn0002633,FBgn0003117,FBgn0003459,FBgn0003866,FBgn0003870,FBgn0004567,FBgn0004606,FBgn0004860,FBgn0004861,FBgn0010109,FBgn0010313,FBgn0011758,FBgn0020307,FBgn0024250,FBgn0026411,FBgn0035625,FBgn0086655,FBgn0259172,FBgn0261648,FBgn0261930,FBgn0263511
imaginal disc-derived wing morphogenesis	5.13199e-05	FBgn0000179,FBgn0000490,FBgn0000577,FBgn0001235,FBgn0001987,FBgn0003866,FBgn0003870,FBgn0003984,FBgn0004644,FBgn0010313,FBgn0011591,FBgn0015904,FBgn0015919,FBgn0020307,FBgn0023095,FBgn0024250,FBgn0050115,FBgn0053196,FBgn0086655,FBgn0259730,FBgn0261563,FBgn0261648,FBgn0263118
imaginal disc-derived wing vein specification	5.60384e-05	FBgn0000490,FBgn0000577,FBgn0003984,FBgn0004644,FBgn0010313,FBgn0015904,FBgn0015919,FBgn0050115,FBgn0086655,FBgn0263118
negative regulation of biosynthetic process	6.77313e-05	FBgn0000179,FBgn0000233,FBgn0000577,FBgn0002633,FBgn0003117,FBgn0003459,FBgn0003866,FBgn0003870,FBgn0004567,FBgn0004606,FBgn0004860,FBgn0004861,FBgn0010109,FBgn0010313,FBgn0011758,FBgn0020307,FBgn0024250,FBgn0026411,FBgn0035625,FBgn0086655,FBgn0259172,FBgn0261648,FBgn0261930,FBgn0263511
negative regulation of cellular biosynthetic process	6.77313e-05	FBgn0000179,FBgn0000233,FBgn0000577,FBgn0002633,FBgn0003117,FBgn0003459,FBgn0003866,FBgn0003870,FBgn0004567,FBgn0004606,FBgn0004860,FBgn0004861,FBgn0010109,FBgn0010313,FBgn0011758,FBgn0020307,FBgn0024250,FBgn0026411,FBgn0035625,FBgn0086655,FBgn0259172,FBgn0261648,FBgn0261930,FBgn0263511
wing disc morphogenesis	6.97864e-05	FBgn0000179,FBgn0000490,FBgn0000577,FBgn0001235,FBgn0001987,FBgn0003866,FBgn0003870,FBgn0003984,FBgn0004644,FBgn0010313,FBgn0011591,FBgn0015904,FBgn0015919,FBgn0020307,FBgn0023095,FBgn0024250,FBgn0050115,FBgn0053196,FBgn0086655,FBgn0259730,FBgn0261563,FBgn0261648,FBgn0263118
head development	7.07795e-05	FBgn0000233,FBgn0000577,FBgn0001235,FBgn0003339,FBgn0003866,FBgn0004567,FBgn0004644,FBgn0086655
locomotion	0.000148661	FBgn0000015,FBgn0000490,FBgn0000577,FBgn0001138,FBgn0001323,FBgn0001987,FBgn0002633,FBgn0003435,FBgn0003495,FBgn0003870,FBgn0003984,FBgn0004567,FBgn0004606,FBgn0004644,FBgn0004956,FBgn0005630,FBgn0005638,FBgn0008651,FBgn0013972,FBgn0016920,FBgn0023095,FBgn0028645,FBgn0032629,FBgn0038341,FBgn0085408,FBgn0086655,FBgn0087007,FBgn0261563,FBgn0261648
negative regulation of macromolecule metabolic process	0.00021024	FBgn0000179,FBgn0000233,FBgn0000490,FBgn0000577,FBgn0002633,FBgn0003117,FBgn0003459,FBgn0003866,FBgn0003870,FBgn0004567,FBgn0004606,FBgn0004644,FBgn0004858,FBgn0004860,FBgn0004861,FBgn0010109,FBgn0010313,FBgn0011758,FBgn0015399,FBgn0020307,FBgn0024250,FBgn0026411,FBgn0035625,FBgn0086655,FBgn0259172,FBgn0261648,FBgn0261930,FBgn0263511
negative regulation of cellular metabolic process	0.000216972	FBgn0000179,FBgn0000233,FBgn0000577,FBgn0002633,FBgn0003117,FBgn0003459,FBgn0003866,FBgn0003870,FBgn0004567,FBgn0004606,FBgn0004644,FBgn0004860,FBgn0004861,FBgn0010109,FBgn0010313,FBgn0011758,FBgn0015399,FBgn0020307,FBgn0024250,FBgn0026411,FBgn0035625,FBgn0086655,FBgn0259172,FBgn0261648,FBgn0261930,FBgn0263511
embryo development	0.000231689	FBgn0000015,FBgn0000233,FBgn0000490,FBgn0000577,FBgn0001148,FBgn0001235,FBgn0002528,FBgn0003117,FBgn0003292,FBgn0003339,FBgn0003495,FBgn0003866,FBgn0003870,FBgn0004567,FBgn0004606,FBgn0004644,FBgn0004860,FBgn0004861,FBgn0004956,FBgn0004959,FBgn0008651,FBgn0010238,FBgn0016660,FBgn0024189,FBgn0028789,FBgn0037207,FBgn0038341,FBgn0039704,FBgn0086655,FBgn0261563,FBgn0265274
positive regulation of biological process	0.000256613	FBgn0000015,FBgn0000233,FBgn0000459,FBgn0000490,FBgn0001235,FBgn0003117,FBgn0003339,FBgn0003495,FBgn0003870,FBgn0003984,FBgn0004567,FBgn0004618,FBgn0004644,FBgn0004956,FBgn0005630,FBgn0005638,FBgn0010109,FBgn0011591,FBgn0015904,FBgn0015919,FBgn0016660,FBgn0022800,FBgn0026160,FBgn0026411,FBgn0028789,FBgn0035153,FBgn0038063,FBgn0050456,FBgn0053542,FBgn0084245,FBgn0086655,FBgn0261930,FBgn0263111,FBg…
segmentation	0.000286011	FBgn0000015,FBgn0000233,FBgn0000490,FBgn0000577,FBgn0001148,FBgn0001235,FBgn0003117,FBgn0003292,FBgn0003339,FBgn0003866,FBgn0004567,FBgn0004644,FBgn0004892,FBgn0004956,FBgn0011591,FBgn0015524,FBgn0020307,FBgn0039283,FBgn0086655,FBgn0261648
positive regulation of cellular process	0.000378562	FBgn0000015,FBgn0000233,FBgn0000459,FBgn0001235,FBgn0003117,FBgn0003339,FBgn0003495,FBgn0003870,FBgn0003984,FBgn0004567,FBgn0004618,FBgn0004644,FBgn0004956,FBgn0005630,FBgn0005638,FBgn0010109,FBgn0011591,FBgn0015904,FBgn0015919,FBgn0016660,FBgn0026160,FBgn0026411,FBgn0028789,FBgn0035153,FBgn0038063,FBgn0050456,FBgn0053542,FBgn0084245,FBgn0086655,FBgn0261930,FBgn0263111,FBgn0263511,FBgn0265784
cellular macromolecule biosynthetic process	0.000642185	FBgn0000015,FBgn0000179,FBgn0000233,FBgn0000459,FBgn0000490,FBgn0000577,FBgn0001138,FBgn0001148,FBgn0001235,FBgn0001323,FBgn0002633,FBgn0003117,FBgn0003292,FBgn0003339,FBgn0003459,FBgn0003866,FBgn0003870,FBgn0004567,FBgn0004606,FBgn0004618,FBgn0004644,FBgn0004860,FBgn0004861,FBgn0004892,FBgn0005630,FBgn0005638,FBgn0008646,FBgn0008651,FBgn0010109,FBgn0010313,FBgn0011591,FBgn0011758,FBgn0015524,FBg…
multicellular organismal process	0.000668797	FBgn0000015,FBgn0000179,FBgn0000180,FBgn0000233,FBgn0000451,FBgn0000459,FBgn0000490,FBgn0000577,FBgn0001138,FBgn0001148,FBgn0001235,FBgn0001323,FBgn0001987,FBgn0002528,FBgn0002633,FBgn0003117,FBgn0003292,FBgn0003339,FBgn0003435,FBgn0003459,FBgn0003495,FBgn0003710,FBgn0003866,FBgn0003870,FBgn0003984,FBgn0004028,FBgn0004567,FBgn0004606,FBgn0004618,FBgn0004644,FBgn0004858,FBgn0004860,FBgn0004861,FBg…
macromolecule biosynthetic process	0.000731025	FBgn0000015,FBgn0000179,FBgn0000233,FBgn0000459,FBgn0000490,FBgn0000577,FBgn0001138,FBgn0001148,FBgn0001235,FBgn0001323,FBgn0002633,FBgn0003117,FBgn0003292,FBgn0003339,FBgn0003459,FBgn0003866,FBgn0003870,FBgn0004567,FBgn0004606,FBgn0004618,FBgn0004644,FBgn0004860,FBgn0004861,FBgn0004892,FBgn0005630,FBgn0005638,FBgn0008646,FBgn0008651,FBgn0010109,FBgn0010313,FBgn0011591,FBgn0011758,FBgn0015524,FBg…
negative regulation of metabolic process	0.000773367	FBgn0000179,FBgn0000233,FBgn0000490,FBgn0000577,FBgn0002633,FBgn0003117,FBgn0003459,FBgn0003866,FBgn0003870,FBgn0004567,FBgn0004606,FBgn0004644,FBgn0004858,FBgn0004860,FBgn0004861,FBgn0010109,FBgn0010313,FBgn0011758,FBgn0015399,FBgn0020307,FBgn0024250,FBgn0026411,FBgn0035625,FBgn0086655,FBgn0259172,FBgn0261648,FBgn0261930,FBgn0263511
positive regulation of cellular metabolic process	0.000784048	FBgn0000015,FBgn0000233,FBgn0000459,FBgn0001235,FBgn0003117,FBgn0003339,FBgn0003495,FBgn0003870,FBgn0004567,FBgn0004618,FBgn0005630,FBgn0005638,FBgn0015904,FBgn0015919,FBgn0016660,FBgn0026160,FBgn0026411,FBgn0028789,FBgn0038063,FBgn0084245,FBgn0086655,FBgn0261930,FBgn0265784
cell migration	0.000835152	FBgn0000015,FBgn0000490,FBgn0001323,FBgn0001987,FBgn0003870,FBgn0003984,FBgn0004606,FBgn0004644,FBgn0004956,FBgn0005638,FBgn0008651,FBgn0023095,FBgn0038341,FBgn0085408,FBgn0086655,FBgn0087007,FBgn0261563,FBgn0261648
formation of anatomical boundary	0.00113122	FBgn0000015,FBgn0000490,FBgn0001235,FBgn0003339,FBgn0003866,FBgn0011758,FBgn0015904,FBgn0015919,FBgn0024250
positive regulation of macromolecule metabolic process	0.00113615	FBgn0000015,FBgn0000233,FBgn0000459,FBgn0001235,FBgn0003117,FBgn0003339,FBgn0003870,FBgn0004567,FBgn0004618,FBgn0005630,FBgn0005638,FBgn0015904,FBgn0015919,FBgn0016660,FBgn0026160,FBgn0026411,FBgn0028789,FBgn0084245,FBgn0086655,FBgn0261930,FBgn0265784
specification of segmental identity, head	0.0011584	FBgn0000233,FBgn0001235,FBgn0003339,FBgn0003866,FBgn0004567,FBgn0086655
positive regulation of metabolic process	0.00124274	FBgn0000015,FBgn0000233,FBgn0000459,FBgn0001235,FBgn0003117,FBgn0003339,FBgn0003495,FBgn0003870,FBgn0004567,FBgn0004618,FBgn0005630,FBgn0005638,FBgn0015904,FBgn0015919,FBgn0016660,FBgn0026160,FBgn0026411,FBgn0028789,FBgn0038063,FBgn0084245,FBgn0086655,FBgn0261930,FBgn0265784
cell adhesion	0.00172765	FBgn0000180,FBgn0001987,FBgn0010238,FBgn0022800,FBgn0023095,FBgn0024189,FBgn0028645,FBgn0030617,FBgn0032629,FBgn0039584,FBgn0039709,FBgn0051004,FBgn0053179,FBgn0261053,FBgn0261563,FBgn0263118
cell motility	0.00179697	FBgn0000015,FBgn0000490,FBgn0001323,FBgn0001987,FBgn0003870,FBgn0003984,FBgn0004606,FBgn0004644,FBgn0004956,FBgn0005638,FBgn0008651,FBgn0023095,FBgn0038341,FBgn0085408,FBgn0086655,FBgn0087007,FBgn0261563,FBgn0261648
central nervous system development	0.00198173	FBgn0000459,FBgn0000577,FBgn0001148,FBgn0001235,FBgn0002633,FBgn0003870,FBgn0003984,FBgn0004606,FBgn0004644,FBgn0004861,FBgn0005630,FBgn0008651,FBgn0015524,FBgn0039283,FBgn0053207,FBgn0086655,FBgn0261930
heart development	0.00218341	FBgn0000015,FBgn0000490,FBgn0001987,FBgn0003117,FBgn0004028,FBgn0004606,FBgn0004644,FBgn0008651,FBgn0010238,FBgn0016660,FBgn0028789
cell-cell adhesion	0.00241746	FBgn0000180,FBgn0010238,FBgn0022800,FBgn0023095,FBgn0024189,FBgn0028645,FBgn0032629,FBgn0039584,FBgn0039709,FBgn0053179,FBgn0261053
cardiovascular system development	0.00295346	FBgn0000015,FBgn0000490,FBgn0001987,FBgn0003117,FBgn0004028,FBgn0004606,FBgn0004644,FBgn0008651,FBgn0010238,FBgn0016660,FBgn0028789
circulatory system development	0.00295346	FBgn0000015,FBgn0000490,FBgn0001987,FBgn0003117,FBgn0004028,FBgn0004606,FBgn0004644,FBgn0008651,FBgn0010238,FBgn0016660,FBgn0028789
localization of cell	0.00301439	FBgn0000015,FBgn0000490,FBgn0001323,FBgn0001987,FBgn0003870,FBgn0003984,FBgn0004606,FBgn0004644,FBgn0004956,FBgn0005638,FBgn0008651,FBgn0023095,FBgn0038341,FBgn0085408,FBgn0086655,FBgn0087007,FBgn0261563,FBgn0261648
cell development	0.00380645	FBgn0000015,FBgn0000180,FBgn0000490,FBgn0000577,FBgn0001138,FBgn0001235,FBgn0001987,FBgn0002633,FBgn0003292,FBgn0003435,FBgn0003459,FBgn0003495,FBgn0003870,FBgn0003984,FBgn0004028,FBgn0004567,FBgn0004606,FBgn0004618,FBgn0004644,FBgn0004861,FBgn0004956,FBgn0005630,FBgn0005638,FBgn0008651,FBgn0010109,FBgn0010238,FBgn0011591,FBgn0011603,FBgn0015904,FBgn0016660,FBgn0020912,FBgn0023095,FBgn0024189,FBg…
cellular nitrogen compound metabolic process	0.00384187	FBgn0000015,FBgn0000179,FBgn0000233,FBgn0000459,FBgn0000490,FBgn0000577,FBgn0001138,FBgn0001148,FBgn0001235,FBgn0001323,FBgn0002633,FBgn0003117,FBgn0003339,FBgn0003459,FBgn0003495,FBgn0003866,FBgn0003870,FBgn0004567,FBgn0004606,FBgn0004618,FBgn0004644,FBgn0004860,FBgn0004861,FBgn0004892,FBgn0005630,FBgn0005638,FBgn0008646,FBgn0008651,FBgn0010109,FBgn0010313,FBgn0011758,FBgn0013972,FBgn0015524,FBg…
nucleobase-containing compound metabolic process	0.00398076	FBgn0000015,FBgn0000179,FBgn0000233,FBgn0000459,FBgn0000490,FBgn0000577,FBgn0001138,FBgn0001148,FBgn0001235,FBgn0001323,FBgn0002633,FBgn0003117,FBgn0003339,FBgn0003459,FBgn0003866,FBgn0003870,FBgn0004567,FBgn0004606,FBgn0004618,FBgn0004644,FBgn0004860,FBgn0004861,FBgn0004892,FBgn0005630,FBgn0005638,FBgn0008646,FBgn0008651,FBgn0010109,FBgn0010313,FBgn0011758,FBgn0013972,FBgn0015524,FBgn0015904,FBg…
biological adhesion	0.00418616	FBgn0000180,FBgn0001987,FBgn0010238,FBgn0022800,FBgn0023095,FBgn0024189,FBgn0028645,FBgn0030617,FBgn0032629,FBgn0039584,FBgn0039709,FBgn0051004,FBgn0053179,FBgn0261053,FBgn0261563,FBgn0263118
cellular component movement	0.00420379	FBgn0000015,FBgn0000490,FBgn0000577,FBgn0001138,FBgn0001323,FBgn0001987,FBgn0003435,FBgn0003495,FBgn0003870,FBgn0003984,FBgn0004567,FBgn0004606,FBgn0004644,FBgn0004956,FBgn0005630,FBgn0005638,FBgn0008651,FBgn0023095,FBgn0028645,FBgn0032629,FBgn0038341,FBgn0039704,FBgn0085408,FBgn0086655,FBgn0087007,FBgn0261563,FBgn0261648
salivary gland boundary specification	0.00441124	FBgn0000015,FBgn0000490,FBgn0001235,FBgn0003339,FBgn0003866,FBgn0024250
respiratory system development	0.0046837	FBgn0000015,FBgn0000490,FBgn0000577,FBgn0001323,FBgn0001987,FBgn0003870,FBgn0004644,FBgn0004858,FBgn0010238,FBgn0023095,FBgn0034718,FBgn0035625,FBgn0038341,FBgn0053196,FBgn0086655,FBgn0261648
organic substance biosynthetic process	0.00509982	FBgn0000015,FBgn0000179,FBgn0000233,FBgn0000459,FBgn0000490,FBgn0000577,FBgn0001138,FBgn0001148,FBgn0001235,FBgn0001323,FBgn0002633,FBgn0003117,FBgn0003292,FBgn0003339,FBgn0003459,FBgn0003495,FBgn0003866,FBgn0003870,FBgn0004567,FBgn0004606,FBgn0004618,FBgn0004644,FBgn0004860,FBgn0004861,FBgn0004892,FBgn0004959,FBgn0005630,FBgn0005638,FBgn0008646,FBgn0008651,FBgn0010109,FBgn0010313,FBgn0011591,FBg…
epithelium development	0.00559062	FBgn0000490,FBgn0001987,FBgn0003117,FBgn0003866,FBgn0003870,FBgn0004644,FBgn0004861,FBgn0004956,FBgn0005630,FBgn0010238,FBgn0010313,FBgn0015904,FBgn0015919,FBgn0023095,FBgn0039704,FBgn0259730,FBgn0259731,FBgn0259732,FBgn0259733,FBgn0265274
cellular aromatic compound metabolic process	0.00585026	FBgn0000015,FBgn0000179,FBgn0000233,FBgn0000459,FBgn0000490,FBgn0000577,FBgn0001138,FBgn0001148,FBgn0001235,FBgn0001323,FBgn0002633,FBgn0003117,FBgn0003339,FBgn0003459,FBgn0003866,FBgn0003870,FBgn0004567,FBgn0004606,FBgn0004618,FBgn0004644,FBgn0004860,FBgn0004861,FBgn0004892,FBgn0005630,FBgn0005638,FBgn0008646,FBgn0008651,FBgn0010109,FBgn0010313,FBgn0011758,FBgn0013972,FBgn0015524,FBgn0015904,FBg…
ectoderm development	0.00588692	FBgn0000180,FBgn0000490,FBgn0003117,FBgn0004644,FBgn0023001,FBgn0261930
nervous system development	0.00626022	FBgn0000180,FBgn0000459,FBgn0000577,FBgn0001138,FBgn0001148,FBgn0001235,FBgn0001987,FBgn0002633,FBgn0003435,FBgn0003495,FBgn0003870,FBgn0003984,FBgn0004028,FBgn0004567,FBgn0004606,FBgn0004618,FBgn0004644,FBgn0004861,FBgn0004956,FBgn0005630,FBgn0008651,FBgn0010109,FBgn0010238,FBgn0011603,FBgn0011674,FBgn0011758,FBgn0015399,FBgn0015524,FBgn0015904,FBgn0016660,FBgn0020912,FBgn0023001,FBgn0023095,FBg…
negative regulation of cellular process	0.00728503	FBgn0000015,FBgn0000179,FBgn0000233,FBgn0000490,FBgn0000577,FBgn0002633,FBgn0003117,FBgn0003459,FBgn0003866,FBgn0003870,FBgn0003984,FBgn0004567,FBgn0004606,FBgn0004644,FBgn0004860,FBgn0004861,FBgn0010109,FBgn0010313,FBgn0011591,FBgn0011758,FBgn0015399,FBgn0020307,FBgn0024250,FBgn0026411,FBgn0035625,FBgn0037015,FBgn0050169,FBgn0053207,FBgn0086655,FBgn0259172,FBgn0261648,FBgn0261930,FBgn0262447,FBg…
heterocycle metabolic process	0.00780748	FBgn0000015,FBgn0000179,FBgn0000233,FBgn0000459,FBgn0000490,FBgn0000577,FBgn0001138,FBgn0001148,FBgn0001235,FBgn0001323,FBgn0002633,FBgn0003117,FBgn0003339,FBgn0003459,FBgn0003866,FBgn0003870,FBgn0004567,FBgn0004606,FBgn0004618,FBgn0004644,FBgn0004860,FBgn0004861,FBgn0004892,FBgn0005630,FBgn0005638,FBgn0008646,FBgn0008651,FBgn0010109,FBgn0010313,FBgn0011758,FBgn0013972,FBgn0015524,FBgn0015904,FBg…
organic cyclic compound metabolic process	0.0078442	FBgn0000015,FBgn0000179,FBgn0000233,FBgn0000459,FBgn0000490,FBgn0000577,FBgn0001138,FBgn0001148,FBgn0001235,FBgn0001323,FBgn0002633,FBgn0003117,FBgn0003339,FBgn0003459,FBgn0003866,FBgn0003870,FBgn0004567,FBgn0004606,FBgn0004618,FBgn0004644,FBgn0004860,FBgn0004861,FBgn0004892,FBgn0004959,FBgn0005630,FBgn0005638,FBgn0008646,FBgn0008651,FBgn0010109,FBgn0010313,FBgn0011758,FBgn0013972,FBgn0015524,FBg…
cellular biosynthetic process	0.00862875	FBgn0000015,FBgn0000179,FBgn0000233,FBgn0000459,FBgn0000490,FBgn0000577,FBgn0001138,FBgn0001148,FBgn0001235,FBgn0001323,FBgn0002633,FBgn0003117,FBgn0003292,FBgn0003339,FBgn0003459,FBgn0003495,FBgn0003866,FBgn0003870,FBgn0004567,FBgn0004606,FBgn0004618,FBgn0004644,FBgn0004860,FBgn0004861,FBgn0004892,FBgn0004959,FBgn0005630,FBgn0005638,FBgn0008646,FBgn0008651,FBgn0010109,FBgn0010313,FBgn0011591,FBg…
single-organism process	0.00889298	FBgn0000015,FBgn0000179,FBgn0000180,FBgn0000233,FBgn0000451,FBgn0000459,FBgn0000490,FBgn0000577,FBgn0001138,FBgn0001148,FBgn0001235,FBgn0001323,FBgn0001987,FBgn0002528,FBgn0002633,FBgn0003117,FBgn0003137,FBgn0003292,FBgn0003339,FBgn0003435,FBgn0003459,FBgn0003495,FBgn0003710,FBgn0003866,FBgn0003870,FBgn0003984,FBgn0004028,FBgn0004567,FBgn0004606,FBgn0004618,FBgn0004644,FBgn0004858,FBgn0004860,FBg…
open tracheal system development	0.0110395	FBgn0000015,FBgn0000490,FBgn0000577,FBgn0001323,FBgn0001987,FBgn0003870,FBgn0004644,FBgn0004858,FBgn0010238,FBgn0023095,FBgn0035625,FBgn0038341,FBgn0053196,FBgn0086655,FBgn0261648
biosynthetic process	0.0114611	FBgn0000015,FBgn0000179,FBgn0000233,FBgn0000459,FBgn0000490,FBgn0000577,FBgn0001138,FBgn0001148,FBgn0001235,FBgn0001323,FBgn0002633,FBgn0003117,FBgn0003292,FBgn0003339,FBgn0003459,FBgn0003495,FBgn0003866,FBgn0003870,FBgn0004567,FBgn0004606,FBgn0004618,FBgn0004644,FBgn0004860,FBgn0004861,FBgn0004892,FBgn0004959,FBgn0005630,FBgn0005638,FBgn0008646,FBgn0008651,FBgn0010109,FBgn0010313,FBgn0011591,FBg…
muscle structure development	0.0123309	FBgn0000015,FBgn0000490,FBgn0001235,FBgn0003292,FBgn0003984,FBgn0004028,FBgn0004606,FBgn0008651,FBgn0011674,FBgn0015904,FBgn0015919,FBgn0024189,FBgn0035153,FBgn0261648,FBgn0263118
organ formation	0.0139026	FBgn0000015,FBgn0000490,FBgn0001235,FBgn0003339,FBgn0003866,FBgn0004644,FBgn0011758,FBgn0024250
cellular developmental process	0.0145903	FBgn0000015,FBgn0000180,FBgn0000490,FBgn0000577,FBgn0001138,FBgn0001235,FBgn0001323,FBgn0001987,FBgn0002633,FBgn0003117,FBgn0003292,FBgn0003435,FBgn0003459,FBgn0003495,FBgn0003866,FBgn0003870,FBgn0003984,FBgn0004028,FBgn0004567,FBgn0004606,FBgn0004618,FBgn0004644,FBgn0004861,FBgn0004956,FBgn0005630,FBgn0005638,FBgn0008651,FBgn0010109,FBgn0010238,FBgn0011591,FBgn0011603,FBgn0011674,FBgn0011758,FBg…
tissue morphogenesis	0.0151386	FBgn0000490,FBgn0003117,FBgn0003866,FBgn0003870,FBgn0004644,FBgn0004861,FBgn0004956,FBgn0005630,FBgn0008651,FBgn0010238,FBgn0015904,FBgn0015919,FBgn0023095,FBgn0038341,FBgn0259730,FBgn0259731,FBgn0259732,FBgn0259733,FBgn0265274
generation of neurons	0.0166549	FBgn0000577,FBgn0001138,FBgn0001235,FBgn0001987,FBgn0002633,FBgn0003435,FBgn0003495,FBgn0003870,FBgn0004567,FBgn0004606,FBgn0004618,FBgn0004644,FBgn0004861,FBgn0004956,FBgn0005630,FBgn0008651,FBgn0010109,FBgn0010238,FBgn0011674,FBgn0011758,FBgn0015904,FBgn0020912,FBgn0023001,FBgn0023095,FBgn0028645,FBgn0032629,FBgn0034718,FBgn0038874,FBgn0086655,FBgn0261648,FBgn0261930,FBgn0263239
cell differentiation	0.0194122	FBgn0000015,FBgn0000180,FBgn0000490,FBgn0000577,FBgn0001138,FBgn0001235,FBgn0001323,FBgn0001987,FBgn0002633,FBgn0003117,FBgn0003292,FBgn0003435,FBgn0003459,FBgn0003495,FBgn0003866,FBgn0003870,FBgn0003984,FBgn0004028,FBgn0004567,FBgn0004606,FBgn0004618,FBgn0004644,FBgn0004861,FBgn0004956,FBgn0005630,FBgn0005638,FBgn0008651,FBgn0010109,FBgn0010238,FBgn0011591,FBgn0011603,FBgn0011674,FBgn0011758,FBg…
mesoderm development	0.019797	FBgn0000015,FBgn0000180,FBgn0000490,FBgn0003117,FBgn0004606,FBgn0004644,FBgn0008651,FBgn0038341,FBgn0261563,FBgn0263118
genital disc pattern formation	0.0212473	FBgn0000015,FBgn0000490,FBgn0000577,FBgn0004644
genital disc anterior/posterior pattern formation	0.0212473	FBgn0000015,FBgn0000490,FBgn0000577,FBgn0004644
negative regulation of biological process	0.0238401	FBgn0000015,FBgn0000179,FBgn0000233,FBgn0000490,FBgn0000577,FBgn0002633,FBgn0003117,FBgn0003459,FBgn0003866,FBgn0003870,FBgn0003984,FBgn0004567,FBgn0004606,FBgn0004644,FBgn0004858,FBgn0004860,FBgn0004861,FBgn0004956,FBgn0010109,FBgn0010313,FBgn0011591,FBgn0011758,FBgn0015399,FBgn0020307,FBgn0024250,FBgn0026411,FBgn0035625,FBgn0037015,FBgn0050169,FBgn0053207,FBgn0086655,FBgn0259172,FBgn0261648,FBg…
neuron differentiation	0.0298802	FBgn0000577,FBgn0001138,FBgn0001235,FBgn0001987,FBgn0002633,FBgn0003435,FBgn0003495,FBgn0003870,FBgn0004567,FBgn0004606,FBgn0004618,FBgn0004644,FBgn0004861,FBgn0004956,FBgn0005630,FBgn0008651,FBgn0010109,FBgn0010238,FBgn0011758,FBgn0015904,FBgn0020912,FBgn0023001,FBgn0023095,FBgn0028645,FBgn0032629,FBgn0034718,FBgn0038874,FBgn0086655,FBgn0261648,FBgn0263239
posterior head segmentation	0.0350255	FBgn0000233,FBgn0000577,FBgn0003339,FBgn0004644,FBgn0086655
anterior head segmentation	0.0377504	FBgn0000233,FBgn0000577,FBgn0001235,FBgn0004644
anterior head development	0.0377504	FBgn0000233,FBgn0000577,FBgn0001235,FBgn0004644
compound eye development	0.0419201	FBgn0000179,FBgn0000490,FBgn0001235,FBgn0002633,FBgn0003866,FBgn0003870,FBgn0004618,FBgn0004644,FBgn0004956,FBgn0005630,FBgn0011591,FBgn0011758,FBgn0015904,FBgn0015919,FBgn0023001,FBgn0024189,FBgn0026411,FBgn0039283,FBgn0259172,FBgn0261648
anatomical structure formation involved in morphogenesis	0.0459093	FBgn0000015,FBgn0000233,FBgn0000490,FBgn0001235,FBgn0003292,FBgn0003339,FBgn0003459,FBgn0003866,FBgn0003870,FBgn0004028,FBgn0004567,FBgn0004644,FBgn0004861,FBgn0008651,FBgn0011591,FBgn0011758,FBgn0015904,FBgn0015919,FBgn0016660,FBgn0024189,FBgn0024250,FBgn0038341,FBgn0039283,FBgn0039709
formation of organ boundary	0.0465392	FBgn0000015,FBgn0000490,FBgn0001235,FBgn0003339,FBgn0003866,FBgn0011758,FBgn0024250
homophilic cell adhesion	0.0468734	FBgn0010238,FBgn0022800,FBgn0023095,FBgn0024189,FBgn0039709,FBgn0261053
regulation of cell fate specification	0.0468734	FBgn0000015,FBgn0001235,FBgn0003870,FBgn0008651,FBgn0016660,FBgn0261648
anterior/posterior pattern specification, imaginal disc	0.0468762	FBgn0000015,FBgn0000179,FBgn0000490,FBgn0000577,FBgn0004644,FBgn0039709
trunk segmentation	0.0468762	FBgn0000015,FBgn0000577,FBgn0003292,FBgn0003866,FBgn0004644

## Sheet: TATAbox Inr
GO term	Holm-Bonferroni adjusted P-value	Genes (FlyBase ID)
cuticle development	2.08244e-11	FBgn0003162,FBgn0004009,FBgn0004197,FBgn0005626,FBgn0020644,FBgn0025578,FBgn0033658,FBgn0033869,FBgn0033942,FBgn0035511,FBgn0035512,FBgn0035513,FBgn0035735,FBgn0035736,FBgn0035737,FBgn0036110,FBgn0036617,FBgn0036619,FBgn0038487,FBgn0038714,FBgn0038901,FBgn0039434,FBgn0039435,FBgn0039436,FBgn0039437,FBgn0039438,FBgn0039440,FBgn0039441,FBgn0039444,FBgn0039448,FBgn0039805,FBgn0041711,FBgn0051876,FBg…
chitin-based cuticle development	1.09531e-10	FBgn0003162,FBgn0020644,FBgn0025578,FBgn0033658,FBgn0033869,FBgn0033942,FBgn0035511,FBgn0035512,FBgn0035513,FBgn0035735,FBgn0035736,FBgn0035737,FBgn0036110,FBgn0036617,FBgn0036619,FBgn0038487,FBgn0038714,FBgn0039434,FBgn0039435,FBgn0039436,FBgn0039437,FBgn0039438,FBgn0039440,FBgn0039441,FBgn0039444,FBgn0039448,FBgn0039805,FBgn0051876,FBgn0250871,FBgn0260006,FBgn0265998
body morphogenesis	5.39151e-08	FBgn0033658,FBgn0038487,FBgn0039434,FBgn0039435,FBgn0039436,FBgn0039437,FBgn0039438,FBgn0039440,FBgn0039441,FBgn0039444,FBgn0039448
cell fate specification	0.00203293	FBgn0001077,FBgn0001981,FBgn0002543,FBgn0002592,FBgn0002629,FBgn0002632,FBgn0002941,FBgn0003430,FBgn0003448,FBgn0003900,FBgn0004009,FBgn0004110,FBgn0004862,FBgn0010433,FBgn0040487
mesodermal cell fate commitment	0.03931	FBgn0002941,FBgn0003448,FBgn0003900,FBgn0004110,FBgn0004862,FBgn0045759
mesodermal cell differentiation	0.03931	FBgn0002941,FBgn0003448,FBgn0003900,FBgn0004110,FBgn0004862,FBgn0045759
mesoderm morphogenesis	0.0445185	FBgn0002941,FBgn0003430,FBgn0003448,FBgn0003900,FBgn0004009,FBgn0004110,FBgn0004862,FBgn0045759

## Sheet: Motif1-6
GO term	Holm-Bonferroni adjusted P-value	Genes (FlyBase ID)
organic cyclic compound metabolic process	7.16249e-05	FBgn0000018,FBgn0000100,FBgn0000588,FBgn0000662,FBgn0001079,FBgn0001120,FBgn0001222,FBgn0001276,FBgn0002622,FBgn0002716,FBgn0003062,FBgn0003278,FBgn0003330,FBgn0003415,FBgn0003575,FBgn0003865,FBgn0003936,FBgn0004054,FBgn0004183,FBgn0004237,FBgn0004390,FBgn0004587,FBgn0004654,FBgn0004872,FBgn0010173,FBgn0010280,FBgn0010356,FBgn0010395,FBgn0010438,FBgn0010774,FBgn0011291,FBgn0011638,FBgn0011660,FBg…
cellular metabolic process	8.9486e-05	FBgn0000018,FBgn0000055,FBgn0000063,FBgn0000100,FBgn0000588,FBgn0000662,FBgn0000721,FBgn0001079,FBgn0001120,FBgn0001174,FBgn0001222,FBgn0001276,FBgn0001332,FBgn0001989,FBgn0002524,FBgn0002593,FBgn0002622,FBgn0002716,FBgn0003062,FBgn0003178,FBgn0003274,FBgn0003278,FBgn0003330,FBgn0003415,FBgn0003520,FBgn0003575,FBgn0003865,FBgn0003936,FBgn0003941,FBgn0004054,FBgn0004183,FBgn0004237,FBgn0004368,FBg…
primary metabolic process	0.0001175	FBgn0000018,FBgn0000063,FBgn0000100,FBgn0000588,FBgn0000662,FBgn0000721,FBgn0001079,FBgn0001120,FBgn0001222,FBgn0001276,FBgn0002524,FBgn0002593,FBgn0002622,FBgn0002716,FBgn0003062,FBgn0003178,FBgn0003274,FBgn0003278,FBgn0003330,FBgn0003415,FBgn0003520,FBgn0003575,FBgn0003865,FBgn0003936,FBgn0003941,FBgn0004054,FBgn0004183,FBgn0004237,FBgn0004368,FBgn0004390,FBgn0004587,FBgn0004654,FBgn0004872,FBg…
nucleobase-containing compound metabolic process	0.00013298	FBgn0000018,FBgn0000100,FBgn0000588,FBgn0000662,FBgn0001079,FBgn0001120,FBgn0001222,FBgn0001276,FBgn0002622,FBgn0002716,FBgn0003062,FBgn0003278,FBgn0003330,FBgn0003415,FBgn0003575,FBgn0003865,FBgn0003936,FBgn0004054,FBgn0004183,FBgn0004237,FBgn0004390,FBgn0004587,FBgn0004654,FBgn0004872,FBgn0010173,FBgn0010280,FBgn0010356,FBgn0010438,FBgn0010774,FBgn0011291,FBgn0011638,FBgn0011660,FBgn0011836,FBg…
cellular aromatic compound metabolic process	0.000136353	FBgn0000018,FBgn0000100,FBgn0000588,FBgn0000662,FBgn0001079,FBgn0001120,FBgn0001222,FBgn0001276,FBgn0002622,FBgn0002716,FBgn0003062,FBgn0003278,FBgn0003330,FBgn0003415,FBgn0003575,FBgn0003865,FBgn0003936,FBgn0004054,FBgn0004183,FBgn0004237,FBgn0004390,FBgn0004587,FBgn0004654,FBgn0004872,FBgn0010173,FBgn0010280,FBgn0010356,FBgn0010395,FBgn0010438,FBgn0010774,FBgn0011291,FBgn0011638,FBgn0011660,FBg…
organic substance metabolic process	0.000200799	FBgn0000018,FBgn0000055,FBgn0000063,FBgn0000100,FBgn0000588,FBgn0000662,FBgn0000721,FBgn0001079,FBgn0001120,FBgn0001222,FBgn0001276,FBgn0002524,FBgn0002593,FBgn0002622,FBgn0002716,FBgn0003062,FBgn0003178,FBgn0003274,FBgn0003278,FBgn0003330,FBgn0003415,FBgn0003520,FBgn0003575,FBgn0003865,FBgn0003936,FBgn0003941,FBgn0004054,FBgn0004183,FBgn0004237,FBgn0004368,FBgn0004390,FBgn0004587,FBgn0004654,FBg…
metabolic process	0.000790191	FBgn0000018,FBgn0000055,FBgn0000056,FBgn0000063,FBgn0000100,FBgn0000318,FBgn0000588,FBgn0000662,FBgn0000721,FBgn0001079,FBgn0001120,FBgn0001174,FBgn0001222,FBgn0001276,FBgn0001332,FBgn0001989,FBgn0002524,FBgn0002593,FBgn0002622,FBgn0002716,FBgn0003062,FBgn0003178,FBgn0003274,FBgn0003278,FBgn0003330,FBgn0003415,FBgn0003520,FBgn0003575,FBgn0003865,FBgn0003936,FBgn0003941,FBgn0004054,FBgn0004183,FBg…
heterocycle metabolic process	0.000803735	FBgn0000018,FBgn0000100,FBgn0000588,FBgn0000662,FBgn0001079,FBgn0001120,FBgn0001222,FBgn0001276,FBgn0002622,FBgn0002716,FBgn0003062,FBgn0003278,FBgn0003330,FBgn0003415,FBgn0003575,FBgn0003865,FBgn0003936,FBgn0004054,FBgn0004183,FBgn0004237,FBgn0004390,FBgn0004587,FBgn0004654,FBgn0004872,FBgn0010173,FBgn0010280,FBgn0010356,FBgn0010438,FBgn0010774,FBgn0011291,FBgn0011638,FBgn0011660,FBgn0011836,FBg…
cellular process	0.00083345	FBgn0000018,FBgn0000055,FBgn0000063,FBgn0000100,FBgn0000283,FBgn0000317,FBgn0000463,FBgn0000588,FBgn0000662,FBgn0000721,FBgn0001079,FBgn0001120,FBgn0001174,FBgn0001222,FBgn0001276,FBgn0001332,FBgn0001989,FBgn0002524,FBgn0002593,FBgn0002622,FBgn0002716,FBgn0003062,FBgn0003178,FBgn0003274,FBgn0003278,FBgn0003330,FBgn0003415,FBgn0003429,FBgn0003520,FBgn0003575,FBgn0003660,FBgn0003865,FBgn0003936,FBg…
cellular nitrogen compound metabolic process	0.00167831	FBgn0000018,FBgn0000100,FBgn0000588,FBgn0000662,FBgn0001079,FBgn0001120,FBgn0001222,FBgn0001276,FBgn0002622,FBgn0002716,FBgn0003062,FBgn0003278,FBgn0003330,FBgn0003415,FBgn0003575,FBgn0003865,FBgn0003936,FBgn0004054,FBgn0004183,FBgn0004237,FBgn0004390,FBgn0004587,FBgn0004654,FBgn0004872,FBgn0010173,FBgn0010280,FBgn0010356,FBgn0010438,FBgn0010774,FBgn0011291,FBgn0011638,FBgn0011660,FBgn0011836,FBg…
single-organism organelle organization	0.00190139	FBgn0000063,FBgn0000317,FBgn0000463,FBgn0000588,FBgn0001120,FBgn0002622,FBgn0003062,FBgn0003330,FBgn0004237,FBgn0004380,FBgn0004390,FBgn0004587,FBgn0004926,FBgn0010173,FBgn0010314,FBgn0011284,FBgn0013750,FBgn0014011,FBgn0015008,FBgn0015513,FBgn0015546,FBgn0015754,FBgn0015756,FBgn0015805,FBgn0017551,FBgn0019968,FBgn0020440,FBgn0023180,FBgn0024273,FBgn0024291,FBgn0024509,FBgn0025286,FBgn0026427,FBg…
cellular macromolecule metabolic process	0.0019857	FBgn0000018,FBgn0000063,FBgn0000100,FBgn0000588,FBgn0000662,FBgn0000721,FBgn0001079,FBgn0001120,FBgn0001222,FBgn0001276,FBgn0002593,FBgn0002622,FBgn0002716,FBgn0003062,FBgn0003274,FBgn0003278,FBgn0003330,FBgn0003415,FBgn0003520,FBgn0003575,FBgn0003865,FBgn0003936,FBgn0003941,FBgn0004054,FBgn0004183,FBgn0004237,FBgn0004368,FBgn0004390,FBgn0004587,FBgn0004872,FBgn0004926,FBgn0004957,FBgn0010173,FBg…
RNA processing	0.00208163	FBgn0000662,FBgn0003062,FBgn0003936,FBgn0004183,FBgn0004237,FBgn0004587,FBgn0004872,FBgn0010774,FBgn0011638,FBgn0015393,FBgn0015778,FBgn0020305,FBgn0022943,FBgn0024698,FBgn0028402,FBgn0028897,FBgn0029148,FBgn0031266,FBgn0031628,FBgn0032248,FBgn0032388,FBgn0032430,FBgn0033029,FBgn0033556,FBgn0033859,FBgn0034000,FBgn0034598,FBgn0035900,FBgn0036487,FBgn0036850,FBgn0037583,FBgn0038168,FBgn0038471,FBg…
gene expression	0.00230283	FBgn0000018,FBgn0000100,FBgn0000588,FBgn0000662,FBgn0001079,FBgn0001222,FBgn0001276,FBgn0002593,FBgn0002622,FBgn0003062,FBgn0003274,FBgn0003278,FBgn0003330,FBgn0003415,FBgn0003520,FBgn0003575,FBgn0003865,FBgn0003936,FBgn0003941,FBgn0004054,FBgn0004183,FBgn0004237,FBgn0004390,FBgn0004587,FBgn0004872,FBgn0004926,FBgn0010280,FBgn0010356,FBgn0010774,FBgn0011284,FBgn0011291,FBgn0011638,FBgn0011836,FBg…
RNA metabolic process	0.00237205	FBgn0000018,FBgn0000588,FBgn0000662,FBgn0001079,FBgn0001222,FBgn0001276,FBgn0003062,FBgn0003278,FBgn0003330,FBgn0003415,FBgn0003575,FBgn0003865,FBgn0003936,FBgn0004054,FBgn0004183,FBgn0004237,FBgn0004390,FBgn0004587,FBgn0004872,FBgn0010280,FBgn0010356,FBgn0010774,FBgn0011291,FBgn0011638,FBgn0011836,FBgn0015239,FBgn0015371,FBgn0015393,FBgn0015778,FBgn0015805,FBgn0020305,FBgn0020493,FBgn0020496,FBg…
nervous system development	0.00286318	FBgn0000317,FBgn0000463,FBgn0000588,FBgn0001222,FBgn0003278,FBgn0003330,FBgn0003520,FBgn0004049,FBgn0004237,FBgn0004368,FBgn0004380,FBgn0004390,FBgn0004926,FBgn0010173,FBgn0010280,FBgn0010356,FBgn0010395,FBgn0010894,FBgn0011259,FBgn0011836,FBgn0013725,FBgn0014007,FBgn0014011,FBgn0015239,FBgn0015269,FBgn0015371,FBgn0015393,FBgn0015513,FBgn0015754,FBgn0015778,FBgn0015805,FBgn0017551,FBgn0020224,FBg…
nucleic acid metabolic process	0.00457515	FBgn0000018,FBgn0000100,FBgn0000588,FBgn0000662,FBgn0001079,FBgn0001120,FBgn0001222,FBgn0001276,FBgn0002622,FBgn0002716,FBgn0003062,FBgn0003278,FBgn0003330,FBgn0003415,FBgn0003575,FBgn0003865,FBgn0003936,FBgn0004054,FBgn0004183,FBgn0004237,FBgn0004390,FBgn0004587,FBgn0004872,FBgn0010173,FBgn0010280,FBgn0010356,FBgn0010438,FBgn0010774,FBgn0011291,FBgn0011638,FBgn0011660,FBgn0011836,FBgn0015239,FBg…
neurogenesis	0.0110111	FBgn0000317,FBgn0000463,FBgn0000588,FBgn0001222,FBgn0003278,FBgn0003330,FBgn0003520,FBgn0004049,FBgn0004237,FBgn0004368,FBgn0004380,FBgn0004390,FBgn0004926,FBgn0010173,FBgn0010280,FBgn0010356,FBgn0010894,FBgn0011259,FBgn0011836,FBgn0013725,FBgn0014007,FBgn0014011,FBgn0015239,FBgn0015269,FBgn0015371,FBgn0015754,FBgn0015778,FBgn0015805,FBgn0017551,FBgn0020224,FBgn0020493,FBgn0024273,FBgn0024698,FBg…
mRNA metabolic process	0.020119	FBgn0000662,FBgn0003936,FBgn0004183,FBgn0004237,FBgn0004587,FBgn0004872,FBgn0010774,FBgn0015393,FBgn0015778,FBgn0022943,FBgn0024698,FBgn0028402,FBgn0028897,FBgn0031266,FBgn0031628,FBgn0032248,FBgn0032388,FBgn0033029,FBgn0033556,FBgn0033859,FBgn0034000,FBgn0034598,FBgn0035900,FBgn0036487,FBgn0036534,FBgn0036850,FBgn0037583,FBgn0037707,FBgn0038887,FBgn0039210,FBgn0039260,FBgn0039600,FBgn0261789,FBg…
nitrogen compound metabolic process	0.0292028	FBgn0000018,FBgn0000100,FBgn0000588,FBgn0000662,FBgn0001079,FBgn0001120,FBgn0001222,FBgn0001276,FBgn0002524,FBgn0002622,FBgn0002716,FBgn0003062,FBgn0003278,FBgn0003330,FBgn0003415,FBgn0003575,FBgn0003865,FBgn0003936,FBgn0004054,FBgn0004183,FBgn0004237,FBgn0004390,FBgn0004587,FBgn0004654,FBgn0004872,FBgn0010173,FBgn0010280,FBgn0010356,FBgn0010438,FBgn0010774,FBgn0011291,FBgn0011638,FBgn0011660,FBg…
cellular component organization or biogenesis	0.0447206	FBgn0000063,FBgn0000100,FBgn0000283,FBgn0000317,FBgn0000463,FBgn0000588,FBgn0001120,FBgn0002622,FBgn0002716,FBgn0003062,FBgn0003330,FBgn0003520,FBgn0004237,FBgn0004368,FBgn0004380,FBgn0004390,FBgn0004587,FBgn0004872,FBgn0004926,FBgn0010173,FBgn0010280,FBgn0010314,FBgn0010395,FBgn0010438,FBgn0010747,FBgn0010894,FBgn0011259,FBgn0011284,FBgn0011802,FBgn0013750,FBgn0014007,FBgn0014011,FBgn0015008,FBg…

## Sheet: DRE
GO term	Holm-Bonferroni adjusted P-value	Genes (FlyBase ID)
cellular metabolic process	1.35168e-11	FBgn0000114,FBgn0000146,FBgn0000376,FBgn0000504,FBgn0000615,FBgn0000617,FBgn0000996,FBgn0001139,FBgn0001341,FBgn0001974,FBgn0001986,FBgn0002525,FBgn0002579,FBgn0002638,FBgn0002775,FBgn0002791,FBgn0002931,FBgn0003008,FBgn0003093,FBgn0003129,FBgn0003169,FBgn0003261,FBgn0003334,FBgn0003401,FBgn0003676,FBgn0003716,FBgn0003731,FBgn0003742,FBgn0003887,FBgn0004107,FBgn0004698,FBgn0004797,FBgn0004837,FBg…
cellular macromolecule metabolic process	4.78163e-10	FBgn0000114,FBgn0000146,FBgn0000376,FBgn0000504,FBgn0000615,FBgn0000617,FBgn0000996,FBgn0001139,FBgn0001341,FBgn0001974,FBgn0001986,FBgn0002525,FBgn0002579,FBgn0002638,FBgn0002775,FBgn0002791,FBgn0002931,FBgn0003093,FBgn0003129,FBgn0003169,FBgn0003261,FBgn0003334,FBgn0003401,FBgn0003676,FBgn0003716,FBgn0003731,FBgn0003742,FBgn0004107,FBgn0004698,FBgn0004837,FBgn0004867,FBgn0004908,FBgn0004914,FBg…
cellular process	3.12581e-09	FBgn0000114,FBgn0000146,FBgn0000355,FBgn0000376,FBgn0000504,FBgn0000581,FBgn0000615,FBgn0000617,FBgn0000996,FBgn0001139,FBgn0001341,FBgn0001974,FBgn0001977,FBgn0001986,FBgn0002525,FBgn0002579,FBgn0002638,FBgn0002775,FBgn0002781,FBgn0002791,FBgn0002931,FBgn0003008,FBgn0003093,FBgn0003129,FBgn0003169,FBgn0003261,FBgn0003328,FBgn0003334,FBgn0003401,FBgn0003676,FBgn0003716,FBgn0003731,FBgn0003742,FBg…
cellular component organization or biogenesis	2.60483e-08	FBgn0000114,FBgn0000146,FBgn0000355,FBgn0000504,FBgn0000581,FBgn0000615,FBgn0000996,FBgn0001139,FBgn0001977,FBgn0002525,FBgn0002638,FBgn0002781,FBgn0002791,FBgn0003008,FBgn0003093,FBgn0003129,FBgn0003169,FBgn0003328,FBgn0003334,FBgn0003676,FBgn0003716,FBgn0003731,FBgn0003742,FBgn0003887,FBgn0003891,FBgn0004569,FBgn0004649,FBgn0004655,FBgn0004875,FBgn0005655,FBgn0005695,FBgn0010097,FBgn0010300,FBg…
primary metabolic process	1.53053e-07	FBgn0000114,FBgn0000146,FBgn0000376,FBgn0000504,FBgn0000615,FBgn0000617,FBgn0000996,FBgn0001139,FBgn0001341,FBgn0001970,FBgn0001974,FBgn0001986,FBgn0002525,FBgn0002579,FBgn0002638,FBgn0002775,FBgn0002791,FBgn0002931,FBgn0003093,FBgn0003129,FBgn0003169,FBgn0003261,FBgn0003334,FBgn0003401,FBgn0003676,FBgn0003716,FBgn0003731,FBgn0003742,FBgn0003887,FBgn0004107,FBgn0004698,FBgn0004797,FBgn0004837,FBg…
cellular component organization	3.9892e-07	FBgn0000114,FBgn0000146,FBgn0000355,FBgn0000504,FBgn0000581,FBgn0000615,FBgn0000996,FBgn0001139,FBgn0001977,FBgn0002525,FBgn0002638,FBgn0002781,FBgn0002791,FBgn0003008,FBgn0003093,FBgn0003129,FBgn0003169,FBgn0003328,FBgn0003334,FBgn0003676,FBgn0003716,FBgn0003731,FBgn0003742,FBgn0003887,FBgn0003891,FBgn0004569,FBgn0004649,FBgn0004655,FBgn0004875,FBgn0005655,FBgn0005695,FBgn0010097,FBgn0010300,FBg…
cellular nitrogen compound metabolic process	5.72758e-07	FBgn0000114,FBgn0000146,FBgn0000376,FBgn0000504,FBgn0000615,FBgn0000617,FBgn0000996,FBgn0001139,FBgn0001341,FBgn0001974,FBgn0001986,FBgn0002525,FBgn0002638,FBgn0002775,FBgn0002931,FBgn0003129,FBgn0003261,FBgn0003334,FBgn0003401,FBgn0003716,FBgn0003742,FBgn0003887,FBgn0004698,FBgn0004837,FBgn0004901,FBgn0004914,FBgn0004915,FBgn0005558,FBgn0005642,FBgn0005655,FBgn0005694,FBgn0005695,FBgn0010041,FBg…
metabolic process	9.95909e-07	FBgn0000114,FBgn0000146,FBgn0000376,FBgn0000504,FBgn0000615,FBgn0000617,FBgn0000996,FBgn0001139,FBgn0001341,FBgn0001970,FBgn0001974,FBgn0001977,FBgn0001986,FBgn0001992,FBgn0002525,FBgn0002579,FBgn0002638,FBgn0002775,FBgn0002791,FBgn0002931,FBgn0003008,FBgn0003093,FBgn0003129,FBgn0003169,FBgn0003261,FBgn0003334,FBgn0003401,FBgn0003676,FBgn0003716,FBgn0003731,FBgn0003742,FBgn0003887,FBgn0004107,FBg…
regulation of biological process	7.34488e-06	FBgn0000114,FBgn0000146,FBgn0000376,FBgn0000504,FBgn0000615,FBgn0000617,FBgn0001139,FBgn0001977,FBgn0002525,FBgn0002638,FBgn0002775,FBgn0002781,FBgn0002791,FBgn0002931,FBgn0003093,FBgn0003129,FBgn0003169,FBgn0003261,FBgn0003328,FBgn0003334,FBgn0003716,FBgn0003731,FBgn0003742,FBgn0004107,FBgn0004364,FBgn0004569,FBgn0004797,FBgn0004837,FBgn0004875,FBgn0004908,FBgn0004914,FBgn0004915,FBgn0005558,FBg…
regulation of cellular process	8.47309e-06	FBgn0000114,FBgn0000146,FBgn0000376,FBgn0000504,FBgn0000615,FBgn0000617,FBgn0001139,FBgn0001977,FBgn0002525,FBgn0002638,FBgn0002775,FBgn0002781,FBgn0002791,FBgn0002931,FBgn0003093,FBgn0003129,FBgn0003169,FBgn0003261,FBgn0003328,FBgn0003334,FBgn0003716,FBgn0003731,FBgn0003742,FBgn0004107,FBgn0004364,FBgn0004569,FBgn0004797,FBgn0004837,FBgn0004875,FBgn0004908,FBgn0004914,FBgn0004915,FBgn0005558,FBg…
biological regulation	8.8896e-06	FBgn0000114,FBgn0000146,FBgn0000376,FBgn0000504,FBgn0000615,FBgn0000617,FBgn0001139,FBgn0001977,FBgn0002525,FBgn0002638,FBgn0002775,FBgn0002781,FBgn0002791,FBgn0002931,FBgn0003008,FBgn0003093,FBgn0003129,FBgn0003169,FBgn0003261,FBgn0003328,FBgn0003334,FBgn0003716,FBgn0003731,FBgn0003742,FBgn0004107,FBgn0004364,FBgn0004569,FBgn0004797,FBgn0004837,FBgn0004875,FBgn0004908,FBgn0004914,FBgn0004915,FBg…
mitotic cell cycle	1.10566e-05	FBgn0000114,FBgn0000146,FBgn0000996,FBgn0002525,FBgn0002638,FBgn0003676,FBgn0003731,FBgn0004107,FBgn0004837,FBgn0004875,FBgn0005655,FBgn0010411,FBgn0011207,FBgn0011217,FBgn0011739,FBgn0012058,FBgn0013325,FBgn0013756,FBgn0013762,FBgn0013765,FBgn0014189,FBgn0015019,FBgn0015270,FBgn0015618,FBgn0016131,FBgn0020309,FBgn0020407,FBgn0023177,FBgn0025455,FBgn0025457,FBgn0025781,FBgn0026431,FBgn0026479,FBg…
organic substance metabolic process	1.13407e-05	FBgn0000114,FBgn0000146,FBgn0000376,FBgn0000504,FBgn0000615,FBgn0000617,FBgn0000996,FBgn0001139,FBgn0001341,FBgn0001970,FBgn0001974,FBgn0001986,FBgn0002525,FBgn0002579,FBgn0002638,FBgn0002775,FBgn0002791,FBgn0002931,FBgn0003008,FBgn0003093,FBgn0003129,FBgn0003169,FBgn0003261,FBgn0003334,FBgn0003401,FBgn0003676,FBgn0003716,FBgn0003731,FBgn0003742,FBgn0003887,FBgn0004107,FBgn0004698,FBgn0004797,FBg…
single-organism organelle organization	1.20096e-05	FBgn0000114,FBgn0000146,FBgn0000996,FBgn0001139,FBgn0002525,FBgn0002638,FBgn0003676,FBgn0003887,FBgn0003891,FBgn0004655,FBgn0004875,FBgn0005655,FBgn0010097,FBgn0010411,FBgn0010501,FBgn0011207,FBgn0011217,FBgn0011570,FBgn0011771,FBgn0011774,FBgn0011823,FBgn0012058,FBgn0013325,FBgn0013563,FBgn0013717,FBgn0013756,FBgn0013765,FBgn0014189,FBgn0014861,FBgn0015019,FBgn0015270,FBgn0015926,FBgn0016984,FBg…
cell cycle	2.16488e-05	FBgn0000114,FBgn0000146,FBgn0000996,FBgn0002525,FBgn0002638,FBgn0002781,FBgn0002791,FBgn0003676,FBgn0003731,FBgn0003887,FBgn0004107,FBgn0004655,FBgn0004837,FBgn0004875,FBgn0005655,FBgn0010097,FBgn0010300,FBgn0010411,FBgn0011207,FBgn0011217,FBgn0011739,FBgn0011823,FBgn0012058,FBgn0013325,FBgn0013756,FBgn0013762,FBgn0013765,FBgn0014133,FBgn0014189,FBgn0014861,FBgn0015019,FBgn0015270,FBgn0015618,FBg…
cellular localization	3.74446e-05	FBgn0000146,FBgn0000615,FBgn0002525,FBgn0002638,FBgn0003008,FBgn0003891,FBgn0004875,FBgn0004908,FBgn0010097,FBgn0010300,FBgn0010379,FBgn0010501,FBgn0010638,FBgn0010660,FBgn0011016,FBgn0011570,FBgn0011823,FBgn0013563,FBgn0013756,FBgn0013762,FBgn0014189,FBgn0014877,FBgn0015247,FBgn0016984,FBgn0020407,FBgn0020626,FBgn0021761,FBgn0021796,FBgn0022213,FBgn0023000,FBgn0023542,FBgn0024234,FBgn0025700,FBg…
heterocycle metabolic process	4.18488e-05	FBgn0000114,FBgn0000146,FBgn0000376,FBgn0000504,FBgn0000615,FBgn0000617,FBgn0000996,FBgn0001139,FBgn0001341,FBgn0001974,FBgn0001986,FBgn0002525,FBgn0002638,FBgn0002775,FBgn0002931,FBgn0003008,FBgn0003129,FBgn0003261,FBgn0003334,FBgn0003401,FBgn0003716,FBgn0003742,FBgn0003887,FBgn0004698,FBgn0004837,FBgn0004901,FBgn0004914,FBgn0004915,FBgn0005558,FBgn0005642,FBgn0005655,FBgn0005694,FBgn0005695,FBg…
macromolecule metabolic process	5.26462e-05	FBgn0000114,FBgn0000146,FBgn0000376,FBgn0000504,FBgn0000615,FBgn0000617,FBgn0000996,FBgn0001139,FBgn0001341,FBgn0001974,FBgn0001986,FBgn0002525,FBgn0002579,FBgn0002638,FBgn0002775,FBgn0002791,FBgn0002931,FBgn0003093,FBgn0003129,FBgn0003169,FBgn0003261,FBgn0003334,FBgn0003401,FBgn0003676,FBgn0003716,FBgn0003731,FBgn0003742,FBgn0004107,FBgn0004698,FBgn0004837,FBgn0004867,FBgn0004908,FBgn0004914,FBg…
nitrogen compound metabolic process	6.34453e-05	FBgn0000114,FBgn0000146,FBgn0000376,FBgn0000504,FBgn0000615,FBgn0000617,FBgn0000996,FBgn0001139,FBgn0001341,FBgn0001974,FBgn0001986,FBgn0002525,FBgn0002638,FBgn0002775,FBgn0002931,FBgn0003129,FBgn0003261,FBgn0003334,FBgn0003401,FBgn0003716,FBgn0003742,FBgn0003887,FBgn0004698,FBgn0004837,FBgn0004901,FBgn0004914,FBgn0004915,FBgn0005558,FBgn0005642,FBgn0005655,FBgn0005694,FBgn0005695,FBgn0010041,FBg…
nucleic acid metabolic process	8.16753e-05	FBgn0000114,FBgn0000146,FBgn0000376,FBgn0000504,FBgn0000615,FBgn0000617,FBgn0000996,FBgn0001139,FBgn0001341,FBgn0001974,FBgn0001986,FBgn0002525,FBgn0002638,FBgn0002775,FBgn0002931,FBgn0003129,FBgn0003261,FBgn0003334,FBgn0003401,FBgn0003716,FBgn0003742,FBgn0004698,FBgn0004837,FBgn0004914,FBgn0004915,FBgn0005558,FBgn0005642,FBgn0005655,FBgn0005694,FBgn0005695,FBgn0010300,FBgn0010520,FBgn0011289,FBg…
nucleobase-containing compound metabolic process	8.4647e-05	FBgn0000114,FBgn0000146,FBgn0000376,FBgn0000504,FBgn0000615,FBgn0000617,FBgn0000996,FBgn0001139,FBgn0001341,FBgn0001974,FBgn0001986,FBgn0002525,FBgn0002638,FBgn0002775,FBgn0002931,FBgn0003129,FBgn0003261,FBgn0003334,FBgn0003401,FBgn0003716,FBgn0003742,FBgn0003887,FBgn0004698,FBgn0004837,FBgn0004901,FBgn0004914,FBgn0004915,FBgn0005558,FBgn0005642,FBgn0005655,FBgn0005694,FBgn0005695,FBgn0010097,FBg…
RNA processing	0.000109305	FBgn0000114,FBgn0000146,FBgn0000504,FBgn0000615,FBgn0001974,FBgn0001986,FBgn0003261,FBgn0003742,FBgn0012058,FBgn0014189,FBgn0015520,FBgn0015618,FBgn0015621,FBgn0015907,FBgn0016070,FBgn0020407,FBgn0020766,FBgn0024285,FBgn0025571,FBgn0026086,FBgn0027873,FBgn0028426,FBgn0030063,FBgn0030625,FBgn0030631,FBgn0031456,FBgn0031493,FBgn0031631,FBgn0032822,FBgn0033741,FBgn0034002,FBgn0034735,FBgn0034879,FBg…
cellular protein metabolic process	0.000132386	FBgn0000114,FBgn0000146,FBgn0002579,FBgn0002791,FBgn0003093,FBgn0003169,FBgn0003401,FBgn0003676,FBgn0003716,FBgn0003731,FBgn0004107,FBgn0004837,FBgn0004867,FBgn0004908,FBgn0005585,FBgn0010300,FBgn0010379,FBgn0010411,FBgn0011207,FBgn0011217,FBgn0011336,FBgn0011739,FBgn0011740,FBgn0011754,FBgn0011872,FBgn0011881,FBgn0011882,FBgn0012011,FBgn0012058,FBgn0013325,FBgn0013717,FBgn0013762,FBgn0014877,FBg…
RNA metabolic process	0.000238757	FBgn0000114,FBgn0000146,FBgn0000376,FBgn0000504,FBgn0000615,FBgn0000617,FBgn0001139,FBgn0001341,FBgn0001974,FBgn0001986,FBgn0002525,FBgn0002775,FBgn0002931,FBgn0003129,FBgn0003261,FBgn0003334,FBgn0003401,FBgn0003716,FBgn0003742,FBgn0004837,FBgn0004914,FBgn0004915,FBgn0005558,FBgn0005642,FBgn0005694,FBgn0005695,FBgn0010300,FBgn0010520,FBgn0011289,FBgn0011739,FBgn0012058,FBgn0013717,FBgn0013753,FBg…
cellular aromatic compound metabolic process	0.000258751	FBgn0000114,FBgn0000146,FBgn0000376,FBgn0000504,FBgn0000615,FBgn0000617,FBgn0000996,FBgn0001139,FBgn0001341,FBgn0001974,FBgn0001986,FBgn0002525,FBgn0002638,FBgn0002775,FBgn0002931,FBgn0003008,FBgn0003129,FBgn0003261,FBgn0003334,FBgn0003401,FBgn0003716,FBgn0003742,FBgn0003887,FBgn0004698,FBgn0004837,FBgn0004901,FBgn0004914,FBgn0004915,FBgn0005558,FBgn0005642,FBgn0005655,FBgn0005694,FBgn0005695,FBg…
organic cyclic compound metabolic process	0.000266378	FBgn0000114,FBgn0000146,FBgn0000376,FBgn0000504,FBgn0000615,FBgn0000617,FBgn0000996,FBgn0001139,FBgn0001341,FBgn0001974,FBgn0001986,FBgn0002525,FBgn0002638,FBgn0002775,FBgn0002931,FBgn0003008,FBgn0003129,FBgn0003261,FBgn0003334,FBgn0003401,FBgn0003716,FBgn0003742,FBgn0003887,FBgn0004698,FBgn0004837,FBgn0004901,FBgn0004914,FBgn0004915,FBgn0005558,FBgn0005642,FBgn0005655,FBgn0005694,FBgn0005695,FBg…
organelle organization	0.000348491	FBgn0000114,FBgn0000146,FBgn0000581,FBgn0000996,FBgn0001139,FBgn0002525,FBgn0002638,FBgn0002781,FBgn0003008,FBgn0003093,FBgn0003676,FBgn0003887,FBgn0003891,FBgn0004655,FBgn0004875,FBgn0005655,FBgn0010097,FBgn0010411,FBgn0010501,FBgn0010520,FBgn0011207,FBgn0011217,FBgn0011570,FBgn0011771,FBgn0011774,FBgn0011823,FBgn0012058,FBgn0013325,FBgn0013563,FBgn0013717,FBgn0013756,FBgn0013765,FBgn0014189,FBg…
mRNA metabolic process	0.000391524	FBgn0000114,FBgn0000146,FBgn0000504,FBgn0000615,FBgn0001974,FBgn0001986,FBgn0003261,FBgn0003742,FBgn0012058,FBgn0014189,FBgn0015520,FBgn0015621,FBgn0015907,FBgn0016070,FBgn0019890,FBgn0024285,FBgn0025571,FBgn0026086,FBgn0027873,FBgn0030354,FBgn0030625,FBgn0030631,FBgn0031456,FBgn0031493,FBgn0031631,FBgn0032296,FBgn0032822,FBgn0034002,FBgn0034879,FBgn0035162,FBgn0036277,FBgn0036450,FBgn0036734,FBg…
cellular protein modification process	0.000432969	FBgn0003093,FBgn0003169,FBgn0003401,FBgn0003716,FBgn0003731,FBgn0004107,FBgn0004837,FBgn0004908,FBgn0010379,FBgn0011217,FBgn0011336,FBgn0011739,FBgn0011740,FBgn0011754,FBgn0013717,FBgn0013762,FBgn0015247,FBgn0015295,FBgn0015618,FBgn0016131,FBgn0017418,FBgn0021796,FBgn0023177,FBgn0024734,FBgn0025455,FBgn0025638,FBgn0025639,FBgn0027052,FBgn0027053,FBgn0028429,FBgn0028926,FBgn0029157,FBgn0030327,FBg…
protein modification process	0.000432969	FBgn0003093,FBgn0003169,FBgn0003401,FBgn0003716,FBgn0003731,FBgn0004107,FBgn0004837,FBgn0004908,FBgn0010379,FBgn0011217,FBgn0011336,FBgn0011739,FBgn0011740,FBgn0011754,FBgn0013717,FBgn0013762,FBgn0015247,FBgn0015295,FBgn0015618,FBgn0016131,FBgn0017418,FBgn0021796,FBgn0023177,FBgn0024734,FBgn0025455,FBgn0025638,FBgn0025639,FBgn0027052,FBgn0027053,FBgn0028429,FBgn0028926,FBgn0029157,FBgn0030327,FBg…
establishment of localization in cell	0.000585582	FBgn0002525,FBgn0002638,FBgn0003008,FBgn0003891,FBgn0004908,FBgn0010300,FBgn0010379,FBgn0010501,FBgn0010638,FBgn0010660,FBgn0011570,FBgn0011823,FBgn0013563,FBgn0013756,FBgn0013762,FBgn0014189,FBgn0014877,FBgn0015247,FBgn0020626,FBgn0021761,FBgn0021796,FBgn0022213,FBgn0023000,FBgn0023542,FBgn0024234,FBgn0025700,FBgn0025725,FBgn0026378,FBgn0026479,FBgn0027338,FBgn0027569,FBgn0027655,FBgn0028400,FBg…
macromolecule modification	0.00076303	FBgn0003093,FBgn0003169,FBgn0003401,FBgn0003716,FBgn0003731,FBgn0004107,FBgn0004837,FBgn0004908,FBgn0010379,FBgn0011217,FBgn0011336,FBgn0011739,FBgn0011740,FBgn0011754,FBgn0013717,FBgn0013762,FBgn0015247,FBgn0015295,FBgn0015618,FBgn0016131,FBgn0017418,FBgn0021796,FBgn0023177,FBgn0024734,FBgn0025455,FBgn0025638,FBgn0025639,FBgn0026086,FBgn0027052,FBgn0027053,FBgn0028429,FBgn0028926,FBgn0029157,FBg…
neurogenesis	0.00899232	FBgn0000504,FBgn0000581,FBgn0000996,FBgn0001139,FBgn0001986,FBgn0002638,FBgn0003093,FBgn0003129,FBgn0003169,FBgn0003261,FBgn0003328,FBgn0003334,FBgn0003731,FBgn0004569,FBgn0004888,FBgn0004908,FBgn0005558,FBgn0005585,FBgn0005655,FBgn0010300,FBgn0010379,FBgn0010501,FBgn0010520,FBgn0010638,FBgn0011217,FBgn0011739,FBgn0011771,FBgn0012058,FBgn0013563,FBgn0013717,FBgn0013762,FBgn0013765,FBgn0014018,FBg…
cell differentiation	0.0131972	FBgn0000114,FBgn0000146,FBgn0000355,FBgn0000504,FBgn0000581,FBgn0000615,FBgn0000996,FBgn0001139,FBgn0001977,FBgn0001986,FBgn0002525,FBgn0002638,FBgn0003093,FBgn0003129,FBgn0003169,FBgn0003261,FBgn0003328,FBgn0003334,FBgn0003716,FBgn0003731,FBgn0003891,FBgn0004569,FBgn0004837,FBgn0004875,FBgn0004888,FBgn0004908,FBgn0005558,FBgn0005585,FBgn0005655,FBgn0005695,FBgn0010097,FBgn0010300,FBgn0010379,FBg…
cell cycle process	0.0132254	FBgn0000114,FBgn0000146,FBgn0000996,FBgn0002525,FBgn0002638,FBgn0002781,FBgn0002791,FBgn0003676,FBgn0003731,FBgn0003887,FBgn0004107,FBgn0004655,FBgn0004837,FBgn0004875,FBgn0005655,FBgn0010097,FBgn0010411,FBgn0011207,FBgn0011217,FBgn0011739,FBgn0011823,FBgn0012058,FBgn0013325,FBgn0013756,FBgn0013765,FBgn0014133,FBgn0014189,FBgn0014861,FBgn0015019,FBgn0015270,FBgn0015618,FBgn0015926,FBgn0016036,FBg…
regulation of metabolic process	0.0254502	FBgn0000114,FBgn0000146,FBgn0000376,FBgn0000504,FBgn0000617,FBgn0001139,FBgn0002525,FBgn0002775,FBgn0002931,FBgn0003129,FBgn0003169,FBgn0003261,FBgn0003334,FBgn0003716,FBgn0003742,FBgn0004837,FBgn0004914,FBgn0004915,FBgn0005558,FBgn0005642,FBgn0005655,FBgn0005694,FBgn0005695,FBgn0010300,FBgn0010501,FBgn0010520,FBgn0010638,FBgn0011217,FBgn0011289,FBgn0011739,FBgn0013717,FBgn0013753,FBgn0013983,FBg…
mRNA processing	0.0289202	FBgn0000114,FBgn0000146,FBgn0000504,FBgn0000615,FBgn0001974,FBgn0001986,FBgn0003261,FBgn0003742,FBgn0012058,FBgn0014189,FBgn0015520,FBgn0015621,FBgn0015907,FBgn0016070,FBgn0024285,FBgn0025571,FBgn0027873,FBgn0030625,FBgn0030631,FBgn0031456,FBgn0031493,FBgn0031631,FBgn0032822,FBgn0034002,FBgn0034879,FBgn0035162,FBgn0036277,FBgn0036450,FBgn0036734,FBgn0037550,FBgn0037573,FBgn0037815,FBgn0038704,FBg…
regulation of cellular metabolic process	0.0325969	FBgn0000114,FBgn0000146,FBgn0000376,FBgn0000504,FBgn0000617,FBgn0001139,FBgn0002525,FBgn0002775,FBgn0002931,FBgn0003129,FBgn0003261,FBgn0003334,FBgn0003716,FBgn0003742,FBgn0004837,FBgn0004914,FBgn0004915,FBgn0005558,FBgn0005642,FBgn0005655,FBgn0005694,FBgn0005695,FBgn0010300,FBgn0010501,FBgn0010520,FBgn0010638,FBgn0011289,FBgn0011739,FBgn0013717,FBgn0013753,FBgn0013983,FBgn0014018,FBgn0014189,FBg…
cellular developmental process	0.033275	FBgn0000114,FBgn0000146,FBgn0000355,FBgn0000504,FBgn0000581,FBgn0000615,FBgn0000996,FBgn0001139,FBgn0001977,FBgn0001986,FBgn0002525,FBgn0002638,FBgn0003093,FBgn0003129,FBgn0003169,FBgn0003261,FBgn0003328,FBgn0003334,FBgn0003716,FBgn0003731,FBgn0003891,FBgn0004569,FBgn0004837,FBgn0004875,FBgn0004888,FBgn0004908,FBgn0005558,FBgn0005585,FBgn0005655,FBgn0005695,FBgn0010097,FBgn0010300,FBgn0010379,FBg…
protein modification by small protein conjugation or removal	0.048803	FBgn0011217,FBgn0013717,FBgn0015247,FBgn0017418,FBgn0025638,FBgn0027052,FBgn0027053,FBgn0031107,FBgn0032725,FBgn0032812,FBgn0033260,FBgn0035402,FBgn0035713,FBgn0035853,FBgn0037384,FBgn0038488,FBgn0260635,FBgn0261268,FBgn0261823,FBgn0263601
