# Supplementary material for: Dynamic Epigenetic Control of Highly Conserved Noncoding Elements
Source: PLoS One. 2014 Oct 7;9(10):e109326. doi: 10.1371/journal.pone.0109326 (PMC4188601; doi:10.1371/journal.pone.0109326)
Supplement: Table S4 — Table listing the protein domains found to be enriched among the HCNE-proximal genes. (XLSX) [file pone.0109326.s007.xlsx]

## Sheet: Inr DPE 
Protein domain	Holm-Bonferroni adjusted P-value	Genes (FlyBase ID)
Immunoglobulin-like domain	1.93218e-11	FBgn0000547,FBgn0000633,FBgn0000636,FBgn0003285,FBgn0010473,FBgn0017590,FBgn0028370,FBgn0028482,FBgn0028644,FBgn0031725,FBgn0034788,FBgn0035170,FBgn0037993,FBgn0038282,FBgn0040726,FBgn0051361,FBgn0051646,FBgn0051708,FBgn0051774,FBgn0052311,FBgn0085400,FBgn0086604,FBgn0250908,FBgn0263219,FBgn0263416
Immunoglobulin subtype 2	1.44267e-10	FBgn0000547,FBgn0000633,FBgn0003285,FBgn0010473,FBgn0017590,FBgn0028370,FBgn0028482,FBgn0031725,FBgn0035170,FBgn0037993,FBgn0038282,FBgn0040726,FBgn0051361,FBgn0051646,FBgn0051708,FBgn0051774,FBgn0052311,FBgn0085400,FBgn0086604,FBgn0263219,FBgn0263416
Immunoglobulin subtype	3.436e-10	FBgn0000547,FBgn0000633,FBgn0003285,FBgn0010473,FBgn0017590,FBgn0028482,FBgn0031725,FBgn0035170,FBgn0037993,FBgn0038282,FBgn0040726,FBgn0051361,FBgn0051646,FBgn0051708,FBgn0051774,FBgn0052311,FBgn0085400,FBgn0086604,FBgn0250908,FBgn0263219,FBgn0263416
Immunoglobulin-like fold	1.30318e-08	FBgn0000547,FBgn0000633,FBgn0000636,FBgn0003285,FBgn0010473,FBgn0017590,FBgn0028370,FBgn0028482,FBgn0028644,FBgn0031725,FBgn0034788,FBgn0035170,FBgn0037993,FBgn0038282,FBgn0040726,FBgn0051361,FBgn0051646,FBgn0051708,FBgn0051774,FBgn0052311,FBgn0085400,FBgn0086604,FBgn0250908,FBgn0263219,FBgn0263416
CD80-like, immunoglobulin C2-set	3.38914e-06	FBgn0000547,FBgn0000636,FBgn0003285,FBgn0028644,FBgn0051774,FBgn0085400,FBgn0086604,FBgn0250908,FBgn0263416
Immunoglobulin I-set	1.67626e-05	FBgn0000547,FBgn0000633,FBgn0003285,FBgn0010473,FBgn0017590,FBgn0028370,FBgn0028482,FBgn0031725,FBgn0040726,FBgn0051646,FBgn0051708,FBgn0051774,FBgn0052311,FBgn0263219,FBgn0263416
Immunoglobulin V-set domain	0.00101834	FBgn0010473,FBgn0028482,FBgn0035170,FBgn0037993,FBgn0038282,FBgn0040726,FBgn0051361,FBgn0085400,FBgn0086604
Leucine-rich repeat, typical subtype	0.00250274	FBgn0003255,FBgn0005775,FBgn0010452,FBgn0028370,FBgn0029114,FBgn0034476,FBgn0034602,FBgn0085397,FBgn0261269,FBgn0261509,FBgn0262473

## Sheet: Inr only
Protein domain	Holm-Bonferroni adjusted P-value	Genes (FlyBase ID)
Homeodomain-like	2.99797e-11	FBgn0000015,FBgn0000577,FBgn0001148,FBgn0001235,FBgn0003339,FBgn0004606,FBgn0008646,FBgn0008651,FBgn0011758,FBgn0015524,FBgn0015904,FBgn0015919,FBgn0020307,FBgn0020912,FBgn0026411,FBgn0035153,FBgn0035158,FBgn0037698,FBgn0039283,FBgn0261930,FBgn0263511
Homeobox domain	8.61267e-10	FBgn0000015,FBgn0000577,FBgn0001148,FBgn0001235,FBgn0003339,FBgn0004606,FBgn0008646,FBgn0008651,FBgn0011758,FBgn0015524,FBgn0015904,FBgn0015919,FBgn0020307,FBgn0020912,FBgn0026411,FBgn0261930,FBgn0263511
Homeobox, conserved site	3.57615e-08	FBgn0000015,FBgn0000577,FBgn0001148,FBgn0003339,FBgn0004606,FBgn0008646,FBgn0008651,FBgn0011758,FBgn0015524,FBgn0015904,FBgn0015919,FBgn0020912,FBgn0026411,FBgn0261930,FBgn0263511
Zinc finger, C2H2	2.17546e-06	FBgn0000233,FBgn0000459,FBgn0003866,FBgn0003870,FBgn0004606,FBgn0004618,FBgn0004858,FBgn0004892,FBgn0005630,FBgn0020378,FBgn0032707,FBgn0035625,FBgn0035903,FBgn0037698,FBgn0039078,FBgn0039808,FBgn0086655,FBgn0259172,FBgn0261648,FBgn0261705,FBgn0263072,FBgn0263239
Zinc finger C2H2-type/integrase DNA-binding domain	3.67242e-06	FBgn0000233,FBgn0003870,FBgn0004606,FBgn0004618,FBgn0004858,FBgn0004892,FBgn0005630,FBgn0020378,FBgn0032707,FBgn0035625,FBgn0037698,FBgn0039078,FBgn0039808,FBgn0086655,FBgn0259172,FBgn0261648,FBgn0261705,FBgn0263072,FBgn0263239
Zinc finger, C2H2-like	1.45702e-05	FBgn0000233,FBgn0000459,FBgn0003866,FBgn0003870,FBgn0004606,FBgn0004618,FBgn0004858,FBgn0004892,FBgn0005630,FBgn0020378,FBgn0032707,FBgn0035625,FBgn0035903,FBgn0037698,FBgn0039078,FBgn0039808,FBgn0086655,FBgn0259172,FBgn0261648,FBgn0261705,FBgn0263072,FBgn0263239
Immunoglobulin-like domain	0.00397727	FBgn0003137,FBgn0003984,FBgn0010238,FBgn0015399,FBgn0024189,FBgn0028645,FBgn0032629,FBgn0034920,FBgn0038156,FBgn0039584,FBgn0053179,FBgn0053512
Immunoglobulin-like fold	0.0123851	FBgn0003137,FBgn0003984,FBgn0010238,FBgn0015399,FBgn0024189,FBgn0028645,FBgn0032629,FBgn0034920,FBgn0038156,FBgn0039584,FBgn0051004,FBgn0053179,FBgn0053512

## Sheet: TATAbox Inr
Protein domain	Holm-Bonferroni adjusted P-value	Genes (FlyBase ID)
Domain of unknown function DUF243	9.23898e-07	FBgn0033658,FBgn0038487,FBgn0039434,FBgn0039435,FBgn0039436,FBgn0039437,FBgn0039438,FBgn0039440,FBgn0039441,FBgn0039444,FBgn0039448
Protein of unknown function DUF1676	6.63738e-05	FBgn0027527,FBgn0037414,FBgn0037416,FBgn0037417,FBgn0037419,FBgn0037424,FBgn0037428,FBgn0037429,FBgn0037430
Insect cuticle protein	0.000338119	FBgn0020644,FBgn0025578,FBgn0033869,FBgn0033942,FBgn0035511,FBgn0035512,FBgn0035513,FBgn0035735,FBgn0035736,FBgn0035737,FBgn0036110,FBgn0036617,FBgn0036619,FBgn0038405,FBgn0038714,FBgn0039805,FBgn0051876
GYR motif	0.0232019	FBgn0034201,FBgn0035551,FBgn0035582,FBgn0037204,FBgn0052237

## Sheet: Motif1-6
Protein domain	Holm-Bonferroni adjusted P-value	Genes (FlyBase ID)
NO ENRICHMENT

## Sheet: DRE
Protein domain	Holm-Bonferroni adjusted P-value	Genes (FlyBase ID)
NO ENRICHMENT
