# Supplementary material for: Dynamic Epigenetic Control of Highly Conserved Noncoding Elements
Source: PLoS One. 2014 Oct 7;9(10):e109326. doi: 10.1371/journal.pone.0109326 (PMC4188601; doi:10.1371/journal.pone.0109326)
Supplement: Table S5 — Table listing P-values associated with Figure 3A–B. P-values obtained by comparing the stage and tissue specificity distributions between genes of different core promoter types. (XLSX) [file pone.0109326.s008.xlsx]

## Sheet: Sheet1
Core pomoter types	Inr/DPE	Inr	TATAbox/Inr	Motif6/Motif1	DRE	Unknown
Inr/DPE		0.0476005	8.89474e-14	1.72542e-14	2.96537e-18	2.64752e-13
Inr	0.237155		1.31493e-06	5.33009e-16	4.11968e-20	9.96855e-06
TATAbox/Inr	1.64714e-18	9.57754e-12		1.33678e-36	7.73152e-48	0.44463
Motif6/Motif1	1.97958e-19	1.47047e-17	1.20997e-47		0.40526	1.22554e-45
DRE	1.00891e-30	8.58692e-27	5.06073e-69	0.569011		2.00229e-62
Unknown	1.00208e-13	1.0668e-07	0.456156	6.21125e-51	1.89237e-80
Mann-Whiteny pvalues for all against all comparison
Red cells contain pvalues for stage spicificity
Blue cells contain values for tissue spicificity
