# Supplementary material for: Dynamic Epigenetic Control of Highly Conserved Noncoding Elements
Source: PLoS One. 2014 Oct 7;9(10):e109326. doi: 10.1371/journal.pone.0109326 (PMC4188601; doi:10.1371/journal.pone.0109326)
Supplement: Table S6 — Table contains the values of the analyzed features used in the clustering analysis (Figure 6). (XLSX) [file pone.0109326.s009.xlsx]

## Sheet: feature_table
HCE ID	Nucleosome	Mono Nucleosome	H3.3	H3.3dN	GC	H3K27ac	H3K9me3	H3K27me3	H3K9ac	H3K4me1	H3K4me3	CBP	Replication Time S2 Log2(Early/Late)	Replication Time Kc Log2(Early/Late)2	Replication Time Bg3 Log2(Early/Late)	LAD
chr3L-7573918	0.235049	0.323608	-0.306527	-0.281552	0.403941	0	0	0	0	0	0	0	0	0	0	0.926606
chr2R-13254836	-0.308844	1.15747	0.354881	0.520544	0.278912	0	0	0	0	0	0	0	-0.109903	0.270518	-0.532651	0.850178
chr2L-15470108	-0.655285	-1.12379	-1.08742	-1.29551	0.451613	0	8	11	0	0	0	0	-0.204162	-0.843181	-0.915091	0.984496
chr3R-19258153	-1.00274	3.05623	-3.23616	-2.89521	0.468354	0	0	5	0	0	0	0	0	0	0	0.893345
chr3L-23240099	0.0339333	0.864162	0.011225	0.566375	0.365	0	9	0	0	0	0	0	-0.427512	-0.122311	-0.279977	0
chr3R-24076101	-1.10881	-0.215716	-0.025141	-0.61777	0.483568	0	0	0	0	0	0	0	0	0	0	0.896197
chr3R-19322496	-0.495633	0.081708	-0.183213	-1.25251	0.447964	0	0	5	0	0	0	0	0	0	0	0.893345
chr2L-14423479	0.058333	1.50908	-0.863086	-0.61811	0.45933	0	6	11	2	0	0	0	0	0	0	0.897567
chr3L-5602451	0.574366	0.170211	0.12777	0.165047	0.403756	0	0	0	0	0	0	0	0.507015	0.240077	-0.098934	0
chr2R-12437876	-0.0347553	0.22013	1.86297	-0.291078	0.353448	0	0	0	0	1	0	0	0	0	0	0
chr2R-16388169	-0.236757	0.191323	-0.014661	0.336448	0.434389	0	0	1	0	0	0	0	0	0	0	0.828125
chr3R-6275299	0.58537	-1.62961	-0.92133	-0.163202	0.502463	1	2	7	1	0	0	0	0	0	0	0
chr3R-19253611	0.215519	-0.0687685	-0.812301	-1.31851	0.384058	0	0	5	0	0	0	0	0	0	0	0.893345
chr3L-10744293	0.127722	-0.646768	0.277205	0.272948	0.353712	2	0	0	0	1	0	0	1.55158	1.74107	1.68252	0.766571
chr2L-528934	-0.540825	0.535934	-1.0133	-0.844709	0.349515	0	4	11	0	1	0	0	0.551249	-0.30553	0.512504	0
chrX-17229406	-0.135759	0.069105	-0.514975	-0.210686	0.470588	1	9	7	0	1	0	0	-0.004146	-0.507731	-0.005897	0.889632
chr3L-15868033	-0.0360497	-1.12837	-0.901731	-1.45916	0.475962	0	0	0	0	0	0	0	0	0	0	0.79402
chr3R-9319127	-0.262471	0.307622	-0.703073	0.149878	0.478049	0	0	0	0	0	0	0	-0.162768	-0.160311	-0.369933	0
chr3R-11255501	-0.0276893	-0.411205	0.412636	0.237386	0.390909	1	0	0	1	1	0	0	0	0	0	0
chr3R-15135984	-0.687599	-1.79008	2.1463	1.53352	0.422908	3	0	0	0	3	0	1	0	0	0	0.859425
chrX-1024947	-0.0209083	0.472772	0.233081	0.328294	0.407583	0	0	0	0	0	0	0	0	0	0	0.972043
chr3L-10114552	-0.174908	0.0080045	0.451353	0.711491	0.399083	0	0	1	0	0	0	0	0	0	0	0.895765
chr2L-13702442	0.0937383	0.0949025	-1.02925	-0.4375	0.470874	0	2	6	0	0	0	0	-0.678416	-0.277081	-0.953333	0.894519
chr3L-21804725	0.339951	-0.369317	0.56561	0.738317	0.492683	1	9	9	2	0	1	0	-0.314019	-0.376459	-0.140422	0.828154
chr3R-23666503	-0.479926	-0.0081665	-0.673289	-1.17324	0.373333	0	0	0	0	0	0	0	-0.889783	-0.655835	-0.870046	0.870259
chr3R-15178996	-0.383242	0.7277	-0.026425	0.1403	0.43	1	0	0	3	2	0	0	-0.633186	-0.770429	-0.376894	0.859425
chr3R-27383353	-0.685693	-0.198388	-0.370514	0.047056	0.462617	0	0	1	0	0	0	0	0	0	0	0.991098
chr3R-1930610	0.571801	-0.150445	0.932034	0.604322	0.38983	0	0	0	0	1	0	0	0	0	0	0.877483
chr3R-13434780	-0.524539	-0.198802	-0.479983	-0.80701	0.472028	0	2	4	0	0	0	0	0	0	0	0
chr3R-26685724	0.141883	-0.368634	0.032227	0.257045	0.510121	1	8	8	0	2	0	0	0.45903	0.884482	0.459062	0.903574
chr3L-6718575	0.180939	0.834944	0.262387	0.421464	0.36036	0	0	0	0	0	0	0	0.517838	-0.191112	-0.296151	0
chr2L-18435542	1.14619	-0.767649	0.246119	0.441866	0.522388	0	0	0	0	0	0	0	0	0	0	0
chr3L-20679825	-0.447032	-1.12182	-0.668524	-1.25293	0.519048	1	9	9	2	2	0	0	0	0	0	0.889051
chr3R-22419329	-0.637278	0.115593	-0.088094	-0.022176	0.363309	0	0	0	0	0	0	0	-1.17735	-0.899378	-0.911505	0.872774
chr2L-4621572	-1.22671	-0.975104	0.168272	1.15569	0.470046	0	0	2	0	0	0	0	-0.564107	-0.995525	-0.761999	0.90642
chr2L-4614910	-0.0625753	-0.423385	0.428445	0.663397	0.454545	0	0	2	0	0	0	1	-0.547196	-0.990647	-0.777029	0.90642
chr3L-3965629	0.36939	-1.37651	0.290681	-0.643662	0.488263	0	0	2	0	0	0	0	-0.131399	-0.288806	-0.391479	0
chrX-8723663	0.074535	0.598942	1.30491	0.742442	0.465116	1	5	7	0	3	0	0	0.619136	0.039038	0.923476	0
chr3R-18685297	-0.846221	3.38538	-2.10803	-2.14321	0.386831	0	0	2	0	0	0	0	-0.625935	-0.090206	-0.774895	0.879931
chr3L-6921803	0.321719	-1.57517	0.291861	-0.260605	0.475336	1	8	9	0	0	0	0	-0.687869	-0.39119	-0.209754	0
chr3R-27335574	-0.535123	-1.28415	-0.179377	-0.031543	0.459941	0	0	1	0	0	0	0	-0.859247	-0.58307	-0.422892	0.991098
chr2L-19724602	-0.206104	1.85445	0.794875	1.32474	0.275	0	2	0	0	0	0	0	0	0	0	0.887147
chr3L-10312111	-0.599747	1.36169	-0.703057	-0.729692	0.412322	2	5	9	0	0	0	1	0.741833	0.686484	0.398833	0
chrX-16065097	-0.274915	1.36735	0.798356	0.319051	0.376271	0	9	7	0	0	0	0	0.953376	-0.019294	0.551527	0.822006
chr3L-20601818	-0.437049	0.054037	0.277488	0.610049	0.434146	0	5	7	0	0	0	0	-0.680539	-0.619324	-0.254862	0.889051
chr3L-22232545	-0.0678493	0.626947	1.17369	1.65007	0.456221	0	0	1	0	0	0	0	-0.148629	-0.224714	-0.080533	0.776938
chr3R-13056846	0.439331	-1.08392	1.24941	-1.71686	0.545455	0	0	0	0	0	0	0	0	0	0	0
chr2R-16596775	-0.170489	3.73638	-1.65632	-1.10134	0.437811	0	0	3	0	0	0	0	-0.556426	-0.985313	-0.887473	0.912145
chr2R-10234364	0.236473	-0.19108	-0.228486	-0.194014	0.454054	1	0	0	0	2	0	0	0.64382	0.521458	0.389614	0
chr3R-24231718	-0.692008	-0.5915	-0.160881	0.081381	0.433333	0	0	3	0	0	0	0	-0.385319	-0.365283	-0.783063	0.896552
chr4-347493	0.05477	-0.451929	-1.80857	-2.69936	0.361905	0	5	0	0	0	0	0	0	0	0	0
chr3R-17168906	-1.41915	0.064491	-3.19133	-3.10305	0.376106	2	0	0	0	1	0	0	0	0	0	0
chr3R-24047533	0.192293	0.389589	0.868927	0.936648	0.444444	0	0	0	0	0	0	0	-0.631247	-0.299425	-0.987124	0.896197
chr2R-17457925	-0.439288	-1.59393	-1.19658	-1.90959	0.432039	0	0	5	0	0	0	0	0	0	0	0.752212
chr2L-13996586	0.297079	-0.224923	-0.769956	-0.55958	0.380531	1	0	0	0	0	0	0	0.980968	1.11648	0.604621	0.922141
chr2L-21961708	0.615629	-2.54014	0.182161	0.464799	0.457875	0	7	9	0	0	0	0	-1.03111	-0.415132	0.202405	0
chr2L-3597438	0.386504	-0.137842	-0.783268	-0.046951	0.463415	1	9	11	0	0	0	0	-0.205025	-0.294226	-0.257004	0.917073
chr3L-10278858	-0.319936	-0.530992	0.380526	0.525	0.411483	2	7	9	0	3	0	0	-0.055449	-0.005692	-0.327764	0
chr2R-18409925	0.52588	-0.613599	-0.396149	-0.675625	0.475806	0	0	2	0	0	0	0	-0.802588	-0.269907	-0.003791	0
chr3L-9283429	-0.398233	0.65475	0.14075	0.348625	0.53	0	0	0	0	0	0	0	-0.372581	0.07038	-0.289863	0.758621
chr3R-19652473	-0.114502	-0.72755	-0.675	-0.869104	0.472637	2	2	3	1	0	0	0	0	0	0	0
chr2R-7842298	-0.140566	0.512665	-0.54184	-0.928231	0.386792	0	0	0	0	0	0	0	-0.451145	-0.183968	0.137131	0
chr3R-12544877	-1.74221	2.13689	-2.49344	-3.23881	0.422018	3	9	9	0	3	1	0	-1.32942	-1.49714	-1.00835	0
chr3R-17727797	0.143271	-0.643616	-0.367864	1.23843	0.446009	0	0	0	0	0	0	0	1.07164	1.35685	1.42213	0
chr2L-10478003	-0.0488707	0.69104	0.056846	0.338411	0.378505	0	0	0	0	1	1	0	0	0	0	0
chr2L-15364512	-0.367786	-0.123619	-0.2839	-0.415347	0.490348	0	5	11	0	0	0	0	0	0	0	0.984496
chr2L-13697109	0.540742	-0.531057	-0.317566	0.081509	0.403774	0	1	6	0	0	0	0	-0.678076	-0.271212	-0.953733	0.894519
chr2L-10478556	-0.228861	0.038909	0.164093	-0.333417	0.436293	1	0	0	0	1	1	0	0.462047	0.901638	0.287495	0
chr3L-8744891	-0.176522	-0.201431	-0.80875	-1.15065	0.495192	0	0	0	0	0	0	0	1.33953	1.45409	1.23485	0.706827
chr2L-4308573	0.409196	0.795972	-1.70874	-1.40956	0.418719	0	0	0	0	0	0	0	-0.184694	-0.256795	0.057781	0.771795
chr3L-13596341	-0.828789	2.44867	-0.293307	-0.328594	0.299479	0	0	3	0	0	0	0	0	0	0	0.8027
chr3L-20583791	-0.286685	0.336828	-1.12586	-1.50662	0.458955	0	0	6	0	1	0	0	-0.678763	-0.571652	-0.126076	0.889051
chr3R-8141033	0.57117	-0.660064	-0.074128	-0.096872	0.523404	0	6	9	0	0	0	0	0	0	0	0.824427
chr3R-9323141	-0.833998	0.158477	0.418289	-0.519605	0.447368	0	0	0	0	0	0	0	-0.207244	-0.152948	-0.393478	0
chr3R-24744426	-0.0566507	1.09266	0.110931	-0.171009	0.29653	0	0	0	0	0	0	0	-0.823233	-0.755714	-0.653296	0.80177
chr2R-6101488	-0.116597	0.163611	0.460856	0.766736	0.574074	3	0	1	2	6	1	4	0.535372	0.596948	0.468321	0
chr2L-1463728	-0.290916	-0.373316	-0.909455	-0.342228	0.366337	2	3	6	2	2	0	0	0	0	0	0
chr3R-3281073	-0.763496	0.57272	-2.92674	1.47752	0.462963	0	0	0	0	0	0	0	0.05033	0.289044	-0.169219	0.841941
chr2L-14500238	-0.68151	1.27424	-2.74167	-2.14758	0.380282	0	3	11	0	0	0	0	-0.549686	-0.10782	1.49338	0.928903
chr3R-1970803	0.43452	-0.766548	-0.625878	-0.567195	0.473171	0	0	0	0	0	0	0	0	0	0	0.877483
chr3L-5282949	-0.0444157	0.963301	-1.27921	-2.7844	0.504274	0	0	0	0	0	0	0	-0.165117	-0.183103	-0.685956	0.75395
chr3R-24323177	0.00648833	-0.880726	0.525603	0.40942	0.415179	0	1	4	0	0	0	0	0	0	0	0.896552
chr3R-21838800	-0.147173	-0.66728	-0.420343	-1.48194	0.406863	1	6	7	3	2	0	0	1.18943	1.47383	1.40151	0
chr3L-10927361	0.004435	-0.855847	0.62104	0.667148	0.496644	0	5	9	1	0	0	0	0.052187	0.434473	0.642237	0.793834
chr2R-17270195	-2.42005	2.02321	2.56528	1.24895	0.42	1	0	3	1	2	3	0	-0.076135	0.01854	0.219733	0.814324
chr2L-18790067	0.37454	0.336836	-0.266748	-0.334423	0.381119	1	9	11	0	1	0	1	1.17281	0.395797	-0.175082	0
chr3L-7130783	0.659317	-1.72715	-0.378123	-0.262759	0.471264	1	0	0	0	1	0	2	0.437984	-0.015355	0.142309	0
chr2R-18129472	-0.292671	0.056343	-0.292293	-0.180415	0.467249	1	9	11	0	3	0	4	0	0	0	0
chrX-19927156	-0.0418197	0.385298	0.667041	0.442294	0.444954	0	0	2	0	0	0	0	-0.229165	-0.767464	-0.467626	0.900161
chr2L-15778074	-0.939058	0.57333	-0.024294	-0.247634	0.354962	0	0	0	0	0	0	0	-0.067853	-0.446031	-0.97958	0
chr3R-25182316	-0.160501	0.97103	0.576137	0.21824	0.407725	0	0	0	0	0	0	0	-0.354205	-0.403268	0.175483	0.868307
chr3L-22561492	-0.395622	0.322614	-0.810106	-0.746567	0.450704	0	2	7	0	0	0	0	-1.21633	-0.459678	-0.278987	0.915809
chr3R-20509680	-0.851545	1.54529	0.449818	0.491457	0.291498	0	0	0	0	0	0	0	0	0	0	0
chr3L-13762221	-0.763699	0.11001	-0.160896	-0.479283	0.446215	0	0	3	0	0	0	0	-0.901672	-0.570022	-0.859951	0.8027
chr2R-20940842	0.275494	-1.69995	-1.124	-1.25377	0.37963	2	9	11	1	3	2	0	0.64046	0.533199	0.388912	0.931529
chr3R-12507627	0.214457	-1.45593	-1.48151	-1.94933	0.475096	1	9	9	0	1	0	0	-1.09054	-1.30746	-0.786326	0
chr2L-4786121	-0.486111	0.441556	0.449733	0.627267	0.502222	0	0	2	0	0	0	0	-0.63005	-0.512691	-0.630346	0
chr3R-18006129	-0.171097	-0.0260545	-0.656027	-0.449468	0.467681	0	1	1	0	0	0	0	-0.605596	-0.343958	-0.860389	0.874142
chr3L-13564786	-1.20104	-0.461989	1.32295	1.08524	0.452756	0	5	2	0	0	0	0	0	0	0	0.8027
chr3L-22295524	-0.274234	1.84298	1.13986	1.12096	0.263158	0	0	0	0	0	0	0	0	0	0	0
chr3R-17722018	-0.744244	0.704493	0.166806	0.668348	0.471366	0	0	0	0	0	0	0	0	0	0	0
chr3L-6426142	0.449602	-1.10596	0.060158	0.076824	0.504505	0	8	1	0	0	0	0	0	0	0	0.839735
chr3R-13457756	-0.357834	-0.578146	0.163927	-0.443991	0.451104	0	0	2	0	0	0	0	0.90844	0.205654	0.269236	0
chr2R-14775248	0.246014	-0.692063	-0.57447	-0.598641	0.483871	0	0	0	0	0	0	0	0	0	0	0.779817
chr2R-14459062	0.445869	-2.2618	-0.616878	-2.2897	0.478873	1	0	2	1	2	0	0	0.033166	0.678695	0.563336	0.991453
chr2R-15362881	0.182016	0.279418	-0.083574	-0.194869	0.344262	0	0	0	0	0	0	0	-0.439938	0.036133	0.069283	0
chr2R-15672581	0.58987	-0.790517	-0.262169	0.057542	0.416949	0	0	9	0	0	0	0	-0.687967	-0.539109	-0.334545	0.865994
chr2L-8663292	0.510116	-1.58735	2.58565	0.472465	0.4	0	0	0	0	0	0	0	0	0	0	0
chr3R-20987061	-0.861954	0.116898	-0.821682	0.165568	0.509091	0	2	4	1	0	0	0	-0.263786	-0.158135	-0.427782	0
chr3L-20624415	-0.849916	-1.04648	-1.87738	-1.1882	0.393822	1	9	9	0	1	0	0	0	0	0	0.889051
chr3L-22137994	0.285755	-1.39987	0.157075	-0.200094	0.415094	2	1	8	1	0	0	0	-0.487951	-0.403607	-0.141731	0.776938
chr3R-8884252	0.160745	0.425171	-0.358228	-0.43818	0.378641	1	9	9	0	1	0	0	0	0	0	0
chr2R-21003149	-1.95543	1.96083	-0.973602	-2.39711	0.417062	1	9	11	0	3	1	0	0	0	0	0.931529
chr3L-20627926	0.062581	0.639888	0.212134	0.299085	0.434959	1	9	9	0	0	0	0	-0.575168	-0.524885	-0.260999	0.889051
chr3L-4770376	-0.0960313	0.115191	-1.23311	-2.21383	0.495763	0	0	2	0	1	0	0	-0.625112	-0.5984	-0.776944	0.813483
chr3R-23029408	-0.383257	-0.395495	-0.376477	0.030298	0.485095	1	3	7	0	1	0	0	0.45621	0.579413	0.409048	0.875862
chr3R-24386198	-0.157407	-0.392646	-0.527463	-0.317049	0.439024	1	9	9	0	2	0	0	-0.324282	-0.311289	-0.262043	0
chr3R-3964583	0.84185	-1.71496	0.306366	-0.661718	0.471366	2	6	7	0	1	0	0	-0.188015	-0.473368	-0.291285	0.743802
chr3R-12771452	-0.40539	0.948617	-0.144468	-0.426511	0.429787	1	9	9	0	2	0	0	0	0	0	0
chr3R-20781908	-0.421464	1.35341	-0.024595	0.041791	0.516892	0	0	0	0	0	0	0	0.165598	-0.168299	-0.390212	0
chrX-15273014	0.0970333	-0.489463	-1.47382	-0.824975	0.455	0	1	6	0	0	0	0	0.443122	-0.15215	-0.197358	0.878788
chrX-12564054	-0.07468	1.97467	0.478916	0.984212	0.359606	4	0	0	0	2	0	3	1.03264	0.103825	0.580769	0
chr3L-931335	0.367156	-2.31091	-2.06154	-3.48532	0.338308	0	0	1	0	0	0	0	0	0	0	0.91236
chr3R-5287394	0.0476977	0.766185	-0.580502	-0.847289	0.409639	0	0	0	0	0	0	0	0	0	0	0.706215
chr2L-18719232	0.695876	-1.83478	-0.759169	-1.21246	0.471186	1	3	5	0	0	0	0	0.347025	0.310584	-0.009282	0.78836
chr3L-790927	0.605469	-0.988362	0.389574	0.314852	0.437037	5	0	5	3	2	0	1	1.75819	1.8336	2.02385	0.896552
chr2L-11786687	-0.668975	0.08473	-2.41338	-2.66432	0.408451	0	0	0	0	0	0	0	-0.244674	-0.300622	-0.383725	0.909314
chr3R-20796271	-0.014183	0.212657	-0.358277	-0.86	0.529126	0	0	3	0	0	0	1	0	0	0	0.751553
chr3R-6480882	0.10807	-0.395751	0.670788	0.500739	0.433498	1	9	9	1	1	0	0	-1.09319	-0.587889	0.935563	0.745098
chr3R-4706060	0.19414	-0.936412	-0.861726	-0.596009	0.426009	0	3	0	0	0	0	0	0.098994	-0.173282	-0.379909	0
chr3L-9986124	0.997982	-0.256502	0.089862	-0.623349	0.550459	0	0	0	0	1	0	0	-0.59097	-0.697091	-0.800049	0.895765
chr2L-20541472	-0.923057	-1.06274	-2.71374	-2.95415	0.417004	0	0	0	0	0	0	0	-0.860536	-0.454628	-0.955885	0.906191
chr2L-14502862	0.422519	-1.57464	-0.349424	-0.244908	0.529954	0	4	11	0	1	0	0	0	0	0	0.928903
chr2L-12210378	-0.231659	0.663534	0.194273	-1.46121	0.395455	0	0	0	0	0	0	0	0	0	0	0
chr3L-4676248	-0.272919	0.023821	-0.319151	0.749874	0.424528	0	0	2	1	0	0	0	0	0	0	0.813483
chr3R-24260396	-0.52852	0.447246	0.200616	-0.115344	0.423913	0	0	4	0	0	0	0	-0.582349	-0.517724	-0.817248	0.896552
chr2R-15955164	-0.372776	-0.863449	0.044802	-0.348678	0.422492	1	1	9	0	1	0	0	0.305168	0.453667	0.346193	0.865994
chr2R-15803462	0.242256	-2.47801	-1.73235	-3.29141	0.329759	0	0	9	0	0	0	0	0	0	0	0.865994
chr3R-1875799	0.101084	0.0088325	-0.380568	-0.460197	0.449782	0	0	0	0	0	0	0	-0.852515	-1.03364	-0.861283	0.877483
chr2R-6853327	-0.0976933	-0.702388	-0.496205	-0.551362	0.477679	0	1	1	0	0	0	0	0	0	0	0.799523
chr2L-4550645	-0.357996	-0.019344	-0.393134	0.378088	0.354839	0	2	2	0	0	0	0	-0.669311	-0.928817	-0.733831	0.90642
chr3R-13346335	-0.883106	-0.388443	-0.69428	-1.38309	0.428016	0	0	0	0	0	0	0	0	0	0	0
chr3R-17152663	0.213468	-0.197654	0.339077	-0.259	0.357692	0	0	0	0	0	0	0	-0.437019	-0.032574	0.103314	0
chr2L-13703019	0.300174	0.893697	0.217488	0.163934	0.402844	0	2	6	0	0	0	0	0	0	0	0.894519
chr3R-3242635	-0.234491	-0.600776	1.1935	0.506133	0.438424	0	0	1	0	0	0	0	-0.537257	-0.397767	-0.638175	0.841941
chr3L-10954520	-0.432821	-1.88922	-1.61812	1.12961	0.417431	0	7	11	0	0	0	0	0	0	0	0.793834
chr3R-20994264	-0.366917	-0.05085	-0.2463	-0.629375	0.505	2	2	4	1	2	0	0	0	0	0	0
chr3R-17764994	0.637626	-1.19602	2.6761	0.134892	0.480519	0	0	0	0	0	0	0	0.853057	1.48477	1.50685	0.745763
chr3L-13600752	-0.481385	0.505223	0.022956	-0.203044	0.435556	0	0	2	0	0	0	0	0	0	0	0.8027
chr2R-20185643	0.243868	-0.294254	-0.009787	-0.079403	0.485795	1	0	4	1	0	0	0	0.218642	0.092817	0.159848	0.72973
chr3L-21441624	-0.138476	-0.650972	-0.171261	-1.76323	0.465812	1	2	0	0	0	0	0	-0.00121	1.17538	0.309935	0
chr3R-9683563	0.0558793	0.817035	-0.001655	-0.116483	0.355172	1	5	7	0	1	0	0	-0.744969	-0.148909	0.169066	0
chr3L-15182525	0.791541	-2.59993	-0.947665	2.42052	0.485849	0	1	5	0	0	0	0	1.1595	1.63181	1.65169	0.86288
chr2R-10796680	-0.34045	-0.143673	-0.082407	0.37861	0.390042	0	0	1	0	0	0	0	0.918936	0.062992	0.480057	0
chr3L-6914447	-1.28484	-1.18452	-2.34146	1.4633	0.394531	1	9	10	0	0	0	0	-0.794619	-0.470061	-0.265984	0
chr3L-20570383	-0.811867	2.46334	-2.05039	-1.80363	0.369099	0	0	6	0	0	0	0	-0.659071	-0.527396	-0.107589	0.889051
chr3L-14864122	-0.571337	-0.086213	-1.47006	-1.3322	0.477612	0	0	0	0	0	0	0	-0.298034	0.353899	-0.488072	0.936416
chr2R-5519480	-0.039234	-0.463906	-0.729632	-0.69011	0.419118	0	0	0	0	0	0	0	0	0	0	0
chr2L-5333448	0.334439	-0.0006025	0.198341	0.281886	0.459091	0	0	0	0	0	0	0	0	0	0	0.751304
chr3R-9270650	0.038531	0.246864	-0.467839	0.081419	0.466102	0	0	0	0	1	0	0	-0.152347	0.039082	-0.370739	0
chr3R-21020515	0.283589	-1.78383	-0.649187	-0.777679	0.4689	0	1	4	0	1	0	1	-0.047902	-0.023974	-0.150683	0
chr3R-7354093	-0.87681	1.24341	-0.092768	-0.861223	0.450644	0	0	0	0	0	0	0	-0.588021	-0.602568	-0.438505	0
chr3R-19338505	-0.139363	-0.820152	-0.842957	-1.98385	0.534783	0	0	5	0	0	0	0	-0.649672	-0.296343	-0.460817	0.893345
chr2R-3948899	-0.553603	0.954237	-0.19386	-0.54625	0.492647	5	0	0	1	4	2	5	0.130351	-0.096813	0.040935	0
chr2L-15210070	-0.406151	0.916571	-0.532699	-1.486	0.411504	0	0	4	0	0	0	0	0	0	0	0.924675
chr3L-10787304	0.414444	1.61478	-1.43258	-2.40639	0.422535	0	0	0	0	0	0	0	0	0	0	0.766571
chr3L-14138431	-0.659219	2.2344	-3.44102	-3.06271	0.439024	1	9	11	0	1	0	0	-0.737903	-0.309943	-0.371495	0.878405
chr3R-24379879	0.774932	-2.26289	0.40163	-0.358611	0.533333	1	9	9	0	4	1	0	-0.360333	-0.355598	-0.253381	0
chr3L-10333806	-0.160931	-0.8629	-0.56021	-1.25506	0.369748	0	1	6	0	0	0	0	1.3875	0.928593	0.568226	0.916817
chr2L-17924907	0.061696	0.941136	0.121441	0.876572	0.432314	0	0	1	0	0	0	0	-0.489771	-1.00791	-1.03069	0.841775
chr2L-4625884	-0.19218	0.185338	0.481287	0.574093	0.405063	0	0	2	0	0	0	0	-0.581439	-1.00086	-0.753784	0.90642
chr3L-2926653	-0.195908	0.967183	-0.198698	-0.140693	0.377129	0	0	0	0	0	0	0	-0.647534	-0.79647	-0.852126	0.893939
chr3R-14862474	-0.625353	-1.05004	-0.90248	-1.70878	0.487805	1	0	0	0	0	0	0	0.023235	-0.194001	-0.192578	0
chr3R-3561096	0.234324	-1.46491	-1.96394	-2.56749	0.352657	0	0	1	0	0	0	0	0	0	0	0
chr3R-27312469	-0.810531	-0.12511	-0.588566	0.366633	0.434263	0	0	1	0	0	0	0	0	0	0	0.991098
chr3L-7030453	-0.188235	-0.705871	-0.473613	-0.482626	0.445378	0	0	2	0	0	0	0	0	0	0	0
chr3R-6318033	0.0605857	0.29273	-0.000732	-1.51402	0.422594	0	4	7	0	0	0	0	-0.797616	-0.810971	0.518917	0.787565
chr3L-22135364	1.11726	-1.67249	0.290943	-0.030833	0.508772	2	4	8	3	4	0	0	0	0	0	0.776938
chr3L-8751599	-1.63747	-1.68321	-0.804686	1.39275	0.444444	0	0	0	0	0	0	0	1.29949	1.42991	1.19805	0.706827
chrX-7150558	-0.070872	1.05523	0.414977	-1.19021	0.485981	0	6	7	0	1	0	0	-0.144639	-0.285828	0.608847	0
chr3L-7566523	0.289488	-0.099616	-0.685197	-0.527972	0.397638	0	0	0	0	0	0	0	-0.282242	-0.403226	-0.245073	0.926606
chr2R-20174244	0.239493	0.15152	-0.770403	-0.943919	0.534799	0	0	4	1	1	0	0	0.101412	-0.028921	0.005537	0.72973
chr3L-11382635	-0.324392	0.619858	0.532421	-0.108679	0.446541	0	0	0	0	0	0	0	0	0	0	0.880734
chr3R-17782387	0.577917	-1.72782	0.293247	0.002695	0.49026	1	0	0	0	1	0	0	0.126915	1.39432	1.1958	0.745763
chr3R-3160184	-1.06727	4.14016	-1.84038	-3.12764	0.451064	0	3	6	0	0	0	0	-0.564633	-0.346196	-0.481057	0.841941
chrX-15060677	-0.0563283	0.000489	-0.196771	-0.502565	0.431734	0	0	1	0	1	0	0	-0.058449	-0.14154	0.018275	0.86281
chr3R-12563960	-0.701923	-0.512178	0.866683	-1.53869	0.460396	1	9	9	0	0	0	0	0	0	0	0
chr2L-11335034	0.102756	0.681683	0.378462	0.969135	0.379808	1	9	11	0	0	0	0	-0.152423	-0.856053	-0.076757	0.853234
chr3L-6279279	0.162103	0.391199	0.153488	-0.188508	0.439516	0	0	5	0	0	0	0	-0.415915	0.152236	0.177257	0.839735
chr3R-23337686	-1.21783	0.536983	-0.15485	-0.671748	0.428571	0	0	0	0	0	0	0	0	0	0	0.871928
chr2L-4266971	-0.357382	-2.18397	0.485189	-1.93719	0.542453	0	0	1	0	0	0	0	-0.345769	-0.187231	-0.403591	0.771795
chr3R-9724423	0.628278	0.026462	-1.63417	-1.37215	0.40566	1	9	9	0	3	0	0	-0.556049	-0.549527	-0.202027	0
chr3L-6888564	-1.41746	0.153431	-1.83728	-2.55226	0.5	1	8	11	0	2	0	0	0	0	0	0
chr2R-15727268	0.403515	1.34902	-1.67867	-1.77813	0.459716	0	0	9	0	2	0	0	0.312784	-0.266577	0.338372	0.865994
chr3R-6337654	0.167845	-0.406656	0.241422	0.248356	0.466667	0	1	6	0	0	0	0	0	0	0	0.787565
chr2L-11972403	-0.095531	1.72529	0.697637	1.23356	0.482587	1	0	1	0	1	0	0	0	0	0	0.783333
chr2L-12802829	0.04331	-1.17127	-0.834155	-0.534954	0.43379	0	0	0	0	0	0	0	-0.02615	0.722671	0.335374	0.799414
chr3R-12519676	-0.523341	-0.258867	0.519664	-0.630202	0.488789	1	9	9	0	1	0	0	0	0	0	0
chr2R-7206214	-0.575437	-0.964829	-1.08858	-0.880043	0.493562	0	0	2	0	0	0	0	0	0	0	0.840336
chr3R-17723554	0.317834	-0.831071	-0.780968	-0.916774	0.516129	1	0	0	0	0	0	0	0	0	0	0
chr3R-6400969	0.557758	-0.574738	0.079925	-0.07045	0.405	0	2	6	0	0	0	0	-0.58628	-0.042258	0.037827	0
chr3R-27357457	-0.313079	-1.4886	-1.20588	0.990643	0.461847	0	0	1	0	0	0	0	0	0	0	0.991098
chr2L-18744496	0.144371	-1.64573	-0.971932	-1.09339	0.445455	1	9	11	0	0	0	0	0.318295	0.21792	-0.13152	0.78836
chr3R-23919824	-1.02445	-1.57281	-1.65252	0.295917	0.503597	0	0	0	0	0	0	0	-0.72086	-0.476164	-0.949303	0.896197
chrX-22054144	-0.0180353	-0.11182	-0.230179	-0.053705	0.401786	0	1	0	0	1	0	0	0.122912	-0.487147	-0.556371	0.926916
chr2L-495458	0.504179	-0.618588	2.23143	-0.565311	0.401914	4	0	6	1	1	0	0	1.50177	-0.006619	0.997599	0
chr2R-16412134	-0.0942383	-0.706705	-0.827161	-1.16698	0.492857	0	0	1	0	0	0	0	0	0	0	0.828125
chr3R-22193962	-0.163956	0.983946	0.284659	0.345181	0.493976	0	0	0	0	0	0	0	-0.409807	0.090129	-0.470011	0.931608
chr2R-20623237	-0.626171	1.24413	0.010717	-0.399668	0.468531	0	0	2	2	1	0	0	0	0	0	0.813084
chr2R-20209118	-0.502451	1.1477	1.66083	-1.56296	0.508333	3	0	3	2	1	1	1	0.052202	0.256665	0.406807	0.72973
chr3R-12561690	-0.380516	-0.027667	-0.513786	-0.280833	0.452381	1	9	9	0	1	0	0	-1.36235	-1.39644	-0.997786	0
chr3R-24808637	0.241784	-0.556097	-0.053019	-0.710425	0.429245	0	0	1	0	0	0	0	-0.240396	-0.281216	-0.296733	0.80177
chr2L-15415139	0.060238	-0.367808	-1.05695	-0.997266	0.458128	0	6	11	0	0	0	0	-0.481869	-0.951496	-0.987145	0.984496
chr3R-8607085	-0.0210693	1.16331	-0.78306	-1.02271	0.447761	0	0	1	0	0	0	0	-0.666046	-0.097689	-0.434591	0.850508
chr2L-14828829	-0.178119	0.825138	0.403359	0.332837	0.429448	0	0	1	0	0	0	0	0	0	0	0.838748
chr2R-15782276	-1.04488	-0.524131	-0.575718	0.97213	0.375	0	0	9	0	0	0	0	0	0	0	0.865994
chr3L-10925448	-0.278577	-0.569743	-0.265316	-0.156087	0.391304	0	5	9	0	0	0	0	0.071811	0.438483	0.633654	0.793834
chr3L-5379204	0.490024	0.343349	-0.603083	-1.01689	0.451456	0	0	2	0	0	0	0	-0.62909	-0.444893	-0.625049	0
chr3R-8723380	-0.0919407	0.175211	-0.115117	-0.268779	0.441315	0	0	1	0	0	0	0	-0.611892	-0.332297	-0.553642	0.850508
chr2R-18145040	0.076024	-0.984372	-0.34648	-0.264865	0.44843	1	9	11	1	3	2	0	0	0	0	0.872024
chr3L-6614128	-0.15257	0.98194	0.134726	0.142886	0.432836	0	0	0	0	0	0	0	0	0	0	0
chr2L-3666540	-0.316033	1.03558	0.610491	0.895662	0.354701	1	9	11	0	0	0	0	0.259743	-0.073048	-0.195489	0
chr2L-21872105	-0.597679	-0.976677	2.29947	1.71004	0.514768	2	9	11	2	2	0	0	-0.391582	-0.818533	0.039175	0
chr3L-21644317	0.0999917	-1.45234	0.044179	-0.06806	0.487562	1	0	1	0	2	0	0	0.005315	0.226706	-0.146149	0.828154
chr2L-8579540	0.482719	-2.11246	-0.263519	-0.692209	0.480583	1	0	0	0	1	0	0	0	0	0	0
chr3L-14803884	0.130747	-1.08343	-1.66569	-2.25127	0.443983	0	0	0	0	0	0	0	-0.157072	0.384045	-0.404132	0.936416
chr2L-1457075	0.10178	-0.9454	-0.408083	-0.266481	0.514563	2	3	6	0	0	0	0	0.22174	1.64336	1.33928	0
chr3R-17359649	0.11798	0.42271	-0.19302	-0.37992	0.48	1	7	9	0	1	0	0	-0.225252	-0.065368	1.20249	0
chr3L-5948083	0.311149	-1.28494	-0.199303	-0.089203	0.466135	0	0	5	0	0	0	0	0	0	0	0
chr3L-14868673	0.354329	-0.261335	-0.20629	-0.595679	0.461538	0	0	0	0	0	0	0	0	0	0	0.936416
chr2L-722712	-0.783062	-0.913314	0.462349	0.513	0.469767	0	0	4	0	0	0	1	0	0	0	0.913706
chr3R-3285755	-0.183652	0.291361	0.464894	0.37266	0.370213	0	0	0	0	0	0	0	0.104982	0.392859	-0.068822	0
chr3R-19278276	-0.413522	0.733791	0.919254	0.277258	0.423387	0	0	5	0	0	0	0	-0.604174	-0.526876	-0.438688	0.893345
chrX-15270793	-0.567508	-0.172586	-0.373382	-0.291275	0.416667	1	4	6	0	0	0	0	0.457237	-0.129251	-0.182761	0.878788
chr2L-9723185	-0.173357	2.78985	1.45434	1.42158	0.25	0	0	0	0	0	0	0	0	0	0	0
chr3R-7160461	0.129585	1.04284	0.169357	0.418195	0.448133	0	2	7	0	0	0	0	-0.360915	-0.215897	-0.373628	0
chr3R-23191696	-0.71521	0.495969	-0.624414	-0.486104	0.355856	0	0	0	0	0	0	0	-0.916213	-0.255218	-0.780404	0.871928
chr3R-6306741	0.119191	-1.25436	-1.30056	-1.57978	0.382353	0	4	7	0	0	0	0	0	0	0	0.787565
chr3R-2430334	-0.300121	-1.91898	-0.681667	0.020121	0.478261	0	0	1	0	0	0	0	-0.609557	-0.730494	-0.992105	0.904573
chr2R-13008507	0.530914	-1.35205	-0.398374	-0.077451	0.509709	0	0	1	0	0	0	0	0	0	0	0.850178
chr2L-20843843	-0.0282137	-0.621865	-0.140042	-0.027225	0.394068	0	0	1	0	0	0	0	0	0	0	0.862348
chr3R-3115843	-0.233197	-2.74906	0.375024	-0.761538	0.466346	0	0	1	0	0	0	0	-0.694247	-0.398463	-0.616462	0.841941
chr3L-21812516	-0.196057	2.3764	-0.717736	-0.478898	0.366142	1	8	8	0	1	1	0	-0.080742	-0.189557	-0.026162	0
chr3L-9145776	0.03662	-0.634004	-0.40838	-0.37963	0.375	0	0	0	0	0	0	0	-0.178987	0.371619	-0.561219	0
chr3R-8714625	-0.031837	-0.523279	-0.446186	-0.874581	0.348837	0	0	1	0	0	0	0	-0.575106	-0.324868	-0.545073	0.850508
chr3L-19102251	-0.410495	0.905757	-0.370534	-0.917478	0.507418	0	0	0	0	0	0	0	-0.142584	0.363709	1.05155	0.736986
chr3R-25663351	-0.0968343	-1.92508	-1.49455	3.17368	0.492823	0	0	0	0	1	0	0	0	0	0	0
chr2L-9850220	0.00549567	0.208739	0.235135	-0.143468	0.454955	0	0	0	0	0	0	0	-0.499808	0.630559	-0.535732	0
chrX-12365028	0.0706623	1.35391	1.03788	1.47227	0.388646	0	0	0	0	0	1	3	0	0	0	0
chrX-16366466	0.0468867	0.611136	0.092045	-0.113781	0.409091	0	6	0	0	1	0	0	1.08639	-0.040796	0.457346	0.915344
chr3R-24054245	-0.176702	0.40179	0.018456	-0.120474	0.424561	0	0	0	0	0	0	0	0	0	0	0.896197
chr3R-17106445	-0.119376	-2.16905	-0.757365	-1.32941	0.512315	0	0	0	0	0	0	0	0.301632	0.562706	0.144168	0
chr3L-6267241	0.0641147	0.853869	0.429979	0.521286	0.419087	0	0	1	0	0	0	0	0	0	0	0.839735
chrX-13800621	0.556871	1.13631	0.491557	0.06408	0.438679	0	0	2	0	0	0	0	0.183281	-0.112564	0.002614	0
chr3R-18301481	0.775015	0.578445	-1.09453	-0.69795	0.378378	0	0	0	0	0	0	0	-0.196103	0.11721	-0.392731	0
chr2L-17771315	0.493899	1.53104	-2.06486	-1.81476	0.416268	0	1	2	0	0	0	0	-0.573704	-1.10318	-0.776874	0.841775
chr3R-10275833	-0.492631	-0.523507	-0.200185	1.05403	0.407407	1	0	0	0	1	0	0	0	0	0	0.894737
chr2R-19470168	-0.0221887	-1.04315	-0.569742	-0.606781	0.373391	5	0	7	4	3	1	0	-0.269126	0.099259	-0.125831	0.747405
chr3R-20519605	-0.50742	2.18815	0.526111	0.540939	0.287356	0	0	0	0	0	0	0	-0.378578	-0.608217	-0.6243	0
chr2L-19229881	0.697	-1.09713	-0.872327	-1.07829	0.485714	0	5	10	2	1	0	0	0	0	0	0.875256
chr2L-9284801	-0.0922033	-1.26341	0.03069	-1.06981	0.430962	0	0	0	0	0	0	0	-0.454751	0.153129	-0.120895	0.891089
chr3R-17759994	0.317258	-0.987352	0.217734	0.027315	0.453202	0	0	0	0	0	0	0	0	0	0	0.745763
chr3L-21784762	0.251017	-0.556709	-0.284081	-0.997904	0.514706	1	9	8	0	0	0	0	0	0	0	0.828154
chr3L-10378971	-0.348206	0.888469	0.022656	-0.192225	0.38756	0	1	4	0	1	0	0	0	0	0	0.916817
chr3L-22364591	-0.814226	0.215546	2.73433	-0.422798	0.43254	1	0	0	0	2	0	0	-0.886522	-0.868873	-0.149663	0.915809
chr3R-11946119	0.398434	-0.777458	-0.770418	-0.642759	0.538462	0	0	0	1	1	0	0	0.759194	0.368604	0.579128	0
chr3L-14842801	-0.467838	0.528393	-0.792032	3.41417	0.431095	0	0	1	0	0	0	0	0	0	0	0.936416
chr2L-20548319	-0.433603	-1.40623	-1.01946	-0.974215	0.430493	0	0	0	0	0	0	0	-0.82528	-0.375747	-0.935398	0.906191
chr3R-22419908	-0.565559	1.00761	0.044003	0.155647	0.339161	0	0	0	0	0	0	0	-1.16863	-0.89349	-0.911048	0.872774
chr3R-11119616	-1.12656	2.94337	0.723824	-0.579583	0.436274	5	0	0	4	4	1	1	0.304726	0.422168	0.085664	0
chr3R-20255063	0.107288	-0.598159	-0.298795	-0.739023	0.522727	0	0	0	1	0	0	0	-0.383685	-0.166855	-0.703202	0
chr3R-23639782	-0.360116	-0.0306845	-0.527717	0.060891	0.469565	0	0	0	0	0	0	0	0	0	0	0.870259
chr3R-22469863	-0.0726993	-0.0844365	0.009507	-0.339883	0.507042	0	0	0	0	0	0	0	0	0	0	0.872774
chr2R-14153019	-0.602253	1.9348	0.506355	0.936177	0.503226	0	0	8	0	0	0	0	0.077937	-0.222098	0.141675	0
chr3L-12544497	0.868145	-2.96821	-0.090024	0.769599	0.476415	1	3	4	2	0	0	0	0	0	0	0
chr3R-19193731	-0.118772	0.621939	0.057293	-0.185195	0.521951	0	0	1	0	0	0	0	0	0	0	0.893345
chrX-9633108	0.027536	0.470348	-0.583964	-0.302125	0.439286	1	9	7	0	0	0	0	-0.152934	-0.564302	0.151748	0.820856
chr2L-7372439	-0.794909	-0.201523	-1.94318	-1.89311	0.486364	1	6	9	0	1	0	0	0.738917	0.476665	0.405153	0.941704
chr2L-3552664	-0.17427	-1.19368	-0.879585	-0.559424	0.506912	1	9	11	1	0	1	0	-0.085588	0.098368	-0.146302	0.917073
chr3L-14611061	-0.362024	-0.095189	0.285756	-0.426555	0.415966	0	4	2	0	1	0	0	0.604778	0.66384	0.821439	0
chr3R-8703947	0.215825	-0.468714	-0.027816	0.00267	0.441748	0	0	1	0	0	0	0	-0.470442	-0.263326	-0.497657	0.850508
chr3L-14139112	-0.153009	0.237245	0.202407	0.076065	0.462963	1	9	11	1	0	0	0	0	0	0	0.878405
chr3R-20977737	-0.43477	-0.103667	0.22331	0.944262	0.552381	2	2	4	0	1	0	0	0	0	0	0
chr2R-9486567	-0.297017	0.778075	-0.33805	-1.0644	0.48	0	0	0	0	0	0	0	0.257718	0.410903	-0.042574	0
chr3R-9323581	-0.35812	0.162113	0.141881	0.303982	0.380531	0	0	0	0	0	0	0	0	0	0	0
chr3R-8724746	-0.372298	-0.217808	-0.450114	-1.79144	0.461187	0	0	1	0	0	0	0	-0.618925	-0.332059	-0.55482	0.850508
chr3L-10242874	-0.213799	1.88101	-1.01689	-1.31056	0.485294	0	8	9	0	1	0	0	0	0	0	0.895765
chr3R-1799690	0.404844	-0.638028	0.446455	0.170775	0.464789	0	0	0	0	0	0	0	-0.512257	-0.629717	-0.914914	0.879781
chr2L-5644125	-0.269974	0.0344355	0.037004	-0.209825	0.404669	0	1	7	0	0	0	0	0	0	0	0
chr2L-8804528	-0.0432513	-1.20543	-1.29658	0.000271	0.453202	1	8	10	0	0	0	0	-0.695719	-0.099795	-0.280556	0.893987
chr2L-15398259	0.184244	-0.306204	-0.356075	0.087921	0.485981	1	6	11	0	0	0	0	-0.552844	-0.97387	-1.05342	0.984496
chr3R-980460	-7.9e-05	-1.71876	-0.325755	-0.91309	0.396226	0	0	0	0	0	0	0	0.266482	-0.281178	0.671574	0.814469
chr3L-6797412	-0.374587	0.899431	-0.395569	0.110644	0.356436	0	7	11	0	0	0	0	0	0	0	0.746888
chr3R-12494298	-0.110206	-0.639768	-0.309668	0.030465	0.433628	1	9	9	0	0	0	0	0	0	0	0
chr3L-10960822	-0.102058	-0.38498	-0.960438	-1.19693	0.505976	1	8	11	1	0	0	1	-0.230559	0.381104	0.370519	0.793834
chr3L-6290105	0.426918	-0.289635	0.392995	0.075967	0.476415	0	1	5	0	0	0	0	-0.515924	-0.044081	0.044191	0.839735
chr2L-2469370	-0.504392	-0.050853	-0.494682	-0.759983	0.45485	0	5	10	0	0	0	0	0.179142	-0.265314	-0.292213	0.799642
chr2L-13654754	0.596913	-0.339228	0.634435	0.530283	0.478261	0	0	0	0	0	0	0	0	0	0	0
chr3R-10601477	0.0182397	-0.115876	-0.230325	-0.129675	0.359307	0	0	0	0	0	0	0	-0.409873	-0.065484	-0.214243	0.839181
chr2R-21003544	-0.566271	0.338678	-0.409238	-1.56262	0.394619	1	9	11	0	4	2	0	0.155244	0.417809	0.276825	0.931529
chr3R-12881949	-2.99107	1.81394	2.08657	0.234931	0.509259	6	0	0	4	5	3	5	0.533465	0.382665	0.313911	0
chr2R-7710762	-1.10993	0.267182	-2.53086	-2.07348	0.490909	0	0	2	0	0	0	0	0.1123	0.270188	0.325857	0
chr2R-6112895	0.0928287	1.45076	-0.055409	-0.14226	0.5625	2	0	1	0	2	0	4	0.521791	0.605035	0.550432	0
chr3R-17169884	0.142327	-0.91378	0.208623	0.352319	0.429952	1	0	0	0	2	0	0	0	0	0	0
chr3L-14164924	0.0434537	-0.120117	0.057373	0.213432	0.436441	2	9	11	1	2	1	0	-0.664938	-0.302463	-0.343568	0.878405
chrX-16059790	-0.207352	-0.667902	-0.090608	-0.159854	0.425791	1	9	7	0	0	0	0	0.873621	-0.024055	0.541396	0.822006
chr3L-12708430	-0.280481	-0.517338	0.362811	0.316194	0.313433	1	8	10	0	0	0	0	0.147651	0.057718	-0.013295	0
chr3R-17750935	-0.384335	0.863263	0.225	0.548941	0.428571	0	0	0	0	0	0	0	1.17678	1.44322	1.61113	0.745763
chr3R-22470568	-0.493294	0.512818	0.768099	1.58467	0.42723	0	0	0	0	0	0	0	0	0	0	0.872774
chr2L-844921	-0.081886	-0.811463	0.346756	0.22022	0.517073	5	0	0	2	3	0	3	0	0	0	0
chr3L-13777569	0.018668	0.887916	-0.210613	-0.927353	0.490196	0	1	3	0	0	0	0	0	0	0	0.8027
chr2R-8381982	0.661067	2.26796	-1.18449	-2.04514	0.476636	0	0	0	0	0	0	0	0.289024	0.382257	-0.221326	0
chr3R-20916288	-0.987635	-0.503529	-2.51063	-0.662992	0.489899	1	9	9	2	3	1	0	0.353691	-0.014419	-0.140676	0
chr4-346155	0.518565	-1.93889	-2.63429	-3.78404	0.382927	0	5	0	0	0	0	0	0	0	0	0
chr3R-1779035	-0.162322	0.65357	-0.613905	-0.493259	0.422886	0	0	0	0	0	0	0	-0.425587	-0.674535	-0.971419	0.879781
chr3R-13194294	-1.54424	0.667827	-2.17664	-0.380631	0.406542	0	0	0	0	0	0	0	-0.72091	-0.59473	-0.705672	0
chr2L-2473928	-0.110403	-1.15191	-0.533771	-0.164788	0.398305	0	3	9	0	0	0	1	0	0	0	0.799642
chr2L-15929265	0.190038	1.29584	0.7355	0.850909	0.418182	0	0	1	0	0	0	0	1.06876	0.292751	-1.15148	0.925602
chr3R-21910394	-0.143441	0.053883	-1.04171	-1.68972	0.488636	0	7	8	0	0	0	0	0.869561	1.41301	0.548665	0
chr2R-18925507	0.306693	0.910107	0.93644	0.544105	0.552529	1	9	9	0	1	0	0	-0.504901	-0.677226	-0.156109	0.851735
chr3R-18002277	-0.213953	-0.303771	-0.281624	-0.03735	0.42735	1	1	1	0	0	0	0	-0.583389	-0.337466	-0.838624	0.874142
chr3L-3696923	-0.509084	0.950584	0.733964	0.637484	0.398026	0	2	9	0	0	0	0	0.225254	-0.413203	-0.458308	0.939394
chr3R-5424390	0.266018	0.530258	1.15857	0.576687	0.404762	4	0	0	1	1	0	1	0	0	0	0
chr3R-1941120	0.0220093	1.09546	-0.190841	-0.154953	0.448598	0	0	0	0	0	0	0	-0.634283	-0.908601	-0.993698	0.877483
chr3L-5157894	-0.012572	0.680308	0.12484	0.573151	0.319635	0	0	0	0	0	0	0	-0.206097	-0.401803	-0.080244	0
chr3R-6643557	0.496811	-1.06787	0.593379	0.299429	0.47032	0	0	0	0	0	0	0	0.207791	0.023653	-0.004626	0
chr3R-14165488	-0.369499	0.575789	0.399778	0.342759	0.413793	0	0	0	0	0	0	0	0	0	0	0
chrX-2810056	0.176958	0.706117	-0.029053	-0.231408	0.466019	0	0	1	0	0	0	0	0	0	0	0.804404
chr3R-25088789	-0.587198	-1.97712	-0.288799	-0.890546	0.449782	3	0	0	1	2	0	0	1.19795	1.22588	1.39633	0.868307
chr2L-2425845	-0.004881	-1.17389	-0.159887	-0.517113	0.486792	0	0	6	0	0	0	0	0.120565	-0.017363	0.226545	0.799642
chr3L-15218659	0.144379	-1.46215	-0.376023	-0.61586	0.534884	3	5	8	1	6	0	0	1.36488	1.6163	1.56658	0.86288
chr2R-15594404	-0.515802	0.63498	-0.510391	-0.192798	0.325103	0	0	1	0	0	0	0	0	0	0	0.865994
chr3R-6264940	-2.35245	-0.0199775	-0.415991	3.36781	0.436937	0	0	7	0	0	0	0	0	0	0	0
chr3R-19260221	-1.30218	-0.177628	-0.632539	-1.84837	0.42126	0	0	5	0	0	0	0	-0.58387	-0.470937	-0.453287	0.893345
chr2L-4592315	-0.092907	-0.775461	-0.357049	-0.54047	0.432331	0	0	1	0	0	0	1	0	0	0	0.90642
chr3L-9596144	-1.01302	-0.236306	-1.30719	-0.170631	0.45045	0	1	2	0	0	0	0	-0.248751	0.028786	-0.189228	0
chr3L-6354164	-0.370683	0.906662	0.619363	0.582452	0.404432	0	2	5	0	0	0	0	-0.653172	-0.108063	-0.133861	0.839735
chr2R-18047065	0.459719	-0.9175	0.181963	-0.00092	0.444785	1	0	4	1	3	0	0	-0.446757	-0.33441	-0.365926	0
chr3R-19333399	-0.152582	-0.773577	-0.851676	-0.743396	0.424856	0	0	5	0	0	0	0	-0.656715	-0.338736	-0.463934	0.893345
chr3R-12066770	-1.40521	0.849584	0.657429	0.755714	0.442857	8	0	0	8	1	0	4	1.06278	0.700717	1.34166	0
chr3R-10286353	-0.8455	0.73075	1.09793	0.2592	0.375	0	0	0	0	0	0	0	-0.686388	-0.343406	-0.396702	0.894737
chrX-11825317	-0.617584	3.90074	1.68967	1.91335	0.1777	0	0	0	0	0	0	0	1.35745	0.588156	0.759825	0.945619
chr3R-8650765	-0.326444	1.14577	-2.57031	-1.15794	0.443137	0	0	1	0	0	0	0	-0.413812	-0.228645	-0.538546	0.850508
chr3R-12077572	-0.364423	0.604379	1.34724	1.59993	0.492683	10	0	0	8	6	1	3	0.57785	0.55966	1.16789	0
chr3L-4008346	0.061996	-0.856112	-0.303786	-0.920226	0.469136	1	2	8	0	0	0	0	0	0	0	0
chr3L-10983973	-0.333039	0.194061	-0.083416	-0.24871	0.506787	1	8	11	1	1	0	0	-0.103761	0.274376	0.124508	0.793834
chr3L-9869521	-0.603203	0.302476	-0.619488	-1.12971	0.395122	0	0	0	0	0	0	0	0.341608	0.339127	0.427726	0
chr3R-17587956	0.108829	-2.33406	-1.64851	-3.07122	0.327078	0	1	0	0	0	0	0	0	0	0	0.982143
chr2L-20501672	0.166713	-1.02553	-0.332271	-0.844472	0.426605	0	0	0	0	0	0	0	0	0	0	0.906191
chr3L-15219767	0.320254	-0.366509	0.486182	0.515909	0.523636	1	5	8	1	1	0	0	0	0	0	0.86288
chr3R-8173462	-0.307063	-0.659806	3.397	0.631117	0.492908	1	2	3	0	1	0	0	0	0	0	0
chr3R-10931197	0.160858	-1.71532	-1.54743	-1.90532	0.38	0	0	0	0	0	0	0	0	0	0	0
chr3L-12723763	-0.329779	0.53976	0.242147	-0.240315	0.387387	1	1	1	0	1	0	0	0.007896	0.043413	-0.076043	0
chr2R-15825155	-0.525833	1.26584	-0.480779	-2.01852	0.451299	1	0	9	1	1	0	0	-0.227693	-0.497928	0.342072	0.865994
chr3L-12308290	-0.178631	0.0928235	0.214152	0.233996	0.330357	1	8	10	0	0	0	0	-0.392533	-0.056178	-0.402783	0
chr3L-6347728	0.379074	-0.797296	0.677179	-0.282927	0.470085	0	1	5	0	0	0	0	-0.639524	-0.146089	-0.177985	0.839735
chr3L-20673055	-0.66871	0.216905	-0.252917	-0.035268	0.389881	0	9	9	0	0	0	0	0	0	0	0.889051
chr3R-9015705	-0.0783413	0.599263	0.239631	0.446659	0.410138	0	0	0	0	0	0	0	0	0	0	0.914347
chr2R-15692073	1.00801	0.97031	-1.10152	-1.72626	0.452381	1	0	9	0	0	0	0	-0.461514	-0.458979	-0.073727	0.865994
chr2L-15859527	0.560438	-1.47123	-0.081507	0.260766	0.526316	0	0	3	0	0	0	0	0	0	0	0.925602
chr3L-11465818	-1.07089	-0.130682	0.135	1.49885	0.373206	1	0	0	1	1	0	0	0.714389	1.67111	0.929043	0.880734
chr2L-15619104	-0.371936	0.451555	0.438364	-0.455829	0.479263	0	0	3	0	0	0	0	-0.11698	-0.510054	-1.00976	0.870528
chr3L-14133996	-0.606611	-0.502008	-1.22548	-1.10485	0.389121	1	9	11	0	1	0	0	-0.742944	-0.277916	-0.367608	0.878405
chr3L-13567305	-0.498333	0.967464	-0.731789	-1.24211	0.485294	0	5	2	0	0	0	0	0	0	0	0.8027
chr3R-3107633	0.582897	-0.773446	0.000843	1.58691	0.516854	0	0	1	0	0	0	0	-0.667476	-0.36107	-0.628361	0.841941
chr3R-24468946	-0.535242	1.24802	-0.859575	-2.49553	0.43	0	0	0	0	0	0	0	0	0	0	0
chrX-18475188	-1.23445	-0.018375	0.35025	-0.938932	0.427273	0	4	7	0	0	0	0	-0.001252	-0.481685	-0.1522	0
chr2R-20250711	0.323776	-0.743327	0.122087	0.793565	0.547826	1	9	11	2	1	1	0	0	0	0	0.72973
chr3R-24833404	-0.167246	1.41669	0.786408	0.963099	0.347418	0	0	1	0	0	0	0	0.293409	0.222681	0.028487	0.80177
chr2L-7950084	0.877979	-1.99493	-0.094708	-0.514937	0.470833	0	0	0	0	0	0	0	-0.37701	-0.164289	-0.308365	0
chr3L-21591541	0.00324433	0.818665	0.569393	-0.729927	0.601942	1	9	9	1	4	3	0	0	0	0	0
chr2L-15359849	-0.28197	-0.95218	-1.26843	-0.066143	0.453488	0	5	11	0	0	0	0	0	0	0	0.984496
chr2R-19760725	-1.81226	0.52372	0.034179	1.37505	0.454106	5	0	0	3	3	3	5	0.29223	0.497424	0.651717	0
chr3L-21779336	0.174642	-0.357088	0.633675	0.42825	0.365	1	8	8	0	0	0	0	-0.485522	-0.65278	-0.411549	0.828154
chr3R-25348298	-0.30238	-0.727151	-0.474694	-0.404061	0.449782	1	9	9	0	1	0	1	0	0	0	0.71408
chr3R-24238816	-0.344247	-1.26226	0.435922	-1.5438	0.451613	0	0	3	0	0	0	0	-0.363167	-0.391938	-0.790874	0.896552
chr3R-19306538	-0.501963	0.312617	-0.579089	-1.15187	0.420561	0	0	5	0	0	0	0	-0.64571	-0.529042	-0.495216	0.893345
chr3R-9565501	0.267385	-1.17874	0.131987	-0.067071	0.426778	2	0	0	0	0	0	0	-0.656773	-0.284791	-0.29055	0
chr2L-4728141	-0.0428897	-0.300438	-0.162263	0.29281	0.485401	0	0	1	0	0	0	0	-0.661884	-0.886594	-0.911496	0.90642
chr3R-25400711	0.220675	-0.790821	0.264015	-0.620803	0.423358	1	9	9	0	0	0	0	-0.75452	-0.827393	-0.391583	0.71408
chr3L-6348665	0.420412	-0.677434	0.980114	-1.15304	0.51711	0	1	5	0	0	0	0	-0.641996	-0.140199	-0.172237	0.839735
chr2L-14750494	0.385919	-1.25798	-0.27625	0.047155	0.482759	0	0	1	0	0	0	0	-0.40304	-0.731521	-0.58167	0.838748
chr3L-6802954	0.706008	-0.966233	-0.313412	-0.929678	0.476395	0	6	11	0	0	0	0	0	0	0	0.746888
chrX-7376494	-0.219432	0.337944	0.597955	0.066318	0.368182	0	0	2	0	0	0	0	0	0	0	0.88984
chr2R-6399704	-0.285261	3.13113	1.11971	1.37064	0.245098	0	0	0	0	0	0	0	-0.146443	0.280709	0.629301	0
chr3R-9622629	0.820772	-1.31676	-0.098523	0.314886	0.440909	1	2	2	0	5	0	2	0.098049	0.724305	0.884596	0
chr3L-9193847	0.182811	-0.689182	-0.696705	-0.869263	0.479263	0	0	0	0	0	0	0	0.069108	0.493821	0.013746	0
chr2L-19618720	0.0664837	0.848322	-0.182123	0.012329	0.39726	0	0	1	0	0	0	0	0	0	0	0.887147
chr3R-24261804	-0.0280747	0.483428	0.058694	0.01449	0.436735	0	0	4	0	0	0	0	0	0	0	0.896552
chr3L-14093848	-0.324269	2.61417	-2.21421	-3.00956	0.339901	0	5	8	0	1	0	0	-0.022442	0.333574	-0.282358	0.878405
chr3L-14811059	-0.001186	1.73993	0.51066	0.49135	0.334356	0	0	2	0	0	0	0	-0.091078	0.372981	-0.454092	0.936416
chr3L-17170600	0.0839633	-1.00092	-0.182419	-0.33447	0.37788	0	0	0	0	0	0	0	-0.773601	-1.07232	-0.837871	0.808765
chr3L-8490726	0.339524	-2.05627	-0.850402	-0.925804	0.486607	0	8	0	0	0	0	0	0	0	0	0
chr3L-9024007	-0.694929	-1.35766	-0.771816	-2.42224	0.514151	1	9	11	1	3	0	0	0.504522	0.363094	0.030843	0.774775
chr3L-6799863	0.223729	-1.14378	-0.703093	-0.384689	0.424125	0	7	11	0	0	0	0	-0.57112	-0.722643	-0.092252	0.746888
chr3L-13995837	-2.98729	1.34983	0.802382	0.720189	0.429245	5	0	0	5	0	9	3	0.360165	0.413927	0.127999	0
chr3L-14563320	-0.164388	0.478197	-0.075	-0.252093	0.516279	1	8	10	0	1	1	1	0.498704	0.823898	0.725673	0
chr3R-12521109	-0.268156	-0.877351	-0.701468	-0.645872	0.489362	1	9	9	0	0	0	0	0	0	0	0
chr3R-24605971	-1.55501	4.00394	-2.34984	-2.78578	0.463303	0	0	0	0	0	0	0	-0.770501	-0.085665	-0.49739	0
chr3L-11468998	-0.372218	-0.472291	0.005876	-0.033785	0.36255	0	0	0	0	0	0	0	0.677926	1.61818	0.881953	0.880734
chr2L-15439512	-0.0144683	-0.399519	-0.269824	-0.001987	0.390449	0	7	11	0	0	0	0	-0.35309	-0.905269	-0.992144	0.984496
chr3R-9612830	0.420453	-0.888951	-0.424393	-1.013	0.519789	2	0	1	2	3	0	0	0.021634	0.55859	0.7268	0
chr4-733558	0.613436	0.0200775	0.290066	0.153128	0.427313	2	9	9	1	2	0	0	0	0	0.333433	0.89011
chr2R-5409046	0.212635	1.02868	0.3925	0.094009	0.301802	0	0	1	0	0	0	0	0	0	0	0
chr2L-15315284	-0.47051	0.55835	-1.97811	-2.09284	0.485437	1	9	11	0	1	0	0	0	0	0	0.984496
chr3R-10268005	0.102173	-1.98984	0.636813	0.077417	0.475	1	0	0	0	0	0	0	0	0	0	0.894737
chr3R-6296478	-0.0395043	0.178638	-0.392336	-0.529985	0.464286	1	4	7	1	0	0	0	-0.627883	-0.728054	0.331908	0.787565
chr3R-17355056	0.102458	-0.621012	-0.2268	-0.2298	0.45	1	7	9	0	0	0	0	0	0	0	0
chr2R-4216275	-0.394321	-0.664033	-0.689573	-0.820377	0.404523	1	3	9	0	1	0	0	-0.165652	0.063634	-0.225724	0.789773
chr3R-21579317	-0.66119	-0.0594365	0.024332	-1.36762	0.465649	0	0	2	0	1	0	0	0	0	0	0.859259
chrX-21560826	0.601319	-1.6644	-1.97569	-3.57538	0.382222	0	0	0	0	0	0	0	0	0	0	0
chr3L-608207	0.99723	0.253547	0.309769	-0.750308	0.415385	1	0	0	1	0	0	1	0.190029	0.408511	0.627534	0
chr3L-22567174	-0.576165	-1.03261	-0.006372	0.312058	0.39823	0	2	7	0	0	0	0	-1.18213	-0.451731	-0.270983	0.915809
chr3R-26492155	-0.158837	-1.32685	-2.88273	-3.33978	0.409756	0	5	8	0	0	0	0	-0.027473	0.261543	0.093035	0.885549
chr2L-15392228	0.505798	-0.656017	0.631364	0.363971	0.550239	1	6	11	0	1	0	0	-0.568542	-0.980227	-1.08239	0.984496
chr3L-919820	-2.62966	4.92823	-3.6125	-4.07853	0.458716	0	0	4	0	0	0	0	-0.062154	0.419159	-0.032769	0.91236
chr3R-19325748	-0.693741	-2.00081	-1.84046	-2.25691	0.492908	0	0	5	0	0	0	0	0	0	0	0.893345
chr3L-18330197	-0.371611	1.60574	-0.498822	-0.111418	0.394231	0	7	10	0	0	0	0	-0.157474	0.180209	0.220108	0.939371
chr3L-15444835	-0.515837	2.54341	-0.371546	-0.354348	0.405797	0	0	1	0	0	0	0	0	0	0	0.86288
chr2R-17477122	0.206581	-0.415295	0.735866	-1.89193	0.405512	1	0	6	0	0	0	0	0	0	0	0.752212
chr3R-4972489	0.016333	-1.68618	0.314245	0.189837	0.481633	1	0	1	0	1	0	0	-0.884783	-0.823816	-0.431465	0
chr3R-26992718	-0.817653	1.34696	-1.55312	-1.2246	0.421525	0	0	1	0	0	0	0	0	0	0	0.903574
chr3R-16183032	0.179706	-2.05259	-1.29748	-1.37112	0.508621	1	0	1	0	0	0	0	-0.592531	-0.769709	-0.75942	0.819847
chr3R-25374313	0.191271	-1.71096	-0.580759	-0.727257	0.498054	1	9	9	1	4	2	0	-0.894341	-0.854095	-0.378234	0.71408
chr2R-10373432	0.80127	2.37212	-0.60645	-1.3737	0.38961	5	0	0	3	0	0	2	0.54209	-0.083567	0.526295	0
chr3L-4178535	-0.283679	2.56026	1.41417	1.39221	0.279245	0	0	0	0	0	0	0	-0.239221	0.066111	0.174564	0
chr3L-14817596	-0.0744337	0.838781	0.182463	-0.541158	0.46798	0	0	3	0	0	0	0	0	0	0	0.936416
chr3R-24791193	-0.392074	0.818936	0.112014	0.245317	0.470588	0	0	1	0	0	0	0	0	0	0	0.80177
chr3L-8499712	0.0425493	0.770925	-1.29977	-1.1942	0.415966	2	5	0	2	1	3	1	0	0	0	0
chr3R-12780127	-0.415665	1.18592	0.413317	-0.246875	0.399038	1	9	9	0	0	0	1	-0.599154	-0.143361	-0.16048	0
chr3L-11000135	0.22986	0.012876	0.463077	0.774744	0.490842	4	9	11	4	3	5	0	0	0	0	0.793834
chr3R-1713563	0.035302	-0.447	0.099093	0.391581	0.418605	0	0	0	0	0	0	0	-0.457391	-0.62314	-0.833414	0.879781
chr3L-14150146	-0.306807	-0.00354	0.078695	0.030265	0.402655	1	9	11	1	2	0	0	-0.709995	-0.337983	-0.375665	0.878405
chr3R-13971313	0.141412	0.469921	-0.763095	-1.35754	0.377778	0	6	6	0	0	0	0	-0.205723	-0.302426	0.167633	0
chr2R-7437761	-0.562681	-0.893854	-0.417104	-0.643667	0.483333	2	9	11	0	1	0	0	-0.620204	-0.745053	0.494218	0.773994
chr3L-12709175	-0.605992	0.615853	0.662295	-0.093614	0.313636	0	8	10	0	0	0	0	0.142345	0.059612	-0.013492	0
chr2L-1279626	-0.061656	0.978286	-0.452095	-0.21054	0.409524	0	0	2	0	0	0	0	-0.578073	-0.496177	-0.36687	0
chr3L-19413987	-0.0961173	0.128452	0.189841	0.390655	0.329365	0	0	0	0	0	0	0	0	0	0	0
chr2R-20369600	0.173326	-0.338492	-1.2039	-1.92947	0.475771	0	0	4	1	0	0	0	0	0	0	0.931148
chr3R-17520668	-0.101704	0.868008	-0.260354	-0.98031	0.49115	0	0	0	0	0	0	0	-0.091275	0.444925	0.399376	0.982143
chr3R-8975648	-0.0330473	0.710907	0.483873	0.005931	0.495098	0	0	0	0	0	0	0	-0.784816	-0.553716	-0.794003	0.914347
chr3L-15533758	-0.660844	0.817071	0.925879	-0.061297	0.430962	4	0	0	0	1	0	3	1.02828	0.402626	1.03285	0
chr3L-17167278	0.0652013	0.333464	0.2675	0.117182	0.39172	0	0	0	0	0	0	0	-0.764817	-1.07325	-0.8365	0.808765
chr3R-16249197	-0.726045	0.629282	0.05622	0.362129	0.397129	0	0	2	0	0	0	0	0	0	0	0.819847
chr2L-15968453	0.767346	-0.753641	0.321073	-0.263995	0.461957	0	0	1	0	0	0	0	0.181282	-0.075761	-1.21808	0.925602
chr3R-1809023	0.319128	-0.579116	-0.454296	-0.598574	0.476534	0	0	0	0	0	0	0	-0.527633	-0.605287	-0.867386	0.879781
chr3R-24776295	-1.67968	1.03938	-0.445	-0.61844	0.385321	0	0	1	0	0	0	0	0	0	0	0.80177
chr3L-17704919	-0.032523	-0.535619	-0.454182	-0.747897	0.369159	0	0	1	0	0	0	0	0.667031	1.23693	0.11945	0.746535
chr2R-4913451	-0.146005	1.23949	0.653594	0.786116	0.450893	0	0	5	0	0	0	0	-0.122286	-0.588025	-0.454161	0
chr3R-17766821	-0.725523	0.695919	1.9837	0.849289	0.558824	1	0	0	1	3	0	0	0	0	0	0.745763
chr3R-9404989	-0.184705	0.899212	-0.151823	-0.81931	0.53202	0	0	0	0	0	0	0	0	0	0	0
chr3L-5825076	-1.52041	-1.00911	-0.369009	-1.21638	0.483871	0	4	11	0	0	0	0	-0.387874	-0.864326	-0.428712	0
chr2R-18766380	0.193279	-0.0535795	-0.116925	0.622911	0.58216	0	3	2	1	0	0	0	-0.170586	-0.430377	-0.236067	0
chr3R-19283834	-0.362896	0.472683	0.266696	-0.180262	0.433566	0	0	5	0	0	0	0	-0.596878	-0.5325	-0.446417	0.893345
chr3R-19318851	-0.021199	-0.052196	0.763413	0.62703	0.494465	0	0	5	0	0	0	0	-0.670091	-0.475997	-0.503575	0.893345
chr3R-1751303	-0.0526403	-0.107663	0.033093	-0.384639	0.457045	0	0	0	0	0	0	0	-0.481499	-0.704423	-0.889171	0.879781
chr3R-11848251	0.0320083	-1.19025	3.4362	1.5677	0.5	1	9	9	0	3	2	0	1.52775	0.489246	1.27905	0
chr3R-25361150	-0.232554	0.268084	-1.38139	-2.3595	0.432836	1	9	9	0	0	0	0	-0.883484	-0.826299	-0.345623	0.71408
chrX-11836915	-0.51816	3.702	1.59224	1.76405	0.266968	0	0	0	0	0	0	0	1.12913	0.280809	0.483154	0.945619
chr3L-15847569	0.891864	-1.24353	-1.49726	-1.27678	0.486842	0	0	0	0	0	0	0	0	0	0	0.79402
chr3L-18381347	0.575313	-0.993057	0.004134	-0.843936	0.480198	1	8	10	0	0	0	0	0.309472	0.177389	0.552648	0.939371
chr3L-6441384	0.511646	-0.642841	-0.758333	0.015361	0.526104	0	7	5	0	0	0	0	-0.580579	-0.201373	-0.30106	0.839735
chr2L-21019812	0.110275	0.988532	-0.232339	-1.75784	0.513761	1	0	0	0	1	0	0	-0.523543	-0.31111	-0.389979	0.886555
chr2R-4227328	-0.276893	1.67069	0.50422	1.04432	0.32	0	1	7	0	0	0	0	-0.123209	0.007376	-0.311607	0.789773
chr3L-1076202	0.632154	0.274601	-0.149235	-0.326037	0.391156	0	0	5	0	0	0	0	-0.996177	0.408333	0.515738	0.803545
chrX-16061687	-0.0719	-0.403938	0.4052	0.859575	0.445	2	9	7	0	0	0	0	0	0	0	0.822006
chr3R-24339497	-0.217359	0.353758	-0.380359	-1.34761	0.473856	0	2	4	0	0	0	0	-0.687106	-0.534324	-0.445651	0.896552
chr2R-6454195	-1.01059	1.17605	1.27227	0.698691	0.398438	2	0	0	0	3	0	5	0	0	0	0
chr3R-9355389	-0.735095	-1.20173	1.30488	-0.665401	0.448113	0	0	0	0	0	0	0	0.109022	0.262507	-0.102978	0
chr3R-27362775	-0.738734	0.0057455	-0.331453	-0.170988	0.430233	0	0	1	0	0	0	0	-0.768938	-0.40828	-0.403109	0.991098
chr3R-24255844	-1.19457	0.0785545	-0.807279	-0.307181	0.431373	0	0	4	0	0	0	0	-0.545177	-0.504599	-0.836615	0.896552
chr2L-13749425	0.060037	0.265928	-1.00279	0.316912	0.430147	1	0	4	0	0	0	0	-0.619121	0.051998	-0.785987	0.894519
chr2R-10426167	-0.266061	1.4031	1.74171	-0.566736	0.495868	0	0	0	0	0	0	0	0	0	0	0
chr3R-6264534	-0.569849	-1.70775	-0.300619	0.130119	0.552381	2	0	7	0	0	0	0	-0.164947	-0.359944	0.234572	0
chr3L-6271785	0.144668	0.273167	0.282919	-0.159434	0.479638	0	0	3	0	0	0	1	-0.272878	0.315712	0.272335	0.839735
chr3R-27146318	-0.270537	0.125596	0.215841	0.461285	0.378505	1	0	2	1	0	0	0	-0.205518	-0.085319	0.423222	0.859719
chr2L-4571578	-0.67549	-0.073959	-0.386673	0.121816	0.408163	1	1	1	0	1	0	0	-0.683071	-0.995945	-0.827085	0.90642
chr3R-20293296	0.304665	-0.251681	-0.93179	-1.07443	0.480349	0	0	0	0	0	0	0	-0.589234	-0.376125	-0.702493	0
chr3R-23946660	-0.181756	0.516205	0.330469	0.063951	0.392857	0	0	0	0	0	0	0	-0.588407	-0.445975	-0.894316	0.896197
chr3R-9265645	0.0526297	0.282382	0.460797	0.366272	0.431034	1	0	0	0	0	0	0	-0.163775	0.09962	-0.390607	0
chr2R-17474931	0.396184	0.944944	0.276372	-0.208177	0.545113	0	0	6	0	0	0	0	0	0	0	0.752212
chr2L-13647755	-0.0669007	-2.2376	-1.27906	-0.838728	0.469298	0	0	0	0	0	0	0	0	0	0	0
chr3R-21923409	-0.642833	-0.842691	0.229286	-0.903881	0.419048	1	6	9	0	1	0	0	0	0	0	0
chr3L-3151815	-0.040937	0.420009	-0.074698	0.141566	0.358491	0	0	0	0	0	0	0	0.087679	-0.059915	0.217443	0
chr3R-18281766	-0.506142	0.985746	0.508403	0.116534	0.386555	1	2	2	0	0	0	0	0	0	0	0
chr3R-24017763	-1.96406	-0.278961	0.362218	-1.90477	0.454225	0	0	0	0	0	0	0	0	0	0	0.896197
chr3L-10813148	-0.417157	1.54439	0.175368	-0.227391	0.391304	0	0	0	0	1	0	0	1.08408	1.81986	1.54602	0.766571
chr3R-24226805	-0.486533	0.284104	0.406439	-0.094835	0.377358	0	0	3	0	0	0	0	-0.441458	-0.369561	-0.790248	0.896552
chr3L-15536263	0.0472603	0.660434	0.360342	0.516438	0.360731	0	0	0	0	1	0	0	0.940317	0.385457	1.0041	0
chr3L-6331253	-0.125103	0.238119	0.33369	0.574381	0.404762	1	1	4	1	3	0	0	-0.583182	-0.244886	-0.256913	0.839735
chr2L-14581100	-0.526702	3.38966	3.42064	0.615574	0.421277	0	5	11	0	2	0	0	0	0	0	0.928903
chr3L-19099012	-0.673076	0.601673	0.154185	0.552318	0.283262	0	0	0	0	0	0	0	0	0	0	0
chr3R-17300463	-0.168079	-0.488115	2.00059	-1.0247	0.497537	1	9	9	0	1	2	0	0	0	0	0
chr2R-15723021	0.070529	0.260095	-0.432441	-2.10763	0.393365	0	0	9	0	1	0	0	0.184092	-0.272891	0.286866	0.865994
chr2R-16093269	0.025876	0.439953	0.171953	0.390884	0.404651	0	0	6	0	0	0	0	0.11946	0.437399	1.03952	0.865994
chr3R-4915000	0.221689	0.469629	0.638875	0.29346	0.50519	0	0	0	0	0	0	0	-0.342303	-0.309863	-0.42786	0
chr2R-1569068	-0.537024	-0.122565	-0.319741	0.24687	0.396296	1	4	0	0	3	0	0	0	0	0	0
chr2R-5203953	-0.483128	0.341847	0.60734	-0.973522	0.44335	0	6	1	0	0	0	0	0.175447	0.141614	-0.307036	0
chr3R-25395073	0.101686	0.094231	0.273712	0.393865	0.492308	1	9	9	0	0	0	0	-0.741518	-0.833498	-0.381968	0.71408
chr2L-4649102	-0.495095	0.450742	0.018954	0.444068	0.479087	0	0	1	0	0	0	0	0	0	0	0.90642
chr3L-5412785	0.0995203	0.784041	0.453134	-2.24991	0.476027	0	0	2	0	0	0	0	0	0	0	0
chr2R-7615581	0.296359	-0.843811	-0.935947	-0.76517	0.383495	0	2	8	0	0	0	0	0.883303	0.528738	0.629085	0.867841
chr2L-5260440	0.261991	-0.342176	0.285954	0.862233	0.458015	0	0	0	0	0	0	0	0	0	0	0.889813
chr2L-15363668	0.190362	-2.32837	-0.796498	-0.875362	0.454106	1	5	11	0	0	0	0	0	0	0	0.984496
chr3R-20509159	-0.526238	-0.300245	-0.471873	-0.19544	0.355049	0	0	0	0	0	0	0	-0.338846	-0.599404	-0.63932	0
chr3L-11361443	0.125045	-0.905236	-0.492623	-1.37256	0.457399	3	0	0	1	1	0	1	1.44907	1.97254	1.80202	0
chr2R-19824083	-1.07931	0.834862	-2.75176	-2.84322	0.448529	1	0	0	0	0	0	1	0.308027	0.553486	0.565827	0
chrX-18185177	-0.00358133	-0.166266	0.05466	0.026277	0.52766	1	9	7	0	2	1	0	0	0	0	0.781609
chr2L-3592600	0.0264833	-0.83108	-1.58551	-0.625353	0.412429	1	9	11	1	0	0	0	-0.210944	-0.263573	-0.239763	0.917073
chr3R-23049174	-0.42882	0.395915	0.010718	-0.270545	0.415842	0	0	5	0	0	0	0	0.553113	0.658337	0.384346	0.875862
chr3R-24277803	-0.16687	0.211054	-0.068799	-0.474331	0.374016	0	0	4	0	0	0	0	-0.674474	-0.612152	-0.825712	0.896552
chr3L-13338722	-0.3994	-0.87615	-0.873325	-0.4329	0.47	0	0	4	0	0	0	0	0.61561	0.588784	-0.752606	0.82249
chr3R-2717817	0.242277	-0.265507	0.544605	0.231224	0.418421	1	9	9	0	1	0	0	-1.11352	-1.22275	-0.888914	0
chr3L-12560976	0.376453	-1.9236	-0.188013	1.29152	0.401709	1	6	8	0	1	0	0	-0.451033	-0.629639	-0.18389	0
chr3L-13550223	-0.630174	1.26433	1.00724	0.438152	0.5	0	3	2	0	0	0	0	-0.80312	-0.584485	-1.00703	0.8027
chr3R-21031227	-0.560907	0.194676	0.760921	-0.340272	0.435146	3	0	1	2	4	1	1	0.0912	0.094429	0.023912	0
chr3R-25172814	0.0371113	-0.058144	-0.046	-0.196644	0.342222	0	0	0	0	0	0	0	-0.232108	-0.220938	0.396747	0.868307
chr3R-22222120	-0.572068	-0.866348	0.882718	-1.43365	0.497925	0	0	0	0	0	0	0	-0.315295	0.208352	-0.382046	0.931608
chr3R-10823439	0.067067	0.0768735	0.271237	0.588902	0.397213	0	0	0	0	0	0	0	-0.765919	-0.400604	-0.806701	0
chr2R-10964868	-0.485653	0.252155	-0.539692	-0.353442	0.373188	0	0	3	0	0	0	0	-0.573865	-0.064489	0.289401	0.777293
chr3R-21895522	-0.159648	0.546385	-1.84688	-0.777324	0.474178	0	0	3	0	0	0	0	0.556204	1.33544	0.713946	0
chr2R-10193335	0.568989	-0.26797	0.17235	0.626859	0.435897	0	0	0	0	2	0	0	1.25373	0.922281	0.6595	0
chr3R-20512143	-0.401341	0.630943	-0.315083	-0.281275	0.278146	0	0	0	0	0	0	0	-0.343873	-0.606496	-0.644683	0
chr3L-14355766	-0.822679	2.42218	1.32218	0.732847	0.349282	0	0	1	0	1	0	0	-0.121489	0.054035	0.227661	0.878405
chr2L-19223260	0.572925	-2.30285	-0.338906	0.747575	0.55794	1	5	10	3	1	0	1	0	0	0	0.875256
chr2L-14476872	-0.997236	1.0369	-0.793333	-1.83487	0.42735	0	7	11	0	1	0	0	-0.641438	-0.494278	1.35109	0
chr3L-14880561	-0.515619	0.13126	-0.93416	-1.14813	0.453125	0	0	0	0	0	0	0	0	0	0	0.936416
chr3R-12732780	-0.69007	-1.46452	-1.31103	-1.23227	0.481308	1	9	9	0	1	0	0	-1.18214	-0.958249	-0.748728	0
chr3L-19433306	0.0218883	-0.688627	-0.739936	-0.149742	0.493562	0	0	0	0	0	0	0	0	0	0	0
chr2R-20609935	-0.515787	-0.532467	-0.502246	-0.270492	0.432787	0	0	2	0	0	0	0	-0.466222	-0.176891	-0.154618	0.813084
chr3L-5859024	0.131994	-1.36822	-0.397525	-1.68326	0.519608	1	9	11	0	0	0	0	-0.533865	-0.924516	-0.236418	0
chr3R-6744850	-0.166508	-0.438393	0.029143	-0.303524	0.471429	0	0	0	0	0	0	0	-0.817638	-0.7325	-0.965625	0
chr3R-21899568	-0.35683	0.514439	0.103204	-0.432531	0.453061	0	0	6	0	0	0	0	0.63259	1.34234	0.649848	0
chr3L-3998197	-0.0813797	-0.854395	-0.438512	-0.715791	0.539535	0	0	6	0	0	0	0	-0.281966	-0.338889	-0.303914	0
chr3L-21593981	0.237906	0.10797	-0.649722	-1.04278	0.457265	1	9	9	0	0	0	0	0	0	0	0
chr3R-21825106	0.730959	-2.64778	1.1523	0.934311	0.545455	2	3	6	3	3	2	1	0.592069	1.33782	1.27615	0
chr2L-12907458	-0.362891	-0.134702	0.135519	0.611423	0.446154	0	0	0	0	0	0	0	0	0	0	0.799414
chr3R-24057010	0.162241	1.00107	-1.47397	-1.42124	0.435407	0	0	0	0	0	0	0	-0.507533	-0.227118	-0.998907	0.896197
chr2L-1455890	-0.10995	-2.91573	-0.892065	-1.13045	0.497512	0	3	6	1	0	0	0	0	0	0	0
chr3R-6407258	-0.161548	2.43042	0.463333	1.21204	0.213483	0	1	6	0	0	0	0	0	0	0	0
chr2L-18907219	0.831808	-2.31939	-1.01937	-2.33473	0.55	1	9	11	1	1	0	0	0.094429	-0.454437	0.05014	0
chr3L-20694951	0.20799	-1.03936	-0.348775	-0.540319	0.45098	1	9	9	1	0	0	0	-0.413935	-0.380198	-0.319599	0.889051
chrX-21574075	0.316504	-2.11214	-1.67518	-3.20508	0.340326	0	0	0	0	0	0	0	0	0	0	0
chr3L-9038781	-0.277119	-0.841177	0.00432	0.106553	0.466019	1	3	5	0	2	0	0	0	0	0	0
chr2L-11241362	-0.573783	-0.115047	0.425365	-0.315159	0.396825	0	0	2	0	0	0	0	0	0	0	0
chr3R-10955002	-0.788362	-0.0437935	1.62121	0.344583	0.469298	1	0	0	1	2	0	0	0	0	0	0
chr3L-10382563	0.0186113	-1.73076	-0.759452	-0.637381	0.414286	1	1	4	0	2	0	0	0	0	0	0.916817
chr3R-21865533	-0.774458	0.0546945	3.97439	0.047762	0.475524	1	2	2	1	3	1	1	0	0	0	0
chr3R-19103303	-0.0541383	-0.269873	-0.013453	-0.29786	0.38983	1	2	4	0	0	0	0	0	0	0	0
chr3R-9738316	-0.190923	0.0787555	-1.79297	-1.31572	0.386454	1	9	9	0	0	0	0	0	0	0	0
chr3L-22651145	-0.281173	-1.22916	0.31537	0.814444	0.388889	0	4	7	0	0	0	0	-1.17719	-0.017553	-0.229174	0.915809
chr2L-7301098	-0.75178	-0.804745	-0.704199	1.17709	0.436893	1	9	11	0	4	0	0	0.732543	0.582955	0.558143	0
chr3L-17561669	-1.11138	-0.875108	2.17114	1.94771	0.454106	1	0	0	0	1	0	1	0.416292	0.359854	1.03805	0
chr3R-14322570	-0.062953	0.883425	-0.100466	-0.535209	0.562701	0	0	0	1	0	0	0	0.458583	0.590127	0.391052	0
chr3R-19302519	0.0381037	-1.30466	-0.554331	-0.767165	0.452756	0	0	5	0	0	0	0	-0.631632	-0.532884	-0.481263	0.893345
chr3L-15476973	-0.663588	-0.080698	-0.682365	-1.67029	0.468468	0	0	0	0	0	0	0	0	0	0	0.86288
chr3L-1066710	0.48781	0.54426	0.18958	0.098296	0.393805	0	0	5	0	0	0	0	0	0	0	0.803545
chr3L-20575295	0.40642	-0.52213	0.805648	-1.11667	0.509259	1	0	6	0	0	0	0	-0.674237	-0.546179	-0.10586	0.889051
chr3R-6379515	-0.359507	-0.0242605	-0.310211	-0.461667	0.450704	1	2	6	0	1	0	0	-0.714549	-0.143998	-0.115283	0
chr2R-18845516	0.231706	-1.15152	-1.28493	-1.26358	0.464164	0	0	4	0	0	0	0	-0.370051	-0.435541	-0.087954	0.851735
chr3R-19317261	-0.84493	0.12358	-1.67214	-2.2184	0.389671	0	0	5	0	0	0	0	0	0	0	0.893345
chr3R-20797746	0.335974	-1.96741	0.660685	-0.237032	0.497717	0	0	3	0	0	0	0	0	0	0	0.751553
chr3L-13563461	-0.888058	1.05312	-0.343527	-0.094442	0.424107	0	5	2	0	0	0	0	-0.871582	-0.601761	-0.972935	0.8027
chr2L-5511527	-1.08403	-0.241998	-0.40705	0.205481	0.439331	1	5	8	0	0	0	0	0	0	0	0
chr2R-10337109	-0.421116	-1.26744	-0.795436	-0.860482	0.555046	1	9	11	0	1	2	0	0.193342	0.137369	0.341328	0
chr2R-12236652	-0.470304	-0.757266	-0.821601	-0.19436	0.44335	0	0	1	0	0	0	0	0	0	0	0
chrX-21572929	0.56853	-1.83236	-2.16315	-4.04773	0.400452	0	0	0	0	0	0	0	0	0	0	0
chr3R-13619635	-0.380376	0.417829	0.879742	1.16972	0.450704	4	0	0	1	3	3	0	0	0	0	0
chr3R-24721791	-0.00386233	-0.877169	0.502133	0.871517	0.488152	0	0	0	0	0	0	0	0	0	0	0.80177
chr3R-1695459	-0.595714	-0.871274	-0.270214	-0.301048	0.328571	0	0	0	0	0	0	0	0	0	0	0
chr3R-18974623	-0.414027	-1.49714	0.116644	-1.08616	0.532407	1	4	6	0	3	2	0	0	0	0	0
chr3L-3252699	-0.447811	-0.290418	0.124163	0.744893	0.459227	0	0	0	0	1	0	1	1.32626	0.902676	1.36789	0.876652
chr3R-9769801	-0.201629	-1.21832	0.557534	0.064502	0.41629	1	7	7	0	0	0	0	-0.716883	-0.444275	-0.064726	0
chr3L-14126653	0.041988	-0.962168	-0.2275	0.074885	0.394495	1	9	11	1	3	0	0	-0.730846	-0.195797	-0.355575	0.878405
chr2R-9514278	-1.9455	1.64135	0.122347	0.551088	0.435115	0	0	4	0	0	0	0	-0.279523	-0.04504	-0.547371	0
chr3L-12594410	0.415741	-1.22109	0.386135	-0.641135	0.425121	1	9	11	0	1	0	0	0	0	0	0
chr3R-9327458	0.545302	-0.240553	-1.62553	0.800288	0.442478	0	0	0	0	0	0	0	-0.231623	-0.132586	-0.40005	0
chr3R-22259478	0.0395573	0.072561	-1.04052	-1.35044	0.472028	0	0	0	0	0	0	0	0.260049	0.425671	-0.030556	0.931608
chr3R-24230783	-0.547545	-0.486853	-0.122388	0.163862	0.508929	0	0	3	0	0	0	0	-0.393611	-0.364454	-0.784844	0.896552
chr3R-24390338	0.17569	-2.11949	0.015835	1.64528	0.501285	1	9	9	0	2	0	0	-0.28177	-0.258671	-0.267768	0
chr3R-15113316	0.21487	-1.46943	0.260024	-0.031335	0.485437	0	0	0	0	1	0	0	0	0	0	0.859425
chr3R-9335592	-0.40408	-1.4183	-0.987712	-0.963892	0.495283	0	0	0	0	0	0	0	-0.235434	-0.077988	-0.383642	0
chr3L-10294589	-0.236111	-0.538924	-0.018935	-0.791366	0.453704	0	7	9	0	1	0	0	0	0	0	0
chr3L-3667897	0.31175	-0.244778	0.702722	0.50274	0.437722	0	3	10	0	0	0	0	0.180706	0.001193	-0.402112	0.939394
chr3R-27525556	-0.114598	-2.02302	2.99171	-1.63546	0.472727	0	0	0	1	3	0	0	0.468596	0.409917	1.09779	0.815094
chr2R-4118593	0.41139	-0.572266	-0.351298	-0.680934	0.415225	0	1	0	2	2	2	0	0.510544	0.526171	0.842585	0
chr2L-7298987	-0.496252	-1.55169	-2.61262	0.154444	0.426667	1	9	11	0	1	0	0	0	0	0	0
chr2R-11635186	-0.261518	-0.403523	0.272355	-0.165058	0.3861	3	0	0	0	2	0	0	0	0	0	0.750958
chr3L-5393001	-0.120345	1.37714	-0.171798	-0.866963	0.421488	0	0	1	0	0	0	0	0	0	0	0
chr2L-14453242	0.336825	-1.20942	-3.08524	-2.11442	0.443966	1	6	11	0	2	0	0	0	0	0	0.897567
chr3R-4109004	0.631342	0.252859	-0.14375	-0.627639	0.449074	1	9	9	0	0	0	0	0	0	0	0
chr3R-8941778	-0.594925	0.365721	-0.492886	-0.253293	0.471545	0	0	0	0	0	0	0	-0.947955	-0.845492	-0.750807	0.914347
chr2L-21928822	-0.162932	0.841971	-0.191846	-0.373029	0.394191	0	7	8	0	0	0	0	-0.421746	-0.65849	0.207025	0
chr3L-13606737	-0.277301	-0.681513	-0.130046	0.434954	0.481651	0	0	2	0	0	0	0	0	0	0	0.8027
chr3L-20930741	0.566438	-1.07446	-0.2975	0.762289	0.457746	0	5	5	0	0	0	0	0	0	0	0.957447
chr3L-5845348	1.26617	0.285675	0.057198	-1.00744	0.46371	1	9	11	0	0	0	0	-0.387692	-0.993311	-0.254937	0
chr3L-20582095	0.245592	-0.443612	0.307551	0.115265	0.542857	1	0	6	1	0	0	0	-0.678389	-0.567003	-0.118774	0.889051
chr3L-3387730	5.56667e-05	-0.495502	0.646468	-1.10126	0.349442	1	0	0	0	0	0	0	1.34618	1.21435	1.38495	0
chr3R-3754659	0.064262	0.105119	-1.3545	-1.11821	0.471429	0	5	5	0	0	0	0	0	0	0	0
chr3L-13093029	-0.458444	-0.706951	-0.458412	-0.705	0.486275	0	4	9	0	0	0	0	-0.531281	-0.222515	-0.618935	0.82249
chr3R-19259997	-0.754795	0.531096	0.069901	-0.318892	0.428571	0	0	5	0	0	0	0	0	0	0	0.893345
chrX-7478595	0.0161803	1.04147	0.515436	0.192576	0.344697	0	8	7	0	0	0	0	1.44023	1.27391	1.60695	0.88984
chr2R-20713906	0.0252873	-0.772165	-0.317095	-0.29294	0.429577	1	9	11	0	0	0	0	-0.493886	-0.378352	-0.400039	0.87451
chr3R-24316296	-0.11763	-1.47644	-0.514467	-0.922623	0.47541	0	1	4	0	0	0	0	-0.860287	-0.592843	-0.669348	0.896552
chr3R-14881880	-0.498136	-1.06359	0.415568	-0.639205	0.495455	2	0	0	0	1	0	0	0	0	0	0.837838
chr2R-9256552	0.160346	-1.5298	-0.181463	-1.00747	0.472789	0	0	5	0	0	0	0	0.153131	0.641657	0.26506	0
chr3L-6655263	-0.515592	1.82534	-1.97715	-1.18902	0.37	0	0	1	0	0	0	0	-0.252389	-0.610556	-0.443935	0.779264
chr3L-4451514	-0.375197	0.728297	-0.297402	0.069847	0.375546	0	0	0	0	0	0	0	0	0	0	0.804281
chr3R-26989870	-0.763075	-0.122162	-0.308775	-1.73	0.43	0	0	1	0	0	0	0	-0.515417	-0.524967	-0.233861	0.903574
chr3R-21909353	-0.105225	-0.145404	-0.470087	-0.986572	0.41048	0	7	8	0	0	0	0	0	0	0	0
chr3L-14159859	-0.280605	-0.387901	-1.59526	-1.1163	0.45283	1	9	11	0	1	0	0	0	0	0	0.878405
chr3R-23942101	-0.328427	-0.67469	0.14624	-0.24	0.444	0	0	0	0	0	0	0	-0.611478	-0.460459	-0.897023	0.896197
chr3R-7113362	-1.4792	2.45737	-0.637386	-0.290095	0.443182	1	9	9	0	0	0	0	-0.574203	-0.583765	-0.667658	0
chr2R-13168928	0.524869	-0.127488	0.253162	-0.19049	0.480392	1	0	0	0	0	0	0	-0.100673	0.231288	-0.19128	0.850178
chr3L-14165197	0.210387	-0.788738	-0.527432	-0.751591	0.536364	2	9	11	1	2	1	0	-0.663016	-0.301311	-0.342264	0.878405
chr3L-662026	-0.470351	1.12358	0.348145	-1.12964	0.483636	0	0	3	0	0	0	0	0.643619	0.921126	1.00086	0
chr3R-27549284	-0.570633	1.32383	2.01279	2.29397	0.4375	4	0	0	4	5	1	2	0	0	0	0
chr3L-16021541	1.18225	-1.52481	0.049027	-0.562081	0.375566	0	0	6	0	3	0	0	0	0	0	0
chr2L-13158287	-0.127956	-0.563497	-0.116108	-0.331453	0.482759	0	0	0	0	0	0	0	0	0	0	0
chr3R-6482549	-0.151773	-0.78976	-1.42403	-1.5882	0.43131	2	9	9	1	1	0	0	-1.06196	-0.562501	0.919377	0.745098
chr3L-5831281	0.603519	-0.261751	-0.277666	-0.434791	0.494774	0	6	11	0	0	0	0	-0.392939	-0.901158	-0.369213	0
chr3R-26546576	-0.716631	0.991045	-2.11237	-2.84422	0.387931	1	6	8	0	0	0	0	1.24431	1.10072	1.14407	0.885549
chr3R-16627149	0.0921223	2.41577	0.98509	0.959036	0.264574	0	0	0	0	0	0	0	-0.26803	0.183245	-0.199908	0
chr2R-16254435	-0.177538	0.140013	0.080995	0.110697	0.358209	0	2	0	0	1	0	0	-0.888674	-0.363266	-0.647015	0.828125
chr2R-4239139	-0.0856877	0.289712	-0.076925	-1.2	0.396825	0	1	7	0	0	0	0	0	0	0	0.789773
chr2L-6824042	-0.470757	0.588986	-0.423309	-0.572609	0.458937	1	9	11	0	0	0	0	-0.613539	-0.320831	0.124611	0
chr2L-15184707	-0.572716	1.52436	-0.615671	-0.230995	0.398148	0	0	4	0	0	0	0	0	0	0	0.924675
chr2L-5226914	0.298282	-0.711151	0.776667	0.462632	0.47807	4	0	0	3	1	0	2	0.346835	0.041461	0.85032	0.889813
chr3L-390013	-0.315131	0.301692	-0.951225	1.97853	0.465686	1	9	11	0	0	0	0	0.269908	-0.436456	-0.38051	0.808092
chr2R-15741165	-0.256636	0.372455	0.361477	-0.789205	0.413636	0	0	9	0	1	0	0	0.517465	-0.284807	0.486869	0.865994
chr3R-26578512	0.319665	0.494311	0.078294	-0.796939	0.429907	0	8	9	0	0	0	0	1.81138	1.2614	1.45537	0.885549
chr3R-6883421	-0.837189	-0.294266	0.312388	-1.26848	0.432836	0	0	0	0	0	0	0	0	0	0	0
chr3L-14477164	-0.175844	-0.417266	0.199355	-0.139242	0.46129	0	1	1	0	0	0	0	0	0	0	0.878405
chr2L-12883938	0.376041	-1.14152	0.171927	0.299732	0.443902	0	0	1	0	0	0	0	0	0	0	0.799414
chr3R-3260781	-1.12149	0.341341	-0.289421	-0.814485	0.433476	0	0	0	0	0	0	0	0	0	0	0.841941
chr3R-19288470	-0.313499	-0.452717	0.256494	-0.043203	0.471861	0	0	5	0	0	0	0	-0.589924	-0.534012	-0.448664	0.893345
chr3R-12355009	-0.182633	-1.13405	-1.01335	-0.74658	0.419811	0	0	7	0	0	0	0	-0.548662	-0.468871	-0.427103	0.757576
chr3R-9455118	0.320357	1.22623	-0.464055	-0.826493	0.482587	0	0	0	0	0	0	0	0	0	0	0
chr3R-10212407	-1.29008	4.04058	-3.10304	-1.71618	0.395349	0	0	4	0	1	0	0	0	0	0	0
chr2L-14299170	0.0172943	-0.0918525	-0.011478	0.23666	0.392713	0	0	4	0	1	0	0	-0.355294	-0.203379	0.211672	0.965225
chr3R-24183626	-0.557325	0.190535	-0.053004	0.127716	0.407407	0	0	3	0	0	0	0	-0.731656	-0.531195	-0.712439	0.896552
chr3R-9318125	-0.19356	-0.473127	0.589681	-0.767489	0.451064	0	0	0	0	0	0	0	-0.14914	-0.161137	-0.361943	0
chr3R-858794	-0.592159	-0.427694	0.251773	0.180409	0.45	1	0	0	2	1	0	0	0.670867	-0.130866	1.62625	0.814469
chr3R-13452105	-0.250333	1.23895	0.804071	0.332095	0.457143	0	0	2	0	0	0	0	0	0	0	0
chr2R-18931540	0.532768	-0.610928	-1.21984	-1.77127	0.429864	1	9	10	0	0	0	0	0	0	0	0.851735
chr3L-12928347	-0.301008	0.263387	0.0254	0.02155	0.395	0	0	0	0	0	0	0	-0.269051	-0.161116	-0.667193	0.765193
chr2R-16104433	-0.013404	2.29757	-1.78624	-1.75601	0.460094	0	0	5	0	0	0	0	0	0	0	0.865994
chr3L-5878061	-0.249407	-0.39989	-1.2217	-0.263773	0.494505	1	8	11	0	0	0	0	0	0	0	0
chr3L-12592608	0.671816	-1.92008	-0.499576	-0.699621	0.459821	1	9	11	0	0	1	0	-0.220388	-0.605434	-0.098491	0
chr3R-12067038	-2.23957	2.49184	0.229408	0.969676	0.492366	7	0	0	5	0	0	4	0	0	0	0
chr3L-6388580	0.000578333	-1.09113	-0.177489	-0.298014	0.378995	0	1	4	0	0	0	0	0	0	0	0.839735
chrX-4806185	-0.463989	2.39659	0.794716	0.708057	0.366812	0	0	0	0	0	0	1	-0.469762	-0.616043	-0.136912	0
chr3L-10764489	-0.200691	1.6815	1.0071	0.858548	0.357143	3	0	0	2	2	0	0	1.56134	1.77826	1.69166	0.766571
chr3L-4919441	-0.140601	0.368565	0.617152	0.730261	0.478261	0	0	2	0	0	0	0	0.052072	-0.075931	-0.574124	0.930576
chr2L-11872943	0.0419853	-0.816219	-0.326829	-0.761728	0.479675	0	0	1	0	0	0	0	0	0	0	0.783333
chr2L-5500276	-0.020426	-0.866941	-0.431324	-0.593425	0.506849	1	7	9	0	1	2	0	0	0	0	0.751304
chr3L-4869574	-0.656005	1.85149	-0.649877	-0.472353	0.416667	0	0	7	0	0	0	0	0	0	0	0.930576
chr3L-6434839	0.301545	-1.49849	-0.160365	-0.469313	0.454936	0	8	3	0	0	0	0	-0.558788	-0.169344	-0.26851	0.839735
chr3R-9799587	0.371594	-0.084836	0.855219	0.371861	0.379562	1	0	0	0	0	0	0	-0.590168	-0.464456	0.143261	0
chrX-21342909	-0.478297	-0.82704	-0.1581	-1.50913	0.327103	0	3	3	0	0	0	0	0	0	0	0.756892
chr3R-23978195	-0.765	1.18707	-0.172595	-0.429873	0.417722	0	0	0	0	0	0	0	-0.553213	-0.436535	-0.896067	0.896197
chrX-2932665	0.500844	0.848011	-1.08447	-0.799041	0.461224	0	0	0	0	0	0	0	0.7901	0.949456	1.82432	0.820652
chr3R-19280454	-0.0660077	0.910805	-0.199488	-0.197415	0.35122	1	0	5	0	0	0	0	0	0	0	0.893345
chr3R-24386560	0.0937247	0.730891	-0.993279	-1.98741	0.445344	1	9	9	0	2	0	0	-0.321003	-0.306612	-0.262663	0
chr2L-15415820	-0.430607	-0.968924	-1.3738	-1.18407	0.403101	0	6	11	0	0	0	0	0	0	0	0.984496
chr3L-19158379	-0.460731	0.140082	0.267146	-1.14422	0.400943	5	0	0	4	4	2	0	0	0	0	0.736986
chr3R-24804521	-0.038197	0.544435	0.04726	-0.965192	0.432692	0	0	1	0	0	0	0	0	0	0	0.80177
chr3L-22434519	0.198078	-1.27962	0.481436	0.326291	0.461818	0	1	7	0	0	0	0	-1.0944	0.472391	1.19607	0.915809
chr3R-9737896	0.223525	-0.6578	-1.2925	-0.751725	0.44	1	9	9	0	0	0	0	-0.784242	-0.594631	-0.215461	0
chr3L-13092229	-1.73576	0.25663	0.097612	-0.085597	0.517413	1	4	9	0	1	0	0	-0.538702	-0.224936	-0.622585	0.82249
chr3R-9387725	-0.377078	-1.77165	-1.98483	-1.33958	0.463054	0	0	0	0	0	0	0	0.022915	0.826814	-0.008095	0
chr3L-22092212	-0.220884	-2.39242	-0.829332	-1.68507	0.512931	0	0	2	1	0	0	0	-0.435681	-0.094004	0.294795	0.776938
chr3R-22325522	0.25681	-0.659303	0.082957	-0.46738	0.423077	2	0	0	1	0	0	0	-1.20184	-0.912226	-0.77619	0.906542
chr3R-12892554	0.129589	-0.450468	1.02938	0.976553	0.584475	1	0	0	2	2	0	2	0.220588	0.243054	0.172428	0
chrX-7481467	-0.248756	0.946549	0.692902	1.07917	0.4	0	7	7	0	0	0	0	1.50174	1.24534	1.59192	0.88984
chr3L-2136396	-0.0688887	0.117349	-0.219078	-0.16789	0.41844	0	0	0	0	0	0	0	0	0	0	0.902267
chrX-14246289	0.211048	-0.583086	-0.349258	-0.440449	0.476562	0	0	0	0	0	0	0	-0.534859	-1.14772	-0.467203	0.866513
chr3R-20732662	0.019164	-1.08224	-0.330533	-0.279914	0.560137	0	0	0	0	0	0	0	0.068399	-0.344617	-0.414421	0
chrX-7443203	-0.217061	0.984949	0.592675	0.366842	0.391813	0	8	7	0	0	0	0	0.929025	1.53514	1.71433	0.88984
chrX-16030218	-0.503644	0.324977	0.546186	0.262628	0.4	1	9	6	0	0	0	0	0.563313	0.222596	0.508193	0.822006
chr3L-4620133	0.385286	-1.43421	1.29265	-1.95263	0.511628	0	0	0	0	0	0	0	-0.720519	-0.479705	-0.905754	0
chr3R-6645852	-0.62084	-0.786058	-0.263485	-0.731004	0.485401	0	0	0	0	0	0	0	0.157507	-0.00638	-0.024506	0
chr3L-18706592	0.314238	-1.39706	-2.22923	-2.66204	0.352134	0	0	2	0	0	0	0	0	0	0	0.705263
chr3R-8587228	-0.0376713	1.67751	-0.523636	-0.256124	0.416268	0	0	1	0	0	0	0	0	0	0	0.850508
chr3L-20655279	0.0747063	-1.1286	-1.73535	-1.55628	0.38326	0	9	9	0	0	0	0	-0.539808	-0.4766	-0.308481	0.889051
chr2R-15737284	-0.125748	2.14193	0.782578	0.678111	0.351111	0	0	9	0	0	0	0	0	0	0	0.865994
chr3L-3995253	0.031623	-0.371382	-0.391382	-0.676645	0.434211	0	0	3	0	0	0	0	-0.302702	-0.368033	-0.340707	0
chr2R-20717670	0.193783	-0.651228	0.014754	-0.177386	0.431579	1	9	11	0	0	0	0	0	0	0	0.87451
chr3L-15756838	0.301727	-0.295293	0.308528	0.341714	0.379032	1	1	8	0	1	0	0	-0.058742	0.510407	1.55138	0.936449
chr2L-18759984	0.913875	-1.84176	-0.089778	-1.29165	0.527094	1	9	11	0	0	0	0	0	0	0	0.78836
chr3L-10399002	-0.490623	2.20647	-2.00558	0.36729	0.453271	0	1	4	0	0	0	0	0	0	0	0.916817
chr3R-9376046	-0.0356767	0.339967	0.097817	0.316463	0.379913	0	0	0	0	1	0	0	0.311376	0.629939	0.144159	0
chr2L-15397311	-0.378837	-0.646185	-0.333419	0.073837	0.4	0	6	11	0	0	0	0	-0.555372	-0.974365	-1.0588	0.984496
chr3R-7941989	-0.326151	-1.54717	1.08628	0.473053	0.424779	0	0	3	0	0	0	0	0	0	0	0
chr2L-15368292	-0.0239	-0.092808	0.354064	0.867217	0.433498	0	5	11	0	0	0	0	0	0	0	0.984496
chr3R-18975034	-0.577487	0.492212	-0.836925	-0.977976	0.472222	0	1	5	0	0	0	1	0	0	0	0
chrX-13815429	0.694472	-0.468518	-0.709864	-1.69609	0.484163	0	0	2	0	0	0	0	0	0	0	0
chr3R-27305416	-0.491535	-1.55766	-1.19245	0.952153	0.445545	0	0	0	0	0	0	0	0	0	0	0.991098
chr2L-20574494	0.36356	-2.61755	-1.52777	0.431321	0.475472	0	0	1	1	0	0	0	0	0	0	0.906191
chr3L-740795	0.0901417	-0.357594	0.42309	-0.387665	0.40566	2	0	3	3	2	0	0	0.750177	1.62794	1.71415	0
chr3R-24533009	-0.361593	0.932292	0.209093	0.272402	0.411765	0	0	0	0	0	0	0	0	0	0	0
chr3R-24387443	0.013889	-0.493856	-0.4685	-0.580286	0.4	1	9	9	0	3	1	0	0	0	0	0
chr3R-19316697	-0.410851	-0.948233	-1.04205	-1.54508	0.426778	0	0	5	0	0	0	0	-0.672149	-0.492971	-0.508891	0.893345
chr2R-15781720	-0.964205	0.609403	-0.209014	0.786376	0.37156	0	0	9	0	0	0	0	0.052948	-0.396468	0.345921	0.865994
chr3R-7188957	0.103712	1.04508	0.081626	0.424411	0.47561	1	9	9	0	3	0	0	0	0	0	0
chr2R-5692294	0.40366	-0.633321	0.174534	0.354632	0.465686	0	0	1	0	0	0	0	0.101526	0.079445	-0.158148	0
chr2R-16706333	-0.149308	-0.304943	-0.797968	0.403653	0.520548	0	0	3	0	0	0	0	0	0	0	0
chr3L-7209315	-0.176204	-0.131829	-0.541528	-1.21507	0.402778	0	0	0	0	0	0	0	-0.312576	-0.518596	-0.584523	0
chrX-6033173	-0.335606	-1.43673	-0.704962	-0.655322	0.469697	0	0	1	0	0	0	0	0	0	0	0.926199
chr3R-24137355	-0.390797	-0.557307	-0.241304	-0.11971	0.36715	0	0	0	0	0	0	0	0.110392	-0.064212	-0.473078	0
chr3R-23892370	-0.8051	0.1283	0.06695	-0.00525	0.52	0	0	0	0	0	0	0	-0.822669	-0.421658	-0.933269	0.896197
chr3L-18308226	-0.57451	0.718281	0.019434	0.617919	0.466063	0	7	11	0	1	0	0	0	0	0	0.939371
chr3L-21782674	0.160718	0.32046	0.650021	0.966883	0.485356	1	8	8	0	0	0	0	-0.496669	-0.659257	-0.394996	0.828154
chr3R-25362340	-0.0182967	-0.951206	-0.707168	-0.560265	0.415929	0	9	9	0	0	0	0	0	0	0	0.71408
chr3R-26536810	0.506989	0.110725	0.2502	-0.092233	0.376667	0	5	8	0	0	0	0	0.764233	0.802979	0.89873	0.885549
chr2L-17044361	0.60531	-1.06163	-0.099241	-0.760422	0.362869	0	0	1	0	0	0	0	0	0	0	0
chr3L-11412591	-1.13121	0.616704	-1.3358	-3.2611	0.454545	6	0	0	2	3	0	0	1.61617	2.10493	1.62257	0.880734
chr3R-12564834	-0.277258	1.94419	0.8008	1.10868	0.27	1	9	9	0	0	0	0	0	0	0	0
chr2L-4350480	-0.113721	0.202213	0.402159	0.702878	0.409594	1	0	1	1	1	0	0	0.534844	0.203437	1.02254	0
chr2R-10940325	-0.421041	-0.740951	0.394531	-0.372019	0.460094	1	0	4	1	3	0	0	-0.509402	-0.226752	0.299578	0.777293
chr3L-10383938	-0.441583	0.438709	0.252583	0.070229	0.4125	0	1	5	0	1	0	0	0.864042	1.2834	0.819126	0.916817
chr3R-21911082	0.216337	0.704851	-0.616774	-0.82524	0.439469	0	8	8	0	0	0	0	0.885423	1.4187	0.544413	0
chr3L-6767868	0.686751	0.418131	-1.54819	-1.76289	0.399083	1	9	11	0	0	0	0	0	0	0	0
chr3R-12637468	-0.210367	0.418144	-0.833029	-1.02807	0.53527	1	9	9	0	3	1	1	0	0	0	0
chr3R-14302183	-0.177036	-0.740545	-0.138327	-0.3674	0.432727	0	0	0	0	0	0	0	0.569808	0.568261	0.618968	0
chr3R-11495061	-0.495691	0.640267	0.386624	0.491026	0.410256	3	3	7	3	0	2	0	0	0	0	0
chr2L-7122255	0.49719	-2.10868	0.981261	-1.14832	0.424779	0	0	8	0	1	0	0	0.64429	0.478453	0.472743	0.831169
chr3R-5286799	-0.019674	0.83425	0.701	0.982841	0.286364	0	0	0	0	0	0	2	0	0	0	0.706215
chr3R-8174479	-0.952175	-0.909293	-1.36121	-1.04917	0.421525	1	2	2	0	0	0	0	0	0	0	0
chr3R-24470605	-0.918993	1.31189	-1.86171	-2.31155	0.459364	0	0	0	0	0	0	0	-0.336346	0.067236	-0.606864	0
chr3R-22225550	-1.23703	1.00641	0.160725	0.52	0.4	0	0	0	0	0	0	0	-0.302278	0.233667	-0.352311	0.931608
chr3R-9742119	0.0837283	-0.627974	-0.639716	-0.036469	0.369668	1	9	9	0	0	0	0	-0.798288	-0.587611	-0.198065	0
chr3R-7992451	-0.741521	-1.28263	-0.002652	-0.135625	0.450758	0	0	5	0	0	0	0	-0.733266	-0.470045	-0.678982	0.888889
chr3R-2754574	0.122197	-0.126602	-0.18937	-0.192407	0.433333	1	9	9	0	1	0	0	-1.10145	-1.17373	-0.771868	0
chr3R-9346530	0.265677	-0.1383	-0.752446	-1.00212	0.399281	0	0	0	0	0	0	0	-0.094922	0.098576	-0.25047	0
chr3R-27103474	0.116997	-0.210572	-0.079427	0.310264	0.453745	0	0	2	0	1	0	0	0.065601	0.377451	0.747149	0.859719
chr3R-2126773	-0.0517107	-1.22631	-0.642416	-1.19253	0.426966	0	1	0	0	1	0	0	-0.589125	-0.550876	-0.997289	0.877483
chr3R-22249035	-0.53645	0.589657	0.493736	0.694495	0.487365	0	0	0	0	0	0	0	0	0	0	0.931608
chr3L-755046	0.458229	0.62925	0.861458	0.788604	0.504167	0	0	2	0	0	0	0	0	0	0	0
chr3R-12075573	-1.52601	1.74009	0.414202	0.426573	0.464789	9	0	0	9	3	0	6	0	0	0	0
chr2L-7327391	0.312942	1.66917	0.379977	0.441808	0.389671	1	7	10	0	0	0	0	0	0	0	0.941704
chr2L-16019584	0.369447	5.14214	-2.52369	-2.78243	0.391089	0	0	1	0	0	0	0	0	0	0	0.925602
chr2L-14426507	0.339834	-1.27552	0.023667	-0.640167	0.516667	3	6	11	4	0	0	0	0	0	0	0.897567
chr3L-22941194	-0.816091	2.02887	1.74243	1.70784	0.477273	5	1	0	5	3	1	1	0.522347	0.917743	0.854891	0.70024
chr2L-18001084	0.391132	1.26275	1.14763	1.14967	0.423868	0	0	1	0	0	0	0	-0.418468	-1.00517	-0.963491	0.841775
chrX-15154819	-0.0383027	1.79701	0.951636	1.40393	0.407273	0	0	1	0	0	0	0	-0.397216	-0.177532	-0.211263	0.86281
chr3R-19448511	-0.0105557	-0.0841075	-0.680728	-0.895188	0.535211	0	0	2	1	0	0	0	-0.525871	-0.561278	-0.429668	0.893345
chr3R-20976967	0.160218	-2.45669	-0.829064	1.39565	0.526502	2	2	4	0	0	0	0	-0.179426	-0.096163	-0.444654	0
chr3R-25109800	0.0255663	-0.276293	-0.127217	-0.777709	0.46798	3	0	1	2	2	0	0	1.54232	1.12215	1.45496	0.868307
chr3L-6131871	0.00622533	0.440074	0.268603	0.357941	0.372549	0	0	1	0	0	0	0	0	0	0	0.737374
chr3L-6673909	0.050966	1.31929	-1.42193	-1.43232	0.361868	0	0	1	0	0	0	0	0	0	0	0.779264
chr3L-12716393	-0.920714	0.487987	-1.71534	-1.81252	0.431818	1	6	8	0	0	0	0	0.089864	0.065834	-0.022882	0
chr3L-10847466	0.409321	-0.90774	-0.281426	-0.801554	0.480769	5	0	0	2	5	0	3	1.06227	1.58909	1.39618	0
chr3L-6831212	0.17324	-0.434646	-1.00414	-1.21286	0.435829	0	6	11	0	0	0	0	-0.49849	-0.573227	0.239871	0.746888
chr3L-6778960	0.068789	0.527524	0.464732	0.645415	0.453659	1	9	11	0	1	0	0	-0.71864	-0.804196	-0.318842	0
chr3L-729592	0.230632	-0.481761	0.06146	-0.022664	0.437956	1	0	2	3	0	0	0	0	0	0	0
chr3R-23891860	-1.40941	0.194799	-0.633983	-1.12805	0.457627	0	0	0	0	0	0	0	-0.821437	-0.419581	-0.931075	0.896197
chr3R-21894672	-0.0444597	-0.098626	0.583454	-0.141431	0.473282	0	0	3	0	0	0	0	0	0	0	0
chr2L-11673616	0.11508	-1.52325	0.197033	0.378517	0.421053	0	0	1	0	0	0	0	0	0	0	0.909314
chr2L-14528856	-0.371522	-0.639949	1.83873	-1.92156	0.416667	1	6	11	1	1	0	0	0	0	0	0.928903
chr2L-19937388	0.898067	-0.500178	0.081689	-0.086156	0.444444	0	0	2	0	0	1	0	0	0	0	0
chr3L-791585	-0.54587	-1.11379	-0.152612	-0.260075	0.462687	5	1	5	1	4	0	1	1.74817	1.8319	2.02185	0.896552
chr3L-6829244	-0.906688	2.31542	-0.898235	-2.11725	0.428571	0	6	11	0	1	0	0	-0.472527	-0.579819	0.238531	0.746888
chr2L-19755205	-1.58915	2.17727	0.566886	-1.5285	0.454545	1	4	4	0	1	2	0	0.093494	-0.400371	0.256182	0
chr3R-17720704	-0.09656	1.7719	3.407	3.70175	0.320197	0	0	0	0	0	0	0	1.10071	1.41122	1.35687	0
chr3L-16470349	0.111373	0.0014465	-0.474828	-1.0875	0.455882	1	1	5	0	3	0	0	0	0	0	0
chr2L-11717673	-0.316655	-1.9143	-2.63564	-2.68321	0.364583	0	0	1	0	0	0	0	0	0	0	0.909314
chr3R-15099416	-0.299712	-1.6845	-0.512576	-0.967186	0.441558	0	0	0	0	1	0	0	-0.132331	-0.756136	0.602413	0.859425
chr3L-1659363	0.0599693	0.71579	-0.321	-0.182837	0.311628	0	0	0	0	0	0	0	0	0	0	0
chr3R-13781272	-1.7772	-0.582233	-0.161546	0.182137	0.458015	1	0	4	1	1	0	0	-0.872866	-0.987055	-0.444284	0
chr2L-18747511	0.132033	-0.722599	-0.341439	0.959766	0.446043	1	9	11	0	0	0	0	0.336054	0.21391	-0.148074	0.78836
chr2L-3708695	0.210175	-1.0624	0.065808	1.11458	0.471616	0	0	0	0	0	0	0	0.982128	0.367714	0.173781	0
chr3R-6413432	0.181666	-0.971143	0.200294	-0.762127	0.520362	2	1	5	1	3	0	0	0	0	0	0
chr3R-12389129	-0.258679	0.760785	-0.793575	-0.918188	0.458937	0	0	7	0	0	0	0	0	0	0	0
chrX-6756747	-3.85119	2.40913	-1.17991	1.68745	0.509434	6	0	0	5	4	0	6	1.53556	0.785516	1.29618	0
chr3R-24294755	-0.583636	0.60823	-1.71931	-2.149	0.4689	0	0	3	0	0	0	0	-0.75042	-0.660014	-0.787818	0.896552
chr2L-1304760	-0.645107	0.223034	-0.137669	0.120587	0.448399	0	0	2	0	0	0	0	-0.559388	-0.589054	-0.350187	0
chr3L-17299193	0.211867	0.0400665	-0.468683	-0.314063	0.441964	0	0	2	0	0	0	0	-0.705786	-0.695138	-0.794546	0.882096
chr2L-7372899	-0.0797263	0.283594	0.551816	1.22294	0.512438	1	6	9	0	1	0	0	0.73189	0.476482	0.405632	0.941704
chr3L-14094099	-0.421625	0.032833	-2.3694	-1.64452	0.380805	0	5	8	0	1	0	0	-0.028314	0.328488	-0.282734	0.878405
chr3R-2870539	-0.474206	0.825376	-1.30441	-0.764322	0.424699	1	7	7	0	0	0	0	-0.618914	-0.829821	-0.538255	0
chrX-9914051	0.026003	1.41737	0.510121	1.15211	0.407767	0	0	0	0	0	0	0	0	0	0	0.820856
chr3R-3168854	0.270194	-2.24904	0.147809	-0.266731	0.484099	0	1	3	0	0	0	0	0	0	0	0.841941
chr3L-788846	-0.272656	-1.27379	-1.19479	-1.09077	0.406639	0	0	5	0	1	0	0	0	0	0	0.896552
chr2R-18085609	-0.64633	-0.535693	1.51678	0.041479	0.502347	2	0	1	0	1	0	0	0.488448	0.195955	-0.026658	0
chr3R-13910751	-0.599008	0.068814	-0.702605	-0.29414	0.390698	0	6	9	0	0	0	0	0	0	0	0.783673
chr3R-19242624	0.084097	-0.616461	0.538106	0.361113	0.501661	0	0	5	0	0	0	0	-0.447401	-0.310935	-0.292562	0.893345
chr2R-14110640	0.457787	-1.1613	-0.129037	0.346976	0.476351	0	0	7	0	1	0	0	-0.306505	-0.440554	0.070216	0.822222
chr3L-6815725	-0.00385967	-0.35171	-0.745241	0.075833	0.416667	1	4	11	0	3	0	0	0	0	0	0.746888
chr3R-22220060	-0.0482427	1.70126	-0.811502	-1.11094	0.37931	0	0	0	0	0	0	0	-0.321091	0.19424	-0.397684	0.931608
chr3R-886492	0.57718	0.686126	-0.538886	-1.40817	0.469194	7	0	0	4	4	0	1	0.889607	-0.079581	1.51221	0.814469
chr3R-25030624	-0.125147	2.36601	-0.289185	0.290198	0.343612	1	0	0	0	1	0	0	0	0	0	0
chr2R-14049862	-0.123333	0.762101	-0.135149	-0.246567	0.328358	0	0	0	0	1	2	0	-0.326058	-0.112173	-0.049469	0
chr3R-12569290	-0.605129	-1.3067	-1.85983	-0.335034	0.447811	1	9	9	0	2	0	0	-1.39163	-1.40063	-1.02558	0
chr3R-6643905	-0.238301	-1.13707	0.195718	-0.353589	0.478469	0	0	0	0	0	0	0	0.198227	0.017569	-0.008581	0
chr3R-6273105	1.09651	-1.20978	-0.529545	-1.63599	0.513834	0	1	7	0	0	0	0	-0.340605	-0.479986	0.185999	0
chr2L-11012901	0.412621	-1.60681	-0.109758	-0.491956	0.53629	0	0	0	0	0	3	0	0	0	0	0
chr2L-15991405	-0.70042	-0.133016	0.99133	-1.55807	0.449541	0	0	1	0	0	0	0	0.243562	-0.133728	-1.099	0.925602
chr3R-21890963	-0.555564	-0.108696	-0.218984	-0.571653	0.426295	0	0	1	0	0	0	0	0	0	0	0
chr3R-23042094	-0.343628	-0.63676	-0.459115	-0.934136	0.395062	0	0	6	0	1	0	0	0.604991	0.653156	0.39101	0.875862
chr2R-19419784	0.0187043	-1.69723	-1.80803	-2.28837	0.377551	0	0	1	0	0	0	0	0	0	0	0
chr2L-8628480	-1.31765	-0.367968	-1.34594	-0.682537	0.46798	0	0	0	0	0	0	0	0	0	0	0
chr3L-14583976	-0.710969	-0.0321055	0.620911	-0.583768	0.512315	1	9	11	0	1	1	0	0	0	0	0
chr3L-6821825	0.194129	-0.38385	-0.23887	-0.707343	0.535565	3	4	11	3	4	0	0	0	0	0	0.746888
chr3L-1016305	1.01704	-1.09922	0.636232	0.172512	0.423645	0	0	0	0	0	0	0	0	0	0	0.91236
chr3R-10294150	0.515771	-1.15103	0.851204	0.171759	0.453704	7	0	0	3	3	0	0	0	0	0	0
chr3R-5288495	-0.0689423	1.25255	0.619928	0.632452	0.360577	0	0	0	0	0	0	0	0.334985	0.62171	0.127682	0.706215
chr3L-21788627	0.941778	-1.43969	-0.33381	-0.726152	0.516729	1	9	9	0	0	0	0	-0.499908	-0.642415	-0.341327	0.828154
chr2L-16564700	0.63916	-0.437865	0.714875	0.544458	0.445833	0	0	0	0	0	0	0	0.844198	1.63277	1.10497	0
chr3R-17977214	0.456964	-0.493872	-0.784091	-1.16312	0.501567	2	0	3	2	1	0	0	0	0	0	0.874142
chrX-21664822	0.264254	-0.334713	-0.041269	0.059154	0.522388	0	7	0	0	0	0	0	0	0	0	0
chr3L-7567148	0.0997993	-0.734576	0.72192	0.748326	0.410714	0	0	0	0	0	0	0	-0.280095	-0.398574	-0.240511	0.926606
chr3R-9756500	-0.26033	-0.132095	-0.069279	0.087725	0.414414	1	9	9	0	3	0	0	0	0	0	0
chr3R-23001249	-0.253624	-0.859788	-0.524152	-0.74433	0.508929	0	2	5	0	0	0	0	0.40581	0.437534	0.427719	0
chr3R-13194906	-0.669632	-0.025305	-0.144601	-0.378662	0.43662	0	0	0	0	0	0	0	0	0	0	0
chr2L-2444270	-0.390227	1.11176	0.944068	0.698114	0.513636	1	6	10	0	1	1	0	0	0	0	0.799642
chr2R-13253215	-0.145616	1.63467	0.201463	0.676812	0.243902	0	0	0	0	0	0	0	0	0	0	0.850178
chr3R-12638921	-0.735257	-1.09528	-0.273369	-0.454571	0.339056	2	9	9	0	1	0	0	0	0	0	0
chr3L-15352246	0.0272103	0.94163	0.590595	-1.08447	0.387665	0	0	5	0	0	0	0	-0.406701	0.405285	-0.203571	0.86288
chrX-22002493	-0.399422	1.70567	0.654013	0.47682	0.364035	0	0	0	0	0	0	0	0	0	0	0.926916
chr3R-24190102	-1.00976	-0.186211	0.347125	-0.141655	0.432056	0	0	3	0	0	0	0	-0.778524	-0.535056	-0.779542	0.896552
chr3R-24219849	-0.138591	-0.18765	0.35906	0.014981	0.477444	0	0	3	0	0	0	0	-0.539369	-0.390905	-0.78927	0.896552
chr3L-7548176	0.227276	-0.543706	0.150934	-0.201342	0.455253	0	0	0	0	0	0	0	-0.229853	-0.398382	-0.309009	0.926606
chr3R-9394667	0.0897183	-0.728333	-0.301353	-0.010097	0.444444	0	0	0	0	0	0	0	0	0	0	0
chr3R-2845064	0.186057	-0.720947	0.167404	-0.259029	0.429936	1	9	9	0	0	0	0	0	0	0	0.814433
chr3R-4034684	0.627599	-1.62607	0.903929	0.152143	0.456349	3	8	9	1	3	0	0	-0.14905	-0.480356	-0.281316	0
chr2L-16805667	0.627582	0.20424	0.221397	0.645245	0.421569	0	1	0	0	0	0	0	0	0	0	0
chr3R-24067575	-0.772952	0.914054	-0.426443	-0.056592	0.427861	0	0	0	0	0	0	0	0	0	0	0.896197
chr2L-14826280	0.270668	1.39991	-1.11765	-1.87976	0.474265	0	0	1	0	0	0	0	0	0	0	0.838748
chr3R-11937991	0.208038	-1.59549	1.00754	0.147297	0.4689	0	0	0	0	0	0	0	0.795313	0.298752	0.602433	0
chr3R-19321034	-0.037979	-1.54583	-0.101377	-0.811667	0.487923	0	0	5	0	0	0	0	0	0	0	0.893345
chr3L-10387805	0.148357	-0.585569	-0.429171	-0.827251	0.454976	1	1	5	0	0	0	0	0	0	0	0.916817
chr2L-5569935	-0.402385	-0.777698	-0.203391	-0.881188	0.480198	0	4	6	0	0	0	0	-0.868107	-0.268858	-0.788352	0
chrX-17835456	0.259122	0.55933	0.125561	-0.243195	0.409756	0	5	0	0	0	0	0	-0.175116	-0.539374	-0.326181	0.822976
chr2R-15867057	0.401559	-1.37608	-0.93119	-1.15802	0.447581	1	0	4	2	1	0	0	-0.188093	-0.366306	0.401558	0.865994
chr3L-11394920	-0.203423	-0.69968	-0.397192	-1.32084	0.438424	4	0	0	0	1	0	0	0	0	0	0.880734
chr3L-9272844	-0.350041	0.603922	0.456078	0.603946	0.382353	0	0	0	0	0	0	1	0	0	0	0.758621
chr3R-19329953	0.0521647	-0.192156	0.873957	0.78064	0.563981	0	0	5	1	0	0	0	0	0	0	0.893345
chr3R-20922075	-0.473907	1.05032	-0.862571	-0.511368	0.382075	1	7	8	0	3	0	0	0.362623	0.006628	-0.161403	0
chr3L-11391519	0.28649	0.460159	-0.689322	-1.8043	0.457627	0	0	0	0	0	0	0	1.54427	2.04885	1.77416	0.880734
chr2L-8632668	-0.875494	-0.183015	0.943391	0.814249	0.44206	0	0	0	0	0	0	0	0	0	0	0
chr2L-14261107	0.347173	-0.912827	0.14486	0.329065	0.453271	0	4	8	0	3	0	0	0.341987	0.717881	1.10448	0.965225
chr3R-12040095	0.400419	0.659904	0.812536	0.559348	0.521739	4	0	0	1	1	0	1	1.31068	0.873189	1.47314	0
chr3R-8171494	0.376181	-0.0774995	-0.051079	-0.241061	0.464029	0	2	3	0	0	0	0	0	0	0	0
chr2R-4891998	-0.0347923	-0.917475	-0.566095	-0.519627	0.502488	0	0	4	0	1	0	0	0	0	0	0
chr3L-18337055	-0.479581	1.03837	-1.12544	-1.92737	0.465116	0	7	10	0	0	0	0	-0.1797	0.164479	0.208166	0.939371
chr2L-21816969	-0.428667	-0.0603	-0.575575	1.205	0.41	1	8	11	0	0	0	0	-0.455935	-0.793176	-0.062277	0
chr3R-27174936	0.0776217	0.07169	0.533192	0.359319	0.370892	0	0	1	0	1	0	0	-0.558336	-0.439219	-0.14013	0.859719
chr2L-14397996	0.32027	0.140024	0.493873	0.054951	0.465686	3	2	10	0	1	0	0	-0.840142	-0.789266	0.656313	0
chr3R-3255520	0.305505	0.583354	-1.62513	-1.65487	0.42735	0	0	0	0	0	0	0	-0.247699	-0.239654	-0.571772	0.841941
chr3R-22230742	-1.18153	1.91385	0.722529	0.83917	0.401544	0	0	0	0	0	0	0	0	0	0	0.931608
chr3R-6259808	-0.533374	1.33952	3.56688	1.73019	0.463415	0	0	7	0	0	0	0	-0.069542	-0.273789	0.295407	0
chr2R-824066	0.313977	0.668416	-0.402351	0.350347	0.326733	0	9	0	0	0	0	0	0	0	0	0
chr3L-13631884	-0.787713	-1.18252	-0.229318	-0.349091	0.495868	0	0	3	0	0	0	0	-0.887408	-0.778214	-0.915898	0.8027
chr3R-22369454	0.193115	-0.468236	-0.043416	-0.053258	0.420814	1	0	0	0	2	0	0	0	0	0	0
chr3R-16198912	-1.066	2.98147	-2.10476	-2.82512	0.435407	0	0	1	0	0	0	0	-0.698177	-0.86004	-0.860332	0.819847
chr3L-9242835	-0.555235	0.0516535	-0.701834	-0.61174	0.492163	0	0	0	0	0	0	0	0	0	0	0.758621
chr3R-12878310	-0.494348	-0.350278	-0.914311	-0.977133	0.497778	1	0	0	1	3	0	0	0.646004	0.442624	0.359785	0
chr3L-20603398	-0.0250717	-1.33112	0.216929	-0.946262	0.57619	1	6	8	0	0	0	0	-0.678466	-0.618719	-0.265161	0.889051
chr3R-12573625	-0.411535	-1.92085	0.605665	-1.50325	0.448276	1	9	9	0	0	1	0	-1.40141	-1.40463	-1.03569	0
chr2R-11433423	-0.159278	-0.413185	-1.02269	-1.6557	0.492593	1	0	0	2	2	1	0	-0.198891	-0.328951	-0.305987	0
chr2L-7630118	-1.74263	1.65727	-1.34556	-0.857812	0.416667	0	2	10	0	0	0	0	0.024953	0.677356	0.767	0.912664
chr3L-10270810	-1.02856	1.63677	-2.82551	-2.66488	0.427907	2	7	9	0	1	0	0	0	0	0	0.895765
chr3L-13663959	-0.361853	-1.4946	-0.375898	-0.584175	0.456311	0	0	3	0	0	0	0	-0.905044	-0.572305	-0.989921	0.8027
chr3L-22196171	-0.979393	-0.189744	-0.774579	1.21192	0.46729	1	0	3	0	0	0	0	-0.281331	-0.348732	-0.579624	0.776938
chr3R-4980850	0.204471	-1.47936	-0.702251	-1.09261	0.50237	0	0	1	1	1	0	0	0	0	0	0
chr2R-20716158	0.286458	0.221701	0.504904	0.429183	0.435096	1	9	11	0	1	0	0	-0.468877	-0.382929	-0.407051	0.87451
chr3R-4208083	-0.39971	2.23477	1.52729	1.48447	0.261468	0	1	2	0	0	0	0	0	0	0	0.903114
chr3L-676524	0.0578417	-1.17351	-0.35825	-1.22315	0.465	0	0	3	0	2	0	0	0	0	0	0
chr2L-10631612	-0.264718	-0.801771	-0.190848	0.26263	0.395652	0	1	7	0	0	0	0	-0.528443	-0.290172	-0.493445	0.804702
chr3L-13537112	-0.385918	0.632361	0.556296	0.415093	0.606481	0	4	3	0	0	0	0	0	0	0	0.8027
chr3R-6644945	-0.49385	0.322248	-0.183057	-0.074127	0.436681	0	0	0	0	0	0	0	0.178283	0.005588	-0.016521	0
chr3L-6445809	-1.11549	0.880054	-1.58679	-1.07157	0.393013	0	6	4	0	0	0	0	0	0	0	0.839735
chr3R-25472226	0.578009	-1.46662	-0.119408	-0.807536	0.49763	0	0	6	0	0	0	0	-0.49186	-0.756657	-0.313718	0.71408
chr2L-9950831	0.162388	-1.37609	0.553803	0.385693	0.537815	1	0	0	2	2	1	0	0	0	0	0
chr3L-12616859	0.376727	-1.56417	-1.01665	-1.68028	0.46988	1	9	11	0	0	0	0	0	0	0	0
chr3R-23920900	-0.430595	-0.602477	0.195603	0.156696	0.473214	0	0	0	0	0	0	0	0	0	0	0.896197
chr2L-3998937	-0.309903	-0.462736	0.336906	0.639103	0.452915	0	0	1	0	0	0	0	0	0	0	0.754386
chr3R-10605783	0.0986003	0.458313	0.646578	0.995655	0.364078	0	0	0	0	0	0	0	-0.339956	0.02097	-0.163192	0.839181
chr3R-23050726	0.165146	-0.464505	0.297656	-0.007033	0.450549	0	0	4	0	0	0	0	0.530297	0.655156	0.382801	0
chr3R-1730388	-1.30992	1.54437	-0.592356	-1.82242	0.457778	0	0	0	0	0	0	0	-0.474811	-0.721926	-0.892447	0.879781
chr3R-13136245	-0.752162	0.26671	-0.339434	-0.167217	0.466981	0	0	0	0	0	0	0	-0.845104	-0.752173	-0.78958	0.854701
chrX-16081397	0.742273	-1.57244	-0.073523	0.063795	0.486364	1	9	7	0	1	0	0	0.891738	-0.020826	0.526784	0.822006
chr2R-7333000	-1.05271	1.61384	-0.679547	0.067334	0.372822	0	0	0	0	0	1	0	0.478101	0.474784	0.672039	0
chr2L-5230071	-0.33386	-1.07093	0.48306	0.27322	0.396	4	0	0	0	1	0	1	0.236852	0.047254	0.795568	0.889813
chrX-7356207	-0.363677	1.41146	0.511308	0.832846	0.449231	0	0	2	0	0	0	0	0	0	0	0.88984
chr3R-9766129	0.550718	-1.21012	-0.311756	-0.427244	0.475556	1	8	8	0	0	0	0	-0.722771	-0.461878	-0.083816	0
chr3L-22553040	-0.392988	-2.27079	-2.54138	-3.31552	0.357527	0	1	7	0	0	0	0	0	0	0	0.915809
chr3L-14512066	0.07235	-0.079769	0.262857	0.154147	0.456221	0	1	1	0	0	0	0	0	0	0	0.878405
chr3L-18694749	0.253486	0.614675	-0.994396	-2.0335	0.516908	0	0	0	0	0	0	0	-0.250677	-0.109297	-0.389267	0.705263
chr2R-7359711	0.113714	-0.670223	-0.999821	-1.74425	0.439286	1	8	10	0	0	0	0	-0.230101	-0.12089	0.809755	0
chr3L-21886877	0.3572	0.08724	1.01256	0.62676	0.484	1	0	0	1	3	0	2	-0.884764	-0.716905	-0.56657	0
chr2R-15754861	0.156865	-0.356563	1.69864	-0.387787	0.47234	0	0	9	0	0	0	0	0.282899	-0.336548	0.519985	0.865994
chr3R-4615422	-0.211443	-0.248973	0.345929	0.405138	0.422925	0	0	0	0	1	0	0	0.863166	0.477735	0.214528	0.92562
chr3R-18957886	-0.203639	-1.67384	-0.818945	-0.924564	0.486239	1	9	9	0	1	2	1	0.610966	0.880519	-0.167643	0
chr3R-6644437	-0.758709	-0.070191	0.164719	-0.451165	0.481928	0	0	0	0	0	0	0	0.189715	0.012639	-0.011904	0
chr2R-16037153	0.0315407	-0.297806	0.619599	0.721816	0.5	0	0	9	0	0	0	0	0	0	0	0.865994
chr2R-14124668	-0.0678337	0.18875	-0.336783	-0.457326	0.46087	2	0	8	1	1	3	0	0	0	0	0.822222
chr3R-2103295	0.437709	-0.508436	-0.785473	-0.781109	0.429091	0	0	0	0	0	0	0	-0.579495	-0.564656	-1.01452	0.877483
chr3L-6353142	-0.325536	-0.433676	0.515792	-0.383688	0.509901	0	2	5	0	0	0	0	0	0	0	0.839735
chr2L-5575509	0.00719267	-1.38842	-1.03925	-1.07932	0.425439	0	4	6	0	0	0	0	-0.932923	-0.338015	-0.864326	0
chr3R-24341625	-0.701115	0.159002	0.048851	-0.570444	0.350806	0	2	4	0	0	0	0	0	0	0	0.896552
chr3L-13690191	-0.698251	-0.138787	-1.87371	-2.40582	0.524752	0	0	2	0	0	0	0	-0.959117	-0.591204	-1.00562	0.8027
chr2L-1565291	-1.39793	-0.751238	-1.93147	-1.11014	0.457944	0	0	1	0	0	0	0	0	0	0	0.921429
chr3L-17089462	-0.97103	-0.02343	-1.35217	-0.433549	0.430034	0	0	0	0	0	0	0	-0.799167	-0.98737	-0.773715	0
chr3L-12666318	0.052006	0.357272	0.983789	0.002737	0.466667	1	9	11	0	1	0	0	0.352914	0.078227	0.025648	0.891304
chr2L-15040807	0.155078	0.599413	-0.158592	-0.372136	0.43662	0	0	0	0	0	0	0	0.191673	-0.11754	-0.146736	0
chr3R-24071509	-0.93301	-0.656327	-0.317156	-0.817109	0.483412	0	0	0	0	0	0	0	0	0	0	0.896197
chr3R-19284570	-0.0720737	-0.468269	-0.472104	-0.194615	0.497738	1	0	5	0	0	0	0	-0.596005	-0.533201	-0.447436	0.893345
chr2R-15656611	0.167447	-0.728439	-0.55161	-0.146293	0.385366	0	0	3	0	0	0	0	0	0	0	0.865994
chr3R-27379812	-0.836721	-1.16705	-1.47741	-0.574935	0.42671	0	0	1	0	0	0	0	-0.755457	-0.18635	-0.232774	0.991098
chr3R-12523608	-0.262635	-0.648389	-0.208471	-0.008271	0.395294	2	9	9	1	2	0	0	-1.26059	-1.53648	-1.00198	0
chr3L-20915558	0.105935	-0.051835	0.373629	-0.722975	0.438819	2	2	5	1	4	0	2	0.299292	0.028636	0.328146	0.957447
chr2L-372128	-0.67311	1.10058	-0.112222	0.530856	0.384259	1	9	11	0	2	0	0	-0.064518	0.345627	0.431383	0.946058
chr2L-15219290	-0.33712	-0.117464	-0.331315	-0.531268	0.384977	0	0	4	0	0	0	0	0	0	0	0.924675
chr3L-3473098	-0.066584	-0.354728	0.086584	0.767822	0.435644	0	0	0	0	0	1	0	0.676092	0.781708	0.962843	0
chr3R-8654577	-0.137484	-0.338736	-2.74128	-2.22632	0.442379	0	0	1	0	0	0	0	-0.383837	-0.223497	-0.531923	0.850508
chr3R-8170333	0.355821	-0.866144	0.388308	0.069129	0.492537	1	2	4	0	0	0	0	0.254953	0.539121	0.422399	0
chr2L-17732553	0.292282	0.330246	0.28202	-0.128424	0.423645	0	3	5	0	0	0	0	-0.649889	-1.25021	-1.01658	0.841775
chr3L-14137481	0.187525	-1.12319	-2.09055	-2.26549	0.468085	1	9	11	0	0	0	0	-0.738727	-0.30486	-0.370095	0.878405
chr3R-21380442	-0.0586403	-0.29028	-0.498932	-0.101723	0.383495	0	0	0	0	0	0	0	-0.900399	-0.713188	-0.738202	0.911661
chr3L-16321137	0.795364	-1.69843	0.073592	-0.505147	0.470588	0	0	0	0	0	0	0	0.117573	0.227014	0.568762	0.851485
chr3R-6382824	-0.958549	-0.252534	-0.663796	-0.57213	0.472222	2	2	6	0	4	0	0	0	0	0	0
chr3R-25358250	-0.474685	2.97703	-2.52632	-2.76351	0.393035	1	9	9	0	0	0	0	-0.861599	-0.807961	-0.332421	0.71408
chr3R-27733344	-0.472207	-0.408204	0.37831	0.010845	0.41784	0	0	1	0	0	0	0	-0.776069	-0.789013	-0.418977	0
chr3L-6659401	-0.387881	-0.020063	-0.714268	-0.892	0.389286	0	0	1	0	0	0	0	-0.235847	-0.592041	-0.46068	0.779264
chr3R-24005543	0.427366	-2.42957	-2.06329	-3.61878	0.336585	0	0	0	0	0	0	0	0	0	0	0.896197
chr2R-11805665	-0.546116	-0.221261	0.047991	0.175759	0.361607	0	0	1	0	1	1	1	-0.536071	-0.084407	-0.300705	0
chr2L-2627128	-0.00581667	-0.899675	-0.826775	-0.731675	0.475	0	0	0	0	0	0	0	0	0	0	0.888087
chr3L-15671251	-1.08823	-0.488069	-0.389109	-1.18233	0.39604	0	3	8	0	0	0	1	0.480998	1.32072	0.984765	0.936449
chr3L-20658846	0.76186	-0.840024	-1.50681	-1.49164	0.425926	0	9	9	0	0	0	0	-0.541554	-0.484052	-0.317896	0.889051
chr3R-24032586	0.0380933	-1.03184	0.307326	0.395093	0.460465	0	0	0	0	0	0	0	-0.657227	-0.343708	-0.97071	0.896197
chr2R-3212420	0.345145	1.3719	-0.203612	0.640084	0.337793	1	0	0	0	0	0	0	-0.524995	-0.049532	-0.077531	0.809969
chr3R-9385124	-0.391653	-0.239401	-0.174979	-0.579145	0.444444	0	0	0	0	0	0	0	0.100795	0.783419	0.043219	0
chr3R-9263688	1.22491	-1.61328	-0.308936	-0.24948	0.435644	0	0	0	0	0	0	0	0	0	0	0
chr2R-15607526	-0.55853	-1.88093	-2.58917	-3.18351	0.364583	0	0	0	0	0	0	0	0	0	0	0.865994
chrX-2861972	-0.68224	1.07975	-0.143326	-1.05399	0.422908	0	0	0	0	0	0	0	0.573547	0.604624	1.4489	0.804404
chr2L-3011262	0.026167	1.06071	-0.172194	0.208376	0.438819	0	0	0	0	0	0	1	-0.423102	-0.049114	-0.142043	0
chr3R-17994665	-0.115241	-0.628906	0.352537	-0.266119	0.348259	0	1	3	0	0	0	0	0	0	0	0.874142
chr3L-14884398	0.220054	1.05501	-1.32336	-1.59322	0.444444	0	0	0	0	0	0	0	-0.32177	0.253923	-0.468672	0.936416
chrX-14414783	0.0465317	1.51744	0.604833	0.53019	0.419048	0	0	0	0	0	0	0	-0.582111	-0.831458	0.352523	0.866513
chr2R-16374832	-0.717871	-0.104339	-1.22031	2.02073	0.370044	0	0	1	0	0	0	0	-0.514311	-0.692157	-0.881332	0.828125
chr3L-21454477	0.0372457	0.444314	0.191632	0.169618	0.336806	1	9	9	0	1	0	0	0.164581	1.22092	0.37467	0
chr3R-12049917	0.589214	-0.914477	0.569881	0.401857	0.542857	5	0	0	1	2	0	4	1.37817	0.835881	1.48778	0
chr2L-20243371	0.629737	-1.00486	1.53876	0.341914	0.421053	0	0	2	0	0	0	0	-0.150793	-0.356006	0.295588	0
chr3L-18302173	-0.939731	-0.0767845	-0.450921	-0.922319	0.414474	1	8	11	0	0	0	0	-0.103731	0.438548	0.35147	0.939371
chr2R-12042151	-0.463251	3.35116	3.80127	3.65753	0.470588	4	0	0	0	3	0	0	0	0	0	0
chr2R-14125986	-0.526127	0.24538	0.476642	0.415294	0.426471	1	0	8	0	2	1	0	-0.09025	-0.430391	0.13383	0.822222
chrX-9579145	-0.984583	2.03227	0.00348	-0.005907	0.377451	2	0	1	3	0	7	8	0.12362	-0.128341	0.364378	0
chr3R-3251722	-0.407681	-1.05372	0.776348	-0.194022	0.426087	0	0	0	0	0	0	0	0	0	0	0.841941
chr3L-10441823	-0.214683	0.776567	0.227433	0.09695	0.406667	0	0	2	0	0	0	0	0.419788	0.785119	0.015441	0.916817
chr3L-3711328	0.174509	0.793815	0.449697	-0.161135	0.440449	1	0	4	0	0	0	0	0.011216	-0.629996	-0.585917	0.939394
chr3L-21101066	-0.08261	1.59745	-0.366675	-0.870024	0.367925	0	0	0	0	0	0	1	0	0	0	0.838196
chr3L-3705560	0.167332	-1.25724	-1.0831	-1.4703	0.428571	0	0	8	0	0	0	0	0.136065	-0.545035	-0.537685	0.939394
chr3R-4796421	-0.013428	1.06101	-0.943178	-1.00449	0.421053	0	0	1	0	0	0	0	0.138298	0.239235	0.09158	0
chr2L-4787919	-0.841071	1.83093	-1.26502	-0.249819	0.475113	0	0	3	0	0	0	0	-0.587316	-0.482875	-0.601137	0
chr3R-22994248	-0.176784	1.28684	0.582441	0.384554	0.492958	0	1	4	0	0	0	0	0	0	0	0
chr2L-8911704	0.619785	-1.1178	-0.235711	0.060044	0.413333	0	0	0	0	0	0	0	0.153269	0.573816	-0.055311	0.893987
chr3L-3393873	0.193037	-0.29866	0.158389	-0.187977	0.471649	3	0	0	0	3	0	0	1.27405	1.20538	1.36684	0
chr3R-3600073	-0.16612	0.021245	-0.128684	-0.472206	0.461538	0	1	1	0	0	0	0	0.31468	0.069927	-0.433328	0
chr3L-5827608	0.376088	-0.437951	0.091502	1.29075	0.493562	0	5	11	0	1	0	0	-0.397686	-0.878294	-0.407335	0
chr3R-9271823	-0.888661	0.973002	-1.65007	-1.57482	0.436681	1	0	0	0	1	0	0	0	0	0	0
chr3R-18179455	-0.171446	-0.823222	-0.629824	-0.71541	0.410156	0	0	0	0	0	0	0	0	0	0	0
chr3R-25669421	-0.234838	-0.387792	-0.309024	-0.804488	0.439024	2	0	0	1	0	0	1	-0.177114	-0.306178	0.297766	0
chr3L-10381186	0.109704	0.364412	0.651049	0.191303	0.46822	2	1	4	1	2	0	0	0.915919	1.27262	0.836972	0.916817
chr3R-20902745	-0.675118	0.183957	-0.578681	-0.861398	0.472441	1	7	7	2	4	2	0	0.302714	-0.037023	-0.085061	0
chr2R-10855012	0.61629	-0.823555	1.68088	-0.523704	0.481728	7	0	0	1	2	1	0	-0.391466	-0.133866	0.020039	0
chr3R-27112091	-0.114602	-0.0133335	-0.548682	0.294726	0.447761	0	0	2	1	0	0	0	0.08147	0.377122	0.801823	0.859719
chr3R-1803669	0.0451853	0.788227	0.713355	0.60547	0.410256	0	0	0	0	0	0	0	0	0	0	0.879781
chr3R-2682930	0.278408	-0.64256	0.247337	0.022629	0.38488	1	9	9	0	1	0	0	0	0	0	0.769547
chr3R-19484727	-0.360222	-0.0392205	0.223214	0.552857	0.36039	1	0	0	0	1	0	0	0.157519	0.05238	0.231128	0.893345
chr3L-20979796	0.045393	0.062653	0.535991	0.524575	0.481132	0	0	0	0	0	0	0	0.002472	-0.026605	0.630133	0.957447
chr3L-12625290	1.02979	0.266392	-0.86405	-2.53197	0.402715	0	9	11	0	0	0	0	0	0	0	0
chr3R-23884888	0.039442	1.47754	-0.545357	-0.452121	0.424107	0	0	0	0	0	0	0	0	0	0	0.896197
chr2R-18748027	0.0670627	0.289603	-0.659824	-0.577269	0.422908	1	8	9	0	3	0	0	0	0	0	0
chr2R-18158936	-0.0201063	-0.503248	0.408701	1.13836	0.421569	1	7	11	0	2	2	0	-0.137361	-0.009187	0.246247	0.872024
chr2L-14369827	0.59913	-0.384736	0.419737	0.59756	0.440191	0	1	3	0	0	0	2	-0.112026	-0.13351	0.799741	0.866279
chr3R-10324905	0.088094	-0.316646	0.312129	0.616906	0.470297	0	0	1	0	0	0	0	0.276697	0.278694	0.13939	0
chr2L-12802514	-0.07128	0.193108	0.146179	0.769354	0.448669	0	0	0	0	0	0	0	-0.030126	0.719296	0.330733	0.799414
chr2L-7368057	-0.349993	-0.588131	0.073694	0.037613	0.396396	1	6	9	0	0	0	0	0.792962	0.482568	0.401628	0.941704
chr3L-10850003	-2.72889	2.07256	0.130297	0.760548	0.410959	2	0	0	1	2	2	6	0.933473	1.55415	1.34723	0
chr3L-7695561	-0.0590897	1.36585	0.390997	0.554494	0.297688	0	0	1	0	0	0	0	0	0	0	0.707904
chr2R-10548068	-0.852933	-0.332335	0.097193	-1.83576	0.448113	0	0	1	0	0	0	0	-0.188612	-0.07505	-0.391503	0
chr2L-14472353	0.079651	0.655774	-0.264429	-0.300667	0.433333	1	7	11	0	1	0	1	0	0	0	0.897567
chr3L-12612432	0.805749	-2.28461	-0.929694	-1.4822	0.49345	1	9	11	0	1	0	0	0	0	0	0
chr3L-12443712	0.0804933	1.3335	0.500024	0.297791	0.38835	1	9	11	0	1	0	0	-0.39929	-0.517531	-0.239979	0
chr3L-21586656	0.068544	0.363488	0.786087	0.812391	0.454545	1	9	9	0	1	0	0	0.31068	0.469699	0.334454	0
chr2L-17107240	0.476615	0.570341	-0.972643	-1.12141	0.436123	0	0	1	0	0	0	0	-0.955742	-1.12189	-1.07611	0
chr3R-25369124	-0.319155	-0.474195	-0.411967	-0.484408	0.507109	1	9	9	1	2	0	1	-0.919963	-0.860551	-0.373388	0.71408
chr3R-12548396	-0.0273577	0.41439	0.837673	0.705782	0.483636	1	9	9	0	0	0	1	0	0	0	0
chr3L-4516134	0.308292	0.038867	0.668399	0.601675	0.448276	1	0	0	2	1	0	0	0	0	0	0.804281
chr3R-7083440	-0.540051	1.80648	-0.063364	-1.63795	0.461774	1	6	9	0	0	0	0	0.08309	-0.174856	-0.329324	0
chr3R-12535743	0.0497857	0.084954	-0.281743	0.209977	0.408257	1	9	9	0	1	0	0	0	0	0	0
chr3R-12887616	-0.197608	0.0579	0.178675	0.034075	0.535	6	0	0	3	4	0	2	0	0	0	0
chr3L-13095617	-0.678451	1.51333	-0.919629	-0.84712	0.385159	0	4	9	0	0	0	0	-0.499088	-0.212045	-0.604336	0.82249
chr3R-24238120	-0.291626	-0.800557	-0.833462	-0.512321	0.456044	0	0	3	0	0	0	0	-0.362176	-0.388701	-0.789016	0.896552
chr3R-22449264	-0.517403	-0.370856	-0.146944	-0.322099	0.410494	0	0	0	0	0	0	0	-0.906362	-0.572042	-0.910019	0.872774
chr3R-15154232	0.349199	-0.70761	0.033058	0.370413	0.383495	1	0	0	1	0	0	0	-0.345151	-0.724753	0.002111	0.859425
chr3R-15086346	-0.783159	-0.067381	-2.04041	-2.70322	0.426087	0	0	0	0	0	0	0	0	0	0	0.859425
chr3R-24049519	-0.093492	1.19182	0.011374	-0.061484	0.358974	0	0	0	0	0	0	0	-0.609072	-0.284499	-0.99058	0.896197
chr3L-12658164	0.0550083	-0.498275	-2.1411	0.670625	0.44	1	9	11	0	3	0	0	0.162741	0.027127	0.059163	0.891304
chr3R-17933372	-0.363278	1.10652	0.41231	0.339905	0.280952	0	0	1	0	0	0	0	-0.065193	0.225191	-0.049197	0.874142
chr2R-18157939	-2.12825	0.895674	-0.657861	0.258438	0.451923	1	7	11	0	2	2	0	-0.128644	-0.012289	0.255172	0.872024
chr3L-8446526	-0.549238	1.84896	-1.48181	2.46095	0.375566	1	0	0	0	2	0	2	0	0	0	0
chr2R-18044900	0.176055	-1.66701	-0.38844	-1.00567	0.458716	1	0	3	0	3	0	0	0	0	0	0
chr2L-4613081	0.0558	-0.5418	-0.51405	-0.483325	0.48	0	0	2	0	0	0	0	-0.546429	-0.991012	-0.783472	0.90642
chr3R-12047259	-0.554876	2.1788	0.377918	-0.248381	0.466192	6	0	0	2	4	0	2	0	0	0	0
chr2L-2652618	0.587009	-0.208166	-2.42867	-1.64627	0.360656	0	0	0	0	0	0	0	-0.758454	-0.424656	-0.772054	0.888087
chr2R-4231484	0.354893	1.09305	1.22132	1.23314	0.410256	0	1	7	0	0	0	0	-0.13345	-0.041452	-0.351214	0.789773
chr3L-6776454	0.0142573	-1.25314	-1.98002	-0.882067	0.43695	1	9	11	0	0	0	0	-0.715375	-0.792001	-0.338918	0
chr3R-13187076	-0.304078	1.36267	0.770631	0.626456	0.470874	0	0	0	0	0	0	0	0	0	0	0
chr3R-15120741	-0.513107	1.68645	0.927243	1.09343	0.415888	0	0	0	0	0	0	0	-0.330323	-0.718003	0.671626	0.859425
chr3L-10295380	-0.14023	0.958214	-0.357857	0.064064	0.44335	1	7	9	0	1	0	0	0.263553	0.341419	0.051995	0
chr3L-14128832	-0.586073	-1.61073	-2.7416	-1.60631	0.485611	1	9	11	0	3	1	0	0	0	0	0.878405
chr3R-9391184	-0.464073	0.363451	0.581197	-0.297711	0.426056	0	0	0	0	0	0	0	-0.067234	0.878907	-0.073131	0
chr2L-14115580	-0.877126	1.18745	1.30099	1.83416	0.374384	0	0	2	0	0	0	0	-0.272491	-0.206673	-0.241662	0.852119
chr2L-11379241	0.187822	-0.253028	-0.145908	-0.332515	0.491071	1	8	11	0	0	0	0	-0.595372	-0.912074	0.314213	0.853234
chr3R-9365472	0.422249	-2.50511	0.233848	-1.0505	0.494424	1	0	0	0	0	0	0	0	0	0	0
chr3R-23036980	-0.600781	0.216891	0.602072	0.161689	0.463964	0	3	7	0	0	0	0	0.569825	0.627571	0.393678	0.875862
chr3L-2762008	0.776038	-0.913821	-0.306108	-0.254245	0.5	2	0	0	0	0	1	1	0	0	0	0.946565
chr3R-3067672	-0.217376	0.838122	0.555072	0.671196	0.516746	0	0	1	0	0	0	0	0.005685	0.345568	-0.401596	0
chr3L-15369177	0.739854	-0.980097	-1.02233	-1.55541	0.485437	0	0	2	0	0	0	0	-0.365914	0.325581	-0.226996	0.86288
chr3R-18172398	-0.122205	0.223839	0.554055	0.709902	0.452756	0	0	0	0	0	0	0	-0.530862	-0.081536	-0.632469	0
chr2R-5378676	0.20327	-1.43968	-0.39783	-0.401722	0.45283	0	5	6	0	3	0	0	0.625588	0.207996	0.414959	0.783217
chr2L-15416718	-0.407573	-0.612664	-0.90759	-0.63658	0.387622	0	6	11	0	0	0	0	-0.472093	-0.947647	-0.984249	0.984496
chr3R-9416124	0.195502	-0.0147225	0.105093	-0.102755	0.388889	0	0	0	0	0	0	0	-0.168221	1.19702	-0.334986	0
chr3L-10575659	-0.336052	2.49305	-0.987097	-0.824793	0.341014	0	0	0	0	0	0	0	0	0	0	0
chr3R-8724139	-0.281872	0.299963	0.226847	0.284557	0.389163	0	0	1	0	0	0	0	-0.61595	-0.332074	-0.554352	0.850508
chr3R-16283485	-0.910324	0.40995	0.452857	0.62754	0.440476	0	0	2	0	0	0	0	0	0	0	0.819847
chr3R-23924444	-0.535028	-0.466805	-0.284959	-1.03369	0.443983	0	0	0	0	0	0	0	-0.696834	-0.471697	-0.933833	0.896197
chr3R-14325526	-0.542844	0.12007	-0.169036	-1.33568	0.473896	0	0	0	0	0	0	0	0	0	0	0
chr2R-6965494	0.78613	-1.13449	1.1758	0.361897	0.494253	1	0	2	1	1	0	0	0.686424	0.016853	-0.140027	0
chr3R-13614361	-0.154127	1.46988	0.817099	0.918679	0.457547	0	0	0	0	0	0	0	0	0	0	0
chr3L-10203933	-0.867009	0.452346	-0.547695	-0.429918	0.432099	0	0	1	0	0	0	0	0	0	0	0.895765
chr3L-10951842	0.425416	-0.124541	0.490332	0.091152	0.457031	1	7	10	0	0	0	0	-0.204636	0.445747	0.496156	0.793834
chrX-7680559	-0.244145	0.79848	0.438736	0.901758	0.457875	0	0	3	0	0	0	0	0	0	0	0.819277
chr3R-24893709	0.364754	-0.625416	0.590185	0.156236	0.479705	2	0	0	0	0	0	0	-0.289086	0.041478	-0.325862	0
chr3L-19737980	0.121824	0.12032	-0.368547	-0.286474	0.448718	0	0	0	0	0	0	0	0	0	0	0
chr3R-24787018	-0.342001	-0.552639	-0.334461	0.309758	0.423792	0	0	1	0	0	0	0	-0.455985	-0.537851	-0.495995	0.80177
chr3L-11465551	-0.293588	-0.0314365	-0.359191	-0.439979	0.434043	1	0	0	1	1	0	0	0	0	0	0.880734
chrX-3644169	-0.505547	1.32632	0.093775	0.12152	0.45098	2	0	0	0	1	0	3	0	0	0	0
chr2L-4599741	0.0975173	-0.614357	-0.091992	-0.218506	0.473029	0	0	1	0	0	0	0	0	0	0	0.90642
chr3R-13458346	-1.30341	0.662249	-2.86873	-3.22636	0.425837	0	0	2	0	0	0	0	0	0	0	0
chr3L-14910844	-0.749968	1.01857	-0.448504	0.155682	0.363636	0	0	0	0	0	0	0	-0.470892	0.029768	-0.342445	0.936416
chr2L-18884859	0.665943	-1.48306	-0.812303	-1.49101	0.47807	1	9	11	1	2	1	0	0	0	0	0
chr2L-13103244	0.276658	-0.041094	-0.013333	0.244677	0.343284	0	0	1	0	0	0	0	0	0	0	0.763285
chr3R-27682809	0.467929	-1.03944	-0.944356	-1.32337	0.470297	0	0	1	0	0	0	0	0	0	0	0
chr2L-15376134	0.206549	-0.445083	0.504378	-1.08407	0.493776	1	5	11	0	0	0	0	-0.581952	-1.01834	-1.10163	0.984496
chr3R-17819965	0.381675	-0.497003	-0.079502	0.054428	0.537313	0	0	0	1	0	0	0	-0.290974	0.90523	0.433677	0.745763
chr3R-15191576	-0.687804	-1.04339	-0.205059	-0.193235	0.423529	0	0	0	1	1	0	0	-0.795555	-0.79142	-0.483887	0.859425
chr3R-23547870	-1.51278	-0.622999	-1.02833	-2.49833	0.40678	0	0	0	0	0	0	0	-0.468279	-0.513266	-0.579519	0.870259
chr3R-10209666	-1.3985	2.39666	-1.27315	-2.19093	0.427313	0	0	4	0	0	0	0	0	0	0	0
chr3R-14906585	0.063894	-1.38455	0.335314	-0.374776	0.533632	3	0	0	0	0	0	1	-0.468532	-0.375482	-0.406753	0.837838
chr2L-13590446	0.535169	-1.50819	-0.436797	-0.628618	0.447005	0	0	0	0	0	0	0	0	0	0	0
chr3R-14351535	-0.093907	-0.119228	0.156897	-0.088939	0.424437	0	0	0	0	0	0	0	0.092009	0.231853	-0.113879	0
chr2R-4176476	0.461074	0.67411	0.50046	-0.517238	0.51046	0	3	8	0	0	0	1	-0.517414	0.083068	-0.083925	0.789773
chrX-5585543	0.0895163	1.46664	1.10654	0.689424	0.331797	1	0	0	0	0	0	0	0.488854	0.311977	0.785563	0
chr2L-15400519	-0.386704	0.363247	-0.701878	-0.450204	0.393665	0	6	11	0	1	0	0	-0.5487	-0.973535	-1.0429	0.984496
chr2L-8906825	0.853812	-0.654089	-1.2318	-0.535441	0.425287	0	0	0	0	1	0	0	0.097969	0.517402	-0.082815	0.893987
chr3L-14877558	0.574575	0.340224	-0.781297	0.35941	0.382075	0	0	0	0	0	0	0	-0.280098	0.310166	-0.496295	0.936416
chr3R-22475691	-0.780113	0.727402	-0.320995	-0.557476	0.538835	0	0	0	0	1	0	0	0	0	0	0.872774
chr2L-2433779	0.3904	-1.28646	-0.18605	0.36885	0.405	0	0	8	0	0	0	2	0.074975	-0.084729	0.257883	0.799642
chr3L-18357375	0.113235	-0.188163	0.270183	0.270137	0.456621	1	8	10	1	0	0	0	0	0	0	0.939371
chr3L-19196773	-0.60067	0.896292	-0.651421	-1.08919	0.461255	0	2	2	0	1	0	0	0	0	0	0.736986
chr3R-9333120	0.502383	-0.7563	-0.5172	-0.504975	0.535	0	0	0	0	0	0	0	0	0	0	0
chr2L-22081713	-0.515183	-2.33498	-0.452725	0.69675	0.465	0	4	3	0	0	0	0	-1.11983	-0.204433	-0.268404	0
chr3L-10415299	-0.529039	0.148222	-0.2575	0.001394	0.466346	0	0	3	0	0	0	0	0.848955	1.21222	0.326734	0.916817
chr3L-15914865	0.266483	0.191413	0.23325	0.166225	0.52	1	0	0	0	1	0	0	0	0	0	0.79402
chr3R-9269439	-0.562606	1.02691	-1.03913	-0.617042	0.450704	1	0	0	0	0	0	0	-0.157369	0.053933	-0.376656	0
chr3L-6921352	-0.192087	-1.22058	-0.223568	-0.76966	0.466019	1	8	9	0	0	0	0	0	0	0	0
chr3R-27334028	-0.223032	0.141152	0.073807	0.532346	0.485597	0	0	1	0	0	0	0	0	0	0	0.991098
chr3L-7276966	-0.259458	0.54786	0.046326	-0.061698	0.437209	0	0	2	0	0	0	0	0	0	0	0.777778
chr2L-11404156	0.160588	0.277041	1.00326	0.308068	0.381643	0	6	11	0	0	0	0	-0.56637	-0.929141	0.134558	0.853234
chr3L-21647269	-0.0383103	0.259381	-0.650105	-0.742979	0.372822	1	0	1	0	1	0	0	-0.040497	0.192374	-0.169135	0.828154
chr2R-15729357	0.217477	0.444605	1.78905	0.740514	0.498024	0	0	9	0	0	0	0	0	0	0	0.865994
chr2L-5367248	0.0756553	0.003847	-0.106869	-0.016626	0.446602	1	9	9	0	0	0	0	0	0	0	0.751304
chr2L-15584188	-1.02347	2.64114	-1.57111	-1.63956	0.458937	0	0	3	0	0	0	0	-0.27258	-0.712249	-0.911604	0.870528
chrX-1618194	-0.190493	0.753205	0.192371	0.88892	0.469484	0	9	5	0	0	0	0	0.14884	0.291057	-0.08402	0
chrX-18090929	0.462481	0.102103	0.271586	-0.105264	0.568282	0	0	2	0	0	0	0	0	0	0	0.781609
chr2L-15317446	-0.324549	-1.27836	0.557005	-0.083285	0.512077	1	9	11	0	1	0	0	0	0	0	0.984496
chr2L-20948357	-1.10543	1.56064	-0.561974	1.89599	0.4375	0	0	0	0	0	0	0	1.17315	0.752744	1.12397	0.886555
chr2L-13942090	0.231303	0.158323	0.71246	0.64381	0.460317	0	0	0	0	0	0	0	0.309727	0.652935	0.005099	0.922141
chr2R-1154998	-0.396825	2.67651	1.39533	1.70424	0.419753	0	9	0	0	0	0	0	0.12605	0.713427	0.345227	0
chr3R-20903183	-0.417024	-0.946226	0.321881	-2.04974	0.419048	1	7	8	2	5	2	0	0.308768	-0.036463	-0.085368	0
chr3R-7157892	-0.008842	-1.13311	-0.62635	0.12177	0.548673	0	2	7	0	0	0	0	0	0	0	0
chr3L-5965620	-0.708109	-0.888904	-0.034664	-1.4264	0.416961	3	0	6	4	4	0	0	-0.803013	0.129629	0.971764	0.737374
chr2R-6233993	-0.666237	0.001168	0.637869	0.924672	0.454918	0	0	0	0	0	0	0	-0.804841	0.187846	-0.233354	0.810811
chr2R-14130027	0.118817	0.266255	0.519108	0.689274	0.473029	0	0	8	0	3	0	0	0	0	0	0.822222
chr3R-10457515	0.0582557	-0.933686	-0.383814	1.24149	0.548837	0	0	0	0	1	0	1	0.363741	0.491172	0.335543	0.811927
chr2L-4550381	-0.869004	0.910227	-0.325239	0.249067	0.301435	0	2	2	0	0	0	0	0	0	0	0.90642
chr3R-7309825	-0.342662	0.99289	-1.82071	-1.96491	0.458874	0	0	0	0	0	0	0	-0.400099	-0.387406	-0.565596	0
chr3L-17258405	0.529367	-0.758676	0.092149	0.750362	0.429864	0	0	1	0	0	0	0	-0.850115	-0.751333	-0.852277	0.882096
chr3L-20564918	-0.146913	-0.857441	-0.415024	-0.137452	0.409524	1	0	6	0	0	0	0	-0.637613	-0.490731	-0.120816	0.889051
chr3R-8589863	-0.013522	0.118412	-1.02687	-1.34835	0.339901	0	0	1	0	0	0	0	0	0	0	0.850508
chr2L-21843519	0.197526	-1.72239	0.475202	1.15103	0.41704	3	9	11	3	3	0	0	0	0	0	0
chr3R-15165787	-0.0990213	-1.62356	-1.51243	-2.41675	0.438298	1	0	0	2	3	0	0	0	0	0	0.859425
chr3R-13192965	-0.564414	-0.305635	-0.770918	-0.531934	0.429688	0	0	0	0	0	0	0	-0.727505	-0.606203	-0.715723	0
chr3R-9397900	-0.333451	0.0174905	-1.16954	-1.84293	0.537037	0	0	0	0	1	0	0	0	0	0	0
chr3R-10856209	0.0355967	0.809124	0.265	0.476125	0.516605	0	0	0	0	0	0	0	0	0	0	0
chr3L-13585692	-0.0915377	-1.06115	0.072077	0.035662	0.459559	0	0	3	0	0	0	0	-1.03346	-0.656166	-1.14628	0.8027
chrX-7199080	-0.0790833	1.83411	0.9589	0.907895	0.291866	0	0	1	0	1	0	0	0	0	0	0
chr3R-24291154	-0.665849	0.200603	-0.421341	0.245307	0.344828	0	0	3	0	0	0	0	0	0	0	0.896552
chr2R-17084065	0.076103	0.603861	0.181324	0.036691	0.387255	4	0	0	1	1	0	1	-0.073324	0.246606	0.354945	0
chr2L-13663801	0.554442	-1.00165	0.46037	0.148913	0.473913	0	0	1	0	0	0	0	0	0	0	0
chr3R-25387410	-0.0398297	-0.196126	-0.574547	-0.600278	0.479532	1	9	9	1	3	3	1	-0.757258	-0.836437	-0.377125	0.71408
chr3R-3783111	0.293971	-0.699404	-0.317969	-0.605156	0.460938	1	9	9	0	2	1	0	0.091509	-0.295347	0.119085	0.739496
chr2R-20173428	-0.340967	-0.24583	-0.185854	0.014122	0.458537	0	0	4	0	1	0	0	0.097306	-0.035323	-0.004808	0.72973
chr3R-19245861	-1.10582	1.42033	-0.234444	-0.422181	0.378601	0	0	5	0	0	0	0	-0.476288	-0.351559	-0.333853	0.893345
chr3R-12512144	-0.281363	0.435271	0.655468	0.622291	0.433498	1	9	9	1	0	0	0	0	0	0	0
chr2R-13897350	0.538	4.60348	-1.52612	-2.18627	0.453659	1	0	2	0	0	0	0	-0.479713	0.638197	-0.647351	0.782341
chr3R-2288071	-0.655052	1.51439	-0.954052	-1.7685	0.396552	0	0	0	0	0	0	0	-0.111444	0.071427	-0.298989	0
chr3R-12543349	-0.12916	-0.0647985	0.395445	0.789661	0.487288	2	9	9	1	3	0	0	-1.33283	-1.50829	-1.0133	0
chr3R-15169148	0.300749	-0.823696	-1.0129	-1.26797	0.429952	1	0	0	2	3	0	0	-0.523078	-0.735899	-0.248899	0.859425
chr3R-18972801	-0.10152	-1.09394	-0.836637	-0.907271	0.485915	1	7	9	0	2	1	0	0	0	0	0
chr3R-18734509	0.141716	0.491559	-0.222197	-0.908096	0.41841	0	0	3	0	0	0	0	0	0	0	0.879931
chrX-5947222	-0.044697	1.31109	0.820526	0.409952	0.545455	0	1	2	0	0	0	0	0.408993	-0.082483	0.651898	0
chr2L-11333722	0.000682667	2.61173	0.868829	0.758439	0.331707	0	9	11	0	1	0	0	0	0	0	0.853234
chr2R-4226524	0.38937	-0.340721	1.05412	-0.128086	0.5	0	2	7	1	1	0	0	0	0	0	0.789773
chr2L-523023	-1.88312	2.50741	1.89412	-0.12051	0.470588	2	5	11	2	3	0	3	0	0	0	0
chr3R-17536937	-0.652911	0.503545	-0.851294	-0.167313	0.512438	0	0	0	2	0	0	0	0	0	0	0.982143
chr2R-20693115	0.441802	-1.21123	-0.839525	-0.359819	0.470588	1	9	11	1	1	0	0	-0.607458	-0.248653	-0.212357	0.87451
chrX-10539770	-0.0943143	0.727943	-0.079892	-0.658939	0.428571	0	0	0	0	0	0	0	0.479257	-0.565445	-0.011985	0.757497
chr3R-20736878	-0.561487	0.839643	0.353961	0.725801	0.406926	0	0	0	0	0	0	0	0.034203	-0.349327	-0.411462	0
chrX-7368382	-0.570332	1.23087	0.481219	0.402761	0.40796	0	0	2	0	0	0	0	0.41321	0.899873	0.91794	0.88984
chr2L-85746	-0.389471	0.432748	0.248294	-0.140403	0.459716	1	0	0	1	0	1	0	0	0	0	0.892157
chr3R-23967546	-0.109069	-0.20989	-1.56125	-1.18208	0.4375	0	0	0	0	0	0	0	-0.540247	-0.412771	-0.9028	0.896197
chr3L-1063867	0.04605	1.87931	-2.43433	-2.81438	0.443333	0	0	5	0	0	0	0	-1.00981	0.379824	0.439369	0
chr2R-19193235	0.058366	0.215437	0.094927	0.060291	0.504854	0	0	6	0	0	0	0	0	0	0	0.864212
chr3R-12998092	-0.489903	-0.143732	-0.216449	-1.31063	0.47343	0	0	0	0	0	0	0	0	0	0	0.90303
chr2L-14499681	-0.408606	0.62711	-0.674182	-0.86661	0.394805	0	3	11	0	0	0	0	-0.554229	-0.113585	1.49114	0.928903
chr3R-3130762	0.077731	0.211857	-1.05037	-1.01171	0.371287	0	2	4	0	0	0	0	-0.654943	-0.43412	-0.581631	0.841941
chr3L-17354955	-0.390452	-0.0978005	-0.542052	-0.445849	0.459906	0	4	3	0	2	1	0	-0.471627	-0.404893	-0.659545	0.932331
chr3R-23844277	-0.704187	1.25515	0.531294	0.142413	0.487562	0	0	0	0	0	0	0	0	0	0	0.896197
chr3R-25380222	-0.467815	0.194806	-2.39524	-2.97864	0.378641	1	9	9	0	1	0	0	-0.829085	-0.842013	-0.378697	0.71408
chr3L-9276626	-0.489259	-0.191667	-0.247991	-0.427479	0.440171	0	0	0	0	0	0	0	0	0	0	0.758621
chr3R-12511499	0.147835	0.39458	0.19535	-0.118201	0.425234	1	9	9	2	1	0	0	-1.147	-1.38193	-0.848258	0
chr3R-21858129	0.260772	-1.72798	0.744702	-0.931193	0.472477	3	5	7	3	4	0	0	1.11521	1.58578	1.41381	0
chr3R-9719433	0.453929	-1.69376	-2.32959	-1.5521	0.458937	1	9	9	0	2	1	0	0	0	0	0
chr3L-20623113	0.676854	-2.62794	-0.212086	0.293725	0.440397	1	9	9	1	1	0	0	-0.594019	-0.544538	-0.267314	0.889051
chr3R-12506626	0.265651	-1.3021	0.045929	-0.329238	0.409524	1	9	9	0	0	0	0	0	0	0	0
chrX-20508659	-0.016955	0.342792	0.484346	0.907523	0.509346	1	8	7	0	1	0	0	-0.015879	-0.918071	-0.278203	0.887693
chr3L-6623150	0.295833	-0.726923	-0.361397	0.245637	0.436274	0	0	0	0	0	0	0	0	0	0	0
chr3R-22443797	-0.46599	0.280929	0.241709	0.243184	0.435897	1	0	0	0	0	0	0	0	0	0	0.872774
chr3R-3036869	0.136653	-0.004579	0.559659	0.193755	0.506024	0	0	0	0	0	0	0	0.521273	0.499962	-0.387225	0.811881
chr3R-21928465	0.306983	-0.199661	0.758559	0.405695	0.440678	1	6	9	0	1	0	0	1.13147	1.55718	0.500251	0
chrX-22206001	-0.145193	0.596153	1.33361	0.115018	0.383803	0	1	0	0	0	0	0	0.302892	-0.340074	-0.218334	0.926916
chr3L-10385204	-0.37	-1.18105	0.346313	1.00269	0.4625	1	1	5	0	2	0	1	0.836548	1.28995	0.805981	0.916817
chr3R-26594294	0.350983	-1.63764	-0.496074	-1.2801	0.402344	1	9	9	0	0	4	0	1.15985	0.943816	1.18948	0
chr3R-2611679	-0.12288	0.83057	-2.39714	-2.9293	0.446602	1	9	9	0	0	0	0	0	0	0	0
chr3R-8422353	0.532	0.031325	-0.974275	-1.29432	0.43	0	0	1	0	0	0	0	-0.028296	0.280282	-0.109299	0.794788
chr3R-12575805	-0.516402	0.480463	-0.525617	-0.677753	0.471366	2	9	9	0	4	0	0	-1.40808	-1.40917	-1.04183	0
chr3R-6398162	-0.459067	-0.623715	0.314049	0.295475	0.454225	4	2	6	1	3	0	2	-0.574096	-0.027808	0.006568	0
chr3L-2823735	-1.67903	1.06928	-0.174327	0.751851	0.475962	1	0	0	0	4	0	5	-0.045001	-0.244219	-0.711175	0
chr3R-18312484	-0.289032	1.78862	1.14309	1.30604	0.221198	0	0	0	0	0	1	1	0	0	0	0
chr2R-21135641	-1.20121	0.730953	-0.295881	0.149221	0.364754	0	1	0	0	0	0	0	0.668076	0.625604	0.104668	0
chr3R-1757724	0.00291667	1.04396	1.03537	1.00457	0.405	0	0	0	0	0	0	0	-0.471607	-0.713909	-0.894199	0.879781
chr2R-7653841	0.223845	-0.01089	0.06236	-1.15886	0.430712	0	1	8	0	0	0	0	1.3692	0.743302	0.82146	0.867841
chr3R-6366481	0.305697	0.469352	0.007455	-0.432977	0.404545	1	2	6	0	0	0	0	0	0	0	0
chr3R-11951267	0.215853	-1.05112	-0.156377	0.872053	0.468599	0	0	4	0	1	0	0	0.732723	0.417277	0.569439	0
chr3R-9266181	-0.670008	3.28001	-2.11765	-2.84535	0.502347	1	0	0	0	0	0	0	0	0	0	0
chr3L-21589351	0.328082	-0.262752	0.298915	0.323113	0.537736	1	9	9	3	5	2	0	0	0	0	0
chr2L-2482084	0.0632513	-0.46451	-0.108309	0.15652	0.426471	0	1	8	0	0	0	0	0.084048	-0.277338	-0.412326	0.799642
chrX-1298463	-0.103133	2.48444	0.620537	0.465702	0.533058	0	0	1	0	0	0	0	0	0	0	0.959538
chr2R-20260463	0.330385	-0.0271	-0.321345	-0.07401	0.472081	1	9	11	0	2	0	0	0	0	0	0.72973
chr3R-12518264	-0.730975	3.30833	-2.29011	-2.47487	0.436681	2	9	9	0	2	0	0	0	0	0	0
chr3L-12680722	-0.660911	-0.414766	-0.135234	-1.81685	0.425234	1	9	11	1	3	2	0	0	0	0	0.891304
chr2L-1504707	0.325985	-1.48899	-0.62	-0.683234	0.423792	0	0	3	0	0	0	0	-0.212512	0.624537	0.342125	0
chr3R-9737662	-0.31123	0.764702	-0.688667	-0.557119	0.37619	1	9	9	0	0	0	0	-0.78263	-0.594705	-0.216234	0
chr3L-6805167	0.065849	-0.016823	-0.570748	-0.803598	0.425234	1	6	11	0	0	0	1	-0.502518	-0.688315	-0.029611	0.746888
chr2R-20161365	0.208498	-1.0582	-0.119631	-0.286232	0.551724	2	0	4	3	3	0	0	0	0	0	0.72973
chr2R-15960605	0.0221977	-0.792586	-0.196816	0.386716	0.432836	0	1	9	1	2	0	0	0	0	0	0.865994
chr2R-4187674	-0.309655	0.491197	-0.363544	-0.385129	0.514563	0	2	8	0	0	0	0	-0.472193	0.031285	-0.176661	0.789773
chrX-18004153	-0.115851	2.26011	0.628139	1.03054	0.316017	0	3	0	0	0	0	0	0	0	0	0
chr3R-23903060	-1.13688	0.485614	-0.353721	0.061296	0.524917	0	0	0	0	0	0	0	-0.807843	-0.456313	-0.975631	0.896197
chr2L-19222522	0.262076	-0.113004	0.340482	0.474846	0.517544	1	5	10	3	2	0	1	-0.033306	-0.175907	0.339062	0.875256
chr3R-22676439	-0.515761	-0.61575	-0.380457	-0.407283	0.426087	0	0	0	0	0	0	0	-0.927455	-0.478785	-0.396727	0.931217
chr2R-11130372	0.0628263	-0.854021	-0.113756	0.018387	0.428571	0	0	0	0	0	0	0	0	0	0	0
chr3R-10249784	0.362638	-0.266456	-0.668678	-0.674172	0.458599	0	0	3	0	0	0	0	-0.907524	-0.508398	-0.348508	0.894737
chrX-1432302	-0.0773033	0.870472	0.625127	0.835727	0.414545	0	2	5	0	0	0	0	0	0	0	0
chr3L-12679170	-0.466165	-0.648298	-0.694155	-1.8076	0.410959	1	9	11	1	4	1	0	0.367995	0.082113	0.004402	0.891304
chrX-16027488	-0.49827	0.97468	-1.74583	-1.88992	0.46383	0	9	5	0	0	0	0	0.561645	0.258948	0.514	0.822006
chr3R-18972493	-0.313577	0.327115	0.095842	0.118901	0.516484	1	7	9	0	2	1	0	1.0797	1.13028	-0.095889	0
chr3R-27827882	-0.417193	-1.74325	-2.5912	-3.22387	0.364583	0	0	0	0	0	0	0	0	0	0	0
chr3R-3206733	0.097371	1.75556	-0.630061	-1.17492	0.413374	0	0	1	0	0	0	0	-0.63748	-0.414797	-0.641849	0.841941
chr3L-14685187	-1.49903	-0.0799585	-2.51448	-2.5754	0.379167	0	0	1	0	0	0	0	0.402546	0.743939	-0.096596	0
chr3L-12276147	-0.439137	-0.274442	-0.300469	-0.242656	0.40625	0	1	2	0	0	0	0	0	0	0	0
chr3R-7161901	0.00289533	1.0494	0.807373	0.411797	0.451613	0	2	7	0	0	0	0	-0.341884	-0.209858	-0.35271	0
chrX-13521132	0.171826	0.440192	0.334689	0.18122	0.416268	1	0	0	1	1	0	1	0	0	0	0
chr3L-14135698	-0.447677	0.0512965	-1.82491	-1.82616	0.490741	1	9	11	0	1	0	0	-0.740439	-0.292788	-0.36831	0.878405
chr3R-20966392	-0.0141333	-0.631812	-0.85545	-0.894	0.52	1	2	4	2	1	0	0	-0.048161	-0.037478	-0.429164	0
chr2L-9801680	0.309118	0.616992	0.034387	-0.070153	0.328691	0	0	0	0	0	0	0	0	0	0	0.880795
chr3R-12330372	-0.601579	-1.52446	-0.438038	0.283434	0.460377	0	0	7	1	2	3	0	-0.536073	-0.25807	-0.141409	0
chr3R-19244698	-0.896904	-0.611948	-1.88385	-2.02704	0.438953	0	0	5	0	0	0	0	-0.464163	-0.334538	-0.316478	0.893345
chr3R-20414291	-0.667843	-0.789528	-0.134916	-0.133172	0.407563	0	0	0	0	0	0	2	-0.134741	-0.617117	-0.476912	0
chr2R-9840930	-0.661516	2.61272	1.32244	1.43161	0.26378	0	0	0	1	0	3	2	0.415677	-0.135077	-0.027643	0
chrX-20784646	-0.54391	-0.153485	0.767356	0.631562	0.375	0	0	0	0	0	0	0	0	0	0	0.887693
chr3R-10540776	0.43726	-0.365938	0.963317	-0.091274	0.423077	8	0	0	3	4	0	4	0.047961	-0.444072	-0.139974	0
chr3L-10330300	-0.721497	0.557063	-0.692087	-1.06573	0.383495	1	1	6	0	2	0	0	0	0	0	0.916817
chr3L-17556966	-1.1324	1.67336	0.771034	0.865443	0.477833	1	0	0	0	4	0	3	0.34522	0.374255	0.985472	0
chr2L-6307726	0.434754	-0.887235	0.509447	0.872765	0.488479	0	0	4	0	0	0	0	0	0	0	0
chr3R-16555067	-0.793373	0.88622	0.787085	1.07339	0.402844	0	1	1	0	0	0	0	-0.034874	0.377335	-0.350617	0
chr2R-6847486	-0.367548	-0.0630125	-2.24864	-2.21207	0.457143	0	1	1	0	0	0	0	0.065325	0.395101	-0.020563	0.799523
chr3L-18402447	0.435294	-1.71891	-0.527247	0.127269	0.352423	1	7	10	0	0	0	0	0.49131	0.073376	0.591191	0.939371
chr3R-842933	-0.0912237	-0.240369	0.521697	0.935701	0.380074	4	0	0	1	2	0	0	0	0	0	0.814469
chr3R-10310060	0.944606	-1.79178	0.042802	-0.600145	0.449275	0	0	0	0	1	0	0	0.090087	0.157337	0.03884	0
chr2L-20305912	-0.333519	-2.3645	-2.77308	-3.52027	0.34466	0	1	0	0	0	0	0	0	0	0	0.848485
chr2L-5495406	0.453587	-0.448385	-0.148924	-0.045248	0.417219	1	9	9	0	0	0	0	0	0	0	0.751304
chr2L-6819744	-0.559219	0.489624	0.449895	0.647308	0.339161	1	9	11	0	0	0	0	-0.556077	-0.243165	0.227165	0
chr2R-10956919	0.507045	-0.147403	-1.17971	-0.03872	0.381643	0	0	3	0	0	0	0	0	0	0	0.777293
chr3R-19294569	0.210809	-0.966443	0.284184	-1.28077	0.456067	1	0	5	0	1	1	0	-0.59823	-0.534221	-0.459847	0.893345
chr3L-1122518	0.874381	0.0932015	-1.52516	-1.86025	0.429864	1	4	11	0	0	0	0	-0.979647	0.366006	0.154439	0.803545
chr2L-7328401	-0.596451	1.39576	-1.82611	-2.09589	0.397351	0	7	10	0	0	0	0	0	0	0	0.941704
chrX-7167618	0.225046	-0.101725	0.017235	-0.358118	0.384314	1	1	7	0	1	0	0	0	0	0	0
chr3L-13173305	-0.151519	0.360465	-1.18142	-1.74889	0.482301	0	1	9	0	0	0	0	-0.154586	0.538206	-0.416341	0.82249
chr3R-13461680	-0.470162	-0.415	0.000635	-0.180953	0.45485	0	0	2	0	1	0	0	0.891105	0.180736	0.218328	0
chr3L-15671643	-0.977371	-1.76603	0.459095	-2.17552	0.469828	0	3	8	0	0	0	0	0.497366	1.3263	0.99641	0.936449
chr3L-21599644	0.173046	-1.07128	-0.175287	-0.088636	0.392345	1	5	7	0	0	0	0	0	0	0	0
chr3R-17392881	-0.15505	-0.76305	-0.315259	-0.439547	0.448276	1	8	7	0	1	0	0	0.042903	0.176095	0.614588	0
chr3L-14568331	-0.606103	0.048639	-0.189108	-0.04446	0.389671	1	9	11	0	1	0	0	0	0	0	0
chr3L-5606024	0.325997	0.11855	-0.424589	-0.708379	0.424658	0	0	2	0	2	0	0	0.439487	0.22418	-0.146369	0
chr2R-18920424	-0.795235	-0.863116	-1.76137	-2.68315	0.453745	0	6	8	0	0	0	0	-0.512945	-0.697525	-0.182784	0.851735
chr3R-9685169	-0.141615	0.947693	-2.24477	-0.458205	0.432432	1	5	7	0	0	0	0	-0.760665	-0.186791	0.129789	0
chr3R-7166050	0.534329	-1.13801	-0.181593	-1.13544	0.433628	1	3	7	0	0	0	0	-0.305903	-0.204617	-0.295589	0
chr2R-17473975	0.106912	-2.37744	1.88305	-0.902574	0.470588	0	0	6	0	0	0	0	0.465398	0.692155	0.641813	0.752212
chr3R-22900235	0.02302	0.254999	-0.504243	-0.482064	0.412844	0	0	0	0	0	0	0	0.797267	0.821589	0.610721	0.873096
chr3L-14822629	0.409192	-1.83961	-2.20192	-2.64005	0.351097	0	0	3	0	0	0	0	0	0	0	0.936416
chr3L-22181120	-0.541445	0.871537	0.31711	0.313463	0.472477	1	0	6	0	1	0	0	-0.0997	-0.341835	-0.648477	0.776938
chr3R-27376794	-1.12579	3.65864	-0.49778	-2.06634	0.418103	0	0	1	0	0	0	0	-0.756948	-0.231256	-0.279366	0.991098
chrX-19343219	-0.216215	1.1084	0.002199	0.373675	0.466867	0	1	0	0	0	0	0	-0.157809	-0.543872	-0.127589	0
chr2L-17237819	0.17747	-0.523683	0.180446	0.350045	0.424107	0	1	7	0	0	0	0	-0.547059	-0.76062	-0.490066	0.926694
chr3R-24126520	-0.0134947	-1.52559	-1.33742	-1.29814	0.478261	0	0	0	0	0	0	0	0.201338	0.072934	-0.596908	0
chrX-501493	-0.07429	0.670685	-0.094239	0.184196	0.469565	1	6	5	0	0	0	0	-0.19133	-0.679121	-0.28876	0.821958
chr2L-10720020	-0.197668	0.256645	0.491754	0.441469	0.434211	0	0	0	0	0	0	0	0	0	0	0
chr3R-12568896	-0.726054	-0.121164	-0.648098	-0.237521	0.380342	1	9	9	0	2	0	0	-1.39097	-1.40051	-1.02484	0
chr3R-16600866	0.253269	-0.252877	0.239005	-0.290995	0.398058	0	0	0	0	0	0	0	0.603825	0.384586	0.298103	0
chr2L-4613284	0.050538	-0.035045	-0.499395	-0.333632	0.421525	0	0	2	0	0	0	0	0	0	0	0.90642
chr2L-21923680	0.360438	-0.868828	0.135359	-0.537799	0.521531	0	8	8	0	0	0	0	-0.35103	-0.699014	0.189124	0
chr3R-25230160	-0.079585	0.538556	0.006009	0.245516	0.492958	0	0	0	0	0	0	0	-0.827969	-0.771352	-0.275562	0.868307
chr3L-12288069	-0.329146	0.496045	0.246692	0.273632	0.427861	1	4	9	0	0	0	0	0	0	0	0
chr3R-17722334	-0.35564	-0.514643	0.097723	0.465379	0.459821	0	0	0	0	0	0	0	1.08884	1.39239	1.362	0
chr3L-9210664	0.272716	-0.546234	0.503855	0.303084	0.480176	0	0	1	0	0	0	0	0.039965	0.49985	0.042378	0.758621
chr3R-1790284	-0.269828	-1.53286	-0.337611	-1.47636	0.448276	0	0	0	0	0	0	0	-0.499095	-0.660593	-0.968878	0.879781
chr2L-15366481	0.147893	1.76276	-1.03792	-1.91387	0.386555	1	5	11	0	0	0	0	0	0	0	0.984496
chr3R-9428144	-1.01638	-1.38771	1.81909	1.76863	0.526971	0	0	0	0	0	0	0	-0.199667	1.15403	-0.340174	0
chr3R-24250493	-0.315397	1.20846	0.146738	0.449286	0.428571	0	0	4	0	0	0	0	0	0	0	0.896552
chr2R-14162364	-0.300099	-0.19297	-0.333317	-0.598366	0.485149	0	0	4	1	0	0	0	0	0	0	0
chr3R-8091077	0.463844	-2.36334	-0.370948	0.445706	0.5	1	9	9	0	0	1	0	-0.019302	-0.203154	-0.023806	0
chr2L-19335502	0.601358	-1.14369	-0.849515	-0.81837	0.39207	2	2	9	2	0	0	0	-0.243223	0.160237	0.549	0.875256
chr3R-17744038	-0.638081	0.761204	1.53266	1.38363	0.418848	0	0	0	0	0	0	0	1.13633	1.41069	1.60554	0.745763
chr3L-16138534	0.450238	-1.47635	2.41635	1.14988	0.413793	0	0	0	0	2	0	0	0	0	0	0
chr2R-16455537	-0.206974	-0.911866	-0.893781	-0.755075	0.457711	0	0	4	0	0	0	1	-0.034313	-0.626367	-0.602364	0
chr3L-8236222	-0.629048	0.340023	0.387442	-0.337903	0.451613	1	0	1	0	2	0	0	0	0	0	0
chr4-345456	0.397017	-1.89608	-2.63874	-2.98235	0.34891	0	5	0	0	0	0	0	0	0	0	0
chr2L-3845457	0.329588	-0.720508	1.04777	-0.246832	0.509901	1	9	11	0	3	2	0	0	0	0	0
chr3R-805459	0.132657	1.3779	-3.32268	-2.18625	0.434426	4	0	0	4	4	0	0	0	0	0	0.814469
chr3R-10291565	0.088688	0.416568	0.628627	0.036619	0.336066	3	0	0	0	0	0	0	-0.554649	-0.237017	-0.326162	0.894737
chr3L-7538271	0.104335	1.31719	-0.488399	-0.714631	0.394089	0	0	0	0	0	0	0	-0.097118	-0.321179	-0.270688	0.926606
chr3R-12534921	-0.589331	0.682799	-0.186338	-0.345035	0.415493	2	9	9	0	1	0	0	-1.32466	-1.54963	-1.02738	0
chr3L-15722735	-0.0430287	-0.239167	-0.104521	0.415342	0.410959	3	1	8	1	2	4	2	0.027288	0.923769	1.34663	0.936449
chr3L-21691699	-0.292673	-1.34475	-0.000184	1.0592	0.481633	0	1	5	0	0	0	0	0	0	0	0.828154
chr3L-11422660	0.269206	-0.518245	0.877548	0.456611	0.379808	2	0	0	0	1	0	0	0	0	0	0.880734
chr2R-6514017	0.575953	-1.73892	-1.79233	-3.57598	0.376744	0	0	0	0	0	0	0	0	0	0	0
chr3L-12669640	0.177619	0.67221	-1.49766	-2.21312	0.486607	1	9	11	0	4	2	0	0	0	0	0.891304
chr2L-15294730	-0.0669893	0.452767	-0.332747	-0.227213	0.411067	0	2	7	0	0	0	0	-0.744501	-0.870107	-0.928877	0.984496
chr2L-12393096	0.7463	0.79433	0.60178	0.720203	0.233898	0	0	0	0	0	0	0	0	0	0	0.800781
chr2L-1648928	0.132297	0.2275	-0.378134	-0.905647	0.467662	3	1	2	1	2	0	2	0	0	0	0
chr2L-14370384	-0.12204	0.149596	-0.795954	-0.829544	0.493776	0	2	5	0	0	0	1	-0.131443	-0.145363	0.799901	0.866279
chr3L-10931134	0.055434	0.103709	0.119814	0.087674	0.348837	0	5	9	0	0	0	0	0	0	0	0.793834
chr2L-15151259	-0.174025	-1.23324	0.706775	1.59943	0.415	0	0	4	0	0	0	0	-0.483263	-0.792018	-0.930171	0.924675
chr3R-7381813	0.010632	1.44316	-0.793347	-1.69427	0.459677	0	0	0	0	0	0	0	-0.46669	-0.460596	0.146236	0
chr3L-6817332	0.128114	0.5185	-0.169364	-1.97852	0.568182	0	4	11	1	2	0	1	-0.394337	-0.620734	0.135252	0.746888
chr3L-15883641	-0.0549703	0.092208	0.78343	0.947197	0.479821	0	0	0	0	0	0	0	-0.179026	0.01959	0.247119	0.79402
chr3L-10942544	0.259936	-0.201938	0.179211	-0.181435	0.511962	1	6	9	1	1	1	0	-0.136044	0.467096	0.616581	0.793834
chr3R-6389532	0.258318	-0.649134	0.404378	0.747822	0.444444	1	2	6	0	0	0	0	-0.598798	-0.032013	-0.068261	0
chr3L-7541481	0.0689407	-1.00996	-2.24116	-2.88355	0.428571	0	0	0	0	0	0	0	-0.140273	-0.344687	-0.280029	0.926606
chr3L-20973148	0.647107	-1.54358	-0.765801	-1.41571	0.415584	0	2	3	0	0	0	0	0.036846	0.007183	0.685302	0.957447
chr2R-17482020	0.19444	0.775614	0.73097	0.857026	0.366379	0	0	6	0	0	0	0	0.587416	0.74816	0.717909	0
chr3L-21662062	-0.715295	-0.75527	0.254729	0.67101	0.433498	3	0	1	2	0	1	0	0	0	0	0.828154
chr3L-5838815	-0.24099	0.941181	0.743192	0.414465	0.420664	0	8	11	0	0	0	3	-0.372622	-0.955006	-0.29768	0
chr2L-10094924	-0.180842	0.055306	0.02152	1.06167	0.328431	0	0	3	0	0	0	0	0	0	0	0.80322
chr2L-21876393	0.301121	-1.17961	-0.576373	-0.20588	0.355634	1	9	11	1	0	0	0	-0.394784	-0.805781	0.082763	0
chr3R-1910903	0.224616	-0.384352	0.244477	-0.873347	0.51046	0	0	0	0	0	0	0	0	0	0	0.877483
chr2L-21866317	0.256173	-0.736911	-0.376352	0.554828	0.373391	4	9	11	0	3	0	1	-0.363444	-0.835126	-0.032058	0
chr3L-11015260	-0.564191	-1.29478	-1.52713	-1.1068	0.451852	1	9	11	0	0	0	0	0	0	0	0.793834
chr3L-3671704	-0.00108633	1.13496	0.670154	0.734471	0.400881	0	3	9	0	0	0	0	0.198026	-0.038467	-0.408141	0.939394
chr2R-20756791	0.392332	-1.92245	-0.304903	-0.045329	0.403101	2	0	2	1	1	3	1	-0.176488	-0.0993	-0.085527	0
chr3L-21712228	-0.0459113	-1.22992	0.158333	0.081859	0.457265	0	0	3	0	0	0	0	0.013248	-0.259393	-0.416866	0.828154
chr2L-21789970	0.47131	-0.203446	-2.73418	-2.60241	0.436214	2	9	11	0	2	0	0	-0.559411	-0.720474	-0.196749	0
chr3L-807028	0.160279	-1.26523	-0.258608	-0.710469	0.494318	4	0	4	1	1	0	1	1.56649	1.68188	1.85476	0.896552
chr3R-9353689	-0.203051	-0.509988	-0.375556	-0.446739	0.42029	0	0	0	0	0	0	0	0	0	0	0
chr2R-5414094	0.61505	2.01307	-0.103119	0.589307	0.306931	0	0	1	0	0	0	0	0	0	0	0
chr3R-3030561	-0.081821	0.203573	-0.850512	-2.00524	0.453659	0	0	0	0	0	0	0	0.336764	0.419806	-0.43455	0.811881
chr3R-6412648	-0.673816	-0.0999915	-0.153052	-1.44648	0.482759	2	1	5	1	3	0	0	-0.794577	-0.167885	0.198773	0
chr3L-3877150	0.392879	1.32016	-0.479942	-0.856459	0.424125	1	9	11	0	2	3	0	0	0	0	0.949686
chr3R-19316106	0.231565	0.801858	0.224369	-1.45745	0.401869	0	0	5	0	0	0	0	-0.671826	-0.496594	-0.509558	0.893345
chr3R-19269265	-0.293783	1.34793	-0.625925	-0.780925	0.43	0	0	5	0	0	0	0	-0.616104	-0.505761	-0.4475	0.893345
chr3R-22458778	-0.714323	-0.355455	-0.258177	0.44202	0.371921	0	0	0	0	0	0	0	-0.981669	-0.552764	-0.885421	0.872774
chr3R-22493468	-0.398314	-0.005866	-0.350138	-0.025059	0.448819	0	0	0	0	0	0	0	-0.905522	-0.42514	-0.604399	0.872774
chr3R-20436454	-0.155592	-1.95658	-0.086864	-1.17017	0.399123	0	0	0	0	0	0	0	-0.242206	-0.758248	-0.507764	0
chr3R-22602223	-0.372525	2.35284	0.92786	0.562898	0.549242	0	0	1	0	0	0	0	-0.232158	0.727656	-0.560203	0.931217
chr3R-17771694	0.528824	1.06391	-0.631708	-0.723625	0.408333	0	0	0	0	1	0	0	0.518211	1.45962	1.3977	0.745763
chr2L-4653503	-0.732215	-0.607093	-0.245648	-0.096777	0.395349	0	0	1	0	0	0	0	-0.732486	-0.989284	-0.722288	0.90642
chr3R-6397863	-0.175267	0.574222	-0.211533	0.083244	0.457778	4	2	6	1	4	0	2	-0.573241	-0.026122	0.001927	0
chr2L-14098291	0.486854	0.125516	-0.47861	-0.114327	0.426009	0	0	2	0	0	0	0	0.020658	-0.144369	-0.126335	0.852119
chr3R-9404101	0.226329	0.451742	-0.234025	0.168953	0.440433	0	0	0	0	0	0	0	-0.225164	1.07449	-0.26448	0
chr2L-16247488	0.0242943	0.457456	-1.21602	-1.62207	0.435294	0	0	0	0	0	0	0	-0.295965	-0.234688	-0.358725	0
chrX-4369861	0.337906	0.865803	0.069126	-0.086016	0.418699	1	9	7	0	1	0	0	0	0	0	0.901515
chr3L-13313091	-0.299298	0.420503	0.028684	-0.25811	0.473684	0	0	3	0	0	0	0	0	0	0	0.82249
chr3L-14580169	-0.709227	0.346195	-0.369976	-0.301039	0.429952	1	9	11	0	0	0	0	0	0	0	0
chr2R-16056078	-0.365716	-0.265526	0.06843	0.017293	0.524793	1	0	9	4	1	0	0	0	0	0	0.865994
chr3R-23026932	-0.177773	-1.33252	-0.180157	-0.116413	0.529148	1	4	7	0	0	0	0	0	0	0	0.875862
chr3R-15100108	-0.73725	0.788694	-0.451705	-1.22555	0.5	0	0	0	0	0	0	0	-0.134752	-0.75569	0.611119	0.859425
chr2L-2514250	-0.384034	0.456491	-0.087038	0.140168	0.37395	0	0	1	0	0	0	0	0	0	0	0.799642
chr3R-25111668	0.710773	-1.93246	0.326802	1.06054	0.445946	4	0	1	4	3	0	0	1.56307	1.10885	1.45848	0.868307
chr3L-12656853	0.018283	-0.158508	-0.766288	0.473412	0.416309	1	9	11	0	0	0	0	0	0	0	0.891304
chr3R-9362238	0.470533	-0.437078	-0.800867	-0.9126	0.471111	0	0	0	0	0	0	0	0	0	0	0
chr2R-11240831	-0.990927	-0.311476	0.307561	-0.420585	0.492683	5	1	3	4	3	2	1	0	0	0	0
chr3R-19284313	-0.467067	-0.547467	0.129214	-0.134978	0.454148	1	0	5	0	0	0	0	0	0	0	0.893345
chr3R-23167326	-0.49429	-0.856684	0.076188	-1.50634	0.430693	0	0	0	0	0	0	0	-0.733492	-0.095205	-0.621117	0.871928
chr3R-1908486	0.160729	-1.36197	-0.142256	-0.756837	0.44186	0	0	0	0	0	0	0	0	0	0	0.877483
chr3R-8613971	-1.04025	0.7758	-0.011575	1.4415	0.42	0	0	1	0	0	0	0	0	0	0	0.850508
chr3R-20915782	-0.346633	1.53004	-0.3067	0.6017	0.463054	1	9	9	1	3	2	0	0	0	0	0
chr2L-20521624	-0.129	0.491391	-0.12	0.467978	0.443478	0	0	0	0	0	0	0	-0.871962	-0.590666	-0.991322	0.906191
chr2R-6927710	-0.722856	-0.178931	-0.348568	-0.655388	0.427184	0	0	1	0	0	0	0	0	0	0	0.799523
chr3R-15077092	0.207248	-1.27308	-0.507635	-0.519855	0.473029	1	0	0	1	0	0	0	-0.120576	-0.655628	0.314453	0.859425
chr3R-1899523	-0.423437	0.848278	-0.6684	-0.374489	0.404444	0	0	0	0	0	0	0	0	0	0	0.877483
chr3L-21102900	-0.0738383	0.774449	-0.393417	-0.512798	0.43578	0	0	0	0	0	0	0	0	0	0	0.838196
chr3L-1110444	0.836629	-0.936477	-0.733614	-0.596341	0.45	0	7	11	0	0	0	0	0	0	0	0.803545
chr2L-20629830	0.992386	0.130847	-1.8668	-2.39913	0.465839	0	0	0	0	0	0	0	0	0	0	0.906191
chr2L-21974342	-0.427601	-0.766329	-0.225	-0.105415	0.482927	1	8	7	1	0	0	0	0	0	0	0
chr3R-22497305	-0.539849	0.459676	-0.067306	-0.391961	0.573276	0	0	0	0	0	0	0	0	0	0	0.872774
chr2R-18044625	-0.061036	-1.4525	-0.588855	2.18528	0.5	1	0	3	0	3	0	0	-0.448971	-0.332278	-0.363873	0
chr3R-13190706	-0.399754	-0.678038	-0.625232	-0.949494	0.417722	0	0	0	0	0	0	0	0	0	0	0
chr2L-15403508	-0.232146	-0.010106	-0.932665	-0.974906	0.471698	1	6	11	0	0	0	0	-0.542864	-0.973146	-1.02818	0.984496
chr2R-4652115	-0.703068	-0.257172	-1.70375	-1.22263	0.47012	0	0	1	0	0	0	0	-0.581992	-0.386724	-0.024428	0
chr3R-26733664	-2.32395	0.615091	-1.96208	2.50286	0.46371	1	9	9	0	1	1	0	-0.104396	0.786407	0.001471	0.903574
chr2R-15884487	0.317433	-0.336979	-0.90763	0.021635	0.469194	0	0	4	0	0	0	0	-0.103501	-0.241229	0.283905	0.865994
chr3L-6448940	-0.133373	0.080167	0.387333	0.313929	0.485714	0	5	4	0	0	0	0	-0.621194	-0.270096	-0.378175	0.839735
chrX-7322328	0.155904	-0.491048	-0.220784	-0.735593	0.444915	0	0	4	0	0	0	0	0	0	0	0.88984
chr3R-24403310	0.278824	-1.15914	0.200766	0.018468	0.41129	1	9	9	0	1	1	0	-0.077072	-0.084794	-0.281909	0
chr2L-13656807	0.03717	-2.21831	-1.36184	-0.903178	0.466667	0	0	0	0	0	0	0	0	0	0	0
chr3R-20991424	-0.587211	0.452871	0.119386	0.433623	0.457627	2	2	4	0	2	0	0	0	0	0	0
chr3R-24787374	-0.409853	-0.551152	-1.50581	-1.1625	0.495098	0	0	1	0	0	0	0	-0.453476	-0.534143	-0.491966	0.80177
chr2R-13860798	-0.507258	-0.654373	-0.050931	-0.039286	0.467532	0	0	2	0	0	0	0	-0.627502	0.14817	-0.686898	0.782341
chrX-17696274	0.467081	-0.311293	-0.170488	-0.370829	0.419512	1	9	7	0	5	1	0	0	0	0	0
chr3R-4273079	-0.580686	0.502292	0.990074	0.857696	0.446078	0	0	1	0	0	0	0	-0.84249	-0.884764	-0.804845	0.903114
chr3L-19127181	0.0777963	0.926826	0.090505	-0.083317	0.403846	0	0	0	0	0	0	0	-0.507872	-0.162098	0.547661	0.736986
chr3L-14381881	-0.739928	-0.330887	0.345368	0.431407	0.497835	0	0	1	0	0	0	0	0.073779	0.507597	0.649028	0.878405
chr3L-21783458	0.332046	-0.981572	0.078738	0.14349	0.539604	1	9	8	0	1	0	0	-0.49872	-0.660276	-0.390296	0.828154
chr3R-17293098	-0.294185	0.25209	-0.255912	0.131186	0.445255	1	9	9	0	0	0	0	-0.519323	-0.433222	1.22011	0
chr3R-22250042	-0.240611	-0.3445	-0.745952	-0.040024	0.52381	0	0	0	0	0	0	0	0	0	0	0.931608
chr3L-6452278	-1.54501	-0.839471	-1.06381	1.06104	0.418919	0	3	4	0	0	0	0	-0.629117	-0.299679	-0.413312	0.839735
chr3R-19305947	-0.441716	0.486044	-0.371828	-0.163097	0.447761	0	0	5	0	0	0	0	0	0	0	0.893345
chr2R-6718376	0.0914797	-0.112805	-0.113415	0.23939	0.370732	0	0	0	0	0	0	0	0.522683	0.709883	0.345512	0
chr3R-26671737	0.28439	-0.350318	-0.649463	-0.684829	0.434146	1	8	8	1	2	0	1	0.547218	0.69108	0.58959	0.903574
chr3L-15910649	0.417046	0.845023	-1.48823	-1.20396	0.45	0	0	0	0	0	0	0	-0.172444	0.09664	0.280308	0.79402
chr3R-8632038	-0.156793	-1.12554	0.18486	-0.29874	0.372	0	0	1	0	0	0	0	-0.592093	-0.179242	-0.545832	0.850508
chr3R-19334555	-0.146793	-1.14682	-0.389768	-0.508924	0.443038	0	0	5	0	0	0	0	-0.655272	-0.328885	-0.462639	0.893345
chr2L-15914990	0.677316	-3.14796	-0.616225	-1.3008	0.493976	0	0	0	0	0	0	0	0.89639	0.252699	-0.987952	0.925602
chr2L-15375332	-0.158162	0.359265	-1.5873	-2.55081	0.54902	0	5	11	0	0	0	0	0	0	0	0.984496
chr3R-14291438	-0.0118353	-0.661762	0.268122	0.093101	0.476793	0	0	0	0	0	0	0	0.507454	0.42169	0.565787	0
chr3R-21984568	-0.82547	1.07506	0.503881	-0.312431	0.461326	0	0	0	0	0	0	0	0.96477	1.63694	0.026334	0.855019
chr2L-1186730	-0.645282	1.65802	-0.079203	0.424686	0.304348	2	0	0	0	0	3	1	0	0	0	0
chr2R-13260183	0.155864	1.81898	0.368079	0.814699	0.310185	0	0	0	0	0	0	0	0.133206	0.568355	-0.392306	0.850178
chr3R-24525389	-0.978093	0.932509	-0.138426	0.003093	0.440741	0	0	0	0	0	0	0	-0.562857	-0.251529	-0.644074	0
chrX-18564452	-0.317121	1.61938	-1.39757	-1.77873	0.35	0	0	1	0	0	0	0	-0.086003	-0.308401	-0.095384	0.915858
chr3R-9731764	-0.508097	0.126186	-0.635323	-0.346444	0.396552	1	9	9	0	1	0	0	-0.703612	-0.585154	-0.217891	0
chr3L-13339692	-0.590869	-0.720162	0.254246	-0.083685	0.413793	1	0	3	0	1	0	0	0.629161	0.582785	-0.757028	0.82249
chr3R-1775168	-0.234175	-0.64825	0.362045	-1.11068	0.413636	0	0	0	0	0	0	0	-0.40501	-0.679372	-0.949272	0.879781
chr3R-18811075	-0.177835	-0.633317	-0.608762	-0.644393	0.528037	1	0	2	0	0	0	0	0	0	0	0.879931
chrX-8685793	0.186776	-0.875368	-0.654385	-0.895717	0.434426	0	9	7	0	0	0	0	0	0	0	0
chr3L-786026	0.63784	-0.330022	-0.425271	-0.941875	0.616667	3	0	5	2	1	0	0	1.84906	1.83829	2.02793	0.896552
chr3L-12685648	0.247318	-0.883162	-0.203831	-0.797262	0.470769	1	9	11	1	5	3	2	0.265539	0.06359	0.009046	0
chr2L-4762353	-0.0148877	-1.02659	-0.192644	0.32101	0.399038	0	0	1	0	0	0	0	0	0	0	0.90642
chr3R-17510412	0.633028	0.0889235	-0.022896	-0.003366	0.519802	0	0	0	0	0	0	0	-0.077561	0.495602	0.52815	0.982143
chr3R-4207748	0.313789	-0.743683	-1.11844	-0.931951	0.390244	0	1	2	0	0	0	0	0	0	0	0.903114
chr3L-13630282	0.119474	-0.531712	0.287597	1.03777	0.485437	0	0	3	0	0	0	0	0	0	0	0.8027
chr3L-13290224	0.0818107	-0.251526	-2.38416	-1.99351	0.442308	0	0	4	0	0	0	0	-0.048663	0.662946	-0.575902	0.82249
chr2R-11386203	-0.613333	-1.4306	0.202202	2.9246	0.480159	0	0	0	0	1	0	0	-0.435789	-0.037034	0.075653	0.80429
chrX-20251169	-0.899663	1.64118	-1.00029	-2.15351	0.442308	0	4	3	0	0	0	0	0	0	0	0
chrX-2028570	-0.119423	0.586806	-0.763483	-0.759765	0.517094	3	5	7	2	4	3	4	0.882057	0.312814	0.895297	0
chr3R-27306420	-0.352028	-2.02237	-0.601234	0.019511	0.451064	0	0	1	0	0	0	0	-0.89487	-0.576092	-0.261186	0.991098
chrX-1851828	0.392133	-1.53243	-2.10425	-2.34637	0.343529	0	0	0	0	0	0	0	0	0	0	0
chrX-11596393	-0.0914	0.878725	-0.028925	0.74265	0.37	0	0	0	0	0	0	0	0.731734	0.478854	0.733276	0
chr3L-21110930	0.578648	1.25534	0.514481	-1.97425	0.443396	0	0	0	0	1	0	0	0	0	0	0.838196
chr2R-10451520	0.330518	-0.245437	-2.27981	-2.47117	0.529126	0	0	0	0	0	0	0	0	0	0	0
chr2L-5613792	0.0605477	-0.116928	0.353905	0.803706	0.39801	0	3	7	0	0	0	0	-0.942962	-0.594203	-0.911428	0
chr3L-21795878	-0.211206	-0.07128	1.20691	-0.34122	0.455285	1	9	9	0	0	0	0	-0.471915	-0.564772	-0.260096	0.828154
chr3R-8003276	-0.422648	-0.025771	0.019344	0.376312	0.460993	1	0	6	0	0	0	0	-0.707475	-0.467939	-0.710804	0.888889
chr3R-18805293	-0.27013	1.32993	-0.084608	0.178235	0.441176	0	0	2	0	0	0	0	-0.588645	-0.149612	-0.99394	0.879931
chr2L-15422737	0.024866	0.022735	0.359128	0.13193	0.436242	1	7	11	0	0	1	1	0	0	0	0.984496
chr3R-19438814	-0.151275	-1.13414	0.024325	-0.296775	0.47	0	0	2	0	0	0	0	-0.471332	-0.495482	-0.435766	0.893345
chr3R-19252370	-0.158352	-1.44375	-1.19484	-1.85645	0.455197	0	0	5	0	0	0	0	-0.535656	-0.422798	-0.407998	0.893345
chr3R-3167763	0.188454	-0.934735	-0.767947	-0.716159	0.439614	0	1	3	0	0	0	0	0	0	0	0.841941
chr3R-6857536	-0.269858	-0.292986	-0.901967	-2.28628	0.488152	0	0	0	0	0	0	0	0	0	0	0
chr2L-1683143	-0.265949	-2.5578	-2.74198	-3.46427	0.364583	0	2	3	0	0	0	0	0	0	0	0
chr3R-12114519	0.263662	-0.716815	0.39524	0.076587	0.533654	2	0	0	0	1	0	1	-0.003781	0.298367	0.736045	0
chr3L-22174775	-0.162756	-0.097572	2.1868	0.230793	0.543269	4	0	6	4	3	0	0	0	0	0	0.776938
chr3R-4203818	-0.49708	1.27158	-0.064118	-0.714307	0.315126	0	0	1	0	0	0	0	0	0	0	0.903114
chr3R-12539959	-1.46056	1.91988	-0.1828	-1.94886	0.450909	1	9	9	0	2	0	0	0	0	0	0
chr2L-14529780	-0.218194	-1.24212	1.98046	-0.644595	0.480952	3	6	11	1	3	0	1	-0.335657	0.026589	1.71227	0.928903
chr3R-23686583	-0.251935	-0.572971	-0.158318	-0.35991	0.443946	0	0	0	0	0	0	0	-0.913413	-0.703621	-0.877271	0.870259
chr3R-5467931	-0.000659	0.201831	0.143314	0.312035	0.356589	0	0	0	0	0	0	0	-0.043318	0.069754	-0.367432	0
chrX-20465122	0.169163	-0.903106	-0.943298	-0.708787	0.417021	0	5	7	0	0	0	0	0	0	0	0.887693
chr3L-3432917	0.88172	0.0151365	0.223	-0.479045	0.436364	1	0	1	0	1	0	3	0.975834	0.684629	1.17403	0
chr2L-2470549	-0.26921	1.07421	0.020197	0.259254	0.447368	0	4	9	0	0	0	0	0	0	0	0.799642
chr3R-23876616	-0.463045	0.250244	0.073444	0.046	0.417778	0	0	0	0	0	0	0	-0.771425	-0.3164	-0.893835	0.896197
chr3R-12063120	-0.665339	1.33156	0.061618	-0.380394	0.431535	8	0	0	8	2	0	6	1.19741	0.741205	1.3902	0
chr3R-27707719	0.0806313	-0.585679	-0.798544	-0.836311	0.330097	0	2	1	0	0	0	0	0	0	0	0
chr2L-15639606	0.296385	-0.758741	-0.128934	1.39403	0.507353	0	0	3	0	0	0	0	-0.253751	-0.490126	-1.02785	0.870528
chr3R-2751755	0.480088	-1.56736	-0.927929	-0.24731	0.5	1	9	9	0	0	0	0	-1.10636	-1.17295	-0.76683	0
chr3R-17983810	0.186077	-0.429992	-0.147338	-0.394659	0.532468	1	0	3	3	1	0	0	-0.307071	-0.237796	-0.678215	0.874142
chr2R-18135998	0.477601	-1.73789	-0.32986	-0.546589	0.420561	2	9	11	0	1	0	0	0.232428	0.061783	0.321791	0.872024
chr2R-6523376	0.232081	-2.06842	-2.07376	-3.56132	0.338308	0	0	0	0	0	0	0	0	0	0	0
chr3R-1795454	0.190182	-1.89982	0.207794	-0.463988	0.522267	0	0	0	0	0	0	0	-0.508645	-0.645888	-0.945169	0.879781
chr3R-23873917	-1.42965	-0.147854	-0.368133	0.356674	0.472103	0	0	0	0	0	1	0	0	0	0	0.896197
chr3R-25395835	0.0826697	1.43262	-0.199431	-0.435877	0.450237	1	9	9	0	0	0	0	-0.742802	-0.832713	-0.38259	0.71408
chrX-6331872	-0.0656993	2.39065	0.906439	0.620659	0.478049	0	0	0	0	0	0	0	-0.153079	-0.733273	-0.061408	0.847534
chr3R-21861953	-0.214914	-0.439945	-0.666144	-0.963764	0.520295	1	4	5	1	3	0	2	0.997867	1.5729	1.37829	0
chr2R-11220332	0.603034	0.324199	1.21404	-1.1203	0.487179	1	6	8	0	1	0	0	0.251442	-0.045025	0.063401	0
chr3L-11585805	-0.135657	-0.839792	0.422727	-0.773409	0.575758	0	0	0	1	2	0	0	0.319869	1.06887	0.014687	0
chr3R-25104167	-0.130461	-2.4757	0.445042	-0.69023	0.41841	2	0	1	3	0	0	0	1.46294	1.15456	1.44787	0.868307
chr3R-12061295	-1.05744	1.09833	0.531592	0.695249	0.457711	7	0	0	5	2	0	5	1.25052	0.759538	1.4118	0
chr2R-12328561	-0.313226	-0.515876	0.387949	0.270342	0.461538	0	0	2	0	0	0	0	-0.455779	0.012494	-0.752977	0.73102
chr3L-14867689	0.66398	0.151294	-1.09333	-1.69341	0.447761	0	0	0	0	0	0	0	-0.281593	0.355012	-0.493817	0.936416
chr3R-17786117	0.086501	1.24743	0.349983	0.67012	0.321918	0	0	0	0	0	0	0	0.045144	1.37436	1.11857	0.745763
chrX-16069034	-0.469413	2.77088	-0.352817	1.33315	0.422535	0	9	7	0	1	0	0	0	0	0	0.822006
chr2L-5414773	0.451056	0.791315	-1.06751	-1.3125	0.492268	1	9	11	0	0	0	0	-0.537256	-0.34965	-0.081298	0.751304
chr2R-9756997	-0.485666	-0.54536	-0.035233	0.287651	0.302326	1	0	0	0	0	0	0	0	0	0	0
chr2R-4114145	-0.358989	0.11831	0.261065	0.513148	0.453704	0	1	0	0	2	0	0	0	0	0	0
chr2L-18401440	0.35212	-0.658274	0.545	-0.377207	0.42723	0	0	0	0	0	0	0	-0.490879	-0.552936	-0.345598	0.869616
chr3R-12531026	0.510837	-0.43931	-1.06244	-0.882356	0.422222	2	9	9	1	1	0	0	-1.3113	-1.55441	-1.03276	0
chr3R-11448624	-0.237037	-2.11558	-2.50141	-3.36601	0.364583	0	2	6	0	0	0	0	0	0	0	0.862144
chr2R-4225699	-0.52149	0.884535	0.190675	0.336478	0.328467	0	2	8	0	0	0	0	-0.122196	0.020396	-0.298344	0.789773
chr2R-17462737	0.646673	-0.905242	-0.8575	-1.20794	0.441176	0	0	5	0	2	0	0	0.2288	0.524952	0.505681	0.752212
chr3L-4944797	-0.328297	-0.923933	-1.98429	-1.56624	0.36	0	0	6	0	0	0	0	-0.257722	-0.278188	-0.660851	0.930576
chr3R-22604783	-0.909525	-0.303627	0.448435	-2.27971	0.495935	0	0	1	0	0	0	0	-0.174281	0.747106	-0.550239	0.931217
chr3L-21707466	0.448612	-0.939914	-0.775985	-1.08074	0.536946	0	0	3	0	0	0	0	-0.073093	-0.269054	-0.397828	0.828154
chr3R-17244184	0.169175	0.0392275	-0.351912	-0.352819	0.480392	1	9	9	0	2	1	0	0	0	0	0
chr2R-9297756	0.0172273	-0.0839575	-0.603341	-0.193834	0.331839	0	0	0	0	0	0	0	0	0	0	0
chr3R-24610205	-0.127373	-0.0980475	0.143571	0.492381	0.47619	0	0	1	0	0	0	0	-0.715107	-0.08021	-0.483742	0
chr3R-19276276	-0.104958	0.661967	-0.626444	-0.848431	0.401674	0	0	5	0	0	0	0	0	0	0	0.893345
chr3R-21890254	-0.333333	-0.911922	-0.811711	-0.6542	0.431111	0	0	1	0	0	0	0	0.478791	1.34191	0.81084	0
chr3L-22139704	0.051227	3.8742	2.67701	-2.02086	0.49537	2	1	7	1	0	0	0	0	0	0	0.776938
chr3R-22622429	0.0281103	1.15385	-1.00435	-1.64261	0.419643	4	0	0	2	2	0	0	-0.033808	0.559885	-0.523603	0.931217
chr3R-13249152	-0.283889	-0.839233	0.093583	-0.233417	0.413333	0	0	0	0	0	0	0	-0.845894	-0.503565	-0.824386	0.784053
chr2L-1417012	-0.376041	-0.244549	0.277561	0.864415	0.414634	6	2	6	6	3	4	0	0	0	0	0
chr3R-17254117	-0.189958	-0.564097	-0.739412	-0.125231	0.508403	1	9	9	1	1	1	0	-0.753342	-0.539236	0.634693	0
chr3R-21908209	-0.410138	0.011797	-0.165368	-0.224416	0.419913	1	7	8	0	0	0	0	0.8129	1.39278	0.564909	0
chr3R-3559795	0.37778	-1.32779	-2.23284	-2.82021	0.365044	0	0	1	0	0	0	0	0	0	0	0
chr3R-10314238	-0.010764	-1.03312	-0.288634	-0.741898	0.537037	0	0	1	0	0	0	0	0	0	0	0
chrX-20840192	-0.485408	-0.790906	0.835109	-1.93668	0.454148	0	2	0	0	0	0	0	-0.27622	-0.525119	-0.385402	0.887693
chr2L-14302167	-0.320049	-1.19661	-1.57032	-0.958614	0.460396	1	0	4	1	2	1	0	-0.337306	-0.222568	0.166751	0.965225
chr3L-15527561	-0.510301	-0.09074	0.450773	0.356352	0.476395	5	0	0	1	4	0	5	0	0	0	0
chr2L-15348902	0.14116	-0.19651	-0.236304	-0.178043	0.410628	0	9	11	0	0	0	0	0	0	0	0.984496
chr2R-15887269	0.14608	-0.147223	-0.446685	-0.200204	0.407407	0	0	4	0	0	0	1	-0.105212	-0.225935	0.267684	0.865994
chr3R-18625913	-0.163795	-0.0460065	0.010541	-0.057208	0.506494	0	0	1	0	0	0	0	0	0	0	0
chr3L-18398737	0.081653	0.696724	-0.000755	-0.255306	0.522449	1	7	10	0	0	0	1	0	0	0	0.939371
